# Supplementary material for: Diverse Bacteria Utilize Alginate Within the Microbiome of the Giant Kelp Macrocystis pyrifera
Source: Front Microbiol. 2018 Aug 20;9:1914. doi: 10.3389/fmicb.2018.01914 (PMC6110156; doi:10.3389/fmicb.2018.01914)
Supplement: Supplementary file 5 [file Data_Sheet_2.CSV]

SampleID	BarcodeSequence	sampleNumber	EBI_Accession	Corresponding_culture_samples	Date	Site	Site_Number	Sample_Type	Data_Type	Media	CollectionBag	Depth	Water_In.Out_Bed	ExtractionPlate	ExtractionWell	Swab1	Swab2	Temp(C)	Conductivity(uS/cm)	Salinity(ppt)	pH	True_Depth(m)	Pressure(mmHg)	Description
GS.Blade.bottom.54	ATTGGGACATAA	M54	ERS1815291 (SAMEA104156273)	K2S3_OTOA	2015-08-11	Goose_South	3	Blade	swab	NA	185	bottom	NA	7	H2	1715	1717	14.9	48086	31.36	8.06	7	763.4	GS_Blade_bottom
GS.Blade.bottom.59	CGTAAGATGCCT	M59	ERS1815292 (SAMEA104156274)	K4S3_OTOA	2015-08-11	Goose_South	3	Blade	swab	NA	179	bottom	NA	7	C6	1701	1691	14.9	48086	31.36	8.06	7	763.4	GS_Blade_bottom
GS.Blade.bottom.55	GAGGTATTCTGA	M55	ERS1815293 (SAMEA104156275)	K3S3_OTOA	2015-08-11	Goose_South	3	Blade	swab	NA	202	bottom	NA	7	C5	1687	1709	14.9	48086	31.36	8.06	7	763.4	GS_Blade_bottom
GS.Blade.bottom.60	GCAAGCTGTCTC	M60	ERS1815294 (SAMEA104156276)	K5S3_OTOA	2015-08-11	Goose_South	3	Blade	swab	NA	none	bottom	NA	7	B2	1674	1689	14.9	48086	31.36	8.06	7	763.4	GS_Blade_bottom
GS.Blade.bottom.52	TCAACTATGTCT	M52	ERS1815295 (SAMEA104156277)	K1S3_OTOA	2015-08-11	Goose_South	3	Blade	swab	NA	204	bottom	NA	7	E2	1692	1696	14.9	48086	31.36	8.06	7	763.4	GS_Blade_bottom
GS.Blade.mid.53	AACGTCCTGTGC	M53	ERS1815296 (SAMEA104156278)	K2S3_NTNA	2015-08-11	Goose_South	3	Blade	swab	NA	186	mid	NA	7	C3	1706	1684	15.7	47923	31.33	8.1	7	763.4	GS_Blade_mid
GS.Blade.mid.56	ACGCTCCCATCG	M56	ERS1815297 (SAMEA104156279)	K3S3_NTNA	2015-08-11	Goose_South	3	Blade	swab	NA	201	mid	NA	7	D4	1693	1677	15.7	47923	31.33	8.1	7	763.4	GS_Blade_mid
GS.Blade.mid.58	GACCATGTAGTA	M58	ERS1815298 (SAMEA104156280)	K5S3_NTNA	2015-08-11	Goose_South	3	Blade	swab	NA	181	mid	NA	7	A2	1705	1713	15.7	47923	31.33	8.1	7	763.4	GS_Blade_mid
GS.Blade.mid.51	GCTTATTGCTTA	M51	ERS1815299 (SAMEA104156281)	K1S3_NTNA	2015-08-11	Goose_South	3	Blade	swab	NA	207	mid	NA	7	A1	1707	1719	15.7	47923	31.33	8.1	7	763.4	GS_Blade_mid
GS.Blade.mid.57	TTACCACATCTA	M57	ERS1815300 (SAMEA104156282)	K4S3_NTNA	2015-08-11	Goose_South	3	Blade	swab	NA	203	mid	NA	7	F1	1688	1685	15.7	47923	31.33	8.1	7	763.4	GS_Blade_mid
GS.Blade.top.61	AAGGTGGACAAG	M61	ERS1815301 (SAMEA104156283)	NA	2015-08-11	Goose_South	3	Blade	swab	NA	164	top	NA	7	D3	1718	1697	15.7	47923	31.33	8.1	7	763.4	GS_Blade_top
GS.Blade.top.64	GTGTGCTAACGT	M64	ERS1815302 (SAMEA104156284)	NA	2015-08-11	Goose_South	3	Blade	swab	NA	205	top	NA	7	F3	1700	1672	15.7	47923	31.33	8.1	7	763.4	GS_Blade_top
GS.Blade.top.63	TATAGAAGAATG	M63	ERS1815303 (SAMEA104156285)	NA	2015-08-11	Goose_South	3	Blade	swab	NA	177	top	NA	7	E3	1703	1695	15.7	47923	31.33	8.1	7	763.4	GS_Blade_top
GS.Blade.top.65	TATCTTCCTGAA	M65	ERS1815304 (SAMEA104156286)	NA	2015-08-11	Goose_South	3	Blade	swab	NA	163	top	NA	7	C2	1699	1716	15.7	47923	31.33	8.1	7	763.4	GS_Blade_top
GS.Blade.top.62	TGAGCGCACGCG	M62	ERS1815305 (SAMEA104156287)	NA	2015-08-11	Goose_South	3	Blade	swab	NA	162	top	NA	7	A4	1678	1698	15.7	47923	31.33	8.1	7	763.4	GS_Blade_top
ST.Blade.bottom.10	AGAGCTCCTCTG	M10	ERS1815315 (SAMEA104156297)	K5S1_OTOA	2015-08-05	Stryker	1	Blade	swab	NA	2004	bottom	NA	7	D5	1741	1405	13.2	47930	31.2	7.79	5	763	ST_Blade_bottom
ST.Blade.bottom.7	ATGGCCTGACTA	M7	ERS1815316 (SAMEA104156298)	K4S1_OTOA	2015-08-05	Stryker	1	Blade	swab	NA	2007	bottom	NA	7	B1	1760	1075	13.2	47930	31.2	7.79	5	763	ST_Blade_bottom
ST.Blade.bottom.2	CTCAGGAGACTT	M2	ERS1815317 (SAMEA104156299)	K2S1_OTOA	2015-08-05	Stryker	1	Blade	swab	NA	2006	bottom	NA	7	G4	1109	1751	13.2	47930	31.2	7.79	5	763	ST_Blade_bottom
ST.Blade.bottom.3	CTTCGCGGATGT	M3	ERS1815318 (SAMEA104156300)	K3S1_OTOA	2015-08-05	Stryker	1	Blade	swab	NA	2003	bottom	NA	7	A3	1392	1765	13.2	47930	31.2	7.79	5	763	ST_Blade_bottom
ST.Blade.bottom.8	TGAGTTCGGTCC	M8	ERS1815319 (SAMEA104156301)	K1S1_OTOA	2015-08-05	Stryker	1	Blade	swab	NA	2008	bottom	NA	7	F4	1745	1747	13.2	47930	31.2	7.79	5	763	ST_Blade_bottom
ST.Blade.mid.4	ACAAGTGCTGCT	M4	ERS1815320 (SAMEA104156302)	K1S1_NTNA	2015-08-05	Stryker	1	Blade	swab	NA	2002	mid	NA	7	B6	1768	1102	NA	NA	NA	NA	NA	NA	ST_Blade_mid
ST.Blade.mid.9	AGTTCGGCATTG	M9	ERS1815321 (SAMEA104156303)	K5S1_NTNA	2015-08-05	Stryker	1	Blade	swab	NA	2001	mid	NA	7	H3	1070	1766	NA	NA	NA	NA	NA	NA	ST_Blade_mid
ST.Blade.mid.1	ATGCAACTCGAA	M1	ERS1815322 (SAMEA104156304)	K4S1_NTNA	2015-08-05	Stryker	1	Blade	swab	NA	94	mid	NA	7	G1	1092	1767	NA	NA	NA	NA	NA	NA	ST_Blade_mid
ST.Blade.mid.5	CATCCTGAGCAA	M5	ERS1815323 (SAMEA104156305)	K2S1_NTNA	2015-08-05	Stryker	1	Blade	swab	NA	2005	mid	NA	7	G5	1754	1065	NA	NA	NA	NA	NA	NA	ST_Blade_mid
ST.Blade.mid.6	CATGAGACTGTA	M6	ERS1815324 (SAMEA104156306)	K3S1_NTNA	2015-08-05	Stryker	1	Blade	swab	NA	2009	mid	NA	7	A5	1758	1759	NA	NA	NA	NA	NA	NA	ST_Blade_mid
ST.Blade.top.12	AGACAAGCTTCC	M12	ERS1815325 (SAMEA104156307)	NA	2015-08-05	Stryker	1	Blade	swab	NA	S2	top	NA	7	F5	1301	1270	NA	NA	NA	NA	NA	NA	ST_Blade_top
ST.Blade.top.13	CTAATATTTGAA	M13	ERS1815326 (SAMEA104156308)	NA	2015-08-05	Stryker	1	Blade	swab	NA	S3	top	NA	7	E4	1309	1310	NA	NA	NA	NA	NA	NA	ST_Blade_top
ST.Blade.top.15	CTTTATGTGTCA	M15	ERS1815327 (SAMEA104156309)	NA	2015-08-05	Stryker	1	Blade	swab	NA	S5	top	NA	7	D1	1302	1293	NA	NA	NA	NA	NA	NA	ST_Blade_top
ST.Blade.top.14	GAATGACGTTTG	M14	ERS1815328 (SAMEA104156310)	NA	2015-08-05	Stryker	1	Blade	swab	NA	S4	top	NA	7	H5	1300	1281	NA	NA	NA	NA	NA	NA	ST_Blade_top
ST.Blade.top.11	TAAGCGTCTCGA	M11	ERS1815329 (SAMEA104156311)	NA	2015-08-05	Stryker	1	Blade	swab	NA	S1	top	NA	7	C4	1307	1305	NA	NA	NA	NA	NA	NA	ST_Blade_top
TB.Blade.bottom.28	ATCATCTCGGCG	M28	ERS1815339 (SAMEA104156321)	K1S2_OTOA	2015-08-06	Triquet	2	Blade	swab	NA	2001	bottom	NA	7	G2	1290	1299	14.7	48111	31.37	7.94	5	764.4	TB_Blade_bottom
TB.Blade.bottom.31	GCGTACGGGTGA	M31	ERS1815340 (SAMEA104156322)	K4S2_OTOA	2015-08-06	Triquet	2	Blade	swab	NA	2005	bottom	NA	7	D6	1306	1262	14.7	48111	31.37	7.94	5	764.4	TB_Blade_bottom
TB.Blade.bottom.29	GGTCGAATTGCT	M29	ERS1815341 (SAMEA104156323)	K2S2_OTOA	2015-08-06	Triquet	2	Blade	swab	NA	2003	bottom	NA	7	E1	1271	1287	14.7	48111	31.37	7.94	5	764.4	TB_Blade_bottom
TB.Blade.bottom.30	TCTGATCGAGGT	M30	ERS1815342 (SAMEA104156324)	K3S2_OTOA	2015-08-06	Triquet	2	Blade	swab	NA	2008	bottom	NA	7	H4	1284	1272	14.7	48111	31.37	7.94	5	764.4	TB_Blade_bottom
TB.Blade.mid.33	ATCACATTCTCC	M33	ERS1815343 (SAMEA104156325)	K2S2_NTNA	2015-08-06	Triquet	2	Blade	swab	NA	2002	mid	NA	7	B3	1298	1285	14.8	48025	31.32	7.95	0	764.4	TB_Blade_mid
TB.Blade.mid.35	GAGCATTACATG	M35	ERS1815344 (SAMEA104156326)	K4S2_NTNA	2015-08-06	Triquet	2	Blade	swab	NA	2004	mid	NA	7	E5	1288	1276	14.8	48025	31.32	7.95	0	764.4	TB_Blade_mid
TB.Blade.mid.32	GGTACTGTACCA	M32	ERS1815345 (SAMEA104156327)	K1S2_NTNA	2015-08-06	Triquet	2	Blade	swab	NA	2006	mid	NA	7	D2	1296	1275	14.8	48025	31.32	7.95	0	764.4	TB_Blade_mid
TB.Blade.mid.36	TCAATGACCGCA	M36	ERS1815346 (SAMEA104156328)	K5S2_NTNA	2015-08-06	Triquet	2	Blade	swab	NA	2009	mid	NA	7	C1	1260	1268	14.8	48025	31.32	7.95	0	764.4	TB_Blade_mid
TB.Blade.mid.34	TGGCATGTTGGT	M34	ERS1815347 (SAMEA104156329)	K3S2_NTNA	2015-08-06	Triquet	2	Blade	swab	NA	2007	mid	NA	7	F2	1274	1295	14.8	48025	31.32	7.95	0	764.4	TB_Blade_mid
TB.Blade.top.38	CCAGGGACTTCT	M38	ERS1815348 (SAMEA104156330)	NA	2015-08-06	Triquet	2	Blade	swab	NA	2009b	top	NA	7	B5	1303	1294	14.8	48025	31.32	7.95	0	764.4	TB_Blade_top
TB.Blade.top.41	CGAGTATACAAC	M41	ERS1815349 (SAMEA104156331)	NA	2015-08-06	Triquet	2	Blade	swab	NA	2004b	top	NA	7	B4	1280	1286	14.8	48025	31.32	7.95	0	764.4	TB_Blade_top
TB.Blade.top.37	GTCTATACATAT	M37	ERS1815350 (SAMEA104156332)	NA	2015-08-06	Triquet	2	Blade	swab	NA	2005b	top	NA	7	G3	1267	1261	14.8	48025	31.32	7.95	0	764.4	TB_Blade_top
TB.Blade.top.39	TTACCCGCACAG	M39	ERS1815351 (SAMEA104156333)	NA	2015-08-06	Triquet	2	Blade	swab	NA	2002b	top	NA	7	A6	1308	1289	14.8	48025	31.32	7.95	0	764.4	TB_Blade_top
TB.Blade.top.40	TTGGTGCCTGTG	M40	ERS1815352 (SAMEA104156334)	NA	2015-08-06	Triquet	2	Blade	swab	NA	2007b	top	NA	7	H1	1283	1291	14.8	48025	31.32	7.95	0	764.4	TB_Blade_top
GS.Water.bottom.in.69	ACCCTGGGTATC	M69	ERS1815306 (SAMEA104156288)	NA	2015-08-11	Goose_South	3	Water	swab	NA	31	bottom	in	7	F10	NA	NA	14.9	48086	31.36	8.06	8	763.4	GS_Water_bottom_in
GS.Water.bottom.in.73	ATCGATCCACAG	M73	ERS1815307 (SAMEA104156289)	NA	2015-08-11	Goose_South	3	Water	swab	NA	8	bottom	in	7	B10	NA	NA	14.9	48086	31.36	8.06	8	763.4	GS_Water_bottom_in
GS.Water.bottom.out.78	GTCACCAATCCG	M78	ERS1815308 (SAMEA104156290)	NA	2015-08-11	Goose_South	3	Water	swab	NA	33	bottom	out	7	H10	NA	NA	14.9	48086	31.36	8.06	8	763.4	GS_Water_bottom_out
GS.Water.bottom.out.79	TATAATCCGAGG	M79	ERS1815309 (SAMEA104156291)	NA	2015-08-11	Goose_South	3	Water	swab	NA	34	bottom	out	7	F6	NA	NA	14.9	48086	31.36	8.06	8	763.4	GS_Water_bottom_out
GS.Water.bottom.in.71	TCCCGCCTACGC	M71	ERS1815310 (SAMEA104156292)	NA	2015-08-11	Goose_South	3	Water	swab	NA	30	bottom	in	7	E10	NA	NA	14.9	48086	31.36	8.06	8	763.4	GS_Water_bottom_in
GS.Water.surface.out.75	ACGACCTACGCT	M75	ERS1815311 (SAMEA104156293)	NA	2015-08-11	Goose_South	3	Water	swab	NA	37	top	out	7	A10	NA	NA	15.7	47923	31.33	8.1	8	763.4	GS_Water_surface_out
GS.Water.surface.in.67	GTGACTAGTGAT	M67	ERS1815312 (SAMEA104156294)	WS3_NTNA	2015-08-11	Goose_South	3	Water	swab	NA	16	top	in	7	G6	NA	NA	15.7	47923	31.33	8.1	8	763.4	GS_Water_surface_in
GS.Water.surface.out.76	GTTCCCAACGGT	M76	ERS1815313 (SAMEA104156295)	NA	2015-08-11	Goose_South	3	Water	swab	NA	32	top	out	7	G10	NA	NA	15.7	47923	31.33	8.1	8	763.4	GS_Water_surface_out
GS.Water.surface.in.68	TACTAGATATTA	M68	ERS1815314 (SAMEA104156296)	WS3_NTNA	2015-08-11	Goose_South	3	Water	swab	NA	4	top	in	7	C10	NA	NA	15.7	47923	31.33	8.1	8	763.4	GS_Water_surface_in
ST.Water.bottom.out.25	GAAGGAAAGTAG	M25	ERS1815336 (SAMEA104156318)	NA	2015-08-05	Stryker	1	Water	swab	NA	11	bottom	out	7	H6	NA	NA	NA	NA	NA	NA	NA	NA	ST_Water_bottom_out
TB.Water.surface.out.48	GGTCTCCTACAG	M48	ERS1815359 (SAMEA104156341)	NA	2015-08-06	Triquet	2	Water	swab	NA	4	top	out	7	D10	NA	NA	14.9	48015	31.31	8.02	0	764.4	TB_Water_surface_out
ST.Blade.top.culture.K3S1NA	CTGATGTACACG	K3S1NA	ERS1815330 (SAMEA104156312)	NA	2015-08-05	Stryker	1	Blade	culture	alginate_marine	2002	mid	NA	Tube_extraction	NA	NA	NA	NA	NA	NA	NA	NA	NA	K3S1NA
ST.Blade.top.culture.K3S1NT	CAAATTCGGGAT	K3S1NT	ERS1815331 (SAMEA104156313)	NA	2015-08-05	Stryker	1	Blade	culture	tryptone_marine	2002	mid	NA	Tube_extraction	NA	NA	NA	NA	NA	NA	NA	NA	NA	K3S1NT
ST.Blade.top.culture.K4S1NA	TGGAGCCTTGTC	K4S1NA	ERS1815332 (SAMEA104156314)	NA	2015-08-05	Stryker	1	Blade	culture	alginate_marine	94	mid	NA	Tube_extraction	NA	NA	NA	NA	NA	NA	NA	NA	NA	K4S1NA
ST.Blade.top.culture.K4S1NT	TACGGTCTGGAT	K4S1NT	ERS1815333 (SAMEA104156315)	NA	2015-08-05	Stryker	1	Blade	culture	tryptone_marine	94	mid	NA	Tube_extraction	NA	NA	NA	NA	NA	NA	NA	NA	NA	K4S1NT
ST.Blade.top.culture.K5S1NA	ACGTGCCTTAGA	K5S1NA	ERS1815334 (SAMEA104156316)	NA	2015-08-05	Stryker	1	Blade	culture	alginate_marine	2001	mid	NA	Tube_extraction	NA	NA	NA	NA	NA	NA	NA	NA	NA	K5S1NA
ST.Blade.top.culture.K5S1NT	ACGTATTCGAAG	K5S1NT	ERS1815335 (SAMEA104156317)	NA	2015-08-05	Stryker	1	Blade	culture	tryptone_marine	2001	mid	NA	Tube_extraction	NA	NA	NA	NA	NA	NA	NA	NA	NA	K5S1NT
ST.Water.top.culture.WS1NA	GCGAGGAAGTCC	WS1NA	ERS1815337 (SAMEA104156319)	NA	2015-08-05	Stryker	1	Water	culture	alginate_marine	NA	top	NA	Tube_extraction	NA	NA	NA	NA	NA	NA	NA	NA	NA	WS1NA
ST.Water.bottom.culture.WS1OT	CACCCTTGCGAC	WS1OT	ERS1815338 (SAMEA104156320)	NA	2015-08-05	Stryker	1	Water	culture	tryptone_marine	NA	bottom	NA	Tube_extraction	NA	NA	NA	NA	NA	NA	NA	NA	NA	WS1OT
TB.Blade.top.culture.K1S2NA	AATACAGACCTG	K1S2NA	ERS1815353 (SAMEA104156335)	NA	2015-08-06	Triquet	2	Blade	culture	alginate_marine	2006	mid	NA	7	B12	NA	NA	14.8	48025	31.32	7.95	0	764.4	K1S2NA
TB.Blade.top.culture.K1S2NT	AAGGCGCTCCTT	K1S2NT	ERS1815354 (SAMEA104156336)	NA	2015-08-06	Triquet	2	Blade	culture	tryptone_marine	2006	mid	NA	7	C11	NA	NA	14.8	48025	31.32	7.95	0	764.4	K1S2NT
TB.Blade.top.culture.K3S2NA	GATCTAATCGAG	K3S2NA	ERS1815355 (SAMEA104156337)	NA	2015-08-06	Triquet	2	Blade	culture	alginate_marine	2007	mid	NA	7	C12	NA	NA	14.8	48025	31.32	7.95	0	764.4	K3S2NA
TB.Blade.top.culture.K3S2NT	CGCAATGAGGGA	K3S2NT	ERS1815356 (SAMEA104156338)	NA	2015-08-06	Triquet	2	Blade	culture	tryptone_marine	2007	mid	NA	7	D11	NA	NA	14.8	48025	31.32	7.95	0	764.4	K3S2NT
TB.Blade.top.culture.K4S2NA	CCGCAGCCGCAG	K4S2NA	ERS1815357 (SAMEA104156339)	NA	2015-08-06	Triquet	2	Blade	culture	alginate_marine	2004	mid	NA	7	D12	NA	NA	14.8	48025	31.32	7.95	0	764.4	K4S2NA
TB.Blade.top.culture.K4S2NT	CCTCGCATGACC	K4S2NT	ERS1815358 (SAMEA104156340)	NA	2015-08-06	Triquet	2	Blade	culture	tryptone_marine	2004	mid	NA	7	A11	NA	NA	14.8	48025	31.32	7.95	0	764.4	K4S2NT
TB.Water.top.culture.WS2NA	GGACAAGTGCGA	WS2NA	ERS1815360 (SAMEA104156342)	NA	2015-08-06	Triquet	2	Water	culture	alginate_marine	NA	top	NA	Tube_extraction	NA	NA	NA	14.9	48015	31.31	8.02	0	764.4	WS2NA
TB.Water.top.culture.WS2NT	ATGCCTCGTAAG	WS2NT	ERS1815361 (SAMEA104156343)	NA	2015-08-06	Triquet	2	Water	culture	tryptone_marine	NA	top	NA	Tube_extraction	NA	NA	NA	14.9	48015	31.31	8.02	0	764.4	WS2NT
GS.Blade.top.culture.K2S3NA	GAACCGTGCAGG	K2S3NA	ERS1815283 (SAMEA104156265)	NA	2015-08-11	Gooose_South	3	Blade	culture	alginate_marine	186	mid	NA	7	E12	NA	NA	15.7	47923	31.33	8.1	7	763.4	K2S3NA
GS.Blade.top.culture.K2S3NT	CATTTGACGACG	K2S3NT	ERS1815284 (SAMEA104156266)	NA	2015-08-11	Gooose_South	3	Blade	culture	tryptone_marine	186	mid	NA	7	F11	NA	NA	15.7	47923	31.33	8.1	7	763.4	K2S3NT
GS.Blade.top.culture.K4S3NA	ACTAAGTACCCG	K4S3NA	ERS1815285 (SAMEA104156267)	NA	2015-08-11	Gooose_South	3	Blade	culture	alginate_marine	203	mid	NA	7	F12	NA	NA	15.7	47923	31.33	8.1	7	763.4	K4S3NA
GS.Blade.top.culture.K4S3NT	GAGAAGCTTATA	K4S3NT	ERS1815286 (SAMEA104156268)	NA	2015-08-11	Gooose_South	3	Blade	culture	tryptone_marine	203	mid	NA	7	H11	NA	NA	15.7	47923	31.33	8.1	7	763.4	K4S3NT
GS.Blade.top.culture.K5S3NA	CTCAGCGGGACG	K5S3NA	ERS1815287 (SAMEA104156269)	NA	2015-08-11	Gooose_South	3	Blade	culture	alginate_marine	181	mid	NA	7	G12	NA	NA	15.7	47923	31.33	8.1	7	763.4	K5S3NA
GS.Blade.top.culture.K5S3NT	GCTGCGTATACC	K5S3NT	ERS1815288 (SAMEA104156270)	NA	2015-08-11	Gooose_South	3	Blade	culture	tryptone_marine	181	mid	NA	7	G11	NA	NA	15.7	47923	31.33	8.1	7	763.4	K5S3NT
GS.Water.top.culture.WS3NA	GGCGTAACGGCA	WS3NA	ERS1815289 (SAMEA104156271)	NA	2015-08-11	Gooose_South	3	Water	culture	alginate_marine	NA	top	NA	7	A12	NA	NA	15.7	47923	31.33	8.1	8	763.4	WS3NA
GS.Water.top.culture.WS3NT	CGCGCAAGTATT	WS3NT	ERS1815290 (SAMEA104156272)	NA	2015-08-11	Gooose_South	3	Water	culture	tryptone_marine	NA	top	NA	7	B11	NA	NA	15.7	47923	31.33	8.1	8	763.4	WS3NT
