# Supplementary material for: Diverse Bacteria Utilize Alginate Within the Microbiome of the Giant Kelp Macrocystis pyrifera
Source: Front Microbiol. 2018 Aug 20;9:1914. doi: 10.3389/fmicb.2018.01914 (PMC6110156; doi:10.3389/fmicb.2018.01914)
Supplement: Supplementary file 7 [file Data_Sheet_4.CSV]

OTU_ID	GS.Blade.bottom.52	GS.Blade.bottom.54	GS.Blade.bottom.55	GS.Blade.bottom.59	GS.Blade.bottom.60	GS.Blade.mid.51	GS.Blade.mid.53	GS.Blade.mid.56	GS.Blade.mid.57	GS.Blade.mid.58	GS.Blade.top.61	GS.Blade.top.62	GS.Blade.top.63	GS.Blade.top.64	GS.Blade.top.65	GS.Water.bottom.in.69	GS.Water.bottom.in.71	GS.Water.bottom.in.73	GS.Water.bottom.out.78	GS.Water.bottom.out.79	GS.Water.surface.in.67	GS.Water.surface.in.68	GS.Water.surface.out.75	GS.Water.surface.out.76	TB.Blade.top.culture.K1S2NA	TB.Blade.top.culture.K1S2NT	GS.Blade.top.culture.K2S3NA	GS.Blade.top.culture.K2S3NT	ST.Blade.top.culture.K3S1NA	ST.Blade.top.culture.K3S1NT	TB.Blade.top.culture.K3S2NA	TB.Blade.top.culture.K3S2NT	ST.Blade.top.culture.K4S1NA	ST.Blade.top.culture.K4S1NT	TB.Blade.top.culture.K4S2NA	TB.Blade.top.culture.K4S2NT	GS.Blade.top.culture.K4S3NA	GS.Blade.top.culture.K4S3NT	ST.Blade.top.culture.K5S1NA	ST.Blade.top.culture.K5S1NT	GS.Blade.top.culture.K5S3NA	GS.Blade.top.culture.K5S3NT	ST.Blade.bottom.10	ST.Blade.bottom.2	ST.Blade.bottom.3	ST.Blade.bottom.7	ST.Blade.bottom.8	ST.Blade.mid.1	ST.Blade.mid.4
22007	28	3	3	12	7	1	0	11	4	10	3	9	0	4	5	12	81	38	22	18	190	30	27	496	0	0	0	0	0	0	0	0	0	0	0	0	0	0	0	0	0	0	0	4	0	0	1	1	0
22008	20	11	6	4	4	0	0	11	2	7	0	0	3	1	1	7	47	18	7	15	129	11	17	303	0	0	0	0	0	0	0	0	0	0	0	0	0	0	0	0	0	0	0	0	6	4	10	0	0
16472	13	0	0	14	2	0	0	6	0	6	0	4	0	2	3	7	62	27	8	23	94	39	20	266	0	0	0	0	0	0	0	0	0	0	0	0	0	0	0	0	0	0	0	0	0	3	0	0	0
11923	56	82	320	85	2	0	0	0	0	0	0	24	0	1	0	0	0	0	0	0	0	0	0	0	0	0	0	0	0	0	0	0	0	0	0	0	0	0	0	0	0	0	3	1	2	17	5	0	0
6712	13	2	34	196	6	0	0	0	7	1	0	7	4	0	0	0	0	1	0	0	0	3	1	1	0	0	0	0	0	0	0	2	0	0	0	0	0	1	0	0	0	0	8	4	3	0	100	0	0
5163	2488	345	329	2957	1349	0	0	0	1	0	0	10	0	3	0	0	0	0	0	1	1	0	0	0	0	0	0	0	0	0	0	0	0	0	0	0	0	0	0	0	0	0	1142	1668	242	20	887	3	0
5168	626	135	220	408	246	0	0	1	0	0	0	2	2	2	0	0	0	0	0	0	0	0	2	0	0	0	0	0	0	0	0	0	0	0	0	0	0	0	0	0	0	0	16	115	42	1	188	6	0
5164	170	20	99	417	22	0	0	0	0	0	0	0	0	0	0	0	0	0	0	1	0	0	0	0	0	0	0	0	0	0	0	0	0	0	0	0	1	0	0	0	0	0	1	38	20	0	145	0	0
5162	272	86	36	135	47	0	0	1	2	1	0	26	2	1	4	1	2	0	0	0	0	0	2	1	0	0	0	0	0	1	0	0	0	0	0	0	0	0	0	0	0	1	15	10	30	16	55	0	0
14734	26	0	301	508	1	0	0	0	0	0	0	0	3	0	0	0	0	0	0	0	0	0	0	0	0	0	0	0	0	0	0	0	0	0	0	0	0	0	0	0	0	0	6	17	24	0	21	0	0
14733	62	14	140	329	12	0	0	0	0	0	0	0	0	0	0	0	1	0	0	0	0	0	0	0	0	0	0	1	0	0	0	0	0	0	0	0	0	0	0	0	0	0	6	10	7	0	18	0	0
5294	53	20	16	33	10	0	1	0	3	0	0	20	19	0	2	0	10	1	0	2	0	3	1	2	0	0	0	0	0	0	0	19	0	0	1	0	0	1	0	0	0	0	517	53	470	23	230	0	1
22746	103	22	24	61	33	1	18	38	15	51	6	43	20	23	47	923	2424	4850	1714	3048	3912	1834	6333	6585	0	0	0	0	0	0	0	0	0	0	0	0	0	1	0	0	0	0	3	2	17	13	5	0	2
22752	5	0	0	1	0	0	0	4	0	1	0	0	1	1	0	23	53	133	35	84	89	51	164	195	0	0	0	0	0	0	0	0	0	0	0	0	0	0	0	0	0	0	0	0	0	0	0	0	0
14869	4	0	0	0	2	0	1	1	0	1	1	1	2	0	0	30	52	142	40	81	98	45	166	162	0	0	0	0	0	0	0	0	0	0	0	0	0	0	0	0	0	0	0	0	0	2	0	0	0
14786	95	22	370	925	17	0	0	0	0	1	0	3	0	0	1	0	0	0	0	0	0	0	0	0	0	0	0	0	0	0	0	0	0	0	0	0	0	0	0	0	0	0	93	86	252	0	425	1	0
14790	40	4	25	257	2	0	0	0	0	0	0	1	4	0	0	20	60	61	46	108	15	17	100	7	0	0	0	0	0	0	0	0	0	0	0	0	0	0	0	0	0	0	4	0	0	2	16	1	0
19596	1	0	0	5	0	0	0	0	0	2	0	1	0	0	1	29	82	164	66	155	35	68	135	41	0	0	0	0	0	0	0	0	0	0	0	0	0	0	0	0	0	0	0	0	0	3	0	0	0
19600	5	3	2	3	0	0	0	0	2	0	0	2	0	0	1	52	166	283	62	240	160	145	311	188	0	0	0	0	0	0	0	0	0	0	0	0	0	1	0	0	0	0	0	0	0	3	0	0	0
25097	0	0	0	0	0	0	0	0	3	0	0	0	0	0	1	24	74	123	57	139	82	64	149	75	0	0	0	0	0	0	0	0	0	0	0	0	0	0	0	0	0	0	0	0	1	0	0	0	0
25099	0	0	0	3	0	0	0	0	0	0	0	0	0	0	0	4	15	38	20	47	30	18	26	16	0	0	0	0	0	0	0	0	0	0	0	0	0	0	0	0	0	0	0	0	0	0	1	0	0
8810	0	0	0	0	0	0	0	0	0	0	0	0	0	0	1	0	0	13	0	1	0	9	1	1	0	0	0	0	0	0	0	0	0	0	2	0	0	0	0	0	0	0	0	0	0	0	0	0	0
1941	25	1	10	15	1	1	0	5	34	2	0	43	14	8	8	31	156	166	40	87	128	113	163	191	0	0	0	0	0	0	0	0	0	0	0	0	0	0	0	0	0	0	1	1	14	3	5	0	0
62	131	15	265	534	3	0	0	0	3	0	0	23	3	0	5	0	0	0	0	0	0	0	1	1	0	0	0	0	0	0	0	0	0	0	0	0	0	0	0	0	0	0	165	82	47	3	640	14	0
26035	3699	374	405	3681	316	0	0	0	33	9	0	10414	319	2	9	0	2	2	0	0	0	0	1	3	0	0	0	0	0	0	0	0	0	0	0	0	0	0	0	0	0	0	45	1883	303	5678	657	22	0
17227	438	86	1407	123	33	1	4	8	898	37	0	3402	284	4	55	1	2	2	1	1	0	0	4	2	0	0	0	0	0	0	0	5	0	0	0	0	0	0	0	0	0	0	5	67	57	550	149	19	27
7426	514	162	1690	672	1346	0	0	3	5	1	0	159	3	12	10	3	0	0	0	1	1	0	0	3	0	0	0	0	0	0	0	0	0	0	0	0	0	1	0	0	0	0	85	118	1055	78	8399	2	2
14258	34	9	14	50	1	0	0	3	21	6	0	38	27	5	31	445	1459	3015	539	1435	1017	1043	2029	943	0	0	0	0	0	0	0	0	0	0	0	0	0	0	0	0	0	0	4	2	18	21	6	0	0
12468	2615	142	832	897	7	0	19	0	3	8	0	244	1	3	4	0	0	0	0	0	1	0	0	0	0	0	0	0	0	0	0	0	0	0	0	0	0	0	0	0	0	0	125	355	319	1305	470	0	0
3103	96	0	111	77	4	0	0	7	143	17	0	544	107	6	19	1	0	0	0	0	0	0	0	0	0	0	0	0	0	0	0	0	0	0	0	0	0	0	0	0	0	0	777	143	1374	412	269	0	5
2730	367	80	173	166	61	0	0	1	52	16	0	96	33	6	14	0	0	0	0	0	0	0	0	0	0	0	0	0	0	0	0	0	0	0	0	0	0	0	0	0	0	0	89	137	126	69	1455	34	0
11680	334	5	621	3491	53	1	1	0	0	0	0	0	0	1	0	0	0	1	0	0	0	0	0	0	0	0	0	0	0	0	0	0	0	0	0	0	0	0	0	0	0	0	88	74	201	11	339	1	0
5626	697	55	361	444	139	0	0	0	0	0	0	5	16	2	0	0	0	0	1	0	0	0	2	2	0	0	0	0	0	0	0	0	0	0	0	0	0	0	0	0	0	0	180	464	494	19	1179	31	0
3504	729	114	441	759	1311	0	0	0	0	0	0	11	6	0	6	0	0	0	1	2	2	0	0	0	0	0	0	0	0	0	0	1	0	0	0	0	0	0	0	0	0	0	4	324	95	11	1127	33	0
3503	16	0	22	5	7	0	9	5	18	37	10	299	63	38	24	0	0	0	1	0	0	2	0	1	0	0	0	0	0	0	0	0	0	0	0	0	0	0	0	0	0	0	1	0	0	55	43	0	4
17305	316	36	958	523	181	0	5	0	2	0	0	456	0	1	10	0	0	0	1	0	0	0	0	1	0	0	0	0	0	0	0	0	0	0	0	0	0	0	0	0	0	0	62	36	119	295	158	38	0
5630	526	4	182	266	0	0	0	0	2	0	0	11	0	0	0	1	0	0	0	0	0	0	0	0	0	0	0	0	0	0	0	0	0	0	0	0	0	0	0	0	0	0	300	230	470	14	1282	3	0
14261	211	29	71	264	3	0	0	0	19	18	0	2218	330	8	53	0	0	0	0	0	0	0	0	0	0	0	0	0	0	0	0	0	0	0	0	0	0	0	0	0	0	0	166	17	160	7	62	0	1
11681	14	15	14	88	7	0	0	0	491	0	0	19	30	0	1	0	0	0	0	0	0	4	2	2	0	0	0	0	1	0	0	0	0	0	0	0	0	0	0	0	0	0	19	130	60	16	9	0	0
2742	56	12	85	656	24	0	0	0	2	0	0	2	0	0	0	0	0	0	0	0	0	0	0	1	0	0	0	0	0	0	0	0	0	0	0	0	0	0	0	0	0	0	59	356	506	14	881	13	0
14326	55	10	19	333	0	0	0	1	0	0	0	27	4	0	0	0	0	0	0	0	0	0	0	0	0	0	0	0	0	0	0	0	0	0	0	0	0	0	0	0	0	0	25	6	230	5	68	0	0
14260	145	26	257	131	27	0	0	0	0	0	0	4	0	1	0	0	0	0	0	0	0	0	0	0	0	0	0	0	0	0	0	0	0	0	0	0	0	0	0	0	0	0	10	13	69	2	1036	27	0
21982	976	11	134	552	5	0	0	0	0	17	0	61	3	0	4	0	0	0	0	0	0	0	0	2	0	0	0	0	0	0	0	0	0	0	0	0	0	0	0	0	0	0	83	373	124	77	180	0	0
3505	175	23	147	23	6	0	0	0	3	9	0	229	93	54	32	0	1	0	0	0	0	1	0	1	0	0	0	0	0	0	0	0	0	0	0	0	0	0	0	0	0	0	0	1	4	61	59	3	0
14325	94	9	11	117	3	0	0	0	0	1	0	263	11	0	0	0	0	0	0	0	0	0	0	1	0	0	0	0	0	0	0	0	0	0	0	0	0	0	0	0	0	0	1	55	7	124	10	1	0
2148	298	32	206	608	50	0	0	0	0	0	0	0	0	1	0	0	0	0	0	0	2	0	0	0	0	0	0	0	0	0	0	0	0	0	0	0	0	0	0	0	0	0	123	121	195	0	510	7	0
15144	561	123	190	141	177	0	0	0	19	0	0	106	24	2	4	0	0	0	0	0	0	0	0	0	0	0	0	0	0	0	0	0	0	0	0	0	0	0	0	0	0	0	4	90	0	117	298	127	0
2762	16	6	16	18	4	0	0	3	54	0	0	93	83	21	12	0	1	0	0	0	0	0	0	0	0	0	0	0	0	0	0	0	0	0	0	0	0	0	0	0	0	0	30	28	192	6	87	0	0
14324	110	18	15	126	7	0	0	0	1	0	0	331	11	0	1	0	0	0	0	0	1	0	0	0	0	0	0	0	0	0	0	0	0	0	0	0	0	0	0	0	0	0	1	60	10	177	27	1	0
7677	89	0	101	472	4	0	0	0	0	0	0	1	1	0	0	0	0	0	0	0	0	1	1	0	0	0	0	0	0	0	0	0	0	0	0	0	0	0	0	0	0	0	3	7	8	0	286	5	0
2325	0	0	0	1724	1	0	0	0	0	0	0	0	0	0	0	0	0	0	0	0	0	0	0	0	0	0	0	0	0	0	0	0	0	0	0	0	0	0	0	0	0	0	0	0	0	0	0	0	0
17316	68	0	150	107	89	0	0	0	0	0	0	5	5	0	0	0	4	1	0	2	1	0	0	1	0	0	0	0	0	0	0	0	0	0	0	0	0	0	0	0	0	0	0	45	8	1	484	84	0
14259	4	7	22	21	3	0	0	1	1	0	0	13	47	1	2	24	59	168	24	67	50	63	89	55	0	0	0	0	0	0	0	6	0	0	0	0	0	0	0	0	0	0	3	3	2	11	508	3	0
14329	83	12	10	96	6	0	0	0	1	0	0	240	4	0	1	0	0	0	0	0	0	0	0	0	0	0	0	0	0	0	0	0	0	0	0	0	0	0	0	0	0	0	4	43	11	147	14	0	0
2743	21	0	73	103	11	0	0	0	0	1	0	0	5	0	0	0	0	0	0	0	2	0	0	0	0	0	0	0	1	0	0	22	0	0	0	0	0	0	0	0	0	0	0	3	1	0	42	2	0
17309	91	2	76	89	26	0	0	0	0	0	0	128	2	0	0	0	0	1	0	0	0	0	0	0	0	0	0	0	0	0	0	0	0	0	0	0	0	0	0	0	0	0	0	1	1	37	452	12	0
12652	187	10	137	48	3	0	0	0	0	3	0	23	0	0	0	1	0	0	0	0	0	0	1	0	0	0	0	0	0	0	0	0	0	0	0	0	0	0	0	0	0	0	0	79	2	0	321	2	0
15150	104	23	144	75	151	0	0	0	1	0	0	14	0	0	1	0	0	0	0	0	0	0	0	1	0	0	0	0	0	0	0	0	0	0	0	0	0	0	0	0	0	0	9	89	0	204	231	28	0
12658	14	17	8	18	2	0	0	0	64	1	0	79	47	3	9	2	34	28	13	59	62	42	24	35	0	0	0	0	0	0	0	1	0	0	0	0	0	0	0	0	0	0	12	22	43	38	79	1	0
4503	5	0	2	16	0	0	0	0	0	0	0	3	1	0	0	1	0	0	0	0	0	0	3	0	0	0	0	0	0	0	0	0	0	0	0	0	0	0	0	0	0	0	0	0	5	0	3	0	0
11688	0	0	0	1	0	0	0	0	4	0	0	8	0	0	0	0	0	0	0	0	0	0	0	0	0	0	0	0	0	0	0	0	0	0	0	0	0	0	0	0	0	0	812	32	133	13	6	0	0
17307	8	0	106	59	44	0	0	0	0	0	0	1	0	0	0	0	0	0	0	0	0	0	0	0	0	0	0	0	0	0	0	0	0	0	0	0	0	0	0	0	0	0	4	3	14	2	724	33	0
7432	59	7	131	149	161	0	0	0	0	0	8	4	10	1	0	0	0	0	2	0	0	0	0	0	0	0	0	1	0	0	0	1	0	0	0	0	0	0	0	0	0	0	0	2	0	1	290	0	0
6291	44	0	53	263	0	0	0	0	1	0	0	8	4	1	0	0	0	0	0	0	0	0	0	0	0	0	0	0	0	0	0	0	0	0	0	0	0	0	0	0	1	0	1	0	1	2	2	0	0
2310	34	4	53	466	2	0	0	0	0	0	0	1	6	2	0	2	0	0	0	0	0	0	0	0	0	0	0	0	0	0	0	2	0	0	0	0	0	0	0	0	0	0	3	5	1	0	141	0	0
22515	61	10	7	207	2	0	0	0	0	0	0	153	16	0	0	0	0	0	0	0	0	0	0	0	0	0	0	0	0	0	0	0	0	0	0	0	0	0	0	0	0	0	0	7	1	262	1	0	0
17231	16	4	46	9	1	0	0	0	38	3	0	136	10	0	1	0	0	0	0	0	0	0	0	1	0	0	0	0	0	0	0	0	0	0	0	0	0	0	0	0	0	0	1	9	5	20	5	1	3
7646	199	0	140	205	0	0	0	0	0	0	0	0	6	0	0	0	0	0	0	0	0	0	1	0	0	0	0	0	0	0	0	0	0	0	0	0	0	0	0	0	0	0	0	0	0	0	4	0	0
17314	42	0	13	24	28	0	0	0	0	0	0	23	1	0	1	0	0	0	0	0	0	0	0	0	0	0	0	0	0	0	0	0	0	0	0	0	0	0	0	0	0	0	0	65	0	44	426	12	0
4971	272	10	37	107	0	0	0	1	0	0	0	0	2	0	0	0	0	0	0	0	0	0	0	0	0	0	0	0	0	0	0	0	0	0	0	0	0	0	0	0	0	0	0	0	0	0	10	0	0
5639	0	0	8	12	0	0	0	0	0	0	0	2	3	1	0	0	0	0	0	0	0	0	0	0	0	0	0	0	0	0	0	1	0	0	0	0	0	0	0	0	0	0	0	13	5	0	602	2	0
26034	17	1	1	32	1	0	0	0	1	0	0	76	3	0	0	0	0	0	0	1	0	0	0	0	0	0	0	0	0	0	0	0	0	0	0	0	0	0	0	0	0	0	3	6	2	27	5	0	0
2777	19	3	0	9	3	0	0	0	12	2	0	23	27	0	3	19	9	80	12	48	53	15	42	39	0	0	0	0	0	0	0	0	0	0	0	0	0	0	0	0	0	0	2	5	10	14	33	0	0
12470	27	7	213	297	0	0	0	0	0	0	0	10	0	0	0	0	0	0	0	0	0	0	0	0	0	0	0	0	0	0	0	0	0	0	0	0	0	0	0	0	0	0	0	1	0	0	22	0	0
21983	9	2	24	12	4	0	0	0	7	0	0	42	55	2	7	0	1	2	0	1	1	0	0	0	0	0	0	0	0	0	0	12	0	0	0	0	0	0	0	0	0	0	1	11	44	2	203	0	2
7629	219	7	21	75	5	0	0	0	0	0	0	7	5	0	1	0	0	0	0	0	0	0	0	0	0	0	0	0	0	0	0	0	0	0	0	0	0	0	0	0	0	0	0	15	7	1	8	0	0
5643	0	0	18	232	0	0	0	0	0	0	0	0	0	0	0	0	0	0	0	0	0	0	0	0	0	0	0	0	0	0	0	0	0	0	0	0	0	0	0	0	0	0	238	0	164	0	0	0	0
14484	66	0	63	48	0	0	0	0	0	0	0	1	0	0	0	0	0	0	0	0	0	0	0	0	0	0	0	0	0	0	0	0	0	0	0	0	0	0	0	0	0	0	0	2	0	1	109	0	0
17234	15	1	35	2	1	0	0	0	21	1	0	96	7	0	1	0	0	1	0	0	0	0	0	0	0	0	0	0	0	0	0	0	0	0	0	0	0	0	0	0	0	0	0	1	1	17	4	1	4
12350	74	11	13	45	5	0	0	0	0	0	0	26	0	0	0	0	0	0	0	0	0	0	1	1	0	0	0	0	0	0	0	0	0	0	0	0	0	0	0	0	0	0	1	5	0	2	270	0	0
17232	12	0	28	5	1	0	0	0	27	0	0	73	7	0	3	0	0	0	0	0	0	0	0	0	0	0	0	0	0	0	0	0	0	0	0	0	0	0	0	0	0	0	0	1	2	18	3	0	0
12351	59	1	65	23	7	0	0	0	0	0	0	2	0	0	0	0	0	0	0	0	0	0	0	0	0	0	0	0	0	0	0	0	0	0	0	0	0	0	0	0	0	0	0	23	0	0	186	17	0
14482	22	0	18	13	0	0	0	0	0	2	0	13	3	1	6	0	0	0	0	0	0	0	0	0	0	0	0	0	0	0	0	0	0	0	0	0	0	0	0	0	0	0	0	5	0	0	139	1	0
26040	15	0	6	16	1	0	0	0	0	0	0	44	0	0	0	0	0	0	0	0	0	0	0	0	0	0	0	0	0	0	0	0	0	0	0	0	0	0	0	0	0	0	0	2	1	21	4	0	0
101	0	0	0	0	0	0	0	0	70	0	0	3	6	0	0	0	0	0	0	0	0	0	0	0	0	0	0	0	0	0	0	0	0	0	0	0	0	0	0	0	0	0	0	1	3	4	0	0	0
20885	0	3	0	7	2	1	0	1	12	0	2	85	171	1	2	0	4	0	0	0	0	0	1	0	0	0	0	0	0	0	0	6	0	0	0	0	0	0	0	0	0	0	0	0	3	8	0	0	0
10245	62	16	24	31	31	0	0	0	9	0	0	57	33	0	4	0	0	1	1	0	0	0	2	0	0	0	0	0	0	0	0	1	0	0	1	0	0	0	0	0	0	0	5	11	25	17	69	0	0
21060	0	0	0	0	6	0	0	1	0	0	0	2	1	0	0	0	1	0	0	0	0	0	3	0	0	0	0	0	0	0	0	2	0	0	0	0	0	0	0	0	0	0	1	3	22	0	32	24	0
21061	3	0	17	1	1	0	0	0	1	0	0	8	4	0	0	1	3	0	0	0	0	14	1	0	0	0	0	0	0	1	0	23	0	0	0	0	0	0	0	0	0	0	0	4	0	0	12	2	0
88	0	0	997	0	0	0	0	0	0	0	0	0	0	0	0	0	0	0	0	0	0	0	0	0	0	0	0	0	0	0	0	0	0	0	0	0	0	0	0	0	0	0	0	0	0	0	0	0	0
5172	53	8	101	14	4	0	0	2	16	2	0	23	19	9	8	0	0	0	0	0	0	0	0	0	0	0	0	0	0	0	0	6	0	0	0	0	0	0	0	0	0	0	12	10	21	1	4	0	0
2952	3	5	4	5	0	0	0	0	2	0	0	38	1	9	2	0	0	0	0	0	0	0	0	0	0	0	0	0	0	0	0	0	0	0	0	0	0	0	0	0	0	0	11	8	69	2	146	0	0
2943	2	0	0	0	0	0	0	0	0	0	0	2	0	0	1	0	0	0	0	0	0	0	0	0	0	0	0	0	0	0	0	0	0	0	0	0	0	0	0	0	0	0	0	3	18	0	461	0	0
6145	4	1	0	7	1	0	0	0	848	0	1	1	11	4	1	0	1	0	0	0	0	0	1	0	0	0	0	0	0	0	0	0	0	0	0	0	0	0	0	0	0	0	30	168	29	8	18	0	0
165	0	0	0	0	0	1	0	0	15	0	0	0	0	0	0	0	0	0	0	0	0	0	0	0	0	0	0	0	0	0	24	0	84	0	6	0	0	0	65	0	0	0	0	13	17	0	7	1	1
11918	352	58	57	316	11	0	0	0	2	1	0	66	3	5	1	0	0	0	0	1	0	0	0	0	0	0	0	0	0	0	0	0	0	0	0	0	0	0	0	0	0	0	15	13	52	91	73	1	0
1412	37	67	9	35	19	0	0	2	0	0	1	0	1	2	3	0	0	0	0	1	0	0	0	0	0	0	0	0	0	0	0	0	0	0	0	0	0	0	0	0	0	0	31	114	93	1	29	0	0
3353	148	34	5	28	3	0	2	2	4	0	1	88	0	0	0	0	0	0	0	0	0	0	0	0	0	0	0	0	0	0	0	0	0	0	0	0	0	0	0	0	0	0	2299	335	428	8	10	0	0
11729	17	12	118	12	5	0	0	2	0	0	0	1	0	0	0	0	0	0	0	0	0	0	0	0	0	0	0	0	0	0	0	0	0	0	0	0	0	0	0	0	0	0	2	5	1	2	16	1	2628
4778	5	1	0	2	1	0	0	2	2	1	0	4	1	0	3	30	69	116	28	68	74	34	71	164	0	0	0	0	0	0	0	0	0	0	0	0	0	0	0	0	0	0	0	0	0	0	0	0	0
6293	3	3	0	2	0	0	0	2	2	0	0	2	18	0	3	25	91	162	32	66	39	71	182	93	1	0	0	0	0	0	0	0	0	0	0	0	0	0	0	0	0	0	0	0	0	0	0	0	0
6003	3	7	0	0	2	0	0	0	0	0	0	11	10	0	2	12	70	98	26	41	40	57	149	62	1	0	0	0	0	0	0	0	0	0	0	0	0	1	0	0	0	0	0	0	1	11	5	0	0
11731	1	41	1	5	9	0	0	1	0	0	0	0	0	0	1	0	0	1	0	0	0	0	0	0	0	0	0	0	0	0	0	0	0	0	0	0	0	0	0	0	0	0	252	136	45	4	286	0	5
24035	8	0	0	0	1	0	12	0	2	3	0	0	0	0	0	12	69	80	14	18	23	45	38	83	0	0	0	0	0	0	0	0	0	0	0	0	0	0	0	0	0	0	0	0	0	0	0	0	0
22657	84	11	7	27	13	0	1	8	2	15	5	32	22	16	42	1093	4707	8262	710	1708	3616	4146	3673	5627	0	0	0	0	0	0	0	0	0	0	0	0	0	0	0	0	0	0	1	1	2	4	0	0	1
22411	17	4	2	20	4	0	7	9	3	5	4	42	4	5	18	439	2022	3632	312	722	1467	1991	2034	2308	0	0	0	0	0	0	0	0	0	0	0	1	0	2	0	0	0	0	1	0	13	4	0	0	0
1194	18	0	8	108	3	0	0	0	0	0	0	0	0	0	0	0	0	0	0	0	0	1	0	0	0	0	0	0	0	0	0	0	0	0	0	0	0	0	0	0	0	0	14	8	19	0	0	0	0
10954	53	18	4	29	2	0	0	0	0	0	0	0	3	2	0	0	0	0	0	0	1	0	0	0	0	0	0	0	0	0	0	0	0	0	0	0	0	0	0	0	0	0	350	558	1203	4	516	0	0
7621	17	6	2	7	0	0	0	2	9	4	2	13	11	2	3	49	286	412	66	160	117	172	154	279	0	0	0	0	0	0	0	0	0	0	0	0	0	0	0	0	0	0	1	0	13	19	4	0	0
11736	205	187	128	205	241	0	0	0	6	2	0	22	0	0	0	0	0	0	0	0	1	0	0	0	0	0	0	0	0	0	0	0	0	0	0	0	0	0	0	0	0	0	13	128	153	69	365	0	0
14603	6	0	0	0	0	0	0	0	1	0	0	3	0	0	0	25	182	231	26	61	86	128	88	158	0	0	0	0	0	0	0	0	0	0	0	0	0	0	0	0	0	0	0	0	0	0	0	0	0
17580	4	1	0	3	2	0	0	0	0	0	0	1	3	2	3	36	124	148	35	98	106	148	74	220	0	0	0	0	0	0	0	0	0	0	0	0	0	0	0	0	0	0	0	0	0	1	0	0	0
22659	1	0	0	2	0	0	0	0	0	0	0	1	2	2	0	37	127	216	22	37	94	127	87	157	0	0	0	0	0	0	0	0	0	0	0	0	0	0	0	0	0	0	0	0	0	0	0	0	0
14597	4	0	0	2	0	0	0	0	0	0	1	0	0	0	2	32	110	215	16	50	61	114	84	132	0	0	0	0	0	0	0	0	0	0	0	0	0	0	0	0	0	0	0	0	0	0	0	0	0
22413	1	0	0	0	0	0	0	0	0	1	0	1	0	0	0	15	52	91	7	17	44	37	67	74	0	0	0	0	0	0	0	0	0	0	0	0	0	0	0	0	0	0	0	0	0	0	0	0	0
17581	0	0	0	1	0	0	0	0	0	0	0	3	0	0	2	6	57	61	10	25	34	66	20	65	0	0	0	0	0	0	0	0	0	0	0	0	0	0	0	0	0	0	0	0	5	2	0	0	0
22412	0	0	0	0	0	0	1	0	0	0	0	0	0	0	0	15	36	79	10	20	31	46	59	75	0	0	0	0	0	0	0	0	0	0	0	0	0	0	0	0	0	0	0	0	0	0	0	0	0
12201	0	4	311	6	2	0	0	1	1	0	0	0	1	1	0	0	0	0	0	0	0	0	0	0	0	0	0	0	0	0	0	0	0	0	0	0	0	0	0	0	0	0	0	1	0	5	9	2	0
12200	25	16	24	472	1	0	0	0	0	0	0	1	0	0	0	0	0	0	0	0	0	0	0	0	0	0	0	0	0	0	0	0	0	0	0	0	0	0	0	0	0	0	0	5	0	0	19	0	0
23950	36	8	8	24	4	0	0	5	19	3	0	32	22	0	8	162	615	1040	99	567	426	419	744	345	0	0	0	0	0	0	0	0	0	0	0	0	0	0	0	0	0	0	2	4	0	2	0	1	0
23953	3	0	1	0	0	0	0	2	2	1	0	6	1	0	2	26	77	156	19	110	65	50	164	18	0	0	0	0	0	0	0	0	0	0	0	0	0	0	0	0	0	0	1	0	0	0	0	0	0
7671	6	2	0	17	0	0	0	4	0	0	0	13	4	0	1	23	39	70	18	109	26	39	108	36	0	0	0	0	0	0	0	0	0	0	0	0	0	0	0	0	0	0	0	0	0	0	0	0	0
15391	0	0	0	0	0	0	0	0	0	0	0	0	0	0	0	0	0	1	0	0	0	0	0	1	0	0	0	0	0	0	0	0	0	18378	0	0	0	0	0	0	0	0	0	0	0	1	0	0	0
19235	0	0	1	0	0	0	0	0	3	0	0	0	0	0	0	0	0	0	0	0	0	0	0	1	0	0	0	0	0	0	0	0	0	0	0	0	0	0	0	0	0	0	0	0	0	1	0	0	0
6450	0	0	0	0	0	0	0	0	1	0	0	0	0	0	0	0	0	0	0	0	0	0	0	0	0	0	0	0	0	0	0	0	0	0	1682	0	0	0	3	0	0	0	0	0	0	0	0	0	0
22818	8	22	3	63	7	0	0	2	7	0	0	143	726	5	3	2	1	2	0	0	1	2	5	2	0	0	0	0	0	0	0	1	0	0	0	0	0	0	0	0	0	0	2	4	17	19	3	0	0
6277	0	0	7	20	1	0	0	0	0	0	0	3	2	0	0	0	0	0	0	0	2	0	0	0	0	0	0	0	0	0	0	0	0	0	0	0	0	0	0	0	0	0	0	2	957	4	0	0	0
6279	0	4	0	7	0	0	0	0	2	0	0	50	346	0	0	0	0	0	0	2	0	0	2	0	0	0	0	0	0	0	0	0	0	0	0	0	0	0	1	0	0	0	0	0	0	3	1	0	0
15393	0	0	0	0	0	0	0	0	0	0	0	0	0	0	0	0	0	0	0	0	0	0	0	0	0	0	0	0	0	0	0	0	0	577	0	0	0	0	0	1	0	0	0	0	0	0	0	0	0
15327	0	0	0	0	0	0	0	0	0	0	0	0	2	0	0	0	0	0	0	0	0	0	0	0	0	0	4	0	0	0	0	0	0	0	0	0	0	0	0	0	0	0	0	0	0	0	0	0	0
26790	341	150	152	307	41	1457	2009	10270	5198	16070	4457	3342	1274	44	10561	1	7	2	3	8	4	3	7	2	0	0	0	0	0	0	0	0	0	0	0	0	1	0	0	0	2	0	17	33	26	4698	93	2063	7700
15295	308	24290	43	93	191	0	1	11	44	0	0	17	42	7	7	2	7	3	1	2	0	1	1	3	0	0	0	0	0	0	0	0	0	0	0	0	0	0	0	0	0	0	490	35	26	734	245	1	1
25964	18	2	4	17	5	0	0	6	7	8	0	7	9	4	8	691	1836	2062	630	1546	1190	1184	1764	1570	0	0	0	0	0	0	0	0	0	0	0	0	0	0	0	0	0	0	0	4	3	2	3	1	0
13523	15	9	3	8	5	0	0	2	2	2	3	12	1	5	6	382	932	1338	336	612	762	900	1708	1234	0	0	0	1	0	0	0	0	0	0	0	1	2	0	0	0	0	0	1	1	14	9	15	1	1
22351	11	4	2	34	6	0	0	3	20	6	7	32	65	4	8	337	595	1924	645	1541	554	511	1771	701	0	0	0	1	0	0	1	0	0	0	0	0	0	0	0	0	0	0	1	1	5	12	5	0	0
15183	11	0	1	16	1	0	0	0	19	0	0	3	22	1	7	421	1184	1312	348	384	439	582	1069	698	0	0	0	0	0	0	0	0	0	0	0	0	1	0	0	0	0	1	0	1	15	20	5	0	0
22317	1	2	0	4	1	0	0	2	0	4	0	4	0	0	4	360	856	1527	394	579	573	750	929	696	0	0	0	0	0	0	0	0	0	0	0	0	0	0	0	0	0	0	0	0	3	1	0	1	1
15224	12	0	3	4	0	0	0	5	4	6	0	5	2	0	6	466	944	764	425	865	587	812	1374	639	0	0	0	0	1	0	0	0	0	0	0	0	0	0	0	0	0	0	0	0	2	1	0	0	0
15359	7	2	1	3	0	0	0	1	3	1	3	7	0	0	2	304	728	774	323	657	474	405	1172	444	1	1	0	1	0	1	0	0	0	0	0	0	0	0	0	0	0	1	0	2	12	1	0	0	0
17725	6	6	515	4	2	0	0	2	0	3	0	4	0	0	0	0	0	0	0	1	0	0	1	0	0	0	0	0	0	0	0	0	0	0	0	0	0	0	0	0	0	0	4	4	61	5	8	0	0
22356	8	1	2	18	2	0	0	1	10	0	3	31	34	4	5	237	565	1081	352	931	362	404	965	497	1	1	0	0	0	0	0	0	0	0	0	0	0	0	0	0	0	0	1	0	11	3	2	0	0
5436	8	0	0	11	2	0	0	1	7	5	1	3	2	1	10	214	383	699	227	600	381	381	689	295	0	0	0	0	0	0	0	0	0	0	0	0	0	0	0	0	0	0	0	0	1	1	0	0	0
22792	12	1	2	16	2	0	0	1	14	2	2	6	4	1	5	198	477	595	208	375	341	438	1030	367	0	0	0	0	0	207	0	0	0	0	0	0	0	0	0	0	0	0	0	0	2	3	0	0	1
15326	22	8	1	9	2	1	0	1	5	2	3	19	1	4	3	313	811	456	283	453	388	623	962	488	0	0	0	0	0	0	0	0	0	0	0	0	0	0	0	0	0	0	0	0	1	3	6	0	0
17723	10	1	1	2	0	0	0	0	3	1	1	9	4	1	3	141	303	592	65	178	461	649	809	784	0	0	0	1	0	0	0	0	0	0	0	0	0	0	0	0	0	0	0	1	0	0	0	0	0
14074	745	143	136	60	50	0	10	12	676	7	4	1168	153	5	2	0	3	0	0	2	0	0	1	1	0	0	0	0	0	0	0	0	0	0	0	0	0	0	0	0	0	0	8	2	29	41	60	9	1
6300	3	1	1	10	0	1	5	0	3	2	0	2	4	1	2	224	499	227	204	344	374	379	901	301	0	0	0	0	0	0	0	0	0	0	0	0	0	0	0	0	0	0	0	0	1	2	2	0	1
14152	31	52	9	35	15	0	1661	891	261	182	2	283	0	4	8	0	0	0	0	0	2	0	0	2	0	0	0	0	0	0	0	0	0	0	0	0	0	0	0	0	0	0	0	5	3	1	6	1	3
13798	8	2	0	35	1	0	0	3	18	0	0	16	25	1	5	115	116	554	256	645	108	171	565	85	0	0	0	0	1	1	0	0	0	0	0	0	0	0	0	0	0	0	6	5	29	26	6	0	0
14035	13	2	3	6	1	53	49	296	181	475	121	99	34	3	316	0	0	0	0	0	0	0	0	0	0	0	0	0	0	0	0	0	0	0	0	0	0	0	0	0	0	0	0	0	3	128	0	59	221
7640	22	4	0	6	0	0	1	1	2	4	2	25	3	7	16	68	140	133	60	97	240	414	498	894	0	0	0	0	0	0	0	0	0	0	0	0	0	0	0	0	0	0	3	0	4	2	0	0	1
22819	7	4	13	13	4	0	0	1	19	1	3	43	82	2	8	48	115	310	104	164	69	115	390	103	6	0	0	1	0	0	0	10	0	0	0	0	0	0	294	8	0	0	4	5	22	30	17	0	0
5832	3	1	0	3	0	0	0	3	0	0	5	4	3	0	3	181	438	696	171	236	228	422	357	326	0	0	0	0	1	0	0	0	1	0	0	0	0	0	0	0	0	0	0	1	0	4	3	0	0
14073	5	6	3	12	0	0	0	0	8	0	0	25	259	0	3	0	0	0	0	5	0	1	2	3	27	0	0	0	0	0	0	3171	0	0	0	41	0	0	0	3	0	3	0	0	0	36	0	0	0
22793	2	1	1	3	0	0	0	3	10	0	0	4	1	1	4	152	272	524	144	204	219	252	552	275	0	0	0	0	0	0	0	0	0	0	0	0	0	0	0	0	0	0	0	0	0	8	0	0	0
14033	12	2	1	9	0	34	45	245	144	411	88	85	21	3	251	0	0	0	0	1	0	0	0	0	0	0	0	0	0	0	0	0	0	0	0	0	0	0	0	0	0	0	0	0	0	114	2	34	195
19328	5	26	19	23	30	0	0	1	15	0	0	593	83	8	4	1	1	2	0	2	0	0	0	2	0	0	0	0	0	0	0	0	0	0	0	0	0	0	0	0	0	0	0	7	18	86	32	2	0
14031	8	2	4	9	1	31	26	154	104	378	98	52	17	1	203	0	1	0	0	1	0	0	0	0	0	0	0	0	0	0	0	0	0	0	0	0	0	0	0	0	0	0	1	2	3	96	1	41	163
13360	7	2	1	0	1	0	0	0	1	0	0	4	0	3	4	96	257	429	128	208	381	400	727	635	0	0	0	0	0	0	0	0	0	0	0	0	0	0	0	0	0	0	0	1	0	0	0	0	0
6270	11	2	179	33	455	0	0	1	7	0	0	32	40	5	7	0	0	10	1	0	8	1	2	2	0	0	0	0	0	0	0	0	0	0	0	0	0	0	0	0	0	0	0	13	5	12	1733	3	0
13486	4	0	0	5	1	0	0	1	0	2	0	1	0	1	3	147	300	366	126	252	171	191	253	300	0	0	0	0	0	0	0	1	0	0	0	0	0	0	0	0	0	0	0	0	0	2	0	0	0
22318	2	0	0	3	2	0	0	2	0	1	4	3	0	0	4	127	315	465	129	284	222	245	335	285	0	0	0	0	0	0	0	0	0	0	0	0	0	0	0	0	0	0	0	0	0	3	0	0	0
15267	16	104	13	136	159	1	18	5	26	0	6	80	933	1	5	0	12	9	8	3	2	3	13	8	0	0	0	0	0	25	0	0	0	0	0	0	13	0	0	0	0	0	7	26	47	38	93	2	1
22449	2	0	0	0	0	3	2	18	1005	32	6	20	8	0	17	0	1	0	0	0	0	0	0	0	0	0	0	0	0	0	0	0	0	0	0	0	0	0	0	0	0	0	0	1	0	9	0	4	18
6275	15	17	111	153	152	1	0	1	10	0	0	35	105	5	2	2	3	5	6	1	1	0	6	1	0	0	0	0	0	0	0	49	0	0	0	1	0	0	0	0	0	0	6	6	43	343	226	9	0
4956	3	0	2	3	0	0	0	0	0	0	0	12	12	0	2	73	98	317	87	285	94	86	304	139	0	0	0	0	0	1	0	0	0	0	0	0	0	0	0	0	0	0	0	1	0	0	0	0	0
15221	575	113	96	449	2	0	0	0	4	0	0	0	1	0	0	0	0	0	0	0	0	0	2	0	0	0	0	0	0	0	0	0	0	0	0	0	0	0	0	0	0	0	0	20	58	8	1	0	0
14034	2	1	3	4	0	26	10	72	62	186	43	38	15	0	99	0	1	0	0	0	0	0	0	0	0	0	0	0	0	0	0	0	0	0	0	0	0	0	0	0	0	0	0	1	0	56	2	16	70
15186	4	1	6	1	0	0	0	0	2	0	0	4	0	0	4	84	192	252	52	93	74	88	168	143	0	0	0	0	0	2	0	0	0	0	0	0	0	0	0	0	0	0	0	0	0	0	0	0	0
14072	6	9	15	4	7	0	5	594	6	0	1	18	79	1	1	2	2	4	0	0	1	0	1	0	0	0	0	0	0	0	0	0	0	0	0	0	0	0	0	0	0	0	0	4	9	15	7	10	7
26272	4	12	164	5	3	1	0	1	70	0	0	51	30	0	3	3	0	4	0	2	2	4	1	0	0	0	1	0	0	0	0	0	0	0	0	0	0	0	0	0	0	0	11	8	16	53	16	1	0
4963	0	35	0	0	12	0	0	1	0	0	0	0	0	0	1	0	0	0	0	0	0	0	0	0	0	0	0	0	0	0	0	0	0	0	0	0	0	0	0	0	0	0	2	0	1074	0	0	0	0
22445	4	1	1	1	0	8	17	64	29	110	23	20	5	0	64	0	0	0	0	0	0	0	0	0	0	0	0	0	0	0	0	0	0	0	0	0	0	0	0	0	0	0	0	1	0	29	1	9	30
13919	3	0	0	6	0	0	0	0	3	0	0	4	0	0	0	0	0	0	0	0	0	0	0	1	0	0	0	0	0	0	0	0	0	0	0	0	0	0	0	0	0	0	19	0	168	3	0	0	0
19330	16	7	9	22	3	2	0	1	31	0	0	38	170	1	2	2	3	2	1	4	3	0	2	3	0	0	0	0	0	0	0	0	0	0	0	0	0	0	0	0	0	0	4	10	24	25	55	5	0
22295	0	0	1	0	0	0	0	0	0	0	0	0	0	0	0	32	72	136	26	49	50	92	178	98	0	0	0	0	0	0	0	0	0	0	0	0	0	0	0	0	0	0	0	0	0	0	0	0	0
14032	2	1	1	3	0	7	9	60	29	75	25	21	6	0	52	0	0	0	0	0	0	0	0	0	0	0	0	0	0	0	0	0	0	0	0	0	0	0	0	0	0	0	0	0	1	26	1	12	31
25994	2	1	0	1	0	11	5	32	21	73	26	12	7	0	45	1	0	0	0	0	0	1	0	0	0	0	0	0	0	0	0	0	0	0	0	0	0	0	0	0	0	0	0	1	1	29	0	9	29
15294	13	670	0	3	0	0	0	0	0	0	0	0	1	0	0	0	0	0	0	0	0	0	0	0	0	0	0	0	0	0	0	0	0	0	0	0	0	0	0	0	0	0	15	3	2	16	14	0	0
26795	2	0	2	0	0	2	3	27	14	173	28	14	1	0	78	0	0	0	0	0	0	0	0	0	0	0	0	0	0	0	0	0	0	0	0	0	0	0	0	0	0	0	0	1	0	8	0	3	7
22452	0	1	0	12	0	0	0	2	0	624	18	3	0	0	1	0	0	0	0	0	0	0	0	0	0	0	0	0	0	0	0	0	0	0	0	0	0	0	0	0	0	0	0	0	0	0	0	0	0
6013	36	6	5	21	27	0	0	0	0	0	0	0	0	1	1	0	0	4	0	0	0	0	0	0	0	0	0	0	0	0	0	0	0	0	0	0	0	0	0	0	0	0	2	1	0	0	4	0	0
15298	5	522	0	3	5	0	0	0	3	0	0	0	3	0	1	0	1	0	0	0	0	0	0	0	0	0	0	0	0	0	0	0	0	0	0	0	0	0	0	0	0	0	17	0	1	14	6	0	0
26271	5	6	16	21	6	0	1	3	0	0	3	126	181	12	13	11	10	5	0	8	8	2	6	0	0	0	0	0	0	0	0	0	0	0	0	0	0	0	0	0	0	0	4	1	0	4	0	0	0
24000	0	0	0	0	0	0	0	0	0	0	0	0	0	0	0	1	0	0	0	0	0	0	0	1	0	0	0	0	0	0	0	0	0	0	0	0	0	0	0	0	0	0	0	0	0	0	0	0	0
23998	2	3	8	1	0	0	0	0	7	0	0	9	2	0	1	1	0	0	0	0	0	0	0	0	0	0	0	0	0	0	0	0	0	0	0	0	0	0	0	0	0	0	3	1	70	21	108	0	0
22294	0	0	0	0	0	0	0	1	0	0	0	1	0	0	0	17	58	40	10	24	17	36	46	59	0	0	0	0	0	0	0	0	0	0	0	0	0	0	0	0	0	0	0	0	0	1	0	0	0
25966	0	0	1	0	0	0	0	0	0	0	0	1	0	0	0	30	51	48	16	39	28	31	48	35	0	0	0	0	0	0	0	0	0	0	0	0	0	0	0	0	0	0	0	0	0	0	0	0	0
22266	0	0	0	0	0	0	0	0	0	0	0	1	0	0	0	21	58	47	11	41	16	28	35	39	0	0	0	0	0	0	0	0	0	0	0	0	0	0	0	0	0	0	0	0	0	0	0	0	0
14522	3	0	744	3	8	0	2	0	0	0	0	0	0	0	0	0	0	0	0	0	0	0	0	0	0	0	0	0	0	0	0	0	0	0	0	0	0	0	0	0	0	0	0	0	1	34	47	138	1
6014	10	7	16	10	2	0	0	2	5	0	0	29	96	3	0	0	0	0	0	0	1	0	1	1	1	0	43	0	17	0	0	0	0	0	0	0	0	0	0	0	0	0	0	27	8	9	68	0	0
4488	0	0	1	0	0	0	0	0	0	0	0	3	1	1	0	0	0	1	1	1	0	0	0	2	0	0	0	0	0	0	0	0	0	0	0	0	0	0	0	0	0	0	0	0	0	0	0	0	0
13359	21	17	2	2	3	1	12	0	0	4	4	7	9	2	12	254	664	368	265	492	861	1097	1649	1456	0	0	0	0	0	0	0	0	0	0	0	0	0	0	0	0	0	0	0	1	1	0	1	0	0
13526	5	0	0	3	3	0	0	0	3	4	0	2	0	1	4	141	334	560	86	204	222	301	482	383	0	0	0	0	0	0	0	0	0	0	0	0	0	0	0	0	0	0	0	0	0	1	0	0	0
13581	2	5	0	1	1	0	0	1	3	4	0	0	0	0	2	76	262	433	80	202	242	189	312	285	0	0	0	0	0	0	0	0	0	0	0	0	0	0	0	0	0	0	0	0	0	0	0	0	0
13583	5	0	2	0	0	0	2	2	0	2	0	2	0	1	1	86	216	373	83	233	211	161	259	209	0	0	0	0	0	0	0	0	0	0	0	0	0	0	0	0	0	0	0	0	0	0	0	0	0
22209	9	1	0	0	0	0	0	0	0	0	1	4	2	0	4	90	183	194	72	109	240	278	418	278	0	0	0	0	0	0	0	0	0	0	0	0	0	0	0	0	0	0	0	1	0	0	1	0	0
13365	5	0	0	0	1	0	0	0	0	0	0	0	2	0	2	55	100	228	60	111	74	105	209	154	0	0	0	0	0	0	0	0	0	0	0	0	0	0	0	0	0	0	0	0	0	0	0	0	0
13301	5	0	0	0	0	0	0	0	0	0	0	1	0	0	0	49	112	48	47	88	141	196	281	179	0	0	0	0	0	1	0	0	1	0	0	0	0	1	0	0	0	0	0	0	0	0	0	0	0
13299	2	0	0	1	0	0	0	0	0	0	0	1	0	0	0	39	112	49	35	68	108	137	268	181	0	0	0	0	0	0	0	0	0	0	0	0	0	0	0	0	0	0	0	0	0	0	0	0	1
13331	3	0	0	0	0	0	0	1	0	4	0	1	0	0	2	58	115	126	35	73	50	92	108	129	0	0	0	0	0	0	0	0	0	0	0	0	0	0	0	0	0	0	0	0	1	0	0	0	0
13330	0	0	0	0	0	0	0	0	1	0	0	1	0	0	1	50	81	110	31	62	47	96	109	75	0	0	0	0	0	0	0	0	0	0	0	1	0	0	0	0	0	0	0	0	0	0	0	0	0
22210	1	2	0	0	0	0	0	0	0	0	0	3	0	0	4	28	35	64	11	24	24	34	70	28	0	0	0	0	0	0	0	0	0	0	0	0	0	0	0	0	0	0	0	0	0	0	0	0	0
13799	2	0	0	5	2	448	0	53	7	31	63	7	23	15	22	0	2	4	1	5	0	23	0	9	0	3	2	0	0	0	0	2	1	0	0	1	0	1	0	2	0	1	0	18	0	2	1	0	413
22486	3	0	2	11	1	0	0	1	14	0	0	24	115	1	1	0	2	0	0	2	0	1	3	0	426	0	7	0	1271	13	208	724	846	217	601	2	0	0	637	5	0	0	2	2	12	6	19	2	0
22488	2	3	0	12	0	0	0	2	6	0	0	3	36	0	0	0	7	5	1	4	4	15	2	3	0	0	0	0	49	0	0	0	0	0	0	0	15	0	0	0	0	0	0	0	0	7	0	0	0
19191	32	12	2	26	6	0	13	6	57	3	3	171	403	9	15	343	678	1944	545	841	1010	1229	3796	919	54	0	0	0	46	0	0	0	0	0	26	0	0	0	15	0	0	0	1	1	15	27	1	0	0
19198	3	0	0	1	0	0	0	3	3	0	0	30	14	0	3	89	161	408	84	473	620	182	429	198	0	0	0	0	0	0	0	0	0	0	0	0	0	0	0	0	0	0	1	5	1	6	0	0	0
19373	1	1	0	3	1	0	0	0	0	0	0	2	1	0	0	67	133	277	43	187	288	150	397	176	0	0	0	0	0	0	0	0	0	0	0	0	0	0	1	0	0	0	0	0	0	0	0	0	0
19372	1	0	0	2	0	0	0	0	0	0	0	0	2	0	2	65	130	314	74	184	344	210	402	172	0	0	0	0	0	0	0	0	0	0	0	0	0	0	0	0	0	0	0	0	0	0	0	0	0
19374	1	3	0	0	0	0	0	0	0	0	0	3	0	0	0	62	153	308	68	179	245	157	325	162	0	0	0	0	0	0	0	0	0	0	0	0	0	0	0	0	0	0	0	1	0	0	0	0	0
19199	0	0	0	1	0	0	0	0	3	0	0	6	2	1	0	14	53	104	21	302	318	90	157	74	0	0	0	0	0	0	0	0	0	0	0	0	0	0	0	0	0	0	0	0	0	1	0	0	0
24918	0	0	0	1	0	0	3	0	9	0	0	18	33	2	0	1	7	56	1	308	433	14	67	22	0	0	2	0	0	0	0	0	0	0	0	0	0	0	0	0	0	0	0	0	0	0	0	0	0
24949	0	0	0	0	0	0	0	0	0	0	0	0	0	0	0	0	15	75	0	228	347	13	66	36	0	0	0	0	0	0	0	0	0	0	0	0	0	0	0	0	0	0	0	0	0	0	0	0	0
19194	0	0	0	0	0	0	0	0	0	0	0	0	0	0	0	1	5	34	2	187	178	2	23	4	0	0	0	0	0	0	0	0	0	0	0	0	0	0	0	0	0	0	0	0	0	0	0	0	0
24858	2	20	19	13	1	1	22	2	28	0	0	43	44	0	0	4	6	3	3	4	6	1	9	5	0	0	0	0	0	0	0	0	0	1	1	0	0	0	0	0	0	0	2	7	51	66	4	1	2
26929	0	0	0	0	0	0	0	0	0	0	0	0	0	0	0	3	11	45	4	92	124	12	44	29	0	0	0	0	0	0	0	0	0	0	0	0	0	0	0	0	0	0	0	0	0	0	0	0	0
26928	76	25	9	26	4	1	0	6	8	6	10	69	41	20	30	2366	4762	11202	2234	7125	10923	6969	13910	6350	2	0	0	0	0	2	0	4	1	0	0	1	0	2	0	0	0	0	2	2	5	8	0	2	0
24857	6	0	7	7	2	0	0	8	6	2	0	31	37	0	7	66	106	326	84	351	432	226	674	285	14	0	0	3	0	2	3	1	0	1	0	0	0	5	0	1	1	1	5	3	30	78	4	0	1
24912	0	0	0	1	1	0	0	0	0	0	0	0	1	0	0	30	52	129	22	79	149	99	198	85	0	0	0	0	0	0	0	0	0	0	0	0	0	0	0	0	0	0	0	0	0	0	0	1	0
24948	0	0	0	0	0	0	0	1	0	0	0	0	0	0	0	2	10	41	0	243	264	7	53	15	0	0	0	0	0	0	0	0	0	0	0	0	0	0	0	0	0	0	0	0	0	0	0	0	0
15265	9	4	1	22	0	0	0	1	7	0	0	58	403	3	1	0	1	0	2	3	3	3	3	0	0	0	0	0	0	0	0	0	0	0	0	0	0	0	0	0	0	0	1	0	23	8	8	0	0
23721	28	1	3	12	1	2	0	0	3	6	3	20	4	4	11	331	941	1836	285	648	1007	1362	2510	1617	0	0	0	0	0	0	0	1	0	0	0	0	1	0	0	1	0	0	0	5	8	4	3	1	0
23733	0	0	0	0	0	0	0	0	0	0	0	1	0	0	1	5	33	53	10	15	27	32	69	60	0	0	0	0	0	0	0	0	0	0	0	0	0	0	0	0	0	0	0	0	0	0	0	0	0
26431	12	4	5	52	2	1	11	3	13	7	0	42	121	6	7	1049	1601	4084	969	2379	1411	1489	4739	1494	0	0	0	0	0	0	0	1	0	0	0	0	0	0	0	0	0	0	3	8	14	11	10	0	1
19327	14	14	28	50	8	0	0	3	28	0	0	84	15	2	2	0	1	8	0	0	1	11	0	3	0	0	0	0	0	0	0	0	0	0	0	0	0	0	0	0	0	0	0	0	14	75	8	0	0
19329	4	0	0	1	0	0	0	0	4	0	0	19	0	0	0	67	97	231	61	120	85	101	289	60	0	0	0	0	0	0	0	0	0	0	0	0	0	0	0	0	1	0	0	5	0	5	0	0	0
19236	7	9	223	23	23	0	0	0	2	0	0	8	17	2	0	0	0	2	1	3	3	5	0	1	0	0	0	0	0	0	0	0	0	0	0	0	0	0	0	0	0	0	9	1	34	74	59	5	0
24884	0	0	0	2	0	0	0	0	0	0	0	10	11	1	0	0	3	25	0	246	151	7	62	19	0	0	0	0	0	0	0	0	0	0	0	0	0	0	0	0	0	0	0	2	0	5	0	0	0
8812	0	0	0	0	0	0	0	0	0	0	0	0	0	0	0	0	5	34	2	287	202	2	30	9	0	0	0	0	0	0	0	0	0	0	0	0	0	0	0	0	0	0	0	0	0	1	0	0	0
19241	2	5	10	1	5	1	0	1	21	0	0	15	7	1	2	3	0	1	3	2	3	0	1	1	0	0	0	0	0	0	0	0	0	0	0	0	0	0	0	0	0	0	3	3	6	229	6	0	0
26430	0	0	0	1	0	0	0	0	0	0	0	1	6	0	0	35	44	114	33	76	47	42	132	54	0	0	0	0	0	0	0	0	0	0	0	0	0	0	0	0	0	0	0	1	2	0	1	0	0
19239	56	29	54	192	17	0	0	1	0	0	0	3	3	0	0	0	0	1	0	0	0	0	0	3	0	0	0	0	0	0	0	0	0	0	0	0	0	0	0	0	0	0	0	58	94	6	7	2	0
19240	7	1	43	22	9	0	0	0	16	0	0	31	22	4	1	0	1	1	0	1	0	0	0	0	0	0	0	0	0	0	0	0	0	0	0	0	0	0	0	0	0	0	4	0	9	181	9	0	0
24881	0	0	0	0	0	0	0	0	0	0	1	1	2	0	0	33	44	130	17	32	27	35	113	43	0	0	0	0	0	0	0	0	0	0	0	0	0	0	0	0	0	0	0	0	1	0	2	0	0
22383	55	10	11	18	14	170	51	6276	7	156	34	22	30	1	3697	1	1	1	4	4	0	5	7	1	0	0	0	0	0	0	0	4	0	0	0	0	0	0	0	0	0	0	1	14	23	96	17	30	911
6009	58	308	8	17	41	0	0	0	0	0	0	3	22	2	0	0	0	2	0	0	0	1	0	0	0	0	0	0	0	0	0	0	0	0	0	0	0	0	0	0	0	0	54	53	50	2	236	1	0
22386	2	0	0	0	0	8	0	192	1	6	0	0	0	0	108	0	0	0	0	0	0	0	0	0	0	0	0	0	0	0	0	0	0	0	0	0	0	0	0	0	0	0	0	0	0	0	0	0	30
22385	3	1	0	0	0	1	1	142	0	8	2	1	2	0	108	0	0	0	0	0	0	0	0	0	0	0	0	0	0	0	0	0	0	0	0	0	0	0	0	0	0	0	0	0	0	1	1	0	29
14520	4	3	4	12	3	0	0	2	2	4	0	12	179	1	8	187	296	238	269	1013	481	316	1416	236	0	0	0	0	0	0	0	0	0	0	0	0	0	0	0	0	0	0	0	2	0	5	10	1	0
22619	10	13	35	44	8	0	0	1	24	1	0	109	670	0	6	1	4	2	1	0	3	0	8	1	0	0	0	0	0	0	0	0	0	0	0	0	0	0	0	0	0	0	1	3	42	10	3	1	1
14521	8	0	4	27	4	0	0	2	23	0	0	92	469	6	7	0	1	1	1	7	2	0	7	1	3	0	0	0	0	0	0	0	0	0	0	0	0	0	0	0	0	0	2	1	5	31	22	0	0
22618	3	5	0	33	2	0	0	0	3	1	0	88	489	1	5	0	0	3	2	0	0	0	2	0	0	0	0	0	0	0	0	0	0	0	0	0	0	0	0	0	0	0	0	4	17	14	9	0	0
22598	7	0	1	1	0	0	0	0	0	0	1	5	0	1	3	30	74	52	27	112	174	146	564	154	0	0	0	0	0	0	0	0	0	0	0	0	0	0	0	0	0	0	0	0	0	0	0	0	0
22602	0	3	1	6	0	0	0	0	8	0	0	28	185	0	0	0	0	0	0	0	0	1	2	2	0	0	1	0	0	0	0	0	0	0	21	0	0	0	0	0	0	0	0	4	5	9	2	0	0
6005	0	0	0	0	0	0	0	0	0	0	0	0	0	0	0	0	0	0	0	0	0	0	0	0	0	0	0	0	0	0	0	0	0	0	0	0	1492	0	0	0	0	0	0	0	0	0	0	0	0
1193	4	0	8	1	0	0	0	1	1	1	1	1	0	0	8	44	80	275	57	90	59	92	141	271	0	0	0	0	0	0	0	0	0	0	0	0	0	0	0	0	0	0	0	0	0	1	5	0	0
17917	0	7	0	0	0	0	0	0	1	0	0	0	8	1	0	50	186	224	44	101	131	168	151	247	0	0	0	0	0	0	0	0	0	0	0	0	0	0	0	0	0	0	0	1	0	0	0	1	0
1235	5	0	3	6	1	0	0	1	1	1	0	5	1	0	5	20	73	219	66	77	44	50	131	181	0	0	0	0	0	0	0	0	0	0	0	0	0	0	0	0	0	0	1	0	0	0	0	0	0
17916	0	0	1	0	0	0	0	1	0	0	0	1	0	3	0	12	108	97	25	56	71	83	67	101	0	0	0	0	0	0	0	0	0	0	0	0	0	0	0	0	0	0	0	0	1	0	0	0	0
4800	13	0	4	11	0	0	0	1	2	0	0	4	16	1	4	56	225	261	49	191	82	144	283	73	0	0	0	0	0	0	0	0	0	0	0	0	0	0	0	0	0	0	0	1	0	2	0	0	0
12273	5	2	6	7	3	0	0	3	0	2	4	19	31	7	12	287	1044	1475	289	736	941	839	1408	988	1	0	0	0	0	0	0	0	0	0	1	0	0	0	0	0	0	0	0	4	4	5	3	0	0
12274	4	1	4	34	1	0	0	0	2	0	0	39	33	0	0	0	4	6	0	5	1	0	5	1	0	0	0	1	0	0	0	0	0	0	0	0	0	0	1	0	0	0	8	75	69	4	96	0	0
12277	7	0	5	3	0	0	0	0	3	0	0	2	0	0	0	0	0	0	0	0	0	0	0	0	0	0	0	0	0	0	0	0	0	0	0	0	0	0	0	0	0	0	0	7	17	0	0	0	0
19275	17	0	2	4	0	0	0	0	0	0	0	0	0	0	0	0	0	1	0	0	0	7	0	0	0	0	0	0	0	0	0	0	0	0	0	0	0	0	0	0	0	0	22	20	216	1	9	0	0
3681	2	0	6	11	4	0	0	0	6	0	0	74	253	2	1	0	0	0	0	0	0	0	0	0	0	0	0	0	0	0	0	0	0	0	0	0	0	0	0	0	0	0	0	1	3	1	0	0	0
8811	116	49	12	80	112	0	5	0	3	0	0	16	43	0	0	0	0	0	0	0	0	0	0	0	0	0	0	0	0	0	0	0	0	0	0	0	0	0	0	0	0	0	4	29	13	0	6	0	0
26370	29	7	11	108	21	0	16	24	14	17	10	132	170	12	43	1819	8192	9339	4411	13482	4217	4918	9352	4734	0	0	0	1	0	0	0	0	0	0	0	0	0	0	0	0	0	0	2	1	32	14	4	0	2
24363	40	22	12	123	20	0	0	27	33	22	0	260	303	3	35	918	3684	5528	2670	7010	1982	2062	4322	2578	0	0	0	0	0	0	0	0	0	1	0	0	0	0	0	0	0	0	9	5	65	62	1	2	2
24328	26	4	2	56	6	1	0	23	13	7	0	102	111	4	15	371	1889	2747	1494	3754	974	1154	2299	1189	0	0	0	0	0	0	0	0	0	0	0	0	0	0	0	0	0	0	5	3	14	28	3	0	1
24258	27	8	4	104	14	0	2	10	20	5	0	160	162	3	22	247	1216	1532	601	1783	587	654	998	1219	0	0	0	0	0	0	0	0	0	0	0	0	0	0	0	0	0	0	13	7	88	68	17	0	0
24259	6	0	2	49	5	0	0	10	9	1	0	62	95	1	11	167	811	1302	542	1286	379	401	868	719	0	0	0	0	0	0	0	0	0	0	0	0	0	0	0	0	0	0	5	1	6	7	2	0	0
18189	4	0	0	3	2	0	0	2	0	0	0	5	10	1	3	100	517	696	290	870	317	305	635	343	0	0	0	0	0	0	0	0	0	0	0	0	0	0	0	0	0	0	0	0	0	1	0	0	0
8080	6	3	0	24	1	0	0	2	2	0	0	16	97	0	3	30	157	251	59	726	335	94	111	194	0	0	0	0	0	0	0	0	0	0	0	0	0	0	0	0	0	0	1	0	11	0	5	0	0
18187	1	0	0	3	0	0	0	1	0	0	0	0	4	0	1	47	218	252	125	318	145	123	264	118	0	0	0	0	0	0	0	0	0	0	0	0	0	0	0	0	0	0	0	0	0	2	0	0	0
18331	0	0	0	0	0	0	0	0	0	0	0	1	0	0	0	0	18	96	2	1242	261	16	29	26	0	0	0	0	0	0	0	0	0	0	0	0	0	0	0	0	0	0	0	0	0	0	0	0	0
8085	0	0	0	0	0	0	0	0	0	0	0	0	0	0	0	1	26	60	1	1094	248	3	33	22	0	0	0	0	0	0	0	0	0	0	0	0	0	0	0	0	0	0	0	0	0	0	0	0	0
24296	1	0	0	1	1	0	0	0	1	0	0	6	4	0	1	51	217	238	125	375	105	148	259	134	0	0	0	0	0	0	0	0	0	0	0	0	0	0	0	0	0	0	0	0	0	1	0	0	0
8071	1	0	0	1	0	0	0	2	1	0	0	0	0	1	0	34	165	183	77	278	62	88	206	65	0	0	0	0	0	0	0	0	0	0	0	0	0	0	0	0	0	0	0	0	0	0	0	0	0
18367	0	0	1	0	1	0	0	0	0	0	0	3	11	0	0	19	90	129	84	465	104	54	169	42	0	0	0	0	0	0	0	0	0	0	0	0	0	0	0	0	0	0	0	0	3	0	0	0	0
18368	2	0	1	3	1	0	0	1	0	1	0	8	9	0	1	24	98	165	54	165	50	47	125	79	0	0	0	0	0	0	0	0	0	0	0	0	0	0	0	0	0	0	0	0	1	1	0	0	0
18188	0	0	0	1	0	0	0	1	0	0	0	3	3	0	0	23	132	162	67	217	53	91	151	74	0	0	0	0	0	0	0	0	0	0	0	0	0	0	0	0	0	0	0	0	0	2	0	0	0
18191	0	0	0	1	0	0	1	0	0	0	1	3	2	1	2	14	72	112	46	168	70	53	105	46	0	0	0	0	0	0	0	0	0	0	0	0	0	0	0	0	0	0	0	0	0	0	0	0	0
18190	0	0	0	0	1	0	1	0	0	0	0	0	4	0	1	27	112	144	73	186	50	64	177	63	0	0	0	0	0	0	0	0	0	0	0	0	0	0	0	0	0	0	0	0	0	0	0	0	0
24370	2	0	0	3	0	0	0	0	1	1	0	7	12	0	0	21	96	159	71	184	55	64	121	68	0	0	0	0	0	0	0	0	0	0	0	0	0	0	0	0	0	0	1	0	1	3	0	0	0
24293	0	0	0	1	0	0	1	1	0	0	0	1	4	0	0	15	104	127	33	143	45	51	138	67	0	0	0	0	0	0	0	0	0	0	0	0	0	0	0	0	0	0	0	0	0	0	0	0	1
18374	1	0	0	5	0	0	0	0	1	0	0	2	8	0	0	11	51	82	36	123	28	46	67	46	0	0	0	0	0	0	0	0	0	0	0	0	0	0	0	0	0	0	1	0	0	1	0	0	0
24330	0	0	0	1	0	0	0	0	2	0	0	5	5	0	1	14	46	48	38	94	23	19	65	23	0	0	0	0	0	0	0	0	0	0	0	0	0	0	0	0	0	0	0	0	1	2	0	0	0
18376	0	1	1	2	1	0	0	0	0	0	0	3	3	0	0	12	62	80	45	106	19	17	70	36	0	0	0	0	0	0	0	0	0	0	0	0	0	0	0	0	0	0	0	0	0	1	0	0	0
18337	0	0	0	0	0	0	0	0	0	0	0	0	0	0	0	0	5	20	1	336	57	1	10	1	0	0	0	0	0	0	0	0	0	0	0	0	0	0	0	0	0	0	0	0	0	0	1	0	0
18001	0	0	0	0	0	0	0	0	0	0	0	0	1	0	0	1	5	16	0	288	85	2	8	4	0	0	0	0	0	0	0	0	0	0	0	0	0	0	0	0	0	0	0	0	0	0	0	0	0
24261	0	0	0	0	0	0	0	0	0	0	0	0	0	0	0	1	15	25	2	253	46	3	12	13	0	0	0	0	0	0	0	0	0	0	0	0	0	0	0	0	0	0	0	0	0	0	0	0	0
26372	0	0	0	0	0	0	0	0	0	0	0	0	0	0	0	13	68	61	10	41	28	32	40	47	0	0	0	0	0	0	0	0	0	0	0	0	0	0	0	0	0	0	0	0	0	0	0	0	0
24334	1	0	0	5	0	0	0	0	1	0	0	0	1	0	0	3	50	68	43	79	29	24	63	17	0	0	0	0	0	0	0	0	0	0	0	0	0	0	0	0	0	0	0	0	1	0	0	0	0
18004	0	0	0	0	0	0	0	0	0	0	0	0	0	0	0	0	3	8	0	205	58	4	1	7	0	0	0	0	0	0	0	0	0	0	0	0	0	0	0	0	0	0	0	0	0	0	0	0	0
20974	466	218	1408	975	106	5	65	664	9	6112	1467	1107	103	193	5029	0	3	3	3	2	0	3	6	4	0	0	0	0	0	0	0	0	0	0	0	0	0	0	0	0	0	0	18	70	106	74	24	12	104
9570	3	0	1	0	0	0	0	0	0	0	0	2	0	0	0	0	0	0	0	0	0	0	1	0	0	0	0	0	0	0	0	0	0	0	0	0	0	0	0	0	0	0	0	0	7	153	70	0	2
10044	77	156	143	140	39	0	0	0	0	0	0	35	25	0	2	0	0	0	1	0	0	4	0	0	0	0	0	0	0	0	0	0	0	0	0	0	0	0	0	0	0	0	8	7	14	4	0	0	0
386	3	0	4	6	0	0	0	0	1	9	3	238	4	0	12	0	0	0	0	1	0	1	1	0	0	0	0	0	0	0	0	0	0	0	0	0	0	0	0	0	0	0	25	0	4	530	0	0	11
10045	10	10	45	26	4	0	0	11	0	154	48	24	2	5	145	0	0	0	0	0	0	0	0	0	0	0	0	0	0	0	0	0	0	0	0	0	0	0	0	0	0	0	0	3	3	2	0	0	4
10048	11	1	35	22	1	0	2	13	0	141	32	25	6	2	127	0	0	0	0	0	0	0	0	0	0	0	0	0	0	0	0	0	0	0	0	0	0	0	0	0	0	0	0	1	3	1	0	0	0
364	0	1	31	0	0	0	0	0	2	0	0	217	54	0	0	0	0	0	0	0	0	0	1	0	0	0	0	0	0	0	0	0	0	0	0	0	0	0	0	0	0	0	1	0	0	6	0	0	0
20978	7	0	176	42	0	0	0	0	0	0	0	6	1	0	0	0	0	0	0	0	0	0	3	0	0	0	0	0	0	0	0	0	0	0	0	0	0	0	0	0	0	0	0	7	1	2	3	0	0
10707	2	5	20	12	2	0	38	336	9	383	0	102	77	2	534	0	0	0	0	0	0	0	0	0	0	0	0	0	0	0	0	0	0	0	0	0	0	0	0	0	0	0	4	0	1	12	0	2	1
741	3	0	9	1	14	0	0	3	86	23	0	1013	270	0	0	3	0	0	0	0	0	1	0	0	0	0	0	0	0	0	0	0	0	0	0	0	0	0	0	0	0	0	0	0	8	45	0	1	0
2534	16	35	102	42	23	0	0	0	0	3	0	37	58	0	0	0	0	0	0	0	0	0	0	0	0	0	0	0	0	0	0	0	0	0	0	0	0	0	0	0	0	0	20	36	133	156	78	2	0
16656	96	1	20	494	0	0	0	0	0	0	0	0	0	0	0	0	0	0	0	0	0	0	0	0	0	0	0	0	0	0	0	0	0	0	0	0	0	0	0	0	0	0	1	1	0	3	169	2	0
16650	25	12	37	677	0	0	0	0	0	0	0	0	0	0	0	0	0	0	1	0	0	1	0	0	0	0	0	0	0	0	0	0	0	0	0	0	0	0	0	0	0	0	5	0	5	0	89	0	0
1599	0	29	8	1	0	0	0	1	29	0	0	332	517	5	2	0	0	0	0	0	0	0	0	0	0	0	0	0	0	0	0	0	0	0	0	0	0	0	0	0	0	0	0	0	0	14	1	0	0
10619	0	0	3	0	385	0	0	0	0	0	0	0	0	0	0	0	0	0	0	0	0	0	0	0	0	0	0	0	0	0	0	0	0	0	0	0	0	0	0	0	0	0	1	4	0	0	0	1	0
10621	1	14	16	81	167	0	0	0	0	0	0	267	16	0	0	0	0	0	0	0	0	0	1	0	0	0	0	0	0	0	0	0	0	0	0	0	0	0	0	0	0	0	7	0	0	27	9	0	0
10620	0	0	665	6	0	0	0	0	0	0	0	0	0	0	0	0	0	0	0	1	0	0	0	0	0	0	0	0	0	0	0	0	0	0	0	0	0	0	0	0	0	0	0	0	0	0	1	0	0
8437	11	0	6	927	1	0	0	0	0	0	0	0	0	0	0	0	0	0	0	0	0	2	0	0	0	0	0	0	0	0	0	0	0	0	0	0	0	0	0	0	0	0	1	8	37	17	11	0	0
3683	48	8	235	168	5	0	0	0	0	0	0	0	0	0	0	0	0	0	0	0	0	0	0	0	0	0	0	0	0	0	0	0	0	0	0	0	0	0	0	0	0	0	6	8	15	0	20	12	0
16759	45	13	10	6	3	1	9904	15738	911	60	1	1454	150	28	258	0	2	3	1	5	1	1	1	0	0	0	0	0	0	0	0	0	0	0	0	0	0	0	0	0	0	0	5	19	7	141	24	2	67
26150	1382	279	600	865	308	6	40	66	302	135	25	118	83	99	464	0	3	0	0	2	0	1	1	0	0	0	0	1	0	0	0	1	0	0	0	0	0	0	0	1	0	0	598	792	1053	905	377	54	15
16608	74	23	12	31	12	1	36	19	7	9	6	38	3	6	24	0	0	0	0	0	0	1	0	0	0	0	0	0	0	0	0	0	0	0	0	0	0	0	0	0	0	0	198	84	138	81	47	6815	4
16606	1	1	2	2	0	4	6	14	4	0	0	1	0	0	1	0	0	1	0	1	0	0	0	0	0	0	0	0	0	0	0	2	0	0	0	0	0	0	0	0	0	0	4	7	2	8	5	0	2433
16566	34	2	8	19	0	0	0	4	38	0	0	20	94	1	4	41	222	259	119	260	103	133	144	143	0	0	0	0	0	0	0	0	0	0	0	0	0	0	0	0	0	0	2	11	7	29	28	0	0
7024	0	1	1	0	0	0	247	339	29	3	0	40	5	0	6	0	0	0	0	0	0	0	0	0	0	0	0	0	0	0	0	0	0	0	0	0	0	0	0	0	0	0	0	0	0	6	1	0	2
16760	1	2	0	0	0	0	309	420	24	4	0	41	3	0	8	0	0	0	0	0	0	0	0	0	0	0	0	0	0	0	0	0	0	0	0	0	0	0	0	0	0	0	0	0	0	7	1	0	1
16764	1	0	0	0	0	0	248	427	23	1	0	37	2	1	5	0	0	0	0	0	0	0	0	0	0	0	0	0	0	0	0	0	0	0	0	0	0	0	0	0	0	0	0	0	0	9	1	0	1
9204	19	7	1	6	0	0	0	0	3	0	0	3	0	0	1	0	0	0	0	0	0	0	0	0	0	0	0	0	0	0	0	0	0	0	0	0	0	0	0	0	0	0	62	63	403	26	16	0	0
23471	20	16	0	7	1	0	0	0	2	1	0	4	9	0	0	0	1	0	0	0	0	0	0	2	0	0	0	0	0	0	0	0	0	0	0	0	0	0	0	0	0	0	133	249	117	81	61	0	0
16800	3	2	2	3	0	0	25	31	5	0	0	6	0	0	0	0	0	0	0	0	0	0	0	0	0	0	0	0	0	0	0	0	0	0	0	0	0	0	0	0	0	0	16	4	3	2	1	0	0
23436	79	48	51	167	26	0	0	0	1	2	0	14	19	0	3	0	0	0	0	1	0	0	0	2	0	0	0	0	0	0	0	0	0	0	0	0	0	0	0	0	0	0	14	24	17	3	27	2	0
16763	0	0	0	0	0	0	102	122	14	0	0	15	1	0	2	0	0	0	0	0	0	0	0	0	0	0	0	0	0	0	0	0	0	0	0	0	0	0	0	0	0	0	0	0	0	3	0	0	0
8462	43	5	2	19	3	0	0	0	0	0	0	0	0	0	0	0	0	0	0	0	0	0	0	0	0	0	0	0	0	0	0	0	0	0	0	0	0	0	0	0	0	0	12	0	197	0	18	0	0
16762	0	1	0	0	1	0	85	162	18	1	0	12	4	0	3	0	0	0	0	0	2	0	0	0	0	0	0	0	0	0	0	0	0	0	0	0	0	0	0	0	0	0	0	0	0	0	1	0	1
7052	7	0	2	1	1	0	24	28	1	0	0	5	0	0	0	0	0	0	0	0	0	0	0	0	0	0	0	0	0	0	0	0	0	0	0	0	0	0	0	0	0	0	0	1	4	2	1	1	1
26148	37	8	15	24	5	0	1	3	8	4	0	4	4	4	8	0	0	0	0	0	0	0	0	0	0	0	0	0	0	0	0	0	0	0	0	0	0	0	0	0	0	0	19	19	29	19	7	1	0
23440	28	6	10	17	11	0	1	2	11	3	1	6	1	4	7	0	0	0	0	0	0	0	0	0	0	0	0	0	0	0	0	0	0	0	0	0	0	0	0	0	0	0	17	21	29	24	2	3	0
7063	0	0	0	0	0	0	96	128	7	1	0	10	2	0	2	0	0	0	0	0	0	0	0	0	0	0	0	0	0	0	0	0	0	0	0	0	0	0	0	0	0	0	0	0	0	0	0	0	2
23473	24	5	3	1	2	0	3	0	1	0	0	3	0	0	1	0	0	0	0	0	0	0	0	0	0	0	0	0	0	0	0	0	0	0	0	0	0	0	0	0	0	0	27	61	183	46	14	0	0
4784	2	2	0	9	0	0	2	2	17	1	1	4	62	0	2	28	151	150	23	155	109	100	71	134	0	0	0	0	1	0	0	0	0	0	0	0	0	0	0	0	0	0	1	1	15	3	0	0	0
4779	445	71	430	1427	159	2	5	31	29	15	0	624	188	35	117	0	2	1	0	0	0	0	1	1	0	0	0	0	0	0	0	0	0	0	0	0	0	0	0	0	0	0	11	220	61	558	33	13	12
4777	4	1	6	1	2	2	24	471	53	4	0	11	1	0	6	1	1	0	0	0	0	1	0	2	0	0	0	0	0	0	0	0	0	0	0	0	0	0	0	0	0	0	0	7	1	123	8	0	84
22568	43	25	25	52	5	128	1927	4061	49	2963	11	16	11	62	5937	1	1	1	0	1	0	0	2	0	0	0	0	1	0	0	0	0	0	0	0	0	0	0	0	0	0	0	1	13	5	48	4	5	1066
14368	5	0	4	1	5	0	0	0	0	0	0	0	0	3	3	0	0	0	0	0	0	0	0	0	0	0	0	0	0	0	0	0	0	0	0	0	0	0	0	0	0	0	0	3	0	2	9	1621	2
22569	1	0	0	0	1	2	44	111	1	82	0	0	0	3	164	0	0	0	0	0	0	0	0	0	0	0	0	0	0	0	0	0	0	0	0	0	0	0	0	0	0	0	0	0	0	0	0	0	44
22570	0	1	0	1	0	5	34	91	0	65	0	3	1	1	169	0	0	0	0	0	0	0	0	0	0	0	0	0	0	0	0	0	0	0	0	0	0	0	0	0	0	0	0	0	0	1	0	0	30
27043	2564	1268	3574	1828	909	2157	2582	7828	9154	2914	180	13061	1621	790	13807	2	6	2	5	7	5	3	5	2	0	0	0	0	0	0	0	1	0	0	0	1	1	0	2	0	0	0	1128	924	1407	5799	1033	4210	659
24111	247	131	561	156	494	51	1206	1370	892	1650	511	1095	131	2534	3470	1	0	0	0	0	0	1	3	0	0	0	0	0	0	0	0	0	0	0	0	0	0	0	0	0	1	0	42	94	78	734	156	47	2
26239	8835	630	4214	2776	1055	1	23	8	258	297	45	183	44	132	103	0	0	0	0	0	0	0	3	1	0	0	0	0	0	0	0	0	0	0	0	0	0	0	0	0	0	0	330	1412	644	344	172	171	1
23918	3011	822	1465	718	480	0	1	16	564	8	0	643	440	11	147	0	0	0	1	0	1	0	3	0	0	0	0	0	0	0	0	0	0	0	0	1	0	0	0	0	0	0	678	1098	624	1232	1088	46	4
17414	1795	740	1324	785	936	0	12	1	45	4	0	168	64	4	11	1	0	0	1	0	0	0	0	0	0	2	0	1	0	0	0	0	0	0	0	0	0	0	0	0	0	0	509	612	249	39	470	119	0
11607	1763	399	1401	1847	631	0	1	0	50	4	1	473	39	2	11	0	0	0	0	1	0	0	1	0	0	0	0	0	0	0	0	0	0	0	0	0	0	0	0	0	0	0	262	382	201	401	581	21	0
17419	1859	210	1127	1385	634	0	0	1	1	0	0	7	8	1	0	0	0	1	0	1	0	0	0	0	0	0	0	0	0	0	0	0	0	0	0	0	0	0	0	0	0	0	107	489	197	0	553	38	0
24153	81	33	108	62	21	58	64	240	268	87	6	341	55	26	403	0	0	0	0	0	0	0	0	0	0	0	0	0	0	0	0	0	0	0	0	0	0	0	0	0	0	0	34	27	43	183	42	122	19
7837	57	29	79	50	13	45	67	86	136	85	13	227	30	48	300	0	0	1	0	0	0	0	0	0	0	0	0	0	0	0	0	0	0	0	0	0	0	0	0	0	0	0	16	21	31	106	24	81	7
11615	537	70	95	225	13	0	0	1	14	1	0	215	43	1	1	0	1	1	0	0	0	0	2	0	0	0	0	0	0	0	0	0	0	0	0	0	0	0	0	0	0	0	267	349	155	437	281	0	0
17864	72	41	102	56	24	61	74	227	263	69	5	325	36	21	336	0	0	0	0	0	0	0	0	0	0	0	0	0	0	0	0	0	0	0	0	0	0	0	0	0	0	0	28	35	40	149	39	108	16
11608	977	74	136	1070	84	0	0	0	0	0	0	2	0	0	0	0	0	0	0	0	0	0	0	0	0	0	0	0	0	0	0	0	0	0	0	0	0	0	0	0	0	0	287	443	203	5	341	9	0
17858	907	487	191	943	241	0	0	3	1	0	0	5	0	1	0	0	0	0	0	0	0	0	0	0	0	0	0	0	0	0	0	0	0	0	0	0	0	0	0	0	0	0	290	349	101	3	185	4	0
17162	2098	127	80	311	43	0	0	0	0	0	0	0	0	0	0	0	0	0	0	0	0	0	0	0	0	0	0	0	0	0	0	0	0	0	0	0	0	0	0	0	0	0	127	592	28	2	179	8	0
23690	457	38	37	265	2	0	0	0	0	1	0	1	9	0	0	0	1	0	0	0	1	1	1	0	0	0	0	0	0	0	0	0	0	0	0	0	0	0	0	0	0	0	503	78	811	2	161	0	0
21740	597	106	72	460	17	0	0	0	3	0	0	43	3	4	5	0	0	0	0	0	0	0	0	0	0	0	0	0	0	0	0	0	0	0	0	0	0	0	0	0	0	0	336	242	534	54	203	3	0
7866	34	14	41	16	17	24	60	148	144	64	8	204	20	48	234	0	0	0	0	0	0	0	0	0	0	0	0	0	0	0	0	0	0	0	0	0	0	0	0	0	0	0	17	12	20	117	16	59	7
17418	425	281	255	648	208	0	0	0	0	0	1	11	0	2	0	0	0	1	0	3	0	0	4	0	0	0	0	0	0	0	0	1	0	0	1	0	0	0	0	0	0	0	41	355	58	0	207	15	0
24155	38	13	44	23	9	36	35	91	117	45	2	168	22	7	182	0	0	0	0	0	0	0	0	0	0	0	0	0	0	0	0	0	0	0	0	0	1	0	0	0	0	0	12	15	26	81	11	59	11
23693	160	55	12	43	3	0	0	0	0	0	0	2	0	0	0	0	0	0	0	0	0	0	0	0	0	0	0	0	0	0	0	0	0	0	0	0	0	0	0	0	0	0	769	86	976	20	150	0	0
24156	25	11	26	16	6	18	21	91	91	54	1	134	14	9	176	0	0	0	0	0	0	0	0	1	0	0	0	0	0	0	0	0	0	0	0	0	0	0	0	0	0	0	11	11	5	54	7	33	6
17859	103	58	100	213	43	0	0	0	0	0	0	5	0	0	0	0	0	0	0	1	0	0	0	0	0	0	0	0	0	0	0	0	0	0	0	0	0	0	0	0	0	0	8	43	4	0	11	6	0
26295	8	8	7	11	3	100	24	17	18	35	0	67	5	6	65	0	0	0	0	0	0	0	0	0	0	0	0	0	0	0	0	0	0	0	0	0	0	0	0	0	0	0	0	3	3	21	4	18	0
7867	11	3	3	2	0	0	0	0	2	0	0	11	0	0	2	0	0	0	0	0	0	0	0	0	0	0	0	0	0	0	0	0	0	0	0	0	0	0	0	0	0	0	50	2	2	3	3	0	0
23642	490	53	45	460	18	0	0	0	0	0	0	0	0	0	0	0	0	0	0	0	0	1	0	0	0	0	0	0	0	0	0	0	0	0	0	0	0	0	0	0	0	0	121	137	15	0	61	1	0
26872	23	10	32	23	4	18	25	41	61	21	1	92	10	10	127	0	0	0	0	0	0	0	0	0	0	0	0	0	0	0	0	0	0	0	0	0	0	0	0	0	0	0	4	8	7	41	12	31	3
26209	644	33	36	49	10	0	0	0	0	0	0	0	0	0	0	0	0	0	0	0	0	0	0	0	0	0	0	0	0	0	0	0	0	0	0	0	0	0	0	0	0	0	29	95	39	0	60	1	1
7440	25	5	1	10	1	0	0	0	1	1	0	6	0	0	1	0	0	0	0	0	0	0	1	0	0	0	0	0	0	0	0	0	0	0	0	0	0	0	0	0	0	0	330	113	151	134	44	1	1
7854	14	6	23	11	8	16	14	41	46	23	3	65	8	19	93	0	0	0	0	0	0	0	0	0	0	0	0	0	0	0	0	0	0	0	0	0	0	0	0	0	0	0	2	7	7	31	3	14	3
8079	39	5	2	74	2	0	0	0	0	0	0	0	0	0	0	0	0	0	0	0	0	0	0	0	0	0	0	0	0	0	0	0	0	0	0	0	0	0	0	0	0	0	195	306	105	1	18	2	0
7637	255	92	123	144	46	0	0	0	0	0	0	0	4	0	0	0	0	0	0	0	0	0	0	0	0	0	0	0	0	0	0	0	0	0	0	0	0	0	0	0	0	0	36	129	64	2	2	4	0
7833	20	11	21	4	3	9	19	44	50	18	5	75	10	9	105	0	0	0	0	0	0	0	0	0	0	0	0	0	0	0	0	0	0	0	0	0	0	0	0	0	0	0	7	7	12	39	6	26	2
17415	46	1	27	21	2	1	2	2	10	4	0	20	2	0	13	0	0	0	0	0	0	0	0	0	0	0	0	0	0	0	0	0	0	0	0	0	0	0	0	0	0	0	53	14	4	11	4	2	0
26878	22	6	24	15	3	6	14	39	50	15	1	69	19	8	71	0	0	0	0	0	0	0	0	0	0	0	0	0	0	0	0	0	0	0	0	0	0	0	0	0	0	0	3	7	9	35	11	31	8
26289	19	4	23	11	5	13	17	21	41	11	2	44	5	3	70	0	0	0	0	0	0	0	0	0	0	0	0	0	0	0	0	0	0	0	0	0	0	0	0	0	0	0	7	7	8	20	5	23	1
7870	9	5	18	11	9	14	18	46	53	21	3	63	6	11	94	0	0	0	0	0	0	0	0	0	0	0	0	0	0	0	0	0	0	0	0	0	0	0	0	0	0	0	10	3	7	32	4	20	3
7846	5	6	10	7	11	11	19	38	46	21	2	76	4	17	74	0	0	0	0	0	0	0	0	0	0	0	0	0	0	0	0	0	0	0	0	0	0	0	0	0	0	0	7	6	4	34	8	25	0
7852	14	5	18	6	3	9	14	42	32	24	4	63	5	12	59	0	0	0	0	0	0	0	0	0	0	0	0	0	0	0	0	0	0	0	0	0	0	0	0	0	0	0	2	3	6	27	6	23	3
17855	4	8	25	8	4	9	10	33	28	9	4	55	7	4	50	0	0	0	0	0	0	0	0	0	0	0	0	0	0	0	0	0	0	0	0	0	0	0	0	0	0	0	2	3	6	27	5	14	2
11619	23	7	6	53	1	0	0	3	3	0	0	7	31	4	2	4	12	24	24	49	11	18	23	11	0	0	0	0	0	0	0	0	0	0	0	0	0	0	0	0	0	0	59	10	35	11	20	0	0
24118	7	3	12	6	16	0	34	41	40	41	10	28	6	66	100	0	0	0	0	0	0	0	1	0	0	0	0	0	0	0	0	0	0	0	0	0	0	0	0	0	0	0	0	8	2	21	4	4	0
5635	5	0	0	15	1	0	0	0	7	3	0	15	15	0	1	20	35	99	70	126	13	35	104	18	0	0	0	0	0	0	0	0	0	0	0	0	0	0	0	0	0	0	0	0	5	0	0	0	0
26244	274	9	134	62	17	0	3	0	6	10	1	0	1	5	2	0	0	0	0	0	0	0	0	0	0	0	0	0	0	0	0	0	0	0	0	0	0	0	0	0	0	0	13	38	15	6	1	6	0
27044	5	5	12	10	1	3	8	31	27	8	0	53	3	0	45	0	0	0	0	0	0	0	0	0	0	0	0	0	0	0	0	0	0	0	0	0	0	0	0	0	0	0	7	3	5	19	1	17	4
17860	7	0	11	2	5	3	37	41	25	38	10	32	0	55	91	0	0	0	0	0	0	0	0	0	0	0	0	0	0	0	0	0	0	0	0	0	0	0	0	0	0	0	0	1	3	21	1	0	0
23691	96	20	4	50	0	0	0	0	0	0	0	2	0	1	0	0	0	0	0	0	0	0	0	0	0	0	0	0	0	0	0	0	0	0	0	0	0	0	0	0	0	0	91	135	73	2	110	1	0
23922	84	18	41	15	9	0	0	0	19	0	0	8	9	0	4	0	0	0	0	0	0	0	0	0	0	0	0	0	0	0	0	0	0	0	0	0	0	0	0	0	0	0	19	41	28	38	25	1	0
7874	8	4	7	6	2	6	8	28	32	16	0	35	7	6	40	0	0	0	0	0	0	0	0	0	0	0	0	0	0	0	0	0	0	0	0	0	0	0	0	0	0	0	4	4	4	22	3	14	0
26247	236	16	83	67	31	0	1	0	6	5	1	3	1	5	1	0	0	0	0	0	0	0	0	0	0	0	0	0	0	0	0	0	0	0	0	0	0	0	0	0	0	0	5	39	16	7	0	3	0
26212	197	11	50	114	12	0	0	0	0	0	0	0	0	1	0	0	0	0	0	0	0	1	0	0	0	0	0	0	0	0	0	0	0	0	0	0	0	0	0	0	0	0	9	17	10	0	10	3	0
26877	9	6	11	4	7	5	2	22	31	8	2	52	5	3	35	0	0	0	0	0	0	0	0	0	0	0	0	0	0	0	0	0	0	0	0	0	0	0	0	0	0	0	0	0	8	28	4	15	2
23921	62	23	29	18	12	0	0	0	5	1	0	14	12	0	5	0	0	1	0	0	0	0	0	0	0	0	0	0	0	0	0	0	0	0	0	0	0	0	0	0	0	0	24	41	20	22	28	1	0
26874	8	4	14	3	4	9	14	23	22	10	1	42	1	2	38	0	0	0	0	0	0	0	0	0	0	0	0	0	0	0	0	0	0	0	0	0	0	0	0	0	0	0	3	3	1	18	2	10	2
26288	5	8	11	8	2	0	7	29	26	8	1	62	2	1	34	0	0	0	0	0	0	0	0	0	0	0	0	0	0	0	0	0	0	0	0	0	0	0	0	0	0	0	0	1	5	17	5	8	3
27049	4	4	11	6	3	3	9	30	32	2	0	47	5	2	48	0	0	0	0	0	0	0	0	0	0	0	0	0	0	0	0	0	0	0	0	0	0	0	0	0	0	0	0	1	4	32	2	15	1
17870	181	101	38	76	29	0	0	0	0	0	0	0	0	0	0	0	0	0	0	0	0	0	0	0	0	0	0	0	0	0	0	0	0	0	0	0	0	0	0	0	0	0	2	19	1	0	17	2	0
26297	6	7	8	1	3	2	8	25	16	7	0	42	2	5	22	0	0	0	0	0	0	0	0	0	0	0	0	0	0	0	0	0	0	0	0	0	0	0	0	0	0	0	0	6	6	11	2	16	1
21739	10	0	6	12	2	0	0	0	0	0	0	2	0	0	0	0	1	0	0	0	0	0	1	0	0	0	0	0	0	0	0	0	0	0	0	0	0	0	0	0	0	0	69	3	83	0	3	0	0
25007	128	21	70	27	8	2	47	579	572	13	0	908	97	1	41	1	0	0	0	2	1	0	0	0	0	0	0	0	0	1	0	0	0	0	0	0	0	0	0	0	0	0	10	3	1	226	20	14	1136
17944	754	108	507	3031	101	0	0	0	0	0	0	0	0	0	0	0	0	1	0	0	0	0	0	0	0	0	0	0	0	0	0	0	0	0	0	0	0	0	0	0	0	0	14	96	1	0	48	0	0
8081	115	26	5	45	3	0	0	0	1	0	0	44	0	0	2	0	0	0	0	0	0	0	0	0	0	0	0	0	0	0	0	0	0	0	0	0	0	0	0	0	0	0	364	57	573	113	96	0	0
17945	588	31	296	154	67	0	0	0	0	0	0	3	1	1	0	0	0	0	0	0	0	0	0	0	0	0	0	0	0	0	0	0	0	0	0	0	0	0	0	0	0	0	156	306	131	2	200	1	1
20473	66	22	7	17	10	0	0	3	3	1	0	35	3	0	5	0	0	0	0	0	0	0	1	0	0	0	0	0	0	0	0	0	0	0	0	0	0	0	0	0	0	0	117	73	9	172	70	0	28
18249	235	263	52	62	40	0	1	0	1	0	0	13	4	0	0	0	0	0	0	0	0	0	0	0	0	0	0	0	0	0	0	0	0	0	0	0	0	0	0	0	0	0	140	282	147	25	148	4	0
18253	65	14	3	11	0	0	0	0	0	0	0	2	0	0	0	0	1	0	0	0	0	0	0	0	0	0	0	0	0	0	0	0	0	0	0	0	0	0	0	0	0	0	371	34	492	19	17	0	0
19277	99	17	11	42	1	0	0	0	0	1	0	25	0	0	2	0	0	1	0	0	0	1	0	0	0	0	0	0	0	0	0	0	0	0	0	0	0	0	0	0	0	0	250	90	132	71	32	0	0
19274	216	44	54	84	1	0	0	0	0	0	0	3	0	0	0	0	0	0	0	0	0	0	0	0	0	0	0	0	0	0	0	0	0	0	0	0	0	0	0	0	0	0	83	78	66	6	98	0	0
25006	4	0	5	1	0	0	1	21	19	1	0	30	3	0	2	0	0	0	0	0	0	0	0	0	0	0	0	0	0	0	0	0	0	0	0	0	0	0	0	0	0	0	1	0	0	7	1	1	24
19457	1	0	0	5	0	0	0	0	0	0	0	0	0	0	0	0	0	0	0	0	0	0	0	0	0	0	0	0	0	0	0	0	0	0	0	0	0	0	0	0	0	0	642	16	111	16	13	0	0
25009	1	0	4	1	1	0	1	20	20	0	0	29	2	0	0	0	0	0	0	0	0	0	0	0	0	0	0	0	0	0	0	0	0	0	0	0	0	0	0	0	0	0	0	0	0	5	0	1	33
25010	3	0	1	0	0	0	1	17	13	0	0	19	1	0	0	0	0	0	0	0	0	0	0	0	0	0	0	0	0	0	0	0	0	0	0	0	0	0	0	0	0	0	0	2	0	2	0	0	32
18252	29	0	3	0	1	0	0	0	0	0	0	0	0	0	0	0	0	0	0	0	0	0	0	0	0	0	0	0	0	0	0	0	0	0	0	0	0	0	0	0	0	0	49	56	106	2	8	5	0
25012	7	0	4	0	0	0	0	16	19	1	0	21	2	0	0	0	0	0	0	0	0	0	0	0	0	0	0	0	0	0	0	0	0	0	0	0	0	0	0	0	0	0	0	0	0	2	0	0	12
17643	11	0	13	61	3	0	0	0	0	0	0	3	0	0	0	1	0	0	2	2	0	3	2	0	0	0	0	0	0	0	0	0	0	0	0	0	0	0	0	0	0	0	5	36	35	60	333	1	0
21329	1	1	9	10	0	1	78	74	205	10	10	697	11	10	838	0	1	3	1	0	0	0	1	0	0	0	0	0	0	0	0	0	0	0	0	0	0	0	0	0	0	0	0	9	14	1463	0	0	684
7320	1	0	0	0	0	0	0	0	21	0	0	0	0	2	0	0	0	2	0	0	0	0	3	0	0	0	0	0	0	0	0	0	0	0	0	0	0	0	0	0	0	0	12	65	27	39	45	0	0
21328	0	0	0	0	0	12	97	68	193	27	9	122	0	13	1289	1	0	0	0	2	1	0	1	0	0	0	0	0	0	0	0	0	0	0	0	0	0	0	0	0	0	0	0	1	1	46	0	0	354
24974	0	0	58	6	0	1693	20	4	0	7	7	0	0	1	47	2	0	0	0	1	1	0	0	0	0	0	0	0	0	0	0	0	0	0	0	0	0	0	0	0	0	0	0	8	1	0	0	7	734
6658	295	25	353	247	0	0	0	0	0	8	0	370	0	8	9	0	0	2	0	0	0	0	0	0	0	0	0	0	0	0	0	0	0	0	0	0	0	0	0	0	0	0	0	0	1	78	27	0	0
25050	0	0	1	0	1	75	1	1	3	9	26	4	0	1	991	0	0	0	0	1	0	0	0	0	0	0	0	0	0	0	0	0	0	0	0	0	0	0	0	0	0	0	0	4	0	0	0	422	201
4334	30	5	4	16	4	0	0	1	2	3	0	15	12	0	10	78	231	225	97	143	239	151	182	488	0	0	0	0	0	0	0	0	0	0	0	0	0	0	0	0	0	0	2	2	10	8	11	0	0
18469	9	8	1	5	2	0	1	3	2	1	5	13	8	3	1	27	105	122	41	80	162	102	54	948	0	0	0	0	0	0	0	0	0	0	0	0	0	0	0	0	0	0	0	0	0	7	0	0	0
1800	4	7	2	6	3	0	1	2	4	0	2	6	3	2	1	34	234	155	40	72	123	86	141	603	0	0	0	0	0	0	0	0	0	0	0	0	0	1	0	0	1	0	0	4	1	5	0	1	0
11461	32	1	2	9	0	0	0	1	0	0	0	25	0	0	0	0	1	0	0	0	0	0	0	0	0	0	0	0	0	0	0	0	0	0	0	0	0	0	0	0	0	0	0	2	1	34	4	2	272
4613	60	5	48	47	0	0	0	0	1	0	0	27	0	2	1	0	0	0	0	0	0	0	0	0	0	0	0	0	0	0	0	0	0	0	0	0	0	0	0	0	0	0	0	4	2	5	5	0	0
1817	4	1	2	9	5	0	0	1	0	2	0	3	0	0	1	19	160	90	13	48	93	46	69	335	0	0	0	0	0	0	0	0	0	0	0	0	0	0	0	0	0	0	1	0	0	0	0	0	0
11571	55	3	9	84	0	0	0	0	0	0	0	0	0	0	0	1	1	0	1	1	0	1	0	0	0	0	0	0	0	0	0	0	0	0	0	0	0	0	0	0	0	0	97	62	165	53	11	0	29
18470	1	1	1	1	0	0	0	4	0	1	0	0	9	1	3	28	82	53	7	32	51	61	37	332	0	0	0	0	0	0	0	0	0	0	0	0	0	0	0	0	0	0	0	0	0	3	9	0	0
6287	3	4	0	1	1	1	12	0	0	2	1	3	2	1	3	12	68	56	32	38	66	25	44	203	0	0	0	0	0	0	0	0	0	0	0	0	0	0	0	0	0	0	0	0	0	0	0	0	0
1042	1	0	0	2	0	0	0	0	0	1	0	0	0	0	1	36	41	85	17	33	37	88	70	93	0	0	0	0	0	0	0	0	0	0	0	0	0	0	0	0	0	0	0	0	0	0	0	0	0
25616	0	0	0	5	1	0	2	0	0	0	0	0	0	0	0	22	98	41	8	39	41	63	47	72	0	0	0	0	0	0	0	0	0	0	0	0	0	0	0	0	0	0	0	1	0	0	1	0	0
25617	0	0	0	0	0	0	0	0	0	0	0	0	0	0	0	18	79	32	10	28	26	33	41	99	0	0	0	0	0	0	0	0	0	0	0	0	0	0	0	0	0	0	0	0	0	0	0	0	1
8639	74	72	70	127	1	109	129	139	6	81	46	76	19	51	1948	2	2	3	0	0	0	1	6	3	0	0	0	0	0	0	0	0	0	0	0	0	0	0	0	0	0	0	13	22	73	83	4	239	89
2523	2	1	1	1	0	53	5	204	28	21	21	11	0	2	3050	0	1	0	0	1	0	6	0	3	0	0	0	0	0	0	0	0	0	0	0	0	0	0	0	0	0	0	12	22	29	141	0	3	362
10712	2	4	4	4	0	1	11	5	271	0	1	110	3	5	0	0	0	0	0	0	0	0	0	0	0	0	0	0	0	0	0	0	0	0	0	0	0	0	0	0	0	0	1	2	0	13	0	307	166
8257	111	1	291	303	1	48	20	2	13	8	6	264	2	13	546	1	0	2	1	0	0	0	4	0	0	0	0	0	0	0	0	0	0	0	0	0	0	0	0	0	0	0	0	37	2	69	0	0	140
1185	0	2	5	0	0	7	1	16	1	51	0	0	0	0	53	0	0	0	0	0	0	0	1	0	2	0	0	0	0	0	0	0	0	0	0	0	0	0	0	0	0	0	0	0	0	0	0	0	64
365	229	92	290	149	14	0	0	0	32	1	1	172	20	5	0	0	1	1	0	0	0	0	1	0	0	0	0	0	0	0	0	0	0	0	0	0	0	0	0	0	0	0	5	10	57	125	30	1	0
20938	123	22	197	152	30	0	0	0	46	1	58	7	2	31	1	2	1	2	0	3	1	1	6	0	0	0	0	0	0	0	0	0	0	0	0	0	0	0	0	0	0	0	6	66	82	22	198	72	0
387	2	6	8	6	1	0	455	81	29	5	0	21	25	0	758	2	0	1	2	0	4	0	0	0	0	0	0	0	0	0	0	0	0	0	0	0	0	0	0	0	0	0	0	0	3	1	0	0	20
20951	25	34	82	36	21	0	0	0	45	0	30	186	268	574	22	0	1	1	0	0	0	0	1	0	0	0	0	0	0	0	0	0	0	0	0	0	0	0	0	0	0	0	1	0	3	7	24	5	0
1615	99	5	64	46	0	0	1	0	0	0	0	4	2	0	0	0	0	0	0	0	0	0	0	0	0	0	0	0	0	0	0	0	0	0	0	0	0	0	0	0	0	0	1	61	0	366	251	1	0
10722	2	7	0	4	0	0	0	0	24	0	0	214	3	8	2	0	0	1	1	0	0	0	1	0	0	0	0	0	0	0	0	0	0	0	0	0	0	0	0	0	0	0	2	2	12	404	8	0	0
20952	100	35	35	12	1	0	0	0	62	0	135	29	0	135	32	0	0	0	0	0	1	0	2	1	0	0	0	0	0	0	0	0	0	0	0	0	0	0	0	0	0	0	2	22	16	92	90	16	0
10844	0	0	0	0	0	1	6	23	1	4	0	11	0	0	476	0	0	1	0	0	0	0	1	0	0	0	0	0	0	0	0	0	0	0	0	0	0	0	0	0	0	0	0	0	0	0	0	0	88
20954	5	0	0	0	0	0	0	0	0	0	0	0	0	0	0	0	0	1	0	0	1	0	0	0	0	0	0	0	0	0	0	0	0	0	0	0	0	0	0	0	0	0	4	20	29	0	7	0	0
377	118	39	64	219	4	0	0	0	0	0	0	142	16	2	2	0	0	0	0	0	0	0	1	0	0	0	0	0	0	0	0	0	0	0	0	0	0	0	0	0	0	0	0	0	0	1	0	0	0
20937	10	14	16	60	2	0	0	0	0	0	0	3	5	0	0	0	0	1	1	0	1	4	2	0	0	0	0	0	0	0	0	0	0	0	0	0	0	0	0	0	0	0	3	15	11	16	106	38	0
11083	0	0	0	0	0	0	0	6	12	0	0	3	0	1	0	0	0	0	0	0	0	0	0	0	0	0	0	0	0	0	0	0	0	0	0	0	0	0	0	0	0	0	0	0	0	0	5	80	207
10843	40	0	3	48	0	0	0	0	0	0	0	91	6	0	0	0	0	0	0	0	0	0	1	0	0	0	0	0	0	0	0	0	0	0	0	0	0	0	0	0	0	0	28	34	7	92	20	0	0
9964	8	46	15	0	0	0	0	0	37	1	0	176	162	8	35	0	1	2	1	0	0	0	2	0	0	0	0	0	0	0	0	0	0	0	0	0	0	0	0	0	0	0	1	0	0	9	1	0	0
9961	0	1	2	0	0	0	0	0	34	0	0	40	9	0	1	0	0	0	0	0	0	0	0	0	0	0	0	0	0	0	0	0	0	0	0	0	0	0	0	0	0	0	0	0	1	95	4	0	0
3372	10	0	1	37	2	0	0	0	0	0	0	0	0	0	0	0	0	0	0	0	0	0	0	0	0	0	0	0	0	0	0	0	0	0	0	0	0	0	0	0	0	0	0	0	1	3	0	0	0
10706	4	0	1	0	0	0	0	0	2	0	0	4	0	0	0	0	0	0	0	0	0	0	0	0	0	0	0	0	0	0	0	0	0	0	0	0	0	0	0	0	0	0	0	5	22	157	23	1	0
23979	4	1	0	58	0	0	0	12	0	0	0	71	1	0	5	0	0	0	0	0	0	0	0	0	0	0	0	0	0	0	0	0	0	0	0	0	0	0	0	0	0	0	0	0	0	22	0	0	57
23978	0	1	0	1	0	0	11	1	0	1	1	2	0	0	156	0	0	0	0	0	0	0	0	0	0	0	0	0	0	0	0	0	0	0	0	0	0	0	0	0	0	0	0	2	0	6	0	4	54
22689	228	92	859	125	48	3	3938	86	84	748	41	631	118	114	180	0	2	1	0	1	1	2	1	0	0	0	25	0	0	0	0	0	0	0	0	1	7	0	0	1	0	0	27	42	41	197	52	1637	2407
14641	78	19	40	26	1	0	38	4	26	37	0	116	18	1	34	0	0	0	0	0	0	0	0	0	0	0	0	0	0	0	0	0	0	0	0	0	0	0	0	0	0	0	41	7	7	128	4	12	34
14650	22	13	33	4	3	0	94	4	16	13	1	230	75	4	33	0	0	0	0	0	0	0	0	0	0	0	0	0	0	0	0	0	0	0	0	0	0	0	0	0	0	0	8	2	2	44	0	11	12
22690	4	3	19	8	0	0	99	1	1	38	0	20	3	4	3	0	0	0	0	0	0	0	0	0	0	0	0	0	0	0	0	0	0	0	0	0	0	0	0	0	0	0	0	1	0	11	2	34	53
22728	32	5	16	11	0	0	7	1	3	16	1	40	7	0	9	0	0	0	0	0	0	0	0	0	0	0	0	0	0	0	0	0	0	0	0	0	0	0	0	0	0	0	10	2	2	42	2	5	10
22729	20	6	3	6	0	0	8	0	6	17	0	30	4	0	9	0	0	0	0	0	0	0	0	0	0	0	0	0	0	0	0	0	0	0	0	0	0	0	0	0	0	0	5	2	3	26	1	0	11
22726	752	192	479	235	22	0	294	43	213	444	11	1217	153	22	311	0	0	0	0	0	0	0	0	1	0	0	1	0	0	0	0	0	0	0	0	0	0	0	0	0	0	0	446	79	99	1340	41	134	352
14635	237	129	347	62	10	2	863	76	176	122	22	2493	816	58	368	0	0	0	0	1	0	2	3	1	0	0	5	0	0	0	0	0	0	0	0	0	1	0	0	0	0	0	64	40	25	545	9	124	140
22691	5	4	13	6	0	0	97	3	1	18	0	16	1	3	3	0	0	0	0	0	0	0	0	0	0	0	0	0	0	0	0	0	0	0	0	0	0	0	0	0	0	0	0	0	0	6	1	33	46
26661	2628	3189	2051	3144	3834	34360	1063	1752	145	4143	2981	1596	274	5715	2188	2	8	5	2	11	3	4	5	5	5	5	5	11	4	1	3	5	2	0	6	8	0	0	5	7	5	4	324	989	484	202	482	37	4794
25768	3672	2299	1650	4623	2191	1986	458	278	1185	434	196	4873	3033	114	738	93	366	725	198	327	170	309	718	296	2	1	1	3	2	2	1	25	1	0	1	6	2	0	1	3	2	1	3462	3681	4415	3003	1223	81	1046
26620	2826	1820	2516	2893	2379	1344	295	498	149	1357	14122	1508	2112	3670	3153	5	2	6	4	8	1	7	2	3	3	0	1	1	0	1	1	1	0	0	1	1	1	0	0	2	2	1	522	756	473	1190	1551	103	1282
21527	40	7	61	24	16	6	141	63	43	363	426	1005	224	3440	2208	0	2	0	0	2	2	0	1	2	1	0	0	1	0	2	1	1	0	2	1	0	0	1	0	1	0	0	6	16	17	322	12	3962	694
21571	71	81	270	85	38	8	680	416	229	968	324	460	25	457	7183	0	2	1	1	1	0	1	2	2	0	0	0	1	0	0	0	0	1	0	0	0	0	1	1	0	1	0	6	32	66	491	13	279	1794
9933	24	17	42	11	39	3	392	362	187	30	2	316	47	6	480	0	0	7	1	3	0	0	7	1	5	0	26	0	0	0	0	0	0	0	0	0	0	0	0	0	0	0	1	17	3	146	28	5015	1231
10892	462	441	247	833	51	0	1	0	8	5	0	102	11	2	14	0	0	2	2	1	1	2	2	0	0	0	0	0	0	0	0	0	0	0	0	0	0	0	0	0	0	0	2917	551	4091	122	51	0	3
11074	0	1	2	15	0	1	13	784	8	20	5	12	33	1	128	0	1	0	0	0	1	0	0	0	0	0	0	0	0	0	0	0	0	0	0	0	0	0	0	0	0	0	1	2	0	5	5	3785	1375
21421	85	54	115	62	414	3	21	12	45	22	1	357	400	14	70	0	0	2	1	0	1	1	0	2	0	1	1	2	2	0	2	5	0	0	2	0	1	2	0	2	0	0	14	44	238	389	179	76	94
21420	1031	1521	966	1903	795	0	0	1	11	17	0	258	150	9	11	1	0	0	0	0	2	0	1	0	0	0	0	0	0	0	0	0	0	0	0	0	0	0	0	0	0	0	80	208	19	22	19	16	0
11175	220	150	517	516	326	39	19	19	4	70	29	110	4	180	64	0	1	0	0	0	0	0	0	1	2	0	1	3	1	2	0	0	2	0	2	1	1	1	1	1	0	2	3	58	26	13	402	22	390
10958	73	35	179	117	240	107	0	12	21	18	388	44	136	266	245	3	3	7	4	11	3	11	2	3	5	10	6	22	7	13	7	11	5	6	8	15	15	8	5	16	7	7	15	20	35	20	49	5	3
11351	76	98	69	83	90	1045	30	44	9	100	84	48	6	173	67	0	0	0	0	0	0	0	1	0	0	0	0	0	0	0	0	0	0	0	0	0	0	0	0	0	0	0	8	37	12	13	8	0	143
10956	58	51	89	83	26	57	3	4	1	33	389	48	57	95	77	0	0	0	0	0	0	0	0	0	1	0	0	0	0	0	0	0	0	0	0	0	0	0	0	0	0	0	19	24	7	27	41	4	42
11348	67	70	58	83	108	869	23	38	1	109	61	31	5	145	57	0	1	0	0	1	0	0	0	0	0	0	0	0	0	0	0	0	0	0	0	0	0	0	0	0	0	0	7	30	19	5	10	0	140
21472	93	75	33	107	66	53	13	13	25	13	4	131	82	3	16	2	13	21	5	4	6	10	23	13	0	0	0	0	0	0	0	0	0	0	0	0	0	0	0	0	0	0	121	99	117	70	38	4	31
11174	26	11	9	43	16	665	3	3	4	13	0	35	12	2	7	0	2	4	0	3	1	2	2	2	0	0	0	0	0	0	0	1	0	0	0	0	0	0	0	0	0	0	96	18	19	15	4	0	7
21374	91	59	78	70	53	58	9	18	2	30	379	43	51	117	95	0	0	0	1	0	0	0	1	1	0	0	0	0	0	0	0	0	0	0	0	0	0	0	0	0	0	0	18	19	18	32	43	2	30
21467	85	51	34	114	49	54	11	6	39	8	3	103	83	2	13	2	13	13	4	10	1	5	12	9	0	0	0	0	0	0	0	0	0	0	0	0	0	0	0	0	0	0	85	103	96	80	18	3	24
11353	28	32	17	34	20	755	6	14	7	26	42	22	30	22	22	0	0	0	2	1	0	0	0	0	0	1	0	1	0	0	0	0	0	1	1	2	0	0	0	0	0	0	7	8	12	2	2	1	19
21468	59	27	40	92	16	31	3	2	9	8	6	80	44	6	10	3	8	9	1	5	5	1	15	5	0	0	0	0	1	0	0	2	0	0	1	0	2	0	0	0	0	0	62	66	65	22	17	0	23
21375	88	41	63	80	66	44	4	13	8	42	301	30	50	83	77	0	0	0	0	0	0	0	0	0	0	0	0	0	0	0	0	0	0	0	0	0	0	0	0	0	0	0	17	20	14	19	30	3	38
21604	28	51	32	54	31	483	6	4	3	83	47	31	2	73	27	0	0	0	0	1	0	1	0	0	0	1	0	1	1	1	0	0	0	0	1	0	0	1	0	0	0	0	3	21	5	7	6	0	66
10962	29	21	29	35	26	11	3	5	1	21	183	11	23	44	47	0	0	0	1	1	0	0	0	0	0	0	0	0	0	0	0	0	0	0	0	0	0	0	0	0	0	0	8	8	8	13	14	1	13
21655	9	6	5	15	7	934	1	3	0	5	0	7	1	8	2	0	0	0	0	0	0	0	0	0	0	0	0	0	0	0	0	0	0	0	0	0	0	0	0	0	0	0	51	0	1	0	1	0	3
25724	13	5	14	17	12	260	2	4	1	1	41	2	8	4	27	0	0	0	0	0	0	0	0	0	0	0	0	0	0	0	0	0	0	0	0	0	0	0	0	0	0	0	25	1	1	2	2	1	4
11347	10	23	5	23	26	197	7	12	1	24	22	14	1	45	9	0	0	0	0	0	0	0	0	0	0	0	0	0	0	0	0	0	0	0	0	0	0	0	0	0	0	0	1	10	1	0	1	1	32
25769	30	20	11	37	16	14	3	2	6	5	0	36	19	1	2	0	2	8	1	2	0	4	7	1	0	0	0	0	0	0	0	0	0	0	0	0	0	0	0	0	0	0	20	22	39	26	12	1	11
21469	22	13	6	28	19	13	9	3	6	1	1	35	21	1	6	0	3	9	3	4	1	2	5	2	0	0	0	0	0	0	0	2	0	0	0	0	0	0	0	0	0	0	31	24	21	32	9	1	8
21473	7	10	17	10	12	10	1	1	4	0	0	27	2	0	1	0	0	1	0	2	0	0	1	2	0	0	0	0	0	0	0	0	0	0	0	0	0	0	0	0	0	0	27	9	3	8	1	0	0
21526	1	2	2	0	0	0	1	1	0	8	17	35	8	98	51	0	0	0	0	0	0	0	0	0	0	0	0	0	0	0	0	0	0	0	0	0	0	0	0	0	0	0	0	1	0	9	0	108	21
25817	25	18	9	17	21	221	5	10	0	32	17	6	1	34	7	0	0	0	0	0	0	0	0	0	0	0	0	0	0	0	0	0	0	0	0	0	0	0	0	0	0	0	1	4	3	0	2	0	36
21528	0	1	2	0	1	1	2	0	0	15	8	33	8	55	57	0	0	0	0	0	0	0	0	1	0	0	0	0	0	0	0	0	0	0	0	0	0	0	0	0	0	0	0	0	0	4	0	107	22
26625	41	28	129	16	81	210	0	11	0	4	26	4	17	6	5	0	0	1	0	0	0	0	0	0	0	0	0	0	0	0	0	0	0	0	0	0	0	0	0	0	0	0	2	6	1	2	8	0	0
25728	16	14	24	23	15	10	1	2	1	14	111	18	19	31	30	0	0	0	0	0	0	0	0	0	0	0	0	0	0	0	0	0	0	0	0	0	0	0	0	0	0	0	1	7	3	8	13	1	5
25730	17	10	16	23	6	10	4	1	0	10	113	15	12	24	25	0	0	0	0	0	0	0	0	0	0	0	0	0	0	0	0	0	0	0	0	0	0	0	0	0	0	0	4	7	3	6	11	1	6
21576	3	3	13	1	1	0	17	11	4	48	9	5	0	14	196	0	0	0	0	0	0	0	0	0	0	0	0	0	0	0	0	0	0	0	0	0	0	0	0	0	0	0	0	0	2	10	1	11	45
25770	15	9	9	22	7	24	2	1	3	2	0	23	10	0	2	0	0	3	0	3	1	0	3	1	0	1	1	0	0	1	0	1	0	0	0	0	1	2	0	0	0	1	24	18	13	13	3	2	6
25731	14	10	23	15	20	5	1	2	1	11	96	8	6	25	19	0	0	0	0	0	0	0	0	0	0	0	0	0	0	0	0	0	0	0	0	0	0	0	0	0	0	0	7	2	3	5	5	0	13
25821	10	6	5	12	1	27	3	0	1	9	5	23	0	13	36	0	0	0	0	0	0	0	0	0	0	0	0	0	0	0	0	0	0	0	0	0	0	1	0	0	0	0	1	14	3	6	8	8	6
11359	14	14	17	14	22	100	3	12	1	24	19	7	1	34	14	0	0	0	0	0	0	0	0	0	0	0	0	0	0	0	0	0	0	0	0	0	0	0	0	0	0	0	0	2	5	1	1	0	22
21572	0	0	4	2	4	0	22	6	5	27	3	7	1	12	176	0	0	0	0	0	0	0	0	0	0	0	0	0	0	0	0	0	0	0	0	0	0	0	0	0	0	0	0	0	7	12	0	4	41
25774	1	0	1	2	0	0	0	0	0	0	0	0	0	0	0	0	0	0	0	0	0	0	0	0	0	0	0	0	0	0	0	0	0	0	0	0	0	0	0	0	0	0	383	1	7	0	0	0	0
21471	18	12	10	29	6	6	3	2	4	0	0	26	11	0	5	0	0	3	0	0	1	1	3	1	0	0	0	0	0	0	0	0	0	0	0	0	0	0	0	0	0	0	9	11	15	18	13	2	1
11365	10	12	6	19	13	133	6	5	0	23	7	4	0	11	9	0	0	1	0	0	0	0	0	0	0	0	0	0	0	0	0	0	0	0	0	0	0	0	0	0	0	0	0	8	0	1	0	0	18
9940	0	0	3	0	1	0	13	5	2	1	0	15	0	0	10	0	0	0	0	0	0	0	0	0	0	0	0	0	0	0	0	0	0	0	0	0	0	0	0	0	0	0	0	0	0	8	2	125	34
10905	0	1	3	6	0	0	0	0	0	0	0	0	0	0	0	0	0	0	0	0	0	0	0	0	0	0	0	0	0	0	0	0	0	0	0	0	0	0	0	0	0	0	294	1	8	0	0	0	0
355	760	172	104	116	18	0	0	0	32	9	2	1661	262	1	9	0	0	3	0	0	4	7	1	4	0	0	0	0	0	0	0	0	0	0	0	0	0	0	0	0	0	0	478	269	1099	1606	56	1	3
362	0	0	0	0	0	0	0	0	0	0	1	6	2	0	0	0	0	0	0	0	0	1	0	0	1	0	0	0	2	0	3	4	0	0	0	0	0	0	0	0	0	0	0	0	0	0	0	0	0
19857	4	3	1	19	2	0	0	0	360	0	0	21	28	1	0	2	0	2	0	0	0	0	4	2	0	0	0	0	0	0	0	1	0	0	0	0	0	0	0	0	0	0	3	12	8	33	4	0	0
14637	5	5	3	7	1	0	79	0	5	7	0	126	5	4	33	0	0	0	0	0	0	0	0	0	0	0	0	0	0	0	0	0	0	0	0	0	0	0	0	0	0	0	11	9	12	181	14	71	163
20705	5	16	2	20	0	0	1	0	2	1	0	320	54	3	7	0	0	0	0	0	0	0	0	0	0	0	0	0	0	0	0	0	0	0	0	0	0	0	0	0	0	0	1	2	4	41	0	0	1
25262	33	43	63	205	11	884	234	2834	383	10727	1039	372	137	16	2157	1	2	2	1	2	5	2	4	3	0	0	0	0	0	0	0	0	0	0	0	0	0	0	0	0	1	0	19	18	24	116	7	14	301
25190	33	11	2	38	6	1	2	3	3	7	3	30	16	3	22	1257	4210	4713	1422	4985	4141	4831	10495	3995	1	0	0	1	0	0	1	2	0	0	0	1	0	1	0	0	1	0	18	2	25	5	1	1	1
25125	5	3	0	8	4	1	0	5	1	7	4	7	9	0	3	577	1798	2807	807	1083	1098	1301	1981	1660	2	0	0	0	0	0	0	0	1	0	0	0	0	0	0	0	0	1	0	0	4	8	0	0	1
25240	4	8	12	5	4	0	4	1	9	1	2	24	7	0	7	0	0	2	0	0	0	0	1	0	17	0	5	0	120	33	52	4174	603	0	3	266	100	3	211	563	47	14	10	2	11	17	11	4	0
19985	1	1	0	0	0	0	0	0	0	0	0	3	1	3	1	255	472	683	256	132	134	697	1753	576	0	0	0	0	0	0	0	0	0	0	0	0	0	0	0	0	0	0	0	0	0	0	0	0	0
19792	14	12	1	12	1	0	6	2	2	2	1	5	20	10	2	176	313	459	102	46	108	316	553	1394	0	0	0	0	0	0	0	0	0	0	0	0	0	0	0	0	0	0	1	0	105	8	2	3	1
20086	3	0	0	3	0	0	0	0	1	1	0	2	5	0	2	129	419	481	112	301	424	408	785	502	0	0	0	0	0	0	0	0	0	0	0	0	0	0	0	0	0	0	0	0	3	3	0	0	1
20038	20	60	439	30	42	1	5	4	48	55	31	523	207	23	43	0	0	2	0	2	1	0	0	1	0	0	0	0	0	0	0	0	0	0	0	0	32	2	0	0	9	1	4	3	16	120	28	2	2
19935	108	76	108	125	4	0	4	8	15	32	3	795	335	17	151	0	3	0	1	2	0	4	3	3	8	0	5	0	0	0	0	17	0	0	0	0	3	0	0	0	0	0	137	29	32	193	9	0	0
20888	35	56	19	250	24	0	4	13	41	8	0	193	224	10	45	5	15	15	11	13	1	13	41	4	7	0	17	0	4	0	0	0	0	0	1	0	0	0	0	0	0	0	51	21	76	66	52	3	20
92	0	0	0	2	0	68	0	6	0	20	2	1	0	0	2	0	0	0	0	1	0	0	0	0	0	0	0	0	0	0	0	0	0	0	0	0	0	0	0	0	0	0	0	0	0	0	0	0	0
9029	0	0	0	0	0	0	0	0	0	0	0	0	0	0	0	1	0	0	0	0	0	0	0	0	0	0	0	0	4	0	0	1981	0	74	1	66	0	0	0	0	0	0	0	0	2	0	0	0	0
104	0	0	0	0	0	49	0	4	0	4	0	3	0	0	3	0	0	0	0	0	0	0	0	0	0	0	0	0	0	0	0	0	0	0	0	0	0	0	0	0	0	0	3	0	0	0	0	0	0
9055	27	192	45	155	17	0	0	2	67	4	2	232	144	2	17	4	6	4	5	2	6	4	16	7	0	0	6	0	0	0	0	0	0	0	0	0	6	0	0	0	7	0	10	10	31	122	21	1	0
20825	2	1	0	5	0	0	0	4	0	0	0	3	0	0	1	67	271	237	78	82	174	180	217	539	0	0	0	0	0	0	0	0	0	0	0	0	0	0	0	0	0	0	0	0	0	2	0	0	1
25265	0	1	2	10	0	27	6	32	5	286	25	13	2	0	37	0	0	1	0	0	0	0	0	0	0	0	0	0	0	0	0	0	0	0	0	0	0	0	0	0	0	0	0	0	0	2	1	0	6
25263	1	0	1	8	1	29	6	68	13	317	22	8	3	0	57	0	0	0	0	0	0	0	0	0	0	0	0	0	0	0	0	0	0	0	0	0	0	0	0	0	0	0	0	0	0	5	0	0	12
19986	9	21	50	25	91	0	0	1	2	2	0	256	23	2	19	0	0	0	0	0	0	0	1	0	0	0	1	0	0	0	0	0	0	0	0	0	17	0	0	0	2	0	15	6	4	33	81	6	9
19725	0	3	9	0	2	0	0	0	146	0	0	9	6	1	1	0	1	2	2	0	0	0	1	1	0	0	3	0	3	0	12	0	0	0	4	6	0	0	0	3	0	0	223	14	47	10	12	0	0
25261	1	3	1	2	0	17	6	57	8	273	25	4	3	0	53	0	0	1	0	0	0	0	0	0	0	0	0	0	0	0	0	0	0	0	0	0	0	0	0	0	0	0	0	0	0	2	2	0	3
9033	2	0	0	6	2	0	0	1	1	0	0	0	1	0	3	33	97	116	30	82	172	70	83	385	0	0	0	0	0	0	0	0	0	0	0	0	0	0	0	0	0	0	0	0	0	0	0	0	0
20826	0	0	0	3	0	0	0	0	0	0	1	2	1	0	1	50	110	149	31	41	22	86	253	118	0	0	0	0	0	0	0	0	0	0	0	0	0	0	0	0	0	0	0	1	2	2	0	0	0
20041	1	0	0	4	1	0	0	0	0	0	0	1	1	0	0	119	180	218	123	65	24	96	190	120	0	0	0	0	0	0	0	0	0	0	0	0	0	0	0	0	0	0	0	0	1	1	0	0	0
20827	0	0	0	0	0	0	0	0	0	1	0	0	1	1	1	83	113	173	44	39	28	133	208	114	0	0	0	0	0	0	0	0	0	0	0	0	0	0	0	0	0	0	0	0	0	1	0	0	1
25191	1	0	0	1	0	0	0	0	0	1	0	3	2	0	0	41	115	120	33	119	125	127	274	81	0	0	0	0	0	0	0	0	0	0	0	0	0	0	0	0	0	0	1	1	0	0	0	0	0
25241	10	12	21	5	3	0	0	4	117	3	0	142	44	5	24	0	0	0	0	0	0	0	1	0	0	0	2	0	0	0	0	0	0	0	0	0	4	0	0	0	0	0	21	11	268	51	19	0	4
20669	29	41	92	44	31	0	1	0	8	2	3	26	43	7	12	2	3	4	3	5	0	4	13	4	0	0	0	0	0	0	2	28	0	0	0	0	0	0	0	0	0	0	25	19	53	35	50	0	5
25193	2	0	0	0	0	0	0	0	0	0	0	3	2	0	0	21	98	110	16	98	90	88	190	103	0	0	0	0	0	0	0	0	0	0	0	0	0	0	0	0	0	0	0	0	1	1	0	0	0
25200	0	0	0	3	0	0	0	0	1	0	0	0	0	0	0	35	103	133	39	108	74	126	241	100	0	0	0	0	0	0	0	0	0	0	0	0	0	0	0	0	0	0	0	0	1	1	0	0	0
19724	1	0	0	1	0	0	0	0	0	0	0	1	1	0	0	22	99	99	24	69	52	39	93	71	0	0	0	0	0	0	0	0	0	0	0	0	0	0	0	0	0	0	0	0	0	0	0	0	0
25202	0	0	0	0	0	0	0	0	1	0	0	1	0	0	0	1	27	33	3	307	316	27	61	33	0	0	0	0	0	0	0	0	0	0	0	0	0	0	0	0	0	0	0	0	0	0	1	0	0
20724	25	73	42	22	36	0	3	6	11	38	0	51	18	3	8	0	0	0	0	0	0	0	0	0	28	0	16	0	7	0	2	0	4	0	35	0	83	0	18	0	66	0	10	7	16	25	27	0	3
25269	0	0	0	2	0	9	1	27	0	102	13	8	2	1	20	0	0	0	0	0	0	0	0	0	0	0	0	0	0	0	0	0	0	0	0	0	0	0	0	0	0	0	0	0	1	1	0	1	4
20044	0	3	1	0	0	0	0	1	2	0	0	14	47	0	1	0	1	2	2	0	1	0	2	0	2	0	0	0	22	0	2	100	90	0	2	15	0	0	141	6	2	0	2	2	14	1	0	0	1
20087	3	4	4	3	0	0	0	0	5	0	2	18	12	0	5	0	3	1	0	0	0	0	0	1	53	0	9	0	113	0	0	0	0	0	4	1	118	4	31	0	44	10	20	2	19	13	12	1	2
25268	1	0	0	1	1	4	0	19	4	86	6	4	0	1	22	0	0	0	0	0	0	0	0	0	0	0	0	0	0	0	0	0	0	0	0	0	0	0	0	0	0	0	0	0	0	0	0	0	5
20708	4	10	11	22	4	0	0	1	4	0	0	181	23	1	14	0	0	0	0	0	0	0	0	0	0	0	0	0	8	0	0	0	0	0	0	0	0	0	0	0	1	0	5	7	2	36	4	1	13
25126	0	0	0	0	0	0	0	0	0	0	0	1	0	0	0	15	61	65	21	18	22	37	46	41	0	0	0	0	0	0	0	0	0	0	0	0	0	0	0	0	0	0	0	0	0	1	0	0	0
20674	5	4	2	7	1	0	0	0	3	0	0	2	13	0	0	15	56	56	29	24	6	24	73	24	0	0	0	0	0	0	0	0	0	0	0	0	0	0	0	0	0	0	5	0	8	0	3	0	0
19728	1	0	0	0	0	0	0	0	0	0	0	1	0	0	0	26	124	183	46	77	61	92	98	118	0	0	0	0	0	0	0	0	0	0	0	0	0	0	0	0	0	0	0	0	1	0	0	0	0
19737	0	0	0	0	0	0	0	0	0	0	0	0	0	0	0	2	12	40	2	160	141	5	24	25	0	0	0	0	0	0	0	0	0	0	0	0	0	0	0	0	0	0	0	0	0	0	0	0	0
25127	0	0	0	0	0	0	0	0	0	0	0	0	0	0	1	8	53	84	26	22	29	26	44	45	0	0	0	0	0	0	0	0	0	0	0	0	0	0	0	0	0	0	0	0	0	0	0	0	0
25153	6	16	24	14	7	0	15	8	10	4	2	65	16	4	86	0	0	0	0	0	0	0	1	1	0	0	1	0	0	0	0	0	0	0	0	0	2	0	0	0	3	0	3	1	4	28	13	2	6
25636	8	4	2	7	6	0	0	2	4	4	2	11	6	2	6	901	1686	2566	725	465	333	1693	3431	1817	0	0	0	0	0	0	0	0	0	0	0	0	0	0	1	0	0	0	0	0	6	6	2	0	1
19860	74	153	339	89	273	0	10	19	113	39	3	460	176	39	125	0	0	0	0	0	0	0	0	0	0	0	0	0	0	0	0	0	0	0	0	0	0	0	0	0	0	0	6	43	48	269	42	15	18
19795	2	0	0	7	1	0	0	1	0	3	1	1	3	0	0	70	181	271	138	368	101	123	300	101	0	0	0	0	0	0	0	0	0	0	0	0	0	0	0	0	0	0	0	0	0	1	0	0	0
25637	0	0	0	1	0	0	0	0	0	0	0	0	0	0	0	21	44	80	25	14	14	45	100	49	0	0	0	0	0	0	0	0	0	0	0	0	0	0	0	0	0	0	0	0	0	0	0	0	0
25635	0	0	0	0	0	0	0	0	0	0	0	0	0	0	0	25	41	70	28	17	7	49	94	45	0	0	0	0	0	0	0	0	0	0	0	0	0	0	0	0	0	0	0	0	0	0	0	0	0
25155	74	268	427	201	94	3	162	147	204	77	45	967	340	77	1202	0	0	2	0	0	0	0	2	1	0	0	63	0	0	0	0	0	0	0	0	0	159	0	0	0	76	0	38	23	72	393	108	9	151
25154	1	1	2	1	3	0	0	0	0	1	0	5	11	0	0	22	40	56	40	18	3	74	120	23	0	0	0	0	0	0	0	0	0	0	0	0	1	0	0	0	0	0	0	0	2	2	0	0	0
25242	0	10	4	5	13	0	0	0	2	0	0	4	8	0	3	0	0	0	0	0	0	0	1	16	38	0	4	0	8	0	3	0	2	0	1	0	81	70	4	0	68	56	3	0	6	12	4	0	1
19793	15	176	60	24	16	0	0	0	2	4	0	34	2	1	1	1	0	0	1	0	0	1	2	0	0	0	0	0	0	0	0	0	0	0	0	0	0	0	0	0	0	2	10	4	12	50	18	1	3
7634	6	0	0	1	2	0	0	2	3	3	0	0	6	3	3	47	192	133	66	137	149	108	135	572	0	0	0	0	0	0	0	0	0	0	0	0	0	0	0	0	0	0	0	1	0	1	0	0	0
5450	0	0	0	0	0	0	0	0	0	0	0	0	0	0	0	0	0	0	0	0	0	0	0	0	0	0	0	0	0	0	0	0	0	0	0	0	0	0	0	0	0	0	18	4	259	15	1	0	0
5454	8	6	0	22	2	0	4	29	2	12	5	48	39	5	19	2	1	2	0	1	0	0	0	3	0	0	0	0	0	0	0	0	0	0	0	0	0	0	0	0	0	0	6	31	51	26	3	0	0
21818	80	17	15	48	24	0	0	5	16	38	18	34	12	16	47	277	1048	621	311	837	1270	718	1014	4611	0	0	0	0	0	0	0	0	0	0	0	1	0	0	0	0	0	0	0	3	26	18	6	1	3
12161	69	14	22	34	22	0	14	5	9	35	17	35	11	12	41	286	1024	614	308	728	1279	677	930	4892	0	0	0	0	0	0	0	0	0	0	0	0	0	0	0	0	0	0	0	0	6	13	3	0	0
121	3	1	1	7	3	0	0	1	2	5	0	0	3	1	0	29	127	47	30	18	97	90	55	415	0	0	0	0	0	0	0	0	0	0	0	0	0	0	0	0	0	0	0	0	2	1	0	0	0
19565	32	1	4	10	7	0	20	2	0	9	6	7	2	12	8	73	279	185	81	200	319	200	206	1160	0	0	0	0	0	0	0	0	0	0	0	0	0	0	0	0	0	0	0	0	0	2	1	0	1
12162	5	4	0	2	3	0	0	0	0	3	1	1	2	0	4	26	106	48	29	80	113	38	74	389	0	0	0	0	0	0	0	0	0	0	0	0	0	0	0	0	0	0	0	0	0	0	0	0	0
12164	5	3	0	0	0	0	0	0	1	0	0	9	0	1	0	17	106	39	28	37	65	65	52	283	0	0	0	0	0	0	0	0	0	0	0	0	0	0	0	0	0	0	0	0	0	0	0	0	0
21817	1	1	2	0	2	0	0	0	0	5	1	0	0	0	1	13	34	22	14	29	67	16	45	289	0	0	0	0	0	0	0	0	0	0	0	0	0	0	0	0	0	0	0	0	0	0	0	0	0
21822	6	0	0	4	0	0	0	1	2	2	0	1	2	1	2	20	51	28	12	35	65	48	44	196	0	0	0	0	0	0	0	0	0	0	0	0	0	0	0	0	0	0	1	0	0	0	0	0	0
19568	4	0	0	2	0	1	0	1	0	4	0	2	0	0	0	10	24	29	14	25	45	12	38	143	0	0	0	0	0	0	0	0	0	0	0	0	0	0	0	0	0	0	0	0	0	0	0	0	0
1937	163	14	43	96	4	0	0	0	1	3	0	0	0	0	1	0	0	1	0	0	0	0	0	3	0	0	0	0	0	0	0	0	0	0	0	0	0	0	0	0	0	0	2	3	24	28	0	2	0
10968	1	0	0	1	1	0	1	0	130	0	0	2	36	0	0	0	1	0	0	0	1	0	0	0	0	0	0	0	0	0	0	0	0	0	0	0	0	0	0	0	0	0	7	89	21	8	5	0	0
1394	186	5	1	65	0	0	0	0	0	0	0	2	0	0	0	0	0	0	0	0	0	0	0	0	0	0	0	0	0	0	0	0	0	0	0	0	0	0	0	0	0	0	21	5	26	5	0	0	0
730	113	702	55	394	188	0	0	0	0	1	0	21	13	0	4	0	1	0	0	0	0	1	1	1	0	0	0	0	0	0	0	1	0	0	0	0	0	0	0	0	0	0	693	200	1637	19	21	3	0
728	0	0	0	0	0	0	0	0	0	0	0	0	0	0	0	0	0	0	0	0	0	0	0	0	0	0	0	0	0	0	0	0	0	0	0	0	0	0	0	0	0	0	0	0	0	2	0	0	4
731	39	106	65	51	10	4	20	1	181	25	0	308	85	9	99	0	0	0	0	0	0	0	1	0	0	0	3	0	2	0	0	0	0	0	0	0	10	0	0	0	0	0	272	94	47	182	22	3	11
724	227	284	305	524	620	2	76	6	132	6	0	287	166	2	99	1	1	1	0	2	0	0	1	1	0	0	0	0	0	0	0	4	0	2	1	0	0	0	0	0	0	0	286	570	782	745	458	4	80
10503	212	494	207	225	139	0	116	7	38	35	0	239	37	7	82	0	3	0	1	0	2	1	0	0	1	0	4	0	0	0	0	0	0	0	0	0	0	0	0	0	0	0	206	150	169	295	21	2	54
21303	0	3	10	2	1	0	2	1	141	31	76	45	0	84	266	0	0	2	0	0	0	0	0	0	0	0	0	0	0	0	0	0	0	0	0	0	0	0	0	0	0	0	0	1	0	158	0	1	41
563	0	0	0	0	0	1	0	0	0	0	0	1	0	0	0	0	0	0	0	0	0	0	0	0	0	0	0	0	0	0	0	0	0	0	0	0	0	0	0	1	0	0	0	0	0	3	0	0	3
21302	41	4	83	14	2	0	0	0	0	0	0	10	0	0	0	0	0	0	0	0	1	0	0	0	0	0	0	0	0	0	0	0	0	0	0	0	0	0	0	0	0	0	1	18	6	154	10	0	0
10710	861	202	970	734	17	1	4	0	84	12	48	409	7	13	80	0	1	2	1	1	0	0	1	2	0	0	0	0	0	0	0	0	0	0	0	0	0	0	0	0	0	0	51	147	266	1910	765	20	6
10568	24	39	54	113	41	160	1962	235	263	1767	7	131	43	15	5095	1	16	15	3	12	7	11	12	14	0	0	52	0	0	0	0	0	0	0	0	1	1	0	0	0	0	1	10	17	16	92	23	49	2734
10567	1	0	0	2	1	3	49	6	7	54	0	1	4	0	124	0	1	0	0	0	0	0	1	0	0	0	0	0	0	0	0	0	0	0	0	0	0	0	0	0	0	0	1	0	1	2	1	0	81
10566	2	0	0	3	1	2	27	5	5	58	0	5	2	1	112	0	0	0	0	0	0	0	0	0	0	0	0	0	0	0	0	0	0	0	0	0	0	0	0	0	0	0	1	1	1	1	0	0	62
10575	0	0	0	2	0	12	8	71	0	27	0	1	0	0	84	0	0	0	0	0	0	0	0	0	0	0	0	0	0	0	0	0	0	0	0	0	0	0	0	0	0	0	0	0	0	0	0	1	12
10501	0	0	1	1	1	0	0	0	1	1	1	2	0	1	1	0	1	2	2	2	2	0	3	55	0	0	0	0	0	0	0	0	0	0	0	0	0	0	0	0	0	0	0	1	0	0	0	0	0
3685	0	0	0	0	4	0	0	0	0	0	0	0	0	2	0	0	2	1	0	0	0	0	1	0	0	0	0	0	0	0	0	0	0	0	0	0	0	0	0	0	0	0	4	11	131	9	54	0	0
13205	8	7	0	18	3	0	10	7	8	2	2	3	42	11	5	284	653	838	368	1026	533	803	1933	1320	0	0	0	1	0	0	0	0	0	0	0	0	0	1	0	0	0	0	1	0	2	6	0	0	0
13208	0	0	0	0	0	0	0	0	0	1	0	1	2	0	3	13	46	45	13	55	45	32	115	60	0	0	0	0	0	0	0	0	0	0	0	0	0	0	0	0	0	0	0	0	0	0	0	0	0
10682	87	156	833	484	29	0	0	1	287	0	0	17	0	0	1	0	0	0	0	0	0	0	0	0	0	0	0	0	0	0	0	0	0	0	0	0	0	0	0	0	0	0	2	9	12	23	333	16	4
12368	68	0	213	436	1	0	0	0	0	0	0	2	0	1	0	0	0	0	0	0	0	0	0	0	0	0	0	0	0	0	0	0	0	0	0	0	0	0	0	0	0	0	0	3	14	1	581	0	1
8256	0	0	11	2	0	0	0	0	19	0	0	2	1	0	2	0	0	0	0	0	0	0	0	0	0	0	0	0	0	0	0	0	0	0	0	0	0	0	0	0	0	0	1	2	10	3	3	11	50
8250	2	0	1	18	0	0	66	7	8	40	0	17	0	5	110	0	0	0	0	0	1	0	0	0	0	0	0	0	0	0	0	0	0	0	0	0	0	0	0	0	0	0	0	0	0	4	0	1	8
20771	2	14	7	6	0	0	0	1	8	0	0	156	93	1	2	0	0	1	1	0	3	0	1	0	0	0	0	0	0	0	0	0	0	0	0	0	0	0	0	0	0	0	0	3	2	47	12	0	0
12403	15	20	0	2	0	0	3	2	3	17	0	22	0	36	22	0	0	0	0	0	0	0	0	0	0	0	0	0	0	0	0	0	0	0	0	0	0	0	0	0	0	0	0	0	0	15	0	0	16
10679	228	35	67	68	1	0	0	0	0	0	0	132	0	0	3	0	0	0	0	0	0	0	0	0	0	0	0	0	0	0	0	0	0	0	0	0	0	0	0	0	0	0	0	0	6	67	4	0	0
2147	9	19	8	13	3	0	14	0	0	12	0	4	0	275	31	0	0	0	0	0	0	0	0	0	0	0	0	0	0	0	0	0	0	0	0	0	0	0	0	0	0	0	0	0	0	1	0	1	24
12367	16	0	79	5	1	0	0	1	0	0	0	26	2	0	0	0	0	0	0	0	0	0	0	0	0	0	0	0	0	0	0	0	0	0	0	0	0	0	0	0	0	0	0	2	1	0	57	1	0
21005	202	348	451	382	36	0	0	0	6	1	0	27	0	2	4	0	0	0	0	0	0	0	1	0	0	0	0	0	0	0	0	0	0	0	0	0	0	0	0	0	0	0	29	22	169	208	323	0	0
10068	1	8	54	1	1	0	12	0	36	9	0	25	0	6	13	0	0	0	0	0	0	0	0	0	0	0	0	0	0	0	0	0	0	0	0	0	0	0	0	0	0	0	0	6	0	10	9	471	30
8247	0	8	0	0	0	0	0	0	0	1	0	2	0	0	1	0	0	0	0	1	0	0	0	0	0	0	0	0	0	0	0	0	0	0	0	0	0	0	0	0	0	0	1	2	0	1	0	0	232
9796	81	63	206	115	57	0	1	0	0	2	0	5	7	2	0	0	0	0	0	0	0	3	0	0	0	0	0	0	0	0	0	0	0	0	0	0	0	0	0	0	0	0	0	32	22	38	262	3	12
21008	242	206	169	217	44	0	0	0	0	0	0	2	0	1	0	0	0	0	0	0	0	0	0	0	0	0	0	0	0	0	0	0	0	0	0	0	0	0	0	0	0	0	0	18	28	6	187	0	0
9959	125	24	53	75	0	0	0	0	0	1	3	14	0	1	1	0	0	0	0	0	0	0	0	0	0	0	0	0	0	0	0	0	0	0	0	0	0	0	0	0	0	0	6	44	71	110	33	3	1
9806	19	23	38	9	4	0	25	1	4	236	0	13	0	2	0	0	0	0	0	0	0	0	0	0	0	0	0	0	0	0	0	0	0	0	0	0	0	0	0	0	0	0	0	3	0	4	18	340	14
20776	11	35	23	0	1	0	2	0	45	0	0	39	17	1	10	0	0	0	0	0	0	1	0	1	0	0	0	0	0	0	0	0	0	0	0	0	0	0	0	0	0	0	7	1	8	40	7	0	0
20886	2	0	6	1	0	0	0	0	2	5	0	25	0	0	14	0	0	0	0	0	0	0	0	0	0	0	0	0	0	0	0	0	0	0	0	0	0	0	0	0	0	0	3	0	0	24	0	0	4
370	10	3	17	1	0	0	0	0	4	1	0	189	0	0	2	1	0	0	0	0	0	0	0	0	0	0	0	0	0	0	0	0	0	0	0	0	0	0	0	0	0	0	1	0	0	108	0	0	0
12413	0	0	0	0	0	0	0	0	0	0	0	0	0	0	0	0	0	0	0	0	0	0	0	0	0	0	0	0	0	0	0	0	0	0	0	0	0	0	0	0	0	0	0	0	0	0	0	0	0
9198	155	106	79	129	58	0	0	0	0	0	0	2	0	0	1	0	0	0	0	0	0	0	0	0	0	0	0	0	0	0	0	0	0	0	0	0	0	0	0	0	0	0	48	181	375	12	280	0	0
6282	27	6	34	23	17	0	6	0	0	0	0	1	0	16	5	1	0	0	0	0	0	0	0	0	0	0	0	0	0	0	0	0	0	0	0	0	0	0	0	0	0	0	0	1	0	8	41	141	0
6272	4	13	329	16	3	0	0	0	0	0	0	51	0	0	0	0	0	0	0	0	0	0	0	0	0	0	0	0	0	0	0	0	0	0	0	0	0	0	0	0	0	0	0	0	0	6	0	0	0
10894	3	0	2	28	1	0	0	0	0	0	0	0	0	0	0	0	0	0	0	0	0	0	0	0	0	0	0	0	0	0	0	0	0	0	0	0	0	0	0	0	0	0	0	2	1	0	114	0	0
8253	438	128	57	129	9	0	0	0	1	0	0	993	1	1	3	1	0	0	0	1	0	0	0	0	0	0	0	0	0	0	0	0	0	0	0	0	0	0	0	0	0	0	120	295	380	383	135	0	0
8641	56	16	6	17	1	0	0	0	5	1	0	38	0	1	0	0	0	0	0	0	0	0	0	1	0	0	0	0	0	0	0	0	0	0	0	0	0	0	0	0	0	0	97	102	340	248	427	0	0
6702	4	0	45	26	21	0	0	0	0	0	0	1	0	0	0	0	0	0	0	0	0	0	0	0	0	0	0	0	0	0	0	0	0	0	0	0	0	0	0	0	0	0	1	23	6	5	287	0	1
13256	176	54	608	281	10	1	1	1	96	6	0	575	3	1	9	0	0	0	0	0	0	0	0	0	0	0	0	0	0	0	0	0	0	0	0	0	0	0	0	0	0	0	0	26	20	293	251	5	2
13648	159	33	3	142	4	0	0	1	1	0	0	298	12	0	8	1	1	0	0	0	0	0	0	2	0	0	0	0	0	0	0	0	0	0	0	0	0	0	0	0	0	0	399	446	1305	469	434	1	0
4148	40	17	2	14	0	0	0	0	0	0	0	169	6	3	0	0	0	0	0	0	0	0	0	0	0	0	0	0	0	0	0	0	0	0	0	0	0	0	0	0	0	0	0	3	27	11	252	0	0
13655	4	0	6	1229	0	0	0	0	0	1	0	3	0	0	0	0	0	0	0	0	0	0	0	0	0	0	0	0	0	0	0	0	0	0	0	0	0	0	0	0	0	0	0	1	13	0	3	0	0
3104	130	11	21	65	1	0	0	0	0	0	0	48	0	0	0	0	0	0	0	0	0	0	0	0	0	0	0	0	0	0	0	0	0	0	0	0	0	0	0	0	0	0	46	80	491	49	50	0	0
15105	4	6	1	6	1	0	0	0	0	0	0	27	6	0	0	0	0	0	0	0	0	0	0	0	0	0	0	0	1	0	0	0	0	0	0	0	0	0	0	0	0	0	1	3	1	16	403	0	0
15106	1	0	0	3	0	0	0	0	0	0	0	1	0	0	0	21	130	148	41	24	54	134	71	157	0	0	0	0	0	0	0	0	0	0	0	0	0	0	0	0	0	0	0	0	0	0	0	0	0
23207	54	11	2	23	2	0	0	0	0	0	0	4	0	0	2	0	0	0	0	0	0	0	0	1	0	0	0	0	0	0	0	0	0	0	0	0	0	0	0	0	0	0	140	109	363	21	45	2	0
23206	102	27	6	38	2	0	0	0	1	1	0	1	0	0	0	0	0	0	0	0	0	0	0	0	0	0	0	0	0	0	0	0	0	0	0	0	0	0	0	0	0	0	41	19	124	10	10	0	0
23210	206	37	11	87	8	0	0	0	0	0	0	11	0	0	0	0	0	0	0	0	0	0	0	0	0	0	0	0	0	0	0	0	0	0	0	0	0	0	0	0	0	0	14	9	14	1	9	0	0
4495	1	0	0	1	0	0	0	0	0	0	0	0	0	0	0	0	0	0	0	0	0	0	0	0	0	0	0	0	0	0	0	0	0	0	0	0	0	0	0	0	0	0	7	5	6	3	0	0	0
134	101	9	68	26	5	0	0	1	0	1	0	30	0	0	3	0	0	0	0	2	0	0	0	1	0	0	0	0	0	0	0	0	0	0	0	0	0	0	0	0	0	0	0	19	8	64	13	0	12
9191	178	13	290	8	0	0	0	0	0	0	0	0	0	1	0	0	0	0	0	0	0	0	0	1	0	0	0	0	0	0	0	0	0	0	0	0	0	0	0	0	0	0	2	10	29	70	85	0	0
1604	0	29	8	0	9	0	0	0	11	3	0	0	0	0	0	0	1	1	1	1	3	3	1	17	0	0	0	0	0	0	0	0	0	0	0	0	0	0	0	0	0	0	0	57	4	0	2	0	1
4335	465	75	20	514	27	0	0	2	213	8	0	478	9	3	12	0	0	0	0	0	0	0	0	0	0	0	0	0	0	0	0	0	0	0	0	0	0	0	0	0	0	0	3	30	313	1147	5	1	8
7178	601	348	138	67	90	1	34	7	731	46	4	164	119	25	77	0	0	1	0	0	1	0	4	1	0	0	0	0	0	0	0	0	0	0	0	0	0	0	0	0	0	0	402	361	382	356	233	0	2
13757	38	185	10	22	671	0	1	0	9	5	0	28	0	1	2	0	0	0	0	0	0	0	0	0	0	0	0	0	0	0	0	0	0	0	0	0	0	0	0	0	0	0	3	11	1	14	7	0	0
11177	3	0	0	14	0	0	0	0	111	0	0	125	0	0	0	0	0	0	0	0	1	0	0	0	0	0	0	0	0	0	0	0	0	0	0	0	0	0	0	0	0	0	3	4	21	97	64	5	0
17065	68	26	21	24	7	0	0	0	4	2	0	5	0	0	7	0	0	0	0	0	0	0	0	0	0	0	0	0	0	0	0	0	0	0	0	0	0	0	0	0	0	0	37	49	108	37	122	0	0
13758	15	3	7	49	3	0	0	0	0	0	0	5	2	1	4	0	0	0	0	0	0	0	0	0	0	0	0	0	0	0	0	0	0	0	0	0	0	0	0	0	0	0	1	11	71	51	11	0	0
17066	59	20	12	22	8	0	0	0	8	0	0	3	1	0	5	0	0	0	0	0	0	0	0	0	0	0	0	0	0	0	0	0	0	0	0	0	0	0	0	0	0	0	35	40	80	32	123	4	0
26583	413	440	371	221	662	859	424	616	1590	937	172	1095	500	3617	1352	0	5	1	1	6	2	0	2	2	1	0	1	0	0	1	0	0	1	0	0	0	2	0	0	0	0	0	629	870	485	4925	701	194	505
21260	667	652	195	613	133	7	54	59	2821	139	5	547	407	231	913	1	3	3	1	1	1	1	2	4	0	0	0	0	0	0	0	0	0	0	0	0	0	0	0	0	0	0	909	1356	789	1651	2813	31	40
16534	4912	1678	1461	1616	776	0	0	26	127	97	3	153	126	90	288	0	4	0	0	0	1	0	0	0	0	0	0	0	0	0	0	0	0	0	0	0	0	0	0	0	0	0	876	1584	1420	707	2426	34	8
21130	1	5	0	2	0	540	9	13	103	21	33	9	1	136	137	1	1	2	0	1	1	1	0	0	0	0	0	1	0	0	0	0	0	0	1	1	1	0	0	0	0	0	0	7	3	15	6	3	17
21029	919	978	205	458	340	6	72	36	249	79	2	298	265	167	462	2	9	1	1	5	1	10	3	11	0	0	0	0	0	0	0	10	0	0	0	0	0	0	0	0	0	0	620	580	560	499	483	4	17
2304	1338	1452	483	587	815	26	0	68	50	159	1102	187	144	744	294	0	1	1	0	2	2	19	6	0	3	0	0	0	0	0	0	0	0	0	0	0	0	0	0	0	0	0	167	182	79	28	58	7	10
3218	1112	1188	429	1924	373	4	29	36	73	75	2	430	137	80	320	0	2	2	0	0	2	0	2	0	0	0	0	0	0	0	0	0	0	0	0	0	0	0	0	0	0	0	563	481	926	406	272	6	5
17137	712	653	277	178	188	0	0	10	5	3	0	8	0	8	15	0	0	0	0	0	0	0	0	0	1	0	0	0	0	0	0	0	0	0	0	0	0	0	0	0	0	0	376	321	236	98	345	8	3
9572	318	69	609	355	310	0	0	0	3	7	0	4	19	37	1	1	0	0	0	0	0	0	1	1	0	0	0	0	0	0	0	0	0	0	0	0	0	0	0	0	0	0	4	45	16	1	94	56	0
742	25	5	41	14	6	3	22	2	2	6	0	5	1	5	16	0	0	1	0	0	0	2	0	2	0	0	0	0	0	0	0	0	0	0	0	0	0	0	0	0	0	0	8	10	14	9	2	35	11
21154	9	9	11	9	21	29	11	16	47	23	8	26	14	110	44	0	0	0	0	0	0	0	0	0	0	0	0	0	0	0	0	0	0	0	0	0	0	0	0	0	0	0	14	24	17	158	14	5	20
13056	263	232	94	359	105	0	0	0	3	4	0	18	6	3	9	0	0	0	0	0	0	0	3	0	0	0	0	0	0	0	0	0	0	0	0	0	0	0	0	0	0	0	129	86	419	41	116	3	2
21157	11	19	9	3	21	23	7	11	40	31	11	27	14	73	33	0	0	0	0	0	0	0	0	1	0	0	0	0	0	0	0	0	0	0	0	0	0	0	0	0	0	0	11	17	9	122	16	5	14
8798	276	0	40	363	0	0	0	0	0	0	0	2	0	1	0	0	0	0	1	2	1	4	3	0	0	0	0	0	0	0	0	0	0	0	0	0	0	0	0	0	0	0	0	50	68	7	458	53	0
10299	6	9	3	6	8	10	9	9	25	14	3	14	7	48	17	0	0	0	0	0	0	0	1	0	0	0	0	0	0	0	0	0	0	0	0	0	0	0	0	0	0	0	8	14	7	91	6	0	12
570	28	24	25	116	25	1	0	0	0	0	0	2	6	0	0	0	0	1	0	0	0	12	5	2	0	0	0	0	0	0	0	0	0	0	0	0	0	0	0	0	0	0	59	72	115	33	133	0	1
7327	2	2	0	1	0	0	0	0	2	0	0	0	0	0	1	0	0	0	0	0	0	0	0	0	0	0	0	0	0	0	0	0	0	0	0	0	0	0	0	0	0	0	52	0	0	3	0	0	0
21153	1	0	1	0	3	0	0	0	7	2	0	3	0	0	5	0	0	0	0	0	0	0	0	0	0	0	0	0	0	0	0	0	0	0	0	0	0	0	0	0	0	0	22	0	1	6	2	0	0
10438	1	3	1	1	1	0	0	0	4	0	0	1	0	0	1	0	0	0	0	0	0	0	0	0	0	0	0	0	0	0	0	0	0	0	0	0	0	0	0	0	0	0	37	2	2	1	6	0	0
10439	0	1	1	1	1	0	0	0	10	0	0	0	1	1	2	0	0	0	0	0	0	0	0	0	0	0	0	0	0	0	0	0	0	0	0	0	0	0	0	0	0	0	44	6	1	2	4	0	0
21262	26	16	7	12	7	0	0	1	69	6	0	12	22	5	33	0	0	0	0	0	0	0	0	0	0	0	0	0	0	0	0	0	0	0	0	0	0	0	0	0	0	0	27	36	22	40	86	2	0
21084	39	1	90	62	1	0	0	1	0	0	0	28	16	0	3	0	3	3	1	1	0	7	4	1	0	0	0	0	0	0	0	34	0	0	0	0	0	0	0	0	0	0	54	7	20	16	43	0	0
10444	22	22	4	15	6	0	1	2	59	5	0	13	9	3	24	0	0	0	0	0	0	0	0	0	0	0	0	0	0	0	0	0	0	0	0	0	0	0	0	0	0	0	28	48	16	46	52	0	1
25672	1	1	0	0	1	0	3	0	2	1	1	2	1	13	1	0	0	0	0	0	0	0	0	0	0	0	0	0	0	0	0	0	0	0	0	0	0	0	0	0	0	0	28	3	2	10	1	0	2
21161	0	1	0	1	0	66	0	1	0	7	0	4	0	1	6	0	0	0	0	0	1	0	1	0	0	0	0	0	0	0	0	0	0	0	0	0	0	0	0	0	0	0	9	1	2	8	0	0	0
7325	3	0	0	0	1	0	0	0	2	0	0	1	0	0	2	0	0	0	0	0	0	0	0	0	0	0	0	0	0	0	0	0	0	0	0	0	0	0	0	0	0	0	65	0	1	1	5	0	0
21087	32	16	53	56	9	0	0	0	9	0	5	76	128	6	5	4	7	21	1	1	3	47	10	12	2	0	2	2	0	3	0	2	0	1	3	1	2	3	1	1	1	0	21	19	20	38	11	0	1
10120	86	0	152	81	1	0	0	0	0	0	0	16	7	1	0	0	1	0	0	3	0	4	1	0	0	0	0	0	0	0	0	0	0	0	0	0	0	0	0	0	0	0	3	1	6	1	39	0	0
10164	51	1	59	120	11	0	0	1	0	0	0	5	2	0	0	0	2	0	0	0	2	2	2	0	0	0	0	0	0	0	0	0	0	0	0	0	0	0	0	0	0	0	7	6	3	0	13	49	0
10166	160	37	83	103	214	1	0	0	0	0	0	0	0	0	0	0	0	0	0	0	0	0	0	0	0	0	0	0	0	0	0	0	0	0	0	0	0	0	0	0	0	0	5	61	18	0	20	0	0
25670	4	1	2	1	5	4	3	3	8	6	1	12	2	20	14	0	0	0	0	0	0	0	0	0	0	0	0	0	0	0	0	0	0	0	0	0	0	0	0	0	0	0	3	8	1	37	2	0	2
10441	9	7	9	9	2	0	1	2	42	0	0	4	5	3	17	0	0	0	0	0	0	0	0	0	0	0	0	0	0	0	0	0	0	0	0	0	0	0	0	0	0	0	15	20	5	24	41	0	1
10303	0	0	4	1	5	29	1	0	7	4	0	4	0	10	7	0	0	0	0	0	0	0	0	0	0	0	0	0	0	0	0	0	0	0	0	0	0	0	0	0	0	0	5	2	1	39	2	1	2
10123	88	30	82	38	34	0	0	1	1	0	0	1	0	9	1	0	0	0	0	0	0	0	0	0	0	0	0	0	0	0	0	0	0	0	0	0	0	0	0	0	0	0	8	82	5	4	34	2	0
21158	2	0	4	0	0	0	0	0	5	1	2	1	1	18	1	0	0	0	0	0	0	0	0	0	0	0	0	0	0	0	0	0	0	0	0	0	0	0	0	0	0	0	54	5	1	9	4	0	0
26589	1	1	1	0	3	2	4	0	6	8	0	5	6	16	10	0	0	0	0	1	0	0	0	0	0	0	0	0	0	0	0	0	0	0	0	0	0	0	0	0	0	0	10	9	1	21	5	4	1
6938	4	2	4	0	1	0	0	0	0	0	0	3	0	1	1	0	0	0	0	0	0	0	0	0	0	0	0	0	0	0	0	0	0	0	0	0	0	0	0	0	0	0	0	1	491	2	4	0	0
13059	178	45	16	73	24	0	0	0	0	0	0	0	0	0	0	0	0	0	0	0	0	0	0	0	0	0	0	0	0	0	0	0	0	0	0	0	0	0	0	0	0	0	4	56	1	4	21	1	0
21156	1	2	4	2	3	1	3	5	5	4	3	4	1	23	1	0	0	0	0	0	0	0	0	0	0	0	0	0	0	0	0	0	0	0	0	0	0	0	0	0	0	0	1	5	2	28	1	0	1
21131	0	0	0	0	0	13	0	0	0	1	1	0	0	4	5	0	0	0	0	0	0	0	0	0	0	0	0	0	0	0	0	0	0	0	0	0	0	0	0	0	0	0	0	0	0	0	0	0	0
10175	1	0	2	2	0	0	0	0	2	0	1	1	0	1	0	0	0	0	0	0	0	0	0	0	0	0	0	0	0	0	0	0	0	0	0	0	0	0	0	0	0	0	21	2	0	1	0	0	0
21132	0	0	0	0	0	12	0	0	0	3	1	1	0	3	2	0	0	0	0	0	0	0	0	0	0	0	0	0	0	0	0	0	0	0	0	0	0	0	0	0	0	0	0	0	0	0	0	0	0
21031	19	27	5	16	8	0	0	0	3	2	0	6	4	5	11	0	0	0	0	1	0	0	0	0	0	0	0	0	0	0	0	0	0	0	0	0	0	0	0	0	0	0	20	16	16	9	22	0	1
7169	0	0	407	4	24	0	0	0	0	0	0	0	1	0	1	0	0	0	0	0	0	0	0	0	0	0	0	0	0	0	0	0	0	0	0	0	0	0	0	0	0	0	0	9	3	1	63	0	0
9190	2	2	9	2	6	1	0	0	0	0	0	3	94	2	0	1	0	1	0	0	1	0	1	0	0	0	0	0	0	0	0	0	0	0	0	0	0	0	0	0	0	0	2	1	0	1	862	0	0
2715	11	102	115	28	11	2	0	3	18	0	0	8	0	1	1	1	2	0	1	0	2	1	0	2	0	0	1	0	0	0	0	0	0	0	0	0	2	0	0	0	438	0	18	49	122	53	67	9	0
17140	14	15	19	14	4	0	0	0	1	1	0	0	0	0	0	0	6	0	0	0	0	0	0	2	0	0	0	0	0	0	0	0	0	0	0	0	0	0	0	0	0	0	45	18	54	1	36	0	1
15085	0	2	0	0	1	0	1	0	0	0	0	0	0	0	0	0	0	0	0	0	0	0	0	0	0	0	0	0	0	0	0	0	0	0	0	0	0	0	0	0	0	0	294	24	36	2	15	0	0
15087	1	2	1	1	0	0	1	0	3	0	0	0	0	0	0	0	0	0	0	1	0	0	0	1	0	0	0	0	0	0	0	0	0	0	0	0	0	0	0	0	0	0	236	34	17	0	24	0	0
18628	0	0	0	0	0	0	0	0	0	0	0	0	0	0	0	0	0	0	0	0	0	13	1	2	0	0	0	0	0	0	0	0	0	0	0	0	0	0	0	0	0	0	0	0	0	0	0	0	0
6660	15	33	611	7	41	1	0	1	1	2	0	1	2	1	0	0	0	0	0	2	0	0	1	0	1	0	1	0	0	0	0	0	0	0	0	0	0	0	0	0	0	0	3	5	9	7	120	9	1
3955	62	57	21	24	77	34	8	4	25	5	1	7	1	35	22	3	8	5	1	4	4	0	1	4	107	1	7	0	0	0	0	0	0	0	0	0	289	0	0	0	101	0	22	49	93	45	89	3	4
24425	0	2	0	1	0	4	3	0	11	0	0	3	7	1	1	5	30	38	7	5	13	300	53	102	1812	199	249	223	2690	178	3788	531	3265	2	841	7493	1785	0	956	18262	674	328	2	18	12	2	4	3	2
16830	0	0	0	0	0	0	0	0	6	0	0	0	0	0	0	0	13	1	0	0	0	0	6	1	9	0	0	0	2984	292	236	1626	793	0	0	3140	0	0	2386	531	0	0	2	5	9	4	2	1	0
11416	1	0	8	10	6	0	4	0	3	1	0	0	1	0	2	0	1	1	0	0	0	0	0	0	0	0	0	0	0	0	0	0	0	0	0	0	0	0	0	0	0	0	10427	172	84	0	24	0	0
4351	60	6	26	115	6	0	0	0	38	0	0	1	0	0	4	0	2	1	1	0	1	0	5	1	0	0	0	0	0	0	0	0	0	0	0	0	0	0	0	0	0	0	10	35	113	19	244	15	0
8441	1	10	59	7	41	1	0	0	10	0	0	0	0	4	1	0	0	1	0	0	2	0	0	0	34	0	0	0	0	0	0	0	0	0	2	0	217	0	0	0	66	0	3	1	22	0	29	2	0
21788	1	3	4	34	3	1	0	0	1	0	0	8	0	0	3	1	0	0	0	0	0	0	0	0	0	0	0	0	0	0	0	0	0	0	0	0	0	0	0	0	0	0	1676	27	17	1	14	0	0
11421	4	106	33	12	19	0	24	3	5	3	0	1	0	1	0	0	0	0	0	0	0	0	0	0	0	0	0	0	0	0	0	0	0	0	0	0	0	0	0	0	0	0	629	90	25	3	27	0	0
18565	9	21	20	8	4	1	3	3	40	0	1	2	13	0	3	0	1	0	1	0	0	0	1	52	439	0	5	0	0	0	0	0	0	0	24	0	11	0	0	0	264	28	3	4	2	2	31	0	0
3953	262	93	82	96	11	0	1	22	68	42	2	258	12	33	51	2	16	8	0	4	6	1	9	11	0	0	0	0	0	0	0	0	0	0	0	0	0	0	0	0	0	0	1	8	0	7	3	0	0
24427	0	0	0	0	0	0	0	0	1	0	0	0	0	0	0	0	1	0	0	0	1	3	1	2	39	8	7	6	72	8	93	11	92	0	24	219	63	0	25	569	23	3	0	0	0	0	0	0	0
4150	6	66	32	2	6	0	0	0	4	0	2	9	5	3	0	0	1	0	1	1	3	0	0	0	5	0	0	0	0	0	0	0	0	0	0	0	0	0	0	0	0	0	31	9	63	9	109	4	0
21789	0	4	5	1	0	0	0	66	0	2	0	1	0	0	6	0	0	0	0	0	0	0	0	0	0	0	0	0	0	0	0	0	0	0	0	0	0	0	0	0	0	0	3	4	0	0	0	0	70
24428	0	0	0	0	0	0	0	0	0	0	0	0	0	0	0	0	0	0	0	0	0	2	0	2	36	2	13	6	65	3	68	14	68	0	31	189	45	0	24	386	14	6	0	0	0	0	0	0	0
24431	0	0	0	0	0	0	0	0	1	0	0	0	0	0	0	0	1	1	0	0	0	1	0	0	36	8	1	8	69	2	73	13	66	0	28	155	37	0	20	393	19	7	0	1	0	0	0	0	0
2312	1	0	4	11	0	1	0	0	3	0	0	3	0	1	0	0	0	0	0	0	0	0	0	0	0	0	0	0	0	0	0	0	0	0	0	0	0	0	0	0	0	0	428	186	297	2	3	0	0
18561	1	2	0	1	0	0	74	2	0	0	0	1	214	1	1	0	0	0	1	0	1	0	7	0	125	0	301	105	0	0	0	0	0	0	0	0	0	0	0	0	36	0	0	0	0	0	0	0	0
18562	0	0	0	2	1	0	0	0	0	0	6	0	29	1	3	0	0	0	0	0	0	0	0	2	0	0	0	0	3	0	2	0	2	0	0	3	1	0	1	18	0	0	0	0	0	0	0	0	0
14228	170	74	4622	8	608	0	0	2	48	4	3	3	37	0	2	2	5	1	0	8	3	1	6	2	0	0	0	0	0	0	0	0	0	0	0	0	0	0	0	0	0	0	15	0	3	113	152	3	2
22999	19	185	4868	95	46	0	3	2	74	5	0	15	2	2	8	1	8	9	2	3	4	2	9	5	0	0	0	0	0	0	0	0	0	0	0	0	0	0	0	0	0	0	2	1	6	19	26	1	1
23329	33	15	4143	1	5	1	0	3	66	4	0	1	1	0	36	2	2	2	0	3	1	0	1	0	0	0	0	0	0	0	0	0	0	0	0	0	0	0	0	0	0	0	3	1	4	8	16	13	2
23176	16	41	1765	6	18	0	5	0	49	3	0	14	1	2	2	0	1	0	0	0	0	0	0	5	0	0	0	0	0	0	0	0	0	0	0	0	24	0	0	0	1	0	0	1	12	5	29	0	0
23048	5	0	41	11	3	0	0	0	1	0	0	3	4	0	0	0	0	5	0	0	0	0	2	5	0	0	0	0	0	0	0	0	0	0	0	0	0	0	0	0	0	0	3	1	19	1	0	25	0
23181	67	1	179	220	19	0	0	0	1	0	0	0	0	0	0	0	0	1	0	0	1	2	4	1	0	0	0	0	0	0	0	0	0	0	0	0	0	0	0	0	0	0	41	25	10	0	154	109	0
23143	1	1	10	3	0	0	9	0	118	0	0	0	0	0	1	0	1	0	0	0	0	0	1	0	0	0	0	0	0	0	0	0	0	0	0	0	0	0	0	0	0	0	4	57	0	6	5	0	0
16300	0	0	11	0	0	0	0	0	0	0	0	0	0	0	0	0	0	0	0	0	0	0	0	0	0	0	0	0	0	0	0	0	0	0	0	0	0	0	0	0	0	0	0	0	0	0	0	0	0
23144	22	0	2	0	1	0	2	0	0	0	0	18	5	0	2	0	2	2	0	1	1	0	1	3	0	0	0	0	0	0	0	0	0	0	0	0	0	0	0	0	0	0	24	9	4	37	5	0	0
15690	0	0	117	0	1	0	0	0	0	0	0	1	0	0	0	0	0	0	0	1	0	0	0	0	0	0	0	0	0	0	0	0	0	0	0	0	0	0	0	0	0	0	0	0	0	0	0	0	0
23179	1	0	17	2	0	0	0	0	1	0	0	0	0	0	0	0	0	1	0	0	0	0	0	0	0	0	0	0	0	0	0	0	0	0	0	0	0	0	0	0	0	0	1	4	65	0	4	1	0
14232	8	3	126	0	7	0	0	0	0	0	0	0	1	0	0	0	0	0	0	0	0	0	0	0	0	0	0	0	0	0	0	0	0	0	0	0	0	0	0	0	0	0	0	0	0	1	5	0	0
23052	0	0	0	0	0	0	0	0	0	0	0	0	0	0	1	0	0	0	0	0	0	0	0	0	0	0	0	0	0	0	0	0	0	0	0	0	0	0	0	0	0	0	0	0	0	2	0	0	1
23003	1	2	124	4	2	0	0	0	8	0	0	0	0	0	0	0	0	0	0	0	0	0	0	0	0	0	0	0	0	0	0	0	0	0	0	0	0	0	0	0	0	0	1	0	0	0	0	0	0
14233	2	2	88	0	14	0	0	0	1	0	0	0	1	0	0	0	0	0	0	0	1	0	0	0	0	0	0	0	0	0	0	0	0	0	0	0	0	0	0	0	0	0	0	0	0	1	8	0	0
15696	0	6	84	3	3	0	0	0	3	1	0	0	0	0	0	1	1	0	0	0	2	0	0	0	0	0	0	0	0	0	0	0	0	0	0	0	0	0	0	0	0	0	0	0	0	2	1	0	0
23336	0	0	131	0	0	0	0	0	1	0	0	0	0	0	1	0	0	0	0	0	1	0	0	0	0	0	0	0	0	0	0	0	0	0	0	0	0	0	0	0	0	0	0	0	0	0	2	0	0
23332	1	1	94	0	0	0	0	0	1	0	0	0	1	0	2	0	0	0	0	0	0	0	0	0	0	0	0	0	0	0	0	0	0	0	0	0	0	0	0	0	0	0	0	0	0	0	0	0	0
18560	23	7	1	3	2	1	12	2	2	2	2	8	8	14	10	205	1185	1168	166	460	1998	967	1468	2086	0	0	0	0	0	1	0	0	0	0	0	0	0	0	0	0	0	0	2	1	11	2	3	0	0
24426	20	103	122	17	49	1	0	23	13	2	2	14	25	23	3	0	0	1	0	0	1	0	0	0	0	0	23	1	1	0	2	0	0	0	0	1	289	0	0	1	72	0	41	1	75	10	34	3	0
23401	4	0	0	2	0	0	3	0	9	3	0	0	0	0	1	84	449	428	70	266	197	156	304	258	0	0	0	0	0	0	0	0	0	0	0	0	0	0	0	0	0	0	0	3	8	0	0	0	1
23374	2	0	2	6	2	0	0	0	0	1	1	0	1	2	3	80	344	331	46	160	149	193	208	263	0	0	0	0	0	0	0	0	0	0	0	0	0	0	0	0	0	0	0	0	0	0	0	0	0
23400	4	0	0	4	1	0	0	1	0	3	0	1	0	0	0	39	195	172	37	152	97	147	103	139	0	0	0	0	0	0	0	0	0	0	0	0	0	0	0	0	0	0	0	0	1	0	0	0	0
23373	2	0	0	1	0	0	0	0	3	0	0	0	0	0	0	34	146	156	20	73	45	89	80	115	0	0	0	0	0	0	0	0	0	0	0	0	0	0	0	0	0	0	0	0	0	0	4	0	0
16299	0	1	0	1	0	1	0	0	0	5	0	0	0	0	0	11	61	100	16	62	24	41	68	76	0	0	0	1	0	0	0	0	0	0	0	0	0	0	0	0	0	0	0	0	1	6	0	0	1
23080	96	290	2873	26	43	2	23	5	93	14	7	11	10	14	42	2	1	3	1	1	5	0	3	4	0	0	2	0	0	0	0	0	0	0	0	0	0	0	0	0	0	0	75	86	356	245	304	10	15
16353	0	0	0	1	0	3	0	0	6	0	3	0	0	2	2	0	0	2	1	0	1	0	1	1	455	0	0	0	218	0	0	0	0	0	564	0	838	0	116	0	1168	0	1	3	13	9	26	0	0
16360	71	176	116	34	36	6	1	5	19	11	13	42	4	2	21	1	6	5	3	0	4	0	3	0	0	0	0	0	0	0	0	0	0	0	0	0	0	0	0	0	0	0	100	83	144	320	243	13	72
23079	1	9	308	0	2	0	0	2	3	0	0	0	0	1	0	0	0	0	0	0	0	0	1	0	0	0	0	0	0	0	0	0	0	0	0	0	0	0	0	0	0	0	2	1	0	0	9	0	0
23082	0	0	21	0	0	0	0	0	4	0	0	0	0	0	0	0	0	0	0	0	0	0	0	0	0	0	0	0	0	0	0	0	0	0	0	0	0	0	0	0	0	0	0	1	1	0	14	0	0
15750	3	10	118	1	4	0	0	0	2	2	0	0	0	0	4	0	0	0	1	0	0	0	0	0	0	0	0	0	0	0	0	0	0	0	0	0	0	0	0	0	0	0	5	3	14	2	11	1	2
16117	17	37	24	11	12	1	5	5	24	0	0	26	16	1	7	0	4	2	1	0	1	5	0	2	0	0	0	0	0	0	0	0	0	0	0	0	0	0	0	0	0	0	19	41	39	30	52	0	1
16121	39	56	33	31	8	1	2	4	23	0	0	27	147	3	7	3	2	4	0	2	3	5	0	2	0	0	0	0	0	0	0	0	0	0	0	0	0	0	0	0	0	0	8	44	19	22	31	0	0
15744	2	7	16	0	0	0	0	0	2	0	0	0	4	0	0	0	0	0	0	0	0	0	0	0	0	0	0	0	0	0	0	0	0	0	0	0	0	0	0	0	0	0	12	3	36	10	177	2	2
23085	0	11	75	2	3	1	0	0	3	0	2	0	0	0	1	0	0	0	0	0	0	0	0	0	0	0	0	0	0	0	0	0	0	0	0	0	0	0	0	0	0	0	1	2	9	5	10	2	2
18502	41	134	191	33	53	3	0	42	49	11	0	5	6	27	7	0	4	3	0	1	3	1	1	2	0	0	0	0	0	0	0	0	0	0	0	0	0	0	0	0	0	0	152	146	864	73	214	21	2
18503	2	1	28	6	1	0	0	2	2	0	0	0	0	1	0	1	0	1	0	0	1	0	0	0	0	0	0	0	0	0	0	0	0	0	0	0	0	0	0	0	0	0	31	27	69	14	31	0	0
13412	876	383	196	418	168	0	17	9	38	6	6	63	0	1	17	1	4	0	1	0	0	0	1	0	0	0	0	0	0	0	0	0	0	0	0	0	0	0	0	0	0	0	453	331	1677	366	26	0	27
22235	1216	171	229	1742	302	0	0	1	0	0	0	2	0	0	0	0	2	0	0	0	0	0	0	0	0	0	0	0	0	0	0	0	0	0	0	0	0	0	0	0	0	0	32	405	218	2	207	5	0
2721	6	0	1	4	1	0	0	2	3	5	1	1	2	0	5	56	386	339	13	161	173	193	161	366	1	0	0	0	0	0	0	0	0	0	1	0	0	0	0	0	0	0	1	3	1	1	1	0	0
1044	8	0	0	0	0	0	0	0	0	0	0	1	0	0	0	0	0	0	1	0	0	0	1	70	0	0	0	1	0	0	0	0	0	0	0	11	0	15091	0	0	0	0	0	0	0	0	0	0	0
1048	0	0	0	0	0	0	0	0	0	0	0	0	0	0	0	0	0	0	0	0	0	0	0	21	0	0	0	0	0	0	0	0	0	0	0	1	1	2478	0	0	0	0	0	0	0	0	0	0	0
1045	0	0	0	0	0	0	0	0	0	0	1	0	0	0	0	0	0	0	0	0	0	0	0	1294	0	0	0	2	0	0	0	0	0	0	0	0	0	0	0	0	0	588	0	0	0	0	0	0	0
24590	16	5	3	29	1	0	0	5	1	2	1	13	38	0	10	910	3892	5492	1483	6176	2616	2275	4565	1955	0	0	0	0	0	0	1	0	0	0	0	0	0	0	0	0	0	0	4	1	1	3	2	0	4
20106	3	0	0	25	0	1	1	2	3	4	0	7	11	2	6	566	2688	3465	522	1830	1204	1388	2258	1596	0	1	0	0	0	0	0	0	0	0	0	0	0	1	0	0	0	0	0	1	1	9	2	0	1
18735	2	3	7	40	2	0	3	2	5	0	0	29	37	0	2	10	26	76	25	53	26	22	55	19	0	0	0	1	0	0	0	0	0	0	0	0	0	0	0	0	0	0	2	2	3	7	1	0	0
9196	6	0	2	0	0	0	0	3	0	2	0	0	0	0	0	46	250	145	10	67	114	105	101	214	0	0	0	0	0	0	0	0	0	0	0	0	0	0	0	0	0	0	1	0	0	0	1	0	0
18627	4	1	4	13	2	0	0	1	14	2	0	31	37	0	1	11	53	115	34	68	13	34	75	19	0	1	0	0	0	0	0	0	0	0	0	0	0	0	0	0	0	0	5	1	6	6	12	0	0
24566	0	0	0	2	0	0	0	0	0	0	0	1	0	0	1	8	53	99	7	297	139	11	46	33	0	0	0	0	0	0	0	0	0	0	0	0	0	0	0	0	0	0	0	0	0	0	0	0	0
24595	2	0	0	2	0	0	0	0	0	0	0	0	0	0	0	30	121	166	43	174	74	54	104	52	0	0	0	0	0	0	0	0	0	0	0	0	0	0	0	0	0	0	0	0	0	0	0	0	0
9212	0	0	0	0	0	0	0	0	0	0	0	0	0	0	0	1	6	18	0	323	136	1	9	2	0	0	0	0	0	0	0	0	0	0	0	0	0	0	0	0	0	0	0	0	0	0	0	0	0
9197	9	0	0	1	0	0	0	0	2	0	0	1	4	0	2	40	166	142	13	40	101	98	99	171	0	0	0	0	0	0	0	0	0	0	0	0	0	0	0	0	0	0	2	0	0	0	0	0	0
24587	0	0	0	1	0	0	0	2	0	0	0	1	0	0	0	34	122	130	37	150	54	65	95	53	0	0	0	0	0	0	0	0	0	0	0	0	0	0	0	0	0	0	1	0	0	1	0	0	0
24563	0	0	0	1	0	0	0	0	0	0	0	2	0	0	0	22	93	92	25	85	65	70	92	45	0	0	0	0	0	0	0	0	0	0	0	0	0	0	0	0	0	0	0	0	0	0	0	0	0
9207	0	0	0	0	0	0	0	0	0	0	0	0	1	0	0	0	5	26	0	243	100	0	5	2	0	0	0	0	0	0	0	0	0	0	0	0	0	0	0	0	0	0	0	0	0	0	0	0	0
20110	0	1	0	0	0	0	0	0	0	0	0	0	1	0	0	15	62	74	21	63	23	37	54	42	0	0	0	0	0	0	0	0	0	0	0	0	0	0	0	0	0	0	0	0	0	1	0	0	0
20112	0	0	0	1	0	0	0	0	0	0	0	0	0	0	0	16	63	95	4	32	28	29	60	40	0	0	0	0	0	0	0	0	0	0	0	0	0	0	0	0	0	0	1	0	0	0	0	0	0
24548	0	0	0	0	0	0	0	0	0	0	0	0	0	0	0	0	4	16	1	187	82	1	5	0	0	0	0	0	0	0	0	0	0	0	0	0	0	0	0	0	0	0	0	0	0	0	0	0	0
24546	0	0	0	0	0	0	0	0	0	0	0	0	0	0	0	0	7	13	0	174	100	0	4	0	0	0	0	0	0	0	0	0	0	0	0	0	0	0	0	0	0	0	0	0	0	0	0	0	0
12858	33	19	4	22	20	0	7	4	48	4	0	21	15	5	8	1	6	1	0	1	4	3	7	2	0	0	0	0	0	0	0	0	0	0	1	0	0	0	0	0	0	0	20	187	106	39	208	15	0
12898	0	0	0	0	0	0	0	0	0	3	0	0	0	0	0	0	0	1	0	0	0	0	0	1	0	0	0	0	0	0	0	0	0	0	0	0	0	0	0	0	0	0	0	18	0	0	1	0	0
12864	2	0	0	5	0	0	0	0	11	0	0	2	6	1	2	2	2	5	0	0	2	12	3	1	0	0	2	0	0	0	0	0	70	0	179	0	0	0	0	0	445	0	0	1	8	7	0	0	0
12859	2	28	4	3	6	0	0	0	7	0	0	1	0	0	2	1	0	1	0	0	2	0	1	4	0	0	20	0	184	0	0	0	0	0	0	0	0	0	0	0	21	0	10	5	48	19	9	2	1
12860	296	51	2	9	10	0	0	0	10	2	0	10	9	0	0	0	0	2	0	1	2	0	3	6	0	0	0	0	0	0	0	0	0	0	0	0	0	0	0	0	0	1	0	9	7	0	8	0	0
12862	3	22	0	5	2	0	1	0	4	0	0	9	9	0	4	0	0	0	1	0	0	0	0	1	0	0	84	0	0	0	0	0	0	0	0	0	0	0	0	0	242	0	1	6	17	0	0	0	0
12903	0	28	5	1	3	0	0	0	1	0	0	0	0	0	0	0	0	0	0	0	0	3	0	0	0	0	0	0	0	0	0	0	0	0	0	0	0	0	0	0	0	0	0	0	0	1	0	0	0
2739	9	1	2	9	1	0	8	3	5	0	0	6	23	2	1	1	0	0	0	0	0	0	5	0	1	0	0	0	0	0	0	0	319	0	35	0	0	0	0	0	0	0	0	0	7	4	1	0	0
23592	6302	2978	2156	2352	1933	22	172	227	1707	408	39	600	389	691	1126	1	10	1	1	4	0	0	2	5	0	1	0	0	0	0	0	0	0	0	0	0	0	0	0	0	2	0	1185	3064	1550	2327	5045	94	37
26178	1161	290	778	283	303	34	99	77	2403	244	39	1349	976	1105	756	3	8	3	0	6	5	15	1	6	3	0	0	0	2	3	3	1	0	0	3	5	0	1	1	2	0	0	124	295	397	2481	774	95	27
24511	65	93	582	25	192	7230	26	24	17	95	6	28	12	14	165	2	6	6	0	2	2	6	4	12	0	0	0	1	2	3	0	1	0	1	0	2	2	2	1	1	0	0	16	10	48	64	43	1	97
6934	1816	1087	387	370	200	2	19	20	22	41	2	141	99	50	72	0	0	0	0	0	0	0	1	0	0	0	0	0	0	1	0	0	0	0	0	0	0	0	0	0	0	0	1265	429	1763	268	388	4	1
10637	2219	325	185	3049	444	0	0	0	0	1	0	10	26	2	1	0	3	2	0	1	0	2	3	1	0	0	0	0	0	0	0	1	0	0	0	0	0	0	0	0	0	0	69	783	116	6	1044	14	0
16648	110	24	130	32	57	1	2	0	28	10	1	9	0	9	8	0	0	0	0	0	0	0	0	5	0	0	0	1	0	0	1	2	0	0	0	1	0	1	1	1	0	0	193	46	450	174	80	11	3
10638	2002	74	534	2294	368	0	0	0	0	0	0	0	0	3	0	0	0	0	0	0	0	0	1	0	0	0	0	0	0	0	0	0	0	0	0	0	0	0	0	0	0	0	0	4	6	1	279	3	0
3225	38	29	7	66	1	0	0	0	0	0	0	22	9	0	5	0	0	2	0	0	1	0	4	0	0	0	0	0	0	0	0	0	0	0	0	0	0	0	0	0	0	0	136	91	493	46	34	2	0
17096	168	93	75	59	54	0	6	8	34	11	0	14	16	24	33	0	0	0	0	0	0	0	0	0	0	0	0	0	0	0	0	0	0	0	0	0	0	0	0	0	0	0	42	75	43	64	148	1	0
23550	26	5	21	8	7	2	2	5	69	7	1	47	22	26	26	0	1	0	0	0	0	0	0	0	0	0	0	0	0	0	0	0	0	0	0	0	0	0	0	0	0	0	2	8	9	84	17	1	2
7326	19	9	19	13	10	0	0	1	5	1	0	3	1	0	3	0	1	0	0	0	0	0	0	0	0	0	0	0	0	0	0	0	0	0	0	0	0	0	0	0	0	0	76	5	1	15	19	0	0
17100	150	59	57	71	59	0	5	7	45	12	1	15	19	13	25	0	0	0	0	1	0	0	0	0	0	0	0	0	0	0	0	0	0	0	0	0	0	0	0	0	0	0	24	77	43	58	129	2	1
16925	28	10	24	5	8	0	1	0	60	6	0	32	15	20	21	0	0	0	0	1	0	0	0	0	0	0	0	0	0	0	0	0	0	0	0	0	0	0	0	0	0	0	3	7	12	68	17	1	0
10636	202	7	93	690	31	0	0	0	0	0	0	0	0	0	0	0	3	0	0	0	1	0	0	0	0	0	0	0	0	0	0	0	0	0	0	0	0	0	0	0	0	0	2	17	4	0	194	5	0
16928	5	0	15	0	0	0	0	0	8	1	0	14	1	0	1	0	0	0	0	0	0	0	0	0	0	0	0	0	1	0	0	0	0	0	0	0	0	0	0	0	0	0	4	0	2	16	2	0	0
24512	21	22	22	17	24	3	0	1	7	1	0	12	5	0	3	0	1	1	0	1	0	0	0	4	0	0	0	0	1	0	0	0	0	0	0	0	0	0	1	0	0	0	28	56	39	92	172	0	10
6940	155	112	18	31	11	0	0	4	0	1	0	25	24	8	15	0	0	0	0	0	0	0	0	0	0	0	0	0	0	0	0	0	0	0	0	0	0	0	0	0	0	0	31	5	5	1	4	0	0
24514	1	2	9	0	0	148	0	0	1	0	0	0	0	0	4	0	0	0	0	0	0	0	0	0	0	0	0	0	0	0	0	0	0	0	0	0	0	0	0	0	0	0	4	0	0	1	0	0	0
9719	0	0	2	1	0	1	0	0	2	0	0	1	1	0	1	0	0	0	0	0	0	0	0	0	0	0	0	0	0	0	0	0	0	0	0	0	0	0	0	0	0	0	4	1	1	8	1	0	0
16535	124	47	48	49	22	0	0	0	2	2	0	6	5	4	7	0	0	0	0	0	0	0	0	0	0	0	0	0	0	0	0	0	0	0	0	0	0	0	0	0	0	0	30	46	39	19	62	3	1
17098	67	27	32	29	28	0	0	0	0	1	0	4	0	0	3	0	0	0	0	0	0	0	0	0	0	0	0	0	0	0	0	0	0	0	0	0	0	0	0	0	0	0	39	28	139	3	77	0	1
16539	131	41	24	41	22	0	0	2	5	3	0	3	2	4	6	0	0	0	0	0	0	0	0	0	0	0	0	0	0	0	0	0	0	0	0	0	0	0	0	0	0	0	23	44	41	18	46	0	2
24516	1	4	18	0	4	202	0	0	0	2	0	2	1	0	9	0	0	1	0	0	0	0	0	1	0	0	0	0	0	0	0	0	0	0	0	0	0	0	0	0	0	0	0	0	2	2	1	0	5
24513	5	1	15	1	6	207	2	2	0	4	0	0	0	0	3	0	0	0	0	0	0	1	0	1	0	0	0	0	0	0	0	0	0	0	0	0	0	0	0	0	0	0	0	0	0	2	1	0	3
23602	16	2	3	0	0	0	0	0	1	0	0	0	0	1	0	0	0	0	0	0	0	0	0	0	0	0	0	0	0	0	0	0	0	0	0	1	0	0	0	0	0	0	56	1	1	1	0	0	0
26183	5	0	3	2	1	0	0	0	9	0	0	6	3	4	3	0	0	0	0	0	0	0	0	0	0	0	0	0	0	0	0	0	0	0	0	0	0	1	0	0	0	0	0	4	2	13	3	0	1
26126	4219	2531	907	2327	1818	2	71	95	157	62	0	393	37	44	174	1	2	3	1	3	1	0	1	1	0	0	0	0	0	0	0	0	0	0	0	0	0	0	0	0	0	0	1127	3125	2092	1417	1873	47	17
6647	579	417	97	538	75	0	1	5	5	0	0	27	3	4	12	0	0	1	0	0	0	4	1	4	0	0	0	0	0	0	0	0	0	0	0	0	0	0	0	0	0	0	606	351	1485	63	304	5	0
6656	91	18	16	97	53	0	3	8	21	4	0	23	2	2	6	1	1	0	1	1	0	0	0	2	0	0	0	0	0	0	0	0	0	0	0	0	0	0	0	0	0	0	202	325	324	438	477	5	37
16357	4	0	0	2	0	0	0	3	2	1	0	1	0	0	7	39	388	243	35	77	152	138	132	228	0	0	0	0	0	0	0	0	0	0	0	0	0	0	0	0	0	0	0	0	0	3	2	0	0
6668	34	15	9	15	11	0	0	1	3	0	0	4	0	0	0	0	0	0	0	0	0	0	0	0	0	0	0	0	0	0	0	0	0	0	0	0	0	0	0	0	0	0	73	75	195	31	58	1	1
15746	325	33	14	165	38	0	0	0	0	0	0	2	0	0	1	0	0	0	0	0	0	0	0	0	0	0	0	0	0	0	0	0	0	0	0	0	0	0	0	0	0	0	19	220	12	19	33	4	0
26131	120	68	24	72	37	0	2	3	4	3	0	11	2	1	5	0	0	0	0	0	0	0	0	0	0	0	0	0	0	0	0	0	0	0	0	0	0	0	0	0	0	0	34	88	57	32	45	3	1
15757	97	55	15	66	38	0	3	1	3	0	0	5	2	1	1	0	0	0	0	0	0	0	1	0	0	0	0	0	0	0	0	0	0	0	0	0	0	0	0	0	0	0	43	105	57	33	38	3	1
26127	30	41	20	32	6	0	1	1	2	2	0	8	0	0	2	0	0	0	0	0	0	0	0	0	0	0	0	0	0	0	0	0	0	0	0	0	0	0	0	0	0	0	100	56	210	29	26	0	0
26130	19	3	3	8	2	0	3	0	1	0	0	0	0	0	0	0	0	0	0	0	0	0	0	0	0	0	0	0	0	0	0	0	0	0	0	0	0	0	0	0	0	0	161	95	180	32	50	0	0
23111	11	7	13	8	8	0	0	0	0	0	0	0	0	0	0	0	0	0	0	0	0	0	0	0	0	0	0	0	0	0	0	0	0	0	0	0	0	0	0	0	0	0	69	9	1	8	4	0	0
26128	117	23	21	23	17	0	0	0	1	0	0	8	0	0	0	0	0	0	0	0	0	3	0	0	0	0	0	0	0	0	0	0	0	0	0	0	0	0	0	0	0	0	10	188	36	7	48	1	0
1402	3	0	3	1	0	0	0	35	0	58	0	0	0	0	50	0	0	0	0	0	0	0	0	0	0	0	0	0	0	0	0	0	0	0	0	0	0	0	0	0	0	0	0	1	5	14	2	0	5
19090	301	10	9	55	2	0	0	0	0	0	0	13	0	0	0	0	0	0	0	0	0	0	0	1	0	0	0	0	0	0	0	0	0	0	0	0	0	0	0	0	0	0	7	3	2	261	13	1	0
19413	3	0	0	0	0	0	3	0	0	0	0	1	1	1	2	76	387	391	36	118	335	270	550	579	0	0	0	0	0	0	0	0	0	0	0	0	0	0	0	0	0	0	0	0	0	0	0	0	0
11804	26	4	3	13	2	0	0	9	6	4	1	9	1	3	13	5	63	37	11	40	124	15	40	511	0	0	0	0	0	0	0	0	0	0	0	0	0	0	0	0	0	0	1	0	5	4	4	0	0
19414	3	6	0	0	0	0	0	0	0	0	0	3	8	0	1	9	88	158	10	34	115	128	169	276	0	0	0	0	0	0	0	0	0	0	0	0	0	0	0	0	0	0	0	0	0	0	0	0	1
19095	0	0	0	1	1	0	0	2	0	0	1	0	2	0	3	0	6	20	3	0	3	1793	225	4	40	368	0	288	0	0	38	0	0	0	0	1	0	0	3	2462	1	0	0	0	9	2	0	0	1
25859	73	34	6	30	7	1	12	20	10	27	7	21	9	16	34	557	1834	1863	108	1313	1574	1197	1622	3424	0	0	0	0	0	0	0	0	0	0	0	0	0	0	0	0	0	0	0	1	2	1	4	0	0
16184	9	1	1	7	2	1	4	3	4	0	0	2	1	5	6	55	347	340	79	206	233	156	249	575	0	0	0	0	0	0	0	0	0	0	0	0	0	0	0	0	0	0	1	0	0	3	0	0	0
21760	8	4	2	4	2	0	0	3	12	5	6	3	8	2	4	77	235	329	21	212	197	236	248	551	0	0	0	0	0	0	0	0	0	0	0	0	0	0	0	0	0	0	0	0	0	1	0	0	0
16183	12	3	7	10	1	1	0	11	2	9	14	5	12	3	20	60	315	194	47	177	176	160	193	530	0	0	0	0	0	0	0	0	0	0	0	0	0	0	0	0	0	0	0	1	3	2	3	1	0
13411	11	4	0	1	3	0	30	1	0	0	0	2	5	2	5	30	125	83	27	72	122	78	61	333	0	0	0	0	0	0	0	0	0	0	0	0	0	0	0	0	0	0	0	0	0	0	0	0	0
11818	2	5	1	2	0	0	0	0	0	2	0	0	0	1	0	13	86	66	8	64	75	60	64	166	0	0	0	0	0	0	0	0	0	0	0	0	0	0	0	0	0	0	0	0	2	0	0	1	0
22236	9	1	2	0	0	0	0	2	0	0	0	1	3	2	7	14	75	54	16	50	70	37	36	141	0	0	0	0	0	0	0	0	0	0	0	0	0	0	0	0	0	0	0	0	0	0	0	0	0
25860	0	1	0	0	0	0	0	0	0	3	2	1	0	0	3	12	38	39	2	37	45	26	51	89	0	0	0	0	0	0	0	0	0	0	0	0	0	0	0	0	0	0	0	0	1	0	0	0	0
21759	1	1	2	0	0	0	0	0	0	0	0	0	0	0	0	8	54	40	1	30	33	18	34	68	0	0	0	0	0	0	0	0	0	0	0	0	0	0	0	0	0	0	0	0	0	0	0	0	0
19097	31	0	2	2	0	0	1	8	0	0	1	20	3	2	1	0	0	2	0	3	0	2	1	19	0	0	2	16	0	0	0	0	0	0	0	2	29	2185	0	0	0	0	1	1	2	1	0	1	0
19092	2	0	0	0	0	0	0	0	1	0	1	1	1	0	0	1	5	3	1	9	2	11	2	3	0	0	1	12	0	0	0	0	0	0	0	0	5	201	0	0	5	0	0	0	2	0	0	0	0
15528	24	6	0	5	1	0	1	0	0	0	0	9	4	1	12	217	694	1155	194	436	1530	1209	2497	1593	0	0	0	0	0	0	0	0	0	0	0	0	0	0	0	0	0	0	0	1	0	0	0	0	0
4617	65	15	3	13	8	0	1	5	7	7	12	33	10	9	42	74	494	522	47	72	919	356	357	2834	0	0	0	0	0	0	0	0	0	0	0	0	0	0	0	0	0	0	1	1	7	0	0	0	0
15530	7	4	0	0	0	0	0	0	0	0	0	3	2	0	1	31	118	241	29	77	275	229	425	440	0	0	0	0	0	0	0	0	0	0	0	0	0	0	0	0	0	0	0	0	0	0	0	0	0
6678	11	27	189	6	24	0	0	2	9	1	0	0	0	1	1	0	0	2	0	0	0	2	0	1	0	0	0	0	0	0	0	0	0	0	0	0	0	0	0	0	0	0	4	24	77	0	72	3	2
23247	1	303	1	1	41	1	0	0	14	2	0	2	0	0	5	0	7	5	1	3	6	4	7	28	0	0	4	0	0	0	0	0	0	0	0	0	19	0	1	0	0	7	4	11	15	24	7	0	0
15886	0	0	0	0	0	2	0	1	1	0	0	0	0	0	0	0	0	0	0	0	1	0	0	0	0	0	0	0	0	0	0	0	451	0	0	0	0	0	810	0	0	0	1	5	16	0	2	0	0
23248	0	9	0	2	2	0	0	0	2	0	0	0	0	0	0	0	1	1	0	0	0	0	0	0	0	0	0	0	0	0	0	0	0	0	0	0	0	0	0	0	0	0	0	0	0	0	0	0	0
15892	4	136	9	10	6	7	0	1	5	4	0	0	0	1	0	0	2	1	1	0	0	0	4	4	0	0	0	0	0	0	0	0	0	0	0	0	0	0	0	0	0	0	8	3	3	10	1	0	0
16452	0	0	0	1	0	26	0	0	31	0	0	0	0	1	0	0	0	2	0	0	0	0	0	0	0	0	0	0	0	0	14	0	91	0	79	1	0	0	56	0	0	0	3	32	19	0	10	1	2
15881	0	0	41	0	6	0	0	3	13	0	0	0	0	1	0	0	0	0	0	0	0	3	0	0	0	0	0	0	0	0	0	0	0	0	0	0	0	0	0	0	0	0	3	0	14	1	0	0	0
13724	0	0	50	2	0	0	0	7	20	1	0	1	0	0	2	2	1	0	1	7	0	1	1	2	0	0	0	0	0	0	0	0	0	0	0	0	0	0	0	0	0	0	0	0	0	0	2	1	1
16459	251	110	11	24	14	0	0	0	0	0	0	0	0	0	0	0	0	0	0	0	0	0	0	0	0	0	0	0	0	0	0	0	0	0	0	0	0	0	0	0	0	0	6	143	63	0	101	0	0
13725	0	0	1	0	0	0	0	0	0	0	0	0	0	0	1	0	0	0	1	0	0	0	0	0	0	0	0	0	0	0	0	0	0	0	0	0	0	0	0	0	0	0	0	0	0	0	0	0	0
13723	1	0	0	0	0	0	0	0	0	1	0	0	0	0	0	0	0	0	0	0	0	0	0	0	0	0	0	0	0	0	0	0	0	0	0	0	0	0	0	0	0	0	0	0	0	0	0	0	0
9203	7	2	3	11	1	0	2	4	0	3	0	5	0	1	0	0	8	0	1	11	1	68	5	270	0	0	2	5	0	0	0	0	0	0	0	0	1	8	0	0	5	919	0	2	1	5	6	0	1
19094	0	0	0	0	0	0	0	0	5	0	0	0	0	0	0	0	0	0	0	0	3	39	2	1	0	4	0	0	693	78	860	0	506	1	534	0	0	1	276	710	46	0	1	0	2	0	4	0	0
16456	0	0	0	3	0	0	0	0	0	0	0	0	0	0	0	0	0	0	0	2	3	5	2	1	0	0	0	0	0	0	0	0	0	0	0	0	0	0	0	0	0	0	0	0	0	0	0	0	0
16182	0	0	2	0	0	1	0	0	0	0	0	0	0	0	0	0	3	1	0	95	4	11	3	3	0	0	0	0	0	0	0	0	0	0	0	0	0	0	0	0	28	0	0	0	0	0	0	0	0
17064	2253	1299	470	972	305	4	6	27	287	65	1	195	13	87	239	1	0	1	0	0	4	0	1	1	0	0	0	0	0	1	0	0	0	0	0	0	0	0	0	0	0	0	1515	1678	3427	1487	4558	73	9
39	11	2	5	4	0	0	0	0	1	0	0	2	1	1	0	0	0	0	0	0	0	0	0	0	0	0	0	0	0	0	0	0	0	0	0	0	0	0	0	0	0	0	34	1	2	3	6	0	0
22092	691	226	2289	248	228	138	82	1703	1464	1087	3639	2027	1435	30	436	0	3	1	1	3	2	1	4	0	0	0	0	0	0	0	0	0	0	0	0	0	1	0	0	0	0	0	44	75	200	667	152	98	7
22057	37	6	11568	126	25	1	7	8	14	10	0	89	76	2	1	5	15	26	5	19	16	13	31	14	0	0	0	1	0	0	0	0	0	0	0	0	0	0	0	0	0	0	0	6	23	54	514	11	0
22025	79	276	100	71	27	468	3	840	16	44	351	55	34	0	6	3	7	3	1	11	3	3	6	7	0	0	0	0	0	0	0	0	0	0	0	0	0	0	0	0	0	0	231	62	34	28	158	4	22
21950	1021	359	282	1411	10	0	15	78	85	78	1	15512	453	22	104	0	2	1	0	0	0	0	2	0	0	0	0	0	0	0	0	0	0	0	0	0	0	0	0	0	0	0	92	76	25	5000	3	0	0
21850	86	319	235	451	5821	2	0	10	0	5	0	1	9	0	1	0	2	0	1	1	1	1	2	1	0	0	0	0	0	0	0	0	0	0	0	0	0	0	0	0	0	0	74	59	168	0	285	10	1
21876	333	1391	524	330	3757	2	0	2	50	10	0	432	21	7	31	0	0	1	0	0	1	1	3	0	0	0	0	0	0	0	0	0	0	0	0	0	0	0	0	0	0	0	453	76	106	60	180	13	0
2747	41	154	29	60	199	1	0	1	16	1	66	46	22	3	5	0	1	3	1	2	0	0	1	0	0	0	0	0	0	0	0	0	0	0	1	0	0	0	0	0	0	0	41	23	7	22	193	6	0
22026	133	329	87	311	299	7	6	371	16	4	16	107	47	9	21	0	1	1	1	0	0	2	11	0	0	0	0	0	0	1	0	0	0	0	0	0	0	0	0	0	0	0	8	14	15	3	125	29	0
12927	19	377	74	107	98	0	0	0	51	0	0	13	20	4	5	0	0	0	0	0	0	0	3	0	0	0	0	0	0	0	0	0	0	0	0	0	0	0	0	0	0	0	38	21	303	52	931	2	0
2303	214	203	207	562	11	1	2	4	22	20	0	771	19	3	19	0	1	0	0	1	0	1	1	0	0	0	0	0	0	0	0	0	0	0	0	0	0	0	0	0	0	0	249	93	91	20	7	0	0
12524	125	152	373	109	429	2	0	1	7	2	0	27	14	1	7	0	1	0	0	2	2	6	2	1	0	0	3	0	0	0	0	0	0	0	0	0	52	0	0	0	31	0	22	30	177	39	183	44	0
2761	9	0	1	20	1	0	0	2	0	0	0	16	0	0	4	0	0	1	0	3	0	0	0	0	0	0	0	0	0	0	0	0	0	0	0	0	0	0	0	0	0	0	77	44	294	0	20	0	0
13022	5	3	11	2	1	0	0	1	6	3	4	3	6	0	0	0	0	0	0	0	0	0	0	0	0	0	0	0	0	0	0	0	0	0	0	0	0	0	0	0	0	0	2	0	1	1	3	0	0
2717	74	346	16	18	12	0	2	73	162	1	0	145	26	1	14	0	0	1	0	1	0	0	1	0	0	0	0	0	0	0	0	0	0	0	0	0	0	0	0	1	0	0	9	9	6	56	0	1	4
2735	6	16	4	1	0	0	0	7	29	0	0	3	0	2	0	0	0	0	0	0	0	0	0	0	0	0	0	0	0	0	0	0	0	0	0	0	0	0	0	0	0	0	0	0	0	7	0	1389	3
13021	12	6	49	0	2	2	1	14	14	25	66	29	22	0	6	0	1	0	0	0	0	0	0	0	0	0	0	0	0	0	0	0	0	0	0	0	0	0	0	0	0	0	0	0	4	9	8	1	0
12928	16	132	49	107	86	0	0	4	39	1	0	21	239	0	1	1	0	0	0	0	0	1	1	0	0	0	2	0	0	0	0	0	0	0	0	0	0	0	0	0	0	0	9	8	24	24	15	0	0
13026	14	7	55	2	5	0	1	51	45	25	89	59	38	2	10	0	0	0	0	0	0	0	1	0	0	0	0	0	0	0	0	0	0	0	0	0	0	0	0	0	0	0	1	5	4	21	9	0	0
12934	71	34	188	29	156	0	2	4	6	0	14	4	39	0	0	0	0	0	1	0	0	0	0	0	0	0	0	0	0	0	0	0	0	0	0	0	0	0	0	0	0	0	3	7	29	21	195	18	0
2748	13	5	8	28	2	0	0	36	3	251	0	0	0	0	0	0	0	0	0	0	0	0	0	0	0	0	0	0	0	0	0	0	0	0	0	0	0	0	0	0	0	0	0	4	0	4	0	0	35
13023	18	6	49	5	4	2	2	32	30	38	74	59	37	2	9	0	0	0	0	0	0	0	0	0	0	0	0	0	0	0	0	0	0	0	0	0	0	0	0	0	0	0	1	3	9	14	3	2	0
2729	213	95	63	161	11	0	0	0	0	0	0	7	1	0	0	0	0	0	0	0	0	1	0	0	0	0	0	0	0	0	0	0	0	0	0	0	0	0	0	0	0	0	1	0	151	20	1	0	0
22059	1	0	303	2	0	0	0	0	0	0	0	2	1	0	0	0	0	0	0	0	0	1	0	0	0	0	0	0	0	0	0	0	0	0	0	0	0	0	0	0	0	0	0	0	0	1	9	1	0
22027	3	6	1	3	3	15	0	31	0	0	4	1	1	0	0	0	0	0	0	0	0	0	0	0	0	0	0	0	0	0	0	0	0	0	0	0	0	0	0	0	0	0	3	1	0	0	1	0	0
22058	1	0	233	3	1	0	0	0	2	1	0	2	3	0	0	1	0	1	0	0	0	0	0	0	0	0	0	0	0	0	0	0	0	0	0	0	0	0	0	0	0	0	0	0	1	2	12	0	0
22030	3	8	2	1	2	15	0	17	1	0	10	0	0	0	0	1	0	0	0	0	0	0	0	0	0	0	0	0	0	0	0	0	0	0	0	0	0	0	0	0	0	0	8	3	1	0	3	0	1
21951	23	11	10	42	1	0	1	2	4	3	0	445	14	0	4	0	0	0	0	0	0	0	0	0	0	0	0	0	0	0	0	0	0	0	0	0	0	0	0	0	0	0	6	1	1	134	1	0	0
22095	2	4	67	2	3	0	0	2	4	1	2	2	0	0	0	0	0	0	0	0	0	0	0	0	0	0	0	0	0	0	0	0	0	0	0	0	0	0	0	0	0	0	2	2	15	0	357	4	0
21952	22	5	6	28	0	0	0	0	3	1	0	352	8	1	3	0	0	0	0	0	0	0	0	0	0	0	0	0	0	0	0	0	0	0	0	0	0	0	0	0	0	0	2	1	0	114	0	0	0
21852	3	6	6	12	125	0	0	0	0	0	0	0	0	0	1	0	0	0	0	0	0	0	0	0	0	0	0	0	0	0	0	0	0	0	0	0	0	0	0	0	0	0	1	1	3	0	7	0	0
21878	10	43	7	10	110	0	0	0	4	0	0	6	0	1	0	0	0	0	0	0	0	0	0	0	0	0	0	0	0	0	0	0	0	0	0	0	0	0	0	0	0	0	11	0	4	2	8	0	0
21853	2	7	4	16	128	0	0	0	0	0	0	0	0	0	0	0	0	0	0	0	0	0	0	0	0	0	0	0	0	0	0	0	0	0	0	0	0	0	0	0	0	0	2	0	5	0	8	0	0
572	2	0	0	4	0	0	0	0	0	1	0	0	2	0	0	39	257	204	51	153	66	72	126	122	0	0	0	0	0	0	0	0	0	0	0	0	0	0	0	0	0	0	0	0	0	0	0	0	0
746	0	0	0	0	0	0	0	0	0	0	0	1	0	0	0	25	70	48	7	101	72	52	108	124	0	0	0	0	0	0	0	0	0	0	0	0	0	0	0	0	0	0	0	0	0	0	0	0	0
3958	0	0	0	0	0	0	0	0	0	0	0	0	0	0	0	0	0	0	0	0	0	0	0	0	0	0	0	0	0	0	0	0	0	0	0	0	0	0	0	0	0	0	0	0	0	0	0	0	0
18527	1	1	13266	0	73	0	0	1	0	0	0	0	0	0	1	0	0	0	0	0	0	0	2	0	0	0	0	0	0	0	0	0	0	0	0	0	0	0	0	0	0	0	1	0	0	0	74	0	1
9192	80	683	251	241	289	0	0	0	0	0	0	42	14	1	0	0	0	1	0	1	0	0	0	0	0	0	0	0	0	0	0	0	0	0	0	0	0	0	0	0	0	0	14	15	13	536	395	49	1
24400	430	88	211	199	65	0	0	0	0	0	0	16	11	3	1	0	0	3	1	3	0	4	3	0	0	0	0	0	0	0	0	0	0	0	0	0	0	0	0	0	0	0	41	246	51	3	118	21	0
9200	24	144	38	64	127	0	0	0	0	0	0	16	7	0	0	0	0	0	0	0	1	0	0	0	0	0	0	0	0	0	0	0	0	0	0	0	0	0	0	0	0	0	2	2	5	272	44	2	0
18528	17	20	27	81	81	0	0	1	1	0	0	4	11	1	1	2	2	4	4	4	0	11	7	5	0	1	0	0	0	0	0	0	0	0	0	0	0	0	0	0	0	0	5	15	32	24	90	4	0
24401	0	0	1	0	0	0	0	0	0	0	0	0	0	0	0	0	0	1	0	1	0	1	0	0	0	0	0	0	0	0	0	0	0	0	0	0	0	0	0	0	0	0	0	0	0	0	5	613	0
23510	257	5921	1313	452	400	5	0	16	1007	7	2	454	297	7	58	3	21	3	2	9	5	8	12	7	1	1	0	0	1	2	0	0	0	1	2	0	0	0	1	1	1	1	126	61	56	1389	247	28	3
23488	8	34	8	26	25	0	0	1	238	0	0	277	218	26	15	5	5	4	2	2	5	0	11	10	0	0	0	0	0	0	0	0	0	0	0	0	0	0	0	0	0	0	17	9	30	59	6	0	0
16838	10	12	4	29	21	0	0	3	18	0	0	56	90	5	7	1	2	13	0	2	2	19	12	4	0	0	0	0	0	1	0	0	0	0	0	0	1	0	0	1	0	0	69	42	370	5	78	0	0
23489	3	3	1	10	4	1	1	1	86	0	0	139	133	11	21	5	4	5	0	1	3	0	7	1	0	0	0	0	0	0	0	0	0	0	0	0	0	0	0	0	0	0	8	3	15	16	0	0	0
16831	1	5	5	19	6	0	0	4	31	0	2	121	100	4	10	3	0	9	1	5	0	11	3	7	0	0	1	0	0	0	0	0	0	0	0	0	0	0	0	0	0	0	2	0	26	169	2	0	0
23511	10	183	46	12	13	0	0	0	30	0	0	13	7	0	1	1	2	0	0	0	0	4	0	0	0	0	0	0	0	0	0	0	0	0	0	0	0	0	0	0	0	0	4	0	1	51	15	1	1
23514	12	141	39	12	9	0	0	0	32	1	0	10	5	0	0	0	2	0	0	0	0	0	0	0	0	0	0	0	0	0	0	0	0	0	0	0	0	0	0	0	0	0	5	1	0	36	11	0	0
27089	53	31	17	69	6	3	275	37	93	8	2	81	1102	16	13	22	96	195	4	23	56	14415	464	13079	15007	12334	12888	24084	1006	22997	7917	1655	1	124	8134	9838	4359	5097	1119	6	9166	17265	3	32	17	10	8	2	1
13098	0	2	0	0	0	0	2	1	1	0	0	1	15	0	1	1	1	6	0	0	2	464	4	365	254	744	223	347	7	422	126	16	0	4	158	134	107	71	24	0	255	470	0	2	0	1	0	0	0
13101	1	0	0	1	0	0	3	0	1	0	0	0	2	0	0	0	1	1	0	0	0	104	6	86	212	144	226	342	19	290	120	28	0	3	137	166	57	82	16	0	118	232	0	0	2	0	0	0	0
22137	0	0	0	2	0	0	0	0	0	0	0	0	3	0	0	0	0	1	0	0	1	51	3	40	217	171	152	346	16	326	122	13	0	1	111	139	54	63	23	0	117	217	1	0	0	1	0	0	0
13105	0	0	0	0	0	0	0	0	0	0	0	0	0	0	0	0	0	1	0	0	0	12	0	7	193	168	153	302	12	256	111	26	0	0	105	119	56	65	14	0	112	211	0	0	0	0	0	0	0
22139	0	0	1	0	0	0	0	0	0	0	0	1	2	0	0	0	0	1	0	0	1	44	3	52	151	142	101	275	8	254	106	12	0	1	124	117	46	53	20	0	108	145	0	0	0	1	0	0	0
3944	0	0	0	0	0	0	3	0	1	0	0	0	8	0	0	0	7	4	0	0	0	94	3	77	94	75	73	190	8	139	62	4	0	2	69	60	34	42	5	0	66	98	0	0	0	0	0	0	0
25921	1	4	0	1	0	0	0	0	1	0	0	0	2	1	0	0	1	5	0	2	0	778	5	29	120	594	22	38	7	40	161	5	0	0	13	18	17	11	4	0	30	34	0	0	0	0	0	0	0
25917	0	0	0	1	0	0	0	0	0	0	0	1	1	1	0	0	0	6	0	0	0	941	5	14	24	943	12	17	0	9	35	0	0	1	5	3	1	0	0	0	5	10	0	0	0	0	0	0	0
13104	0	0	0	0	0	0	1	0	0	0	0	0	0	0	0	0	0	0	0	0	0	24	1	23	118	110	88	175	10	167	61	13	1	0	58	78	29	45	10	0	85	152	0	0	0	0	0	0	0
22138	2	1	0	2	0	0	1	0	1	0	0	1	11	0	0	0	0	2	0	0	0	127	7	108	135	77	58	137	4	125	44	5	0	0	59	64	40	24	2	0	52	56	0	1	0	0	0	0	0
13102	0	0	0	0	0	0	0	0	1	0	0	0	2	0	0	0	0	0	0	0	1	22	1	26	84	98	75	161	8	118	45	8	0	0	60	80	31	29	15	0	79	95	0	0	0	0	0	0	0
5627	0	0	0	1	0	1	1	0	0	0	0	0	1	0	0	0	2	3	0	0	0	87	2	58	51	35	39	52	2	78	16	3	0	0	19	30	21	12	6	0	25	46	0	0	0	0	0	0	0
69	0	0	0	0	0	0	0	0	0	0	0	1	3	0	0	1	0	1	0	0	0	58	4	38	38	31	38	52	4	54	30	2	0	0	11	37	10	13	2	0	31	40	0	0	0	0	0	0	0
26742	0	0	0	0	0	0	0	0	0	0	0	0	1	0	0	0	0	0	0	0	0	11	0	10	74	66	65	123	8	112	44	8	0	0	39	42	23	38	2	0	54	86	0	0	0	0	0	0	0
224	0	0	0	0	0	0	0	0	0	0	0	1	1	0	0	0	0	0	0	0	0	35	1	29	33	32	40	67	2	49	19	3	0	0	16	21	4	9	1	0	17	37	0	0	0	0	0	0	0
26968	0	0	0	1	0	0	0	0	0	0	0	0	0	0	0	0	0	0	0	0	2	34	0	15	274	12	17	31	2	23	261	1	0	0	99	3	5	7	135	0	57	14	0	0	0	1	0	0	0
22142	0	0	0	0	0	0	0	0	0	1	0	0	5	0	0	0	2	2	0	0	0	80	2	71	61	37	44	117	3	88	28	3	0	0	34	39	18	24	6	0	29	41	0	0	0	0	0	0	0
13107	0	0	0	0	0	0	2	0	0	0	0	1	3	0	0	0	0	0	0	0	1	28	1	27	58	54	50	103	6	90	33	3	0	0	38	49	15	21	5	0	32	62	0	0	0	0	0	0	0
25920	0	1	1	0	0	0	3	1	1	0	0	1	11	1	0	0	1	9	0	0	2	43	1	100	16	16	25	29	1	26	9	1	0	0	304	8	10	175	5	0	39	22	0	0	0	0	0	0	0
3965	0	1	0	1	0	0	3	0	2	0	0	0	4	0	0	0	2	0	1	0	0	51	1	44	71	46	35	108	1	78	43	6	0	0	36	27	13	15	3	0	31	49	0	0	0	0	0	0	0
26966	0	0	0	0	0	0	3	0	0	0	0	0	6	0	0	0	0	2	0	0	1	91	5	86	64	56	40	90	6	85	29	9	0	0	40	43	26	17	2	0	48	50	0	0	0	0	0	0	0
22135	1	0	0	0	0	0	3	0	2	0	0	0	9	0	0	0	1	2	0	0	0	106	5	83	53	37	36	73	2	73	31	1	0	0	34	35	21	14	3	0	26	35	0	0	0	0	0	0	0
26741	0	0	0	0	0	0	1	0	0	0	0	0	3	0	0	0	0	0	0	0	0	16	1	18	72	45	64	98	3	109	39	5	0	0	35	48	22	16	4	0	37	83	0	0	0	0	0	0	0
25923	5	5	11	37	3	0	0	1	4	0	0	3	6	0	3	0	0	1	0	0	0	1	1	0	2	0	0	0	396	3	0	0	0	0	0	0	0	0	0	0	2	0	0	1	0	2	0	0	0
27094	0	0	0	0	0	0	2	0	1	0	0	1	5	1	0	0	0	3	0	0	0	53	6	47	58	44	37	91	4	86	27	2	0	0	13	44	18	10	1	0	32	56	0	0	0	0	0	0	0
25922	2	0	0	0	0	0	6	0	3	0	0	0	29	1	0	1	1	4	1	0	1	366	8	317	1	1	0	5	0	1	1	1	0	0	1	1	1	0	0	0	2	2	0	1	0	1	0	0	0
26738	0	0	0	0	0	0	0	0	0	1	0	0	1	0	0	0	0	0	0	0	0	10	0	6	61	50	52	85	3	98	41	4	0	1	31	29	16	9	3	0	27	66	0	0	0	0	0	0	0
26747	0	0	0	0	0	0	1	0	1	0	0	1	3	0	0	0	1	1	0	0	0	39	4	43	66	40	38	63	3	70	32	1	0	0	26	29	17	12	4	0	34	48	0	0	0	0	0	0	0
26735	0	0	0	0	0	0	0	0	0	0	0	0	0	0	0	0	0	0	0	0	0	4	1	6	50	57	49	85	5	69	24	3	0	0	19	32	13	21	1	0	24	52	0	0	0	0	0	0	0
13099	0	0	0	0	0	0	1	0	0	0	0	0	4	0	0	0	0	1	0	0	0	47	2	45	54	29	28	66	4	48	19	4	0	1	12	34	13	8	5	0	23	42	0	0	0	0	0	0	0
26969	0	0	0	0	0	0	0	0	0	0	0	1	1	0	0	0	0	0	0	0	0	9	0	13	56	44	43	79	3	70	28	4	0	0	27	30	10	13	3	0	20	45	0	1	0	0	0	0	0
26744	0	0	0	0	0	0	1	0	0	0	0	0	3	0	0	0	0	0	0	0	0	37	1	31	43	30	53	80	2	56	21	2	0	0	20	29	21	8	2	0	19	35	0	0	1	0	0	0	0
13110	0	0	0	0	0	0	0	0	0	0	0	2	4	0	0	0	0	1	0	0	0	52	3	32	34	24	40	52	2	41	21	3	0	0	21	22	9	11	2	0	30	25	0	0	0	0	0	0	0
13114	0	0	0	0	0	0	0	0	0	0	0	0	3	0	0	0	0	1	0	0	0	39	1	30	38	26	37	55	3	62	25	1	0	0	24	17	10	12	5	0	17	30	0	0	0	1	0	0	0
25919	0	0	1	0	0	0	0	0	0	0	0	1	8	0	1	0	0	0	0	0	0	58	0	52	47	35	18	37	1	43	16	3	0	0	24	41	3	8	4	0	15	25	0	1	0	0	0	0	0
25925	0	0	0	0	0	0	0	0	0	0	0	0	1	0	0	0	0	0	0	0	1	6	0	10	41	28	30	55	5	50	20	6	0	0	19	17	11	2	0	0	26	42	0	0	0	0	0	0	0
26973	0	0	0	1	0	0	2	0	0	0	0	0	4	0	0	1	0	1	0	0	0	37	1	35	38	25	28	45	3	59	15	2	0	0	18	24	5	10	2	0	12	38	0	0	0	0	0	0	0
26971	0	0	0	0	0	0	0	0	0	0	0	0	3	0	0	0	0	0	0	0	0	35	0	48	31	30	23	49	4	36	19	1	0	1	17	24	8	6	2	0	18	32	0	0	0	0	0	0	0
26746	0	0	0	0	0	0	0	0	0	0	0	0	4	0	0	0	0	2	0	0	0	33	1	26	41	28	30	42	4	33	16	3	0	0	19	20	9	8	6	0	24	27	0	0	0	0	0	0	0
22140	0	0	0	0	0	0	1	0	0	0	0	0	3	0	0	0	0	1	0	0	0	40	2	16	32	24	30	46	3	43	16	2	0	1	12	21	10	9	3	0	14	32	0	0	0	0	0	0	0
27090	0	0	0	0	0	0	2	0	0	0	0	0	3	1	0	0	2	1	0	0	0	29	0	28	27	20	20	38	3	41	13	0	0	0	16	15	5	11	4	0	27	39	0	1	0	0	0	0	0
26706	147	72	618	116	51	1	126	22	86	1	1	280	350	10	53	8	52	50	23	20	28	66	2622	25	1303	0	580	1	326	4	731	0	875	0	3834	2	4888	0	1641	0	347	0	11	38	40	51	137	4	0
12579	13	3	9	14	0	0	3	5	8	0	0	35	20	1	1	1	0	3	1	3	1	16	120	10	376	0	46	0	0	0	426	0	171	0	86	0	198	0	28	0	161	0	1	2	2	6	5	0	0
12581	6	2	1	7	2	0	0	1	1	0	0	7	6	0	1	0	1	2	0	3	0	0	173	3	11	0	24	0	1	0	8	0	50	0	86	0	108	0	70	0	0	0	1	0	2	0	0	0	0
12580	0	0	4	1	0	0	1	0	0	0	0	1	1	0	0	0	0	0	0	0	0	0	10	0	19	0	10	0	2	0	11	0	18	0	45	0	73	0	32	0	11	0	0	0	0	0	2	0	0
21900	1	0	6	2	0	0	1	1	1	0	0	1	2	0	1	0	0	1	0	0	0	0	19	0	14	0	6	0	2	0	7	0	14	0	49	0	58	0	22	0	12	0	0	1	0	0	2	0	0
21901	2	0	3	0	0	0	0	0	0	0	0	0	2	0	1	0	1	0	0	0	1	0	7	1	12	0	13	0	8	0	13	0	8	0	43	0	50	0	17	0	9	0	0	0	0	0	2	0	0
21907	0	0	0	0	0	0	0	0	0	0	0	0	1	0	0	0	0	0	0	0	0	0	2	0	16	0	3	0	4	0	6	0	8	0	43	0	54	0	23	0	1	0	0	0	0	0	1	0	0
26708	1	0	1	0	0	0	0	0	0	0	0	4	0	0	1	0	1	0	0	0	0	0	5	0	27	0	2	0	0	0	0	0	1	0	25	0	16	0	5	0	19	0	0	0	0	0	1	0	0
12788	8	4	2	6	3	0	0	1	3	0	2	9	26	1	18	0	0	1	1	0	0	0	0	3	0	0	11	0	0	0	0	0	0	0	0	0	0	0	27	0	53	0	0	0	0	2	0	0	0
2713	22	3	3	54	11	0	3	0	12	0	2	47	59	1	7	2	1	6	6	4	2	3	10	3	0	0	0	0	0	0	0	0	0	0	0	0	0	0	1	67	0	0	2	2	24	8	10	2	0
12791	5	93	22	15	78	0	2	0	2	0	0	9	2	2	3	3	5	19	1	2	4	7	6	4	0	0	0	0	0	0	0	0	0	0	0	0	0	0	0	0	0	0	10	9	4	9	2	0	2
2547	33	16	8	25	3	0	28	2	23	1	2	31	68	6	32	2	13	3	7	4	0	0	9	14	0	0	0	0	0	0	0	0	0	0	0	0	0	0	0	0	0	0	0	0	3	4	8	0	0
4141	940	58	1220	188	19	0	0	2	0	0	0	104	1	2	3	0	1	1	0	0	0	0	0	2	0	0	0	0	0	0	0	0	0	0	0	0	0	0	0	0	0	0	0	3	29	8	82	90	1
13257	92	2	15	6	0	0	0	0	0	0	0	0	0	0	0	0	0	0	0	0	0	0	0	0	0	0	0	0	0	0	0	0	0	0	0	0	0	0	0	0	0	0	6	82	14	3	45	19	1
4156	8	0	1	4	0	0	0	1	1	3	0	5	6	1	3	64	198	161	31	77	136	205	58	384	0	0	0	0	0	0	0	0	0	0	0	0	0	0	0	0	0	0	0	0	0	0	0	0	0
21612	0	1	0	1	0	0	0	0	3	0	0	6	9	0	2	0	2	1	0	3	0	5	1	0	0	0	0	0	0	0	0	0	0	0	0	0	0	0	0	0	0	0	0	0	0	0	0	0	0
8658	16	0	18	15	0	0	0	0	0	0	0	5	6	0	3	0	7	0	2	0	0	0	0	0	0	0	0	0	0	0	0	0	0	0	0	0	0	0	0	0	0	0	0	0	0	0	0	0	0
24663	2	0	42	20	2	893	36	21	23	236	781	15	1	8	521	0	5	0	0	3	0	1	0	0	0	0	0	0	0	0	0	0	0	0	0	0	0	0	0	0	0	0	1	40	3	10	8	3378	916
21710	11	5	0	15	3	1	0	3	12	0	0	8	31	0	17	815	2101	3486	1339	4376	1093	1284	2373	914	0	0	0	0	0	0	0	0	0	0	0	0	0	0	0	0	0	0	1	6	27	33	10	0	1
26403	20	2	455	211	36	302	163	30	17	127	457	190	120	88	252	2	2	5	1	2	2	25	7	3	0	0	1	0	0	0	0	0	0	0	0	0	0	0	0	0	0	0	10	19	57	70	124	4408	0
24633	18	41	120	19	32	5	554	994	36	1767	150	8	7	414	1332	1	0	1	0	0	0	0	1	0	0	0	0	0	0	0	0	0	0	0	0	0	0	0	0	0	0	0	2	3	5	23	7	9	11
24756	14	3	2	26	6	0	0	4	12	1	0	78	195	0	18	292	666	2208	376	1373	1956	1520	3644	1186	0	0	0	0	0	0	0	0	0	0	0	0	0	0	0	0	0	0	7	2	5	19	9	0	0
18968	38	10	467	35	66	0	95	1761	15	27	16	86	81	31	5684	0	1	1	0	2	5	0	5	0	0	0	0	0	0	0	0	2	0	0	0	0	0	0	0	0	0	0	25	107	26	47	62	6	23
24788	34	4	13	47	7	0	0	10	57	0	0	71	85	3	16	158	338	734	358	869	247	259	583	184	0	0	0	0	0	0	0	0	0	0	0	0	0	0	0	0	0	0	16	36	134	204	27	3	3
18797	48	30	216	106	166	0	0	0	0	0	0	4	4	0	0	0	0	0	0	0	0	0	0	0	0	0	0	0	0	0	0	0	0	0	0	0	0	0	0	0	0	0	5	2	0	427	13	1	0
19029	88	0	565	328	2	0	0	248	40	83	1	20	19	1	198	0	0	0	0	4	1	0	4	1	0	0	0	0	0	0	0	0	0	0	0	0	0	0	0	0	0	0	31	20	30	32	149	88	1
6677	382	69	83	557	12	0	1	0	1	0	0	12	7	3	2	0	0	0	2	0	0	0	2	0	0	0	0	0	0	0	0	0	0	0	0	0	0	0	0	0	0	0	215	298	86	36	513	1	0
18793	3	2	24	39	5	0	0	16	0	9	0	54	17	4	5	0	0	0	1	0	0	0	0	0	0	0	0	0	0	0	0	0	0	0	0	0	0	0	0	0	0	0	2	9	2	10	4	2599	15
24670	0	0	3	1	0	48	3	3	1	11	46	0	0	0	24	0	0	0	0	1	0	0	0	0	0	0	0	0	0	0	0	0	0	0	0	0	0	0	0	0	0	0	0	5	0	0	1	197	49
11514	0	0	1	2	0	0	0	0	2	0	0	1	1	0	0	26	55	165	55	215	53	44	128	57	0	0	0	0	0	0	0	0	0	0	0	0	0	0	0	0	0	0	0	0	2	0	0	0	0
24636	2	3	6	1	3	0	29	57	2	86	9	1	0	21	91	0	0	0	0	0	0	0	0	0	0	0	0	0	0	0	0	0	0	0	0	0	0	0	0	0	0	0	0	0	0	0	0	1	2
19034	0	0	0	4	0	0	0	0	6	1	0	18	9	0	0	1	4	19	4	129	80	11	34	11	0	0	0	0	0	0	0	0	0	0	0	0	0	0	0	0	0	0	2	1	5	14	2	1	0
24724	0	0	12	8	0	14	6	0	1	2	16	4	5	3	5	0	0	2	0	0	1	0	0	0	0	0	0	0	0	0	0	0	0	0	0	0	0	0	0	0	0	0	1	1	2	0	2	178	0
19037	12	0	37	68	0	0	0	0	2	0	0	3	4	0	1	0	0	0	1	0	0	1	1	0	0	0	0	0	0	0	0	0	0	0	0	0	0	0	0	0	0	0	1	8	0	6	120	1	0
24664	0	0	2	0	1	16	1	0	0	5	24	0	0	0	16	0	0	0	1	0	0	0	0	0	0	0	0	0	0	0	0	0	0	0	0	0	0	0	0	0	0	0	0	1	0	0	0	98	27
24671	0	0	1	0	0	17	0	0	1	5	26	0	0	0	22	0	0	0	0	0	0	0	0	0	0	0	0	0	0	0	0	0	0	0	0	0	0	0	0	0	0	0	0	2	0	0	0	69	21
11517	0	0	0	1	0	0	0	0	0	0	0	0	0	0	0	21	48	109	25	104	37	31	90	24	0	0	0	0	0	0	0	0	0	0	0	0	0	0	0	0	0	0	0	0	0	0	0	0	0
21714	1	0	0	2	0	0	0	0	0	0	0	1	1	0	0	18	56	95	31	102	29	21	70	24	0	0	0	0	0	0	0	0	0	0	0	0	0	0	0	0	0	0	0	0	1	0	0	0	0
21716	0	0	0	1	0	0	0	0	0	0	0	1	0	0	0	12	59	85	27	94	18	39	41	33	0	0	0	0	0	0	0	0	0	0	0	0	0	0	0	0	0	0	0	0	1	0	0	0	0
24635	0	3	6	0	2	0	11	22	2	42	3	0	0	10	45	0	0	0	0	0	0	0	0	0	0	0	0	0	0	0	0	0	0	0	0	0	0	0	0	0	0	0	0	0	1	3	0	0	0
24726	0	0	6	4	1	8	3	1	1	5	6	3	7	4	11	0	0	0	0	0	0	0	0	1	0	0	0	0	0	0	0	0	0	0	0	0	0	0	0	0	0	0	0	0	1	2	2	128	0
26406	1	0	11	3	0	13	5	0	0	5	9	6	1	2	12	0	0	0	0	0	0	0	0	0	0	0	0	0	0	0	0	0	0	0	0	0	0	0	0	0	0	0	0	0	1	1	2	107	0
24761	0	0	0	1	0	0	0	0	1	0	0	2	6	0	0	3	17	61	18	55	51	39	109	34	0	0	0	0	0	0	0	0	0	0	0	0	0	0	0	0	0	0	0	0	0	1	0	0	0
24632	0	1	2	1	0	0	13	32	1	33	6	0	0	7	33	0	0	0	0	0	0	0	0	0	0	0	0	0	0	0	0	0	0	0	0	0	0	0	0	0	0	0	0	0	0	1	0	0	0
27008	132	90	472	1273	30	2744	3032	1739	133	19955	3747	6099	949	129	5839	4	12	10	0	7	7	7	12	3	0	0	0	0	0	0	0	0	0	0	0	0	0	0	0	0	0	0	22	103	62	271	7	17	6781
23270	34	19	9	166	3	8463	165	45	21	7106	34183	57	37	3054	4791	2	8	6	1	21	3	6	9	5	0	0	0	0	0	0	0	0	0	0	0	0	0	0	0	0	2	0	2	72	4	5	7	1	835
22842	18	23	19	188	4	3811	34	6	5	13853	3592	18	4	2	3103	1	3	1	3	4	2	0	4	1	0	0	0	0	0	0	0	0	0	0	0	0	0	0	0	0	0	0	1	9	0	35	1	15	2145
22876	3	9	18	30	0	3345	0	1	6	1882	29	1	0	0	425	1	0	2	0	3	0	1	0	0	0	0	0	0	0	0	0	0	0	0	0	0	0	0	0	0	0	0	4	4	0	2	1	0	644
1925	438	52	637	334	185	0	0	6	0	4	0	378	13	0	3	0	0	1	0	2	0	1	1	0	0	0	0	0	0	0	0	0	0	0	0	0	0	0	0	0	0	0	2	2	9	763	622	45	1
15987	0	0	0	5	0	2289	0	3	0	346	307	0	2	7	110	0	0	1	0	1	0	0	0	0	0	0	0	0	0	0	0	0	0	0	0	0	0	0	0	0	0	0	0	0	0	0	0	0	6
15443	2	1	13	36	3	95	111	10	3	671	129	195	27	5	178	0	4	3	1	0	1	0	1	0	0	0	0	0	0	0	0	0	0	0	0	0	0	0	0	0	0	0	0	5	1	7	2	3	244
15441	2	3	1	12	0	0	0	2	53	0	0	2	3	0	3	12	79	219	65	276	44	61	129	36	0	0	0	0	0	0	0	0	0	0	0	0	0	0	0	0	0	0	1	13	24	29	21	0	1
22904	2	5	11	36	1	67	85	41	5	620	98	156	26	7	167	0	0	0	0	0	0	0	1	0	0	0	0	0	0	0	0	0	0	0	0	0	0	0	0	0	0	0	0	2	1	7	0	1	187
15832	0	58	1	9	18	354	5	2	4	106	30	33	36	4	37	0	0	2	0	1	0	0	0	1	0	0	0	0	0	0	0	0	0	0	0	0	0	0	0	0	0	0	3	4	62	1	0	1	25
15984	3	1	0	4	1	200	6	1	2	150	885	1	1	89	118	0	1	0	0	0	0	0	2	0	0	0	0	0	0	0	0	0	0	0	0	0	0	0	0	0	0	0	0	3	1	0	0	1	21
15833	2	1	1	5	18	0	0	0	0	0	0	2	7	0	1	0	0	0	0	0	0	0	0	0	0	0	0	0	0	0	0	0	0	0	0	0	0	0	0	0	0	0	4	1	28	1	19	2928	0
23269	0	0	0	3	0	210	7	0	0	189	940	0	0	98	119	0	0	0	0	2	0	0	0	0	0	0	0	0	0	0	0	0	0	0	0	0	0	0	0	0	0	0	0	3	0	0	0	0	18
22903	3	3	6	32	0	65	65	39	2	519	88	141	25	5	148	0	1	0	0	0	0	0	0	0	0	0	0	0	0	0	0	0	0	0	0	0	0	0	0	0	0	0	0	1	1	2	0	1	160
15990	0	0	2	4	0	208	3	1	0	164	835	0	0	54	108	0	0	0	0	1	0	0	0	0	0	0	0	0	0	0	0	0	0	0	0	0	0	0	0	0	0	0	0	3	0	0	0	0	22
15440	4	0	12	24	2	49	47	8	0	312	64	99	19	3	99	0	2	0	0	0	0	0	1	1	0	0	0	0	0	0	0	0	0	0	0	0	0	0	0	0	0	0	0	2	3	0	1	0	122
15986	0	1	0	1	0	153	4	0	0	106	572	1	0	52	65	0	0	0	0	0	0	0	0	1	0	0	0	0	0	0	0	0	0	0	0	0	0	0	0	0	0	0	0	3	0	0	0	0	14
18964	2	0	5	9	0	49	21	14	0	175	41	42	9	1	43	0	0	0	0	2	0	0	0	0	0	0	0	0	0	0	0	0	0	0	0	0	0	0	0	0	0	0	0	1	0	1	0	2	57
15455	0	0	0	6	0	138	2	1	0	452	123	3	1	0	90	0	0	0	0	0	1	0	1	2	0	0	0	0	0	0	0	0	0	0	0	0	0	0	0	0	0	0	1	1	1	0	0	0	61
22908	0	0	2	2	0	579	4	2	1	176	95	10	1	0	54	0	0	0	0	0	0	0	1	0	0	0	0	0	0	0	0	0	0	0	0	0	0	0	0	0	0	0	0	0	0	0	0	0	11
22844	0	0	0	0	1	764	0	0	0	125	94	0	0	0	23	0	0	0	0	0	0	0	0	0	0	0	0	0	0	0	0	0	0	0	0	0	0	0	0	0	0	0	0	0	0	1	0	0	2
22846	0	0	0	3	1	119	1	0	0	408	102	0	1	0	74	0	0	0	0	1	0	0	0	0	0	0	0	0	0	0	0	0	0	0	0	0	0	0	0	0	0	0	0	0	0	2	0	0	59
22841	0	0	0	12	0	88	1	0	0	364	102	0	0	0	63	0	0	0	0	0	0	0	0	0	0	0	0	0	0	0	0	0	0	0	0	0	0	0	0	0	0	0	0	0	0	1	0	1	39
15438	0	0	11	3	1	148	1	0	1	18	0	6	1	0	4	0	1	0	0	0	0	0	0	0	0	0	0	0	0	0	0	0	0	0	0	0	0	0	0	0	0	0	0	0	0	1	5	518	6
24794	1	0	0	1	0	54	1	0	1	43	222	0	0	25	18	0	0	0	0	0	0	0	0	1	0	0	0	0	0	0	0	0	0	0	0	0	0	0	0	0	0	0	0	1	0	0	0	1	3
26073	2	2	2	10	0	14	13	2	0	152	22	46	3	0	36	0	0	0	0	0	0	0	0	0	0	0	0	0	0	0	0	0	0	0	0	0	0	0	0	0	0	0	0	1	0	2	0	1	52
6671	0	0	1	0	0	185	0	0	0	50	83	1	0	6	18	0	0	0	0	0	1	0	0	0	0	0	0	0	0	0	0	0	0	0	0	0	0	0	0	0	0	0	0	0	0	0	0	1	2
22879	0	0	0	0	0	656	0	0	0	15	0	0	0	0	3	0	0	0	0	0	0	0	0	0	0	0	0	0	0	0	0	0	0	0	0	0	0	0	0	0	0	0	0	0	0	0	0	0	0
26074	0	1	3	7	0	13	16	5	0	113	18	27	3	0	28	0	0	0	0	0	0	0	0	0	0	0	0	0	0	0	0	0	0	0	0	0	0	0	0	0	0	0	0	0	0	0	0	0	29
26835	1	1	2	7	0	13	14	1	0	88	23	23	5	0	26	0	0	0	0	0	0	0	1	0	0	0	0	0	0	0	0	0	0	0	0	0	0	0	0	0	0	0	0	2	1	0	0	0	25
22901	0	0	2	3	0	10	12	8	0	79	22	29	3	2	28	0	0	0	0	0	0	0	0	0	0	0	0	0	0	0	0	0	0	0	0	0	0	0	0	0	0	0	0	0	0	1	0	0	19
15996	0	0	0	0	0	26	0	1	0	21	184	0	0	12	27	0	0	0	0	0	0	0	1	0	0	0	0	0	0	0	0	0	0	0	0	0	0	0	0	0	0	0	0	1	0	0	0	0	4
22877	0	0	0	2	0	88	0	0	1	64	0	0	0	0	11	0	0	0	0	0	0	0	0	0	0	0	0	0	0	0	0	0	0	0	0	0	0	0	0	0	0	0	0	1	0	0	0	0	22
22906	1	0	0	6	0	8	10	4	0	90	5	11	5	1	10	0	0	0	0	0	0	0	0	0	0	0	0	0	0	0	0	0	0	0	0	0	0	0	0	0	0	0	0	3	0	0	0	0	34
22878	0	0	0	1	0	86	0	0	0	40	1	0	0	0	16	0	0	0	0	0	0	0	0	0	0	0	0	0	0	0	0	0	0	0	0	0	0	0	0	0	0	0	0	0	0	0	0	0	18
27009	1	0	3	4	0	4	9	8	0	71	16	16	6	0	21	0	0	0	0	0	0	0	0	0	0	0	0	0	0	0	0	0	0	0	0	0	0	0	0	0	0	0	0	2	0	1	0	1	21
21200	6	5	34	118	0	1234	152	623	6	4573	1308	18	7	654	1885	0	3	3	2	8	1	0	5	3	0	0	0	0	0	0	0	0	0	0	0	0	0	0	0	0	0	0	4	36	9	3	7	0	454
18921	28	17	42	11	25	0	0	11	7	3	3	56	164	16	164	1	1	1	0	0	0	0	3	0	0	0	0	0	0	0	0	0	0	0	0	0	0	0	0	0	0	0	9	2	53	11	14	13872	0
18875	19	8	13	548	2	12	0	10	28	21	16	8	2	2086	281	0	2	0	0	6	0	3	2	1	0	0	0	0	0	0	0	0	0	0	0	0	0	0	0	2	0	0	0	3	0	6	4	5	2
18926	127	95	63	26	40	0	0	1	11	0	0	6	9	1	1	1	0	0	0	1	0	2	1	0	0	0	0	0	0	0	0	0	0	0	0	0	0	0	0	0	0	0	2	0	86	5	0	3	0
21237	1	290	1	9	198	0	0	0	10	0	0	6	21	3	3	0	0	0	0	1	0	3	0	2	0	0	0	0	0	0	0	0	0	0	0	0	0	0	0	0	0	0	60	2	345	1	2	0	0
10242	180	35	106	507	9	0	0	1	0	0	0	0	0	0	0	0	0	0	1	0	0	0	0	0	0	0	0	0	0	0	0	0	0	0	0	0	0	0	0	0	0	0	3	27	41	18	2	0	0
10399	0	1	0	4	0	22	3	5	0	119	32	1	0	14	49	0	0	0	1	0	0	1	0	0	0	0	0	0	0	0	0	0	0	0	0	0	0	0	0	0	0	0	0	1	1	0	0	0	7
24700	17	0	20	24	0	0	0	0	0	0	0	1	7	2	2	0	0	2	0	0	1	0	0	0	0	0	0	0	0	0	0	0	0	0	0	0	0	0	0	0	0	0	0	1	0	1	0	0	0
21199	0	0	3	2	0	32	4	14	0	121	33	2	2	15	76	0	0	0	0	0	0	0	0	0	0	0	0	0	0	0	0	0	0	0	0	0	0	0	0	0	0	0	1	1	0	0	0	0	17
10401	0	1	1	5	0	33	3	15	1	116	27	0	0	15	44	0	0	0	0	0	0	0	0	0	0	0	0	0	0	0	0	0	0	0	0	0	0	0	0	0	0	0	0	1	0	0	0	0	10
24698	3	0	5	18	5	1	0	0	7	0	0	81	81	0	12	1	6	19	15	13	12	30	13	8	0	0	0	0	0	0	0	0	0	0	0	0	0	0	0	0	0	0	2	0	0	3	7	4	0
21239	0	0	0	2	0	0	0	0	0	0	0	0	0	0	0	0	0	0	1	0	0	0	0	0	0	0	0	0	0	0	0	0	0	0	0	0	0	0	0	0	0	0	0	0	0	0	0	545	0
18876	0	0	2	8	0	0	0	3	2	2	0	218	173	5	8	0	0	1	0	0	3	0	5	2	0	0	0	0	0	0	0	0	0	0	0	0	0	0	0	0	0	0	0	0	0	1	1	0	0
15577	302	77	253	38	17	1	1	28	298	6	0	1437	129	4	2	0	1	0	0	0	0	0	0	0	0	0	0	0	0	0	0	0	0	0	0	0	0	0	0	0	0	0	19	34	3	397	323	14	137
15568	960	415	111	587	37	0	0	0	13	0	0	214	55	2	4	0	0	2	0	0	0	0	0	0	0	0	0	0	0	0	0	0	0	0	0	0	0	0	0	0	0	0	359	376	522	244	212	1	0
22969	533	169	186	136	35	0	0	4	81	1	0	568	283	10	5	0	0	0	1	0	0	0	0	0	0	0	0	0	0	0	0	0	0	0	0	0	0	0	0	0	0	0	265	38	317	185	67	332	0
16050	457	71	52	290	4	0	0	0	0	0	0	4	2	0	0	0	0	0	0	0	0	0	0	0	0	0	0	0	0	0	0	0	0	0	0	0	0	0	0	0	0	0	121	170	102	15	239	0	0
15578	165	23	55	88	2	0	0	0	1	0	0	25	10	4	7	0	0	0	0	1	0	0	0	0	0	0	0	0	0	0	0	0	0	0	0	0	0	0	0	0	0	0	79	112	169	6	64	0	0
22972	209	41	188	165	35	0	0	0	6	0	0	41	15	0	1	0	0	0	0	0	0	0	0	0	0	0	0	0	0	0	0	0	0	0	0	0	0	0	0	0	0	0	35	37	41	44	85	8	0
6662	1	0	0	11	0	0	0	4	0	1	0	22	10	0	0	0	6	15	19	7	4	16	26	5	0	0	0	0	0	0	0	0	0	0	0	0	0	0	0	0	0	0	0	1	6	17	0	1	0
16049	30	8	4	70	1	0	0	0	0	0	0	4	9	0	0	0	0	0	0	0	0	0	0	0	0	0	0	0	0	0	0	0	0	0	0	0	0	0	0	0	0	0	154	57	76	6	39	0	0
22943	168	19	14	86	0	0	0	0	0	0	0	5	24	0	0	0	0	0	0	0	0	0	0	0	0	0	0	0	0	0	0	0	0	0	0	0	0	0	0	0	0	0	77	25	15	9	67	0	0
22941	27	6	2	22	0	0	0	0	2	0	0	20	0	0	1	0	0	1	0	0	0	0	0	0	0	0	0	0	0	0	0	0	0	0	0	0	0	0	0	0	0	0	39	31	75	24	5	0	0
6860	168	6	69	163	0	0	0	0	1	0	0	422	1	1	1	0	0	0	0	0	0	0	1	0	0	0	0	0	0	0	0	0	0	0	0	0	0	0	0	0	0	0	29	9	40	25	8	0	0
6861	0	0	0	0	1	0	0	0	0	0	0	1	0	0	0	0	0	0	0	0	0	0	2	0	0	0	0	0	0	0	0	0	0	0	0	0	0	0	0	0	0	0	0	0	0	0	0	0	0
[truncated: 31 more columns]
