# Supplementary material for: Diverse Bacteria Utilize Alginate Within the Microbiome of the Giant Kelp Macrocystis pyrifera
Source: Front Microbiol. 2018 Aug 20;9:1914. doi: 10.3389/fmicb.2018.01914 (PMC6110156; doi:10.3389/fmicb.2018.01914)
Supplement: Supplementary file 8 [file Data_Sheet_5.CSV]

Sample	Number of sequences in input file BEFORE QC (nucleotide)	min length	avg length	max length	total base pairs (bp)	Number of sequences AFTER QC (nucleotide)	min length	avg length	max length	total base pairs (bp)	Number of translated ORFs BEFORE QC (amino)	min length	avg length	max length	total base pairs (bp)	Number of tranlated ORFs AFTER QC (amino)	min length	avg length	max length	total base pairs (bp)	Reads mapped to 16S rRNA gene
GS-Blade-bottom-52_S60_L001_R1_001_merged_cat_filtered.run.stats.txt	233797	100	150	281	35189292	233797	100	150	281	35189292	215389	19	47	93	10140744	201350	33	48	93	9725937	31
GS-Blade-bottom-54_S12_L001_R1_001_merged_cat_filtered.run.stats.txt	78411	100	150	281	11805978	78411	100	150	281	11805978	71598	19	46	93	3358453	66501	33	48	93	3208500	19
GS-Blade-bottom-55_S36_L001_R1_001_merged_cat_filtered.run.stats.txt	674317	100	150	281	101517499	674317	100	150	281	101517499	616448	18	46	93	28912472	572540	33	48	93	27630137	112
GS-Blade-bottom-59_S24_L001_R1_001_merged_cat_filtered.run.stats.txt	243255	100	150	281	36554304	243255	100	150	281	36554304	225487	18	47	93	10600084	210250	33	48	93	10150188	33
GS-Blade-bottom-60_S48_L001_R1_001_merged_cat_filtered.run.stats.txt	1076485	100	149	281	160947451	1076485	100	149	281	160947451	979142	17	46	93	45616117	908345	33	47	93	43537204	215
GS-Blade-mid-51_S47_L001_R1_001_merged_cat_filtered.run.stats.txt	3480889	100	150	281	522936860	3480889	100	150	281	522936860	3237903	18	46	93	151898604	3011046	33	48	93	145206416	1276
GS-Blade-mid-53_S11_L001_R1_001_merged_cat_filtered.run.stats.txt	1169	100	147	274	171911	1169	100	147	274	171911	1001	19	45	87	45547	929	33	46	87	43359	0
GS-Blade-mid-56_S23_L001_R1_001_merged_cat_filtered.run.stats.txt	99818	100	152	281	15201164	99818	100	152	281	15201164	91642	19	47	93	4338628	85108	33	48	93	4148591	41
GS-Blade-mid-57_S59_L001_R1_001_merged_cat_filtered.run.stats.txt	77198	100	150	281	11634798	77198	100	150	281	11634798	69285	19	46	93	3247982	64458	33	48	93	3105932	29
GS-Blade-mid-58_S35_L001_R1_001_merged_cat_filtered.run.stats.txt	317800	100	152	281	48416701	317800	100	152	281	48416701	294588	19	47	93	14020158	275463	33	48	93	13460101	97
GS-Water-bottom-in-68_S84_L001_R1_001_merged_cat_filtered.run.stats.txt	131931	100	136	281	17964205	131931	100	136	281	17964205	123654	17	42	93	5260376	110175	33	44	93	4859196	127
GS-Water-bottom-in-69_S71_L001_R1_001_merged_cat_filtered.run.stats.txt	206921	100	144	281	29861824	206921	100	144	281	29861824	192717	19	45	93	8701414	176706	33	46	93	8228219	203
GS-Water-bottom-in-71_S95_L001_R1_001_merged_cat_filtered.run.stats.txt	70319	100	138	281	9757825	70319	100	138	281	9757825	65471	19	43	93	2843428	59229	33	44	93	2657383	60
GS-Water-bottom-in-73_S83_L001_R1_001_merged_cat_filtered.run.stats.txt	238946	100	136	281	32564636	238946	100	136	281	32564636	222627	18	42	93	9513827	200207	33	44	93	8843323	197
GS-Water-surface-in-67_S72_L001_R1_001_merged_cat_filtered.run.stats.txt	993342	100	143	281	142459401	993342	100	143	281	142459401	938179	18	44	93	42064662	857416	33	46	93	39670330	785
Total	7924598					7924598					7345131					6799723
