# Supplementary material for: Diverse Bacteria Utilize Alginate Within the Microbiome of the Giant Kelp Macrocystis pyrifera
Source: Front Microbiol. 2018 Aug 20;9:1914. doi: 10.3389/fmicb.2018.01914 (PMC6110156; doi:10.3389/fmicb.2018.01914)
Supplement: Supplementary file 9 [file Data_Sheet_6.CSV]

CAZY_Family	CAZY_Annotation	GS.Blade.mid.58	GS.Blade.mid.51	GS.Blade.bottom.60	GS.Water.bottom.in.68	GS.Water.surface.in.67	GS.Blade.mid.57	GS.Water.bottom.in.69	GS.Blade.bottom.59	GS.Blade.mid.56	GS.Water.bottom.in.71	GS.Blade.mid.53	GS.Blade.bottom.52	GS.Blade.bottom.54	GS.Blade.bottom.55	GS.Water.bottom.in.73
Glycoside Hydrolases		1584	14641	4478	784	7069	378	1562	1210	513	438	8	1050	409	2930	1437
GH1		7	63	52	10	99	3	9	7	8	7	0	5	5	36	16
Archaea		0	0	0	1	3	0	0	0	0	2	0	0	0	0	2
ABW02360.1	Cmaq_1537 [Caldivirga maquilingensis IC-167]	0	0	0	0	1	0	0	0	0	0	0	0	0	0	0
BAD86016.1	beta-glycosidase (TK1827) (3.2.1.-) [Thermococcus kodakarensis KOD1]	0	0	0	1	2	0	0	0	0	0	0	0	0	0	1
EHR78077.1	OCC_04445 [Thermococcus litoralis DSM 5473]	0	0	0	0	0	0	0	0	0	0	0	0	0	0	1
AIF16120.1	ORF [uncultured marine thaumarchaeote KM3_72_F07]	0	0	0	0	0	0	0	0	0	1	0	0	0	0	0
ADY00258.1	VMUT_0041 [Vulcanisaeta moutnovskia 768-28]	0	0	0	0	0	0	0	0	0	1	0	0	0	0	0
Bacteria		7	61	39	8	91	3	8	4	6	5	0	5	3	26	8
AGZ44652.1	AFR_31960 [Actinoplanes friuliensis DSM 7358]	0	0	1	0	0	0	0	0	0	0	0	0	0	0	0
AGZ46379.1	AFR_40625 [Actinoplanes friuliensis DSM 7358]	0	0	1	0	0	0	0	0	0	0	0	0	0	0	0
AGL19093.1	L083_5583 [Actinoplanes sp. N902-109]	0	0	0	0	1	0	0	0	0	0	0	0	0	0	0
AGL21246.1	L083_7736 (BgL) [Actinoplanes sp. N902-109]	1	0	0	0	0	0	0	0	0	0	0	0	0	0	0
ACU35632.1	Amir_1683 [Actinosynnema mirum DSM 43827]	0	0	0	0	0	0	0	0	0	0	0	0	0	0	1
ACM27761.1	Arad_3925 (BglscH) [Agrobacterium radiobacter K84]	0	2	0	0	0	0	0	0	0	0	0	0	0	0	0
AFS48747.1	HIMB59_00005470 [alpha proteobacterium HIMB59]	0	0	0	0	3	0	0	0	0	0	0	0	0	0	0
AGI04197.1	beta-glucosidase [alpha proteobacterium U95]	0	0	0	0	4	0	0	0	0	0	0	0	0	1	0
AFV87273.1	amad1_18990 [Alteromonas macleodii AltDE1]	0	0	0	1	0	0	0	0	0	0	0	0	0	0	0
AFS39105.1	MASE_18075 [Alteromonas macleodii ATCC 27126]	0	0	0	0	2	0	0	0	0	0	0	0	0	0	0
AFT76318.1	AMEC673_18210 [Alteromonas macleodii str. 'English Channel 673']	0	0	0	0	0	0	0	0	1	0	0	0	0	0	0
AEF05903.1	ambt_22090 [Alteromonas sp. SN2]	0	1	0	0	0	0	0	0	0	0	0	0	0	0	0
AIG76409.1	AJAP_17705 (Bgla3) [Amycolatopsis japonica MG417-CF17]	0	0	0	0	1	0	0	0	0	0	0	0	0	0	0
AIG75517.1	AJAP_13180 (BglS) [Amycolatopsis japonica MG417-CF17]	0	0	0	0	1	0	0	0	0	0	0	0	0	0	0
AIG73021.1	AJAP_00415 (Bgla1) [Amycolatopsis japonica MG417-CF17]	0	0	0	0	3	0	0	0	0	0	0	0	0	0	0
AEK40976.1	RAM_12430 [Amycolatopsis mediterranei S699]	0	0	0	0	1	0	0	0	0	0	0	0	0	0	0
AFO78672.1	AMES_5136 (BglB) [Amycolatopsis mediterranei S699]	0	0	0	0	2	0	0	0	0	0	0	0	0	0	0
ADJ41910.1	AMED_0086 (BglB) [Amycolatopsis mediterranei U32]	0	0	0	0	0	0	0	0	0	0	0	0	0	0	1
AGM06825.1	AORI_4240 (BglB) [Amycolatopsis orientalis HCCB10007]	0	0	2	0	0	0	0	0	0	0	0	0	0	0	0
ADX71280.1	Asphe3_00610 [Arthrobacter phenanthrenivorans Sphe3]	0	0	0	0	0	0	0	0	0	0	0	0	0	1	0
ADX72847.1	Asphe3_16900 [Arthrobacter phenanthrenivorans Sphe3]	0	0	0	0	2	0	0	0	0	0	0	0	0	0	0
BAB05642.1	beta-glucosidase (BglA;BH1923) (3.2.1.21) [Bacillus halodurans C-125]	0	1	0	0	0	0	0	0	0	0	0	0	0	0	0
AII75500.1	BADO_0074 [Bifidobacterium adolescentis 22L]	0	0	1	0	0	0	0	0	0	0	0	0	0	0	0
ADG20157.1	BC1002_6300 [Burkholderia sp. CCGE1002]	0	0	1	0	0	0	0	0	0	0	0	0	0	0	0
ADL34422.1	bpr_I1685 [Butyrivibrio proteoclasticus B316]	0	0	0	0	1	0	0	0	0	1	0	0	0	0	0
AEM72933.1	Calla_0253 [Caldicellulosiruptor lactoaceticus 6A]	0	0	0	0	0	0	0	0	0	0	0	1	0	0	0
ABF43014.1	Acid345_4014 [Candidatus Koribacter versatilis Ellin345]	0	0	1	0	0	0	0	0	0	0	0	0	0	0	0
AHB42465.1	RAAC3_TM7C00001G0619 [Candidatus Saccharibacteria bacterium RAAC3_TM7_1]	0	0	0	0	2	0	0	0	0	0	0	0	0	0	0
ACU71435.1	Caci_2517 [Catenulispora acidiphila DSM 44928]	0	1	0	0	0	0	0	0	0	0	0	0	0	0	0
ACU70272.1	Caci_1349 [Catenulispora acidiphila DSM 44928]	0	0	1	0	0	0	0	0	0	0	0	0	0	0	0
AAK24107.1	CC2136 / CC_2136 [Caulobacter crescentus CB15]	0	0	1	0	0	0	0	0	0	0	0	0	0	0	0
ADG73989.1	Cfla_1084 [Cellulomonas flavigena DSM 20109]	0	0	1	0	0	0	0	0	0	0	0	0	0	0	0
ACQ54105.1	CLJ_B1242 [Clostridium botulinum Ba4 str. 657]	0	0	0	0	0	0	0	0	0	0	0	0	0	1	0
ADN17735.1	Cyan7822_5881 [Cyanothece sp. PCC 7822]	0	0	1	0	0	0	0	0	0	0	0	0	0	0	1
AFD27167.1	DGo_PA0281 [Deinococcus gobiensis I-0]	0	0	0	0	0	0	0	0	0	0	0	0	1	0	0
ADV67117.1	Deima_1468 [Deinococcus maricopensis DSM 21211]	0	3	0	0	0	0	0	1	0	0	0	1	0	1	0
ADV67544.1	Deima_1899 [Deinococcus maricopensis DSM 21211]	0	0	1	0	0	0	0	0	0	0	0	0	0	0	0
AFZ66637.1	Deipe_1074 [Deinococcus peraridilitoris DSM 19664]	0	1	0	0	0	0	0	0	0	0	0	0	0	0	0
AFZ67158.1	Deipe_1620 [Deinococcus peraridilitoris DSM 19664]	0	0	0	2	0	0	0	0	0	0	0	0	0	0	0
CDK31020.1	BABL1_731 (BglA) [delta proteobacterium BABL1]	0	0	0	0	1	0	0	0	0	0	0	0	0	0	0
ACI18700.1	DICTH_0359 [Dictyoglomus thermophilum H-6-12 ATCC 35947]	0	0	0	0	2	0	0	0	0	0	0	0	0	0	0
ABV93396.1	Dshi_1654 [Dinoroseobacter shibae DFL 12]	0	0	0	0	1	0	0	0	0	0	0	0	1	0	0
ACT96069.1	Dfer_4868 [Dyadobacter fermentans DSM 18053]	0	0	0	0	1	0	0	0	0	0	0	0	0	0	0
ABS61373.1	Fnod_1530 [Fervidobacterium nodosum Rt17-B1]	0	0	0	0	0	0	0	0	0	0	0	0	0	1	0
AFZ31491.1	Glo7428_3002 [Gloeocapsa sp. PCC 7428]	0	0	0	0	1	0	0	0	0	0	0	0	0	0	0
ACL69240.1	Hore_04820 [Halothermothrix orenii H 168 H 168; DSM 9562]	0	0	0	0	1	0	0	0	0	0	0	0	0	1	0
BAN04424.1	YM304_41100 [Acidimicrobidae bacterium YM16-304]	0	0	3	0	0	0	0	0	0	0	0	0	0	1	0
AEG45006.1	Isova_2287 [Isoptericola variabilis 225]	0	0	0	0	0	0	0	0	0	0	0	0	0	1	0
ABD54861.1	Jann_1944 [Jannaschia sp. CCS1]	0	0	0	0	0	0	1	0	0	0	0	0	0	0	0
AEM41172.1	KVU_1334 (BglA) [Ketogulonigenium vulgarum WSH-001]	0	1	1	0	0	0	0	0	0	0	0	0	0	0	0
ADO42989.1	EIO_1873 [Ketogulonicigenium vulgare Y25]	0	0	0	0	1	0	0	0	0	0	0	0	1	0	0
BAJ30040.1	KSE_42550 [Kitasatospora setae KM-6054 ATCC 33774]	0	1	0	0	0	0	0	0	0	0	0	0	0	0	0
ADB34272.1	Kfla_5258 [Kribbella flavida DSM 17836]	0	1	0	0	0	0	0	0	0	0	0	0	0	0	0
CDK99105.1	MGMSR_1890 [Magnetospirillum gryphiswaldense MSR-1 v2]	0	0	0	0	0	1	0	0	0	0	0	0	0	0	0
BAE51034.1	amb2230 (probable fragment) [Magnetospirillum magneticum AMB-1]	0	1	0	0	0	0	0	0	0	0	0	0	0	1	0
AGC48195.1	MYSTI_06923 [Myxococcus stipitatus DSM 14675]	0	0	0	1	3	0	0	0	0	1	0	0	0	0	0
ABF87202.1	MXAN_6555 [Myxococcus xanthus DK 1622]	0	0	1	0	0	0	0	0	0	0	0	0	0	0	0
CDN55449.1	RG1141_CH31140 [Rhizobium galegae bv. officinalis str. HAMBI 1141]	0	0	1	0	0	0	0	0	0	0	0	0	0	0	0
ADH67953.1	Ndas_2534 [Nocardiopsis dassonvillei subsp. dassonvillei DSM 43111]	0	0	0	0	0	0	0	0	0	0	0	0	0	1	0
ADH66252.1	Ndas_0808 [Nocardiopsis dassonvillei subsp. dassonvillei DSM 43111]	0	0	0	0	0	0	1	0	0	0	0	0	0	0	0
ACC80873.1	Npun_F2285 [Nostoc punctiforme PCC 73102 ATCC 29133]	0	4	0	0	1	0	0	0	0	0	0	0	0	0	0
AFY47546.1	Nos7524_1674 [Nostoc sp. PCC 7524]	1	0	0	0	0	0	0	0	0	0	0	0	0	0	0
AGI67943.1	OAN307_c23210 (BglA) [Octadecabacter antarcticus 307]	0	0	0	0	0	0	0	0	0	0	0	0	0	0	1
AGI71621.1	OA238_c14760 (BglA) [Octadecabacter arcticus 238]	0	0	1	0	2	0	0	0	0	1	0	0	0	0	0
AFY80610.1	Oscil6304_0877 [Oscillatoria acuminata PCC 6304]	0	0	0	0	1	0	0	0	0	0	0	0	0	0	0
AFC27996.1	PM3016_1059 [Paenibacillus mucilaginosus 3016]	0	0	0	0	0	0	0	0	0	0	0	0	0	1	0
AEI42401.1	KNP414_03863 (fragment) [Paenibacillus mucilaginosus KNP414]	0	0	0	0	0	0	0	0	0	1	0	0	0	0	0
AAA22263.1	beta-glucosidase A (BglA) (3.2.1.21) [Paenibacillus polymyxa]	0	0	0	0	0	0	0	0	0	0	0	1	0	0	0
ADM71855.1	PPE_04075 [Paenibacillus polymyxa E681]	0	0	1	0	0	0	0	0	0	0	0	0	0	0	0
ADO58541.1	PPSC2_c4592 [Paenibacillus polymyxa SC2]	0	0	1	0	0	0	0	0	0	0	0	0	0	0	0
AET56831.1	HPL003_00225 [Paenibacillus terrae HPL-003]	0	0	0	0	0	0	0	0	0	0	0	0	0	1	0
AFO86778.1	PGA2_c07620 (BglA) [Phaeobacter gallaeciensis 2.10]	0	1	0	0	6	1	1	0	0	0	0	0	0	1	0
AHD10441.1	Gal_02707 [Phaeobacter gallaeciensis DSM 26640]	0	0	2	1	7	0	2	0	0	0	0	0	0	0	0
AFO90512.1	PGA1_c07840 (BglA) [Phaeobacter gallaeciensis DSM 17395]	0	0	0	0	10	0	0	0	0	0	0	0	0	0	1
AII87177.1	RCA23_c16410 (BglA) [Planktomarina temperata RCA23]	0	0	1	0	1	0	0	0	0	0	0	0	0	0	0
ADT67610.1	PSM_A0660 [Pseudoalteromonas sp. SM9913]	0	0	0	0	1	0	0	0	0	0	0	0	0	0	0
ACI56670.1	Rleg2_3403 [Rhizobium leguminosarum bv. trifolii WSM2304]	0	1	0	0	0	0	0	0	0	0	0	0	0	1	0
CDI10067.1	BN877_II0267 (AbG) [Rhizobium sp. IRBG74]	0	0	0	0	0	0	0	0	0	0	0	0	0	1	0
CDM59295.1	LPU83_3652 (BgL) [Rhizobium sp. LPU83]	0	0	0	0	0	0	0	0	0	0	0	1	0	0	0
CCF20536.1	NT26_2812 (AbG) [Rhizobium sp. NT-26]	0	0	1	0	0	0	0	0	0	0	0	0	0	0	0
ADE85514.1	RCAP_rcc01769 (BglA) [Rhodobacter capsulatus SB1003]	0	0	1	0	1	0	0	0	0	0	0	0	0	0	0
ABP70047.1	Rsph17025_1146 [Rhodobacter sphaeroides ATCC 17025]	0	0	0	0	2	0	0	0	0	0	0	0	0	1	1
ACM01050.1	RSKD131_1190 [Rhodobacter sphaeroides KD131 KD131; KCTC 12085]	0	0	0	0	3	0	0	0	0	0	0	0	0	0	0
CBH48130.1	REQ_20720 [Rhodococcus equi 103S]	0	0	0	0	1	0	0	0	0	0	0	0	0	0	0
BAH34163.1	RER_34550 [Rhodococcus erythropolis PR4 PR4 (= NBRC 100887)]	0	1	0	0	0	0	0	0	0	0	0	0	0	0	0
AEN97393.1	RHOM_11425 [Roseburia hominis A2-183]	0	7	1	0	0	0	0	0	1	0	0	0	0	2	0
CBL12378.1	RO1_18130 [Roseburia intestinalis XB6B4]	4	19	2	0	3	0	1	0	4	0	0	0	0	1	0
ABQ91331.1	RoseRS_2967 [Roseiflexus sp. RS-1]	0	0	0	0	1	0	0	0	0	0	0	0	0	0	0
ABG31897.1	RD1_2318 [Roseobacter denitrificans OCh 114]	0	0	0	0	2	0	0	0	0	0	0	0	0	0	0
AEI94153.1	RLO149_c021770 (BglA) [Roseobacter litoralis Och 149]	0	0	2	2	0	0	0	0	0	0	0	0	0	0	0
ABF62281.1	TM1040_3309 [Silicibacter sp. TM1040]	0	0	0	0	0	0	0	0	0	0	0	0	0	0	2
CBL23046.1	CK5_16390 [Ruminococcus obeum A2-162]	0	0	0	0	1	0	0	0	0	0	0	0	0	0	0
AEI52222.1	Runsl_5737 [Runella slithyformis DSM 19594]	0	2	0	0	0	0	0	0	0	0	0	0	0	0	0
ACZ20966.1	Sked_10170 [Sanguibacter keddieii DSM 10542]	0	1	0	0	0	0	0	0	0	0	0	0	0	0	0
ACZ10042.1	Sterm_3201 [Sebaldella termitidis ATCC 33386]	0	0	0	0	1	0	0	0	0	0	0	0	0	0	0
AGQ32888.1	M495_21300 [Serratia liquefaciens ATCC 27592]	0	0	1	0	0	0	0	0	0	0	0	0	0	0	0
AEG30115.1	SerAS13_4363 [Serratia sp. AS13]	0	0	0	0	0	1	0	0	0	0	0	0	0	0	0
ABL99609.1	Sama_1402 [Shewanella amazonensis SB2B]	0	2	0	0	0	0	0	0	0	0	0	0	0	0	0
AEG12383.1	Sbal175_3144 [Shewanella baltica BA175]	0	0	1	0	0	0	0	0	0	0	0	0	0	0	0
ABS07335.1	Shew185_1183 [Shewanella baltica OS185]	0	0	0	1	0	0	0	0	0	0	0	0	0	0	0
ACK47659.1	Sbal223_3174 [Shewanella baltica OS223]	0	1	0	0	0	0	0	0	0	0	0	0	0	0	0
CAN93214.1	sce3055 [Sorangium cellulosum 'So ce 56']	0	0	0	0	0	0	0	0	0	0	0	0	0	1	0
CAN94460.1	sce4297 (Bgla2) [Sorangium cellulosum 'So ce 56']	0	0	0	0	2	0	0	0	0	0	0	0	0	0	0
CAN97832.1	sce7663 [Sorangium cellulosum 'So ce 56']	0	0	0	0	0	0	0	1	0	0	0	0	0	0	0
AGP39887.1	SCE1572_38575 [Sorangium cellulosum So0157-2]	0	1	1	0	0	0	0	0	0	0	0	1	0	0	0
AHC16437.1	L21SP2_3095 [Spirochaeta sp. L21-RPul-D2]	0	0	0	0	2	0	0	0	0	0	0	0	0	0	0
ADN03034.1	STHERM_c21030 [Spirochaeta thermophila DSM 6192]	0	0	0	0	1	0	0	0	0	0	0	0	0	0	0
AGS72850.1	B446_30230 [Streptomyces collinus Tu 365]	0	0	0	0	0	0	0	0	0	0	0	0	0	1	0
AGK80287.1	SFUL_5394 [Streptomyces fulvissimus DSM 40593]	0	0	1	0	0	0	0	0	0	0	0	0	0	0	0
AEY93261.1	SHJG_7995 [Streptomyces hygroscopicus subsp. jinggangensis 5008]	0	0	0	0	0	0	0	1	0	0	0	0	0	0	0
AGF67419.1	SHJGH_7757 [Streptomyces hygroscopicus subsp. jinggangensis TL01]	0	0	0	0	0	0	0	1	0	0	0	0	0	0	0
ADW02626.1	Sfla_1175 [Streptomyces flavogriseus ATCC 33331]	0	0	0	0	0	0	0	0	0	0	0	0	0	2	0
AEJ40109.1	TPY_1929 [Sulfobacillus acidophilus TPY]	0	0	0	0	1	0	0	0	0	0	0	0	0	0	0
AAF37730.1	(3.2.1.21) [Thermobifida fusca ER1]	0	0	1	0	0	0	0	0	0	0	0	0	0	0	0
ADG87563.1	Tbis_0839 [Thermobispora bispora DSM 43833]	0	0	1	0	0	0	0	0	0	0	0	0	0	0	0
ACZ00292.1	Tcur_4773 [Thermomonospora curvata DSM 43183]	0	0	0	0	0	0	0	0	0	0	0	0	0	1	0
ADA66698.1	Tnap_0602 [Thermotoga naphthophila RKU-10]	0	1	0	0	0	0	0	0	0	0	0	0	0	0	0
ACM22958.1	(3.2.1.21) [Thermotoga neapolitana DSM 4359]	0	1	0	0	0	0	0	0	0	0	0	0	0	0	0
AFM10864.1	Turpa_0202 [Turneriella parva DSM 21527]	0	0	0	0	4	0	1	0	0	0	0	0	0	0	0
AEM44251.1	beta-galactosidase (Orf6) [uncultured bacterium]	0	1	0	0	0	0	0	0	0	0	0	0	0	0	0
AHI85742.1	beta-glucosidase (AmBGL18) (3.2.1.21) [uncultured bacterium]	0	0	0	0	0	0	0	0	0	0	0	0	0	1	0
AIF34055.1	ORF (AS-Esc9) [uncultured bacterium]	0	0	0	0	0	0	1	0	0	0	0	0	0	0	0
AHF25575.1	ORF [uncultured bacterium Contigcl_22]	0	0	0	0	0	0	0	0	0	1	0	0	0	0	0
AEB46173.1	VAB18032_25375 [Verrucosispora maris AB-18-032]	0	0	1	0	0	0	0	0	0	0	0	0	0	0	0
ABU74812.1	VIBHAR_06938 [Vibrio harveyi ATCC BAA-1116 BB120]	0	1	0	0	0	0	0	0	0	0	0	0	0	0	0
CCO61465.1	VIBNI_B1736 (BglB) [Vibrio nigripulchritudo SFn1]	0	0	0	0	2	0	0	0	0	0	0	0	0	0	0
CAV27501.1	VS_II1388 [Vibrio splendidus LGP32]	0	0	0	0	0	0	0	0	0	0	0	0	0	1	0
BAC96154.1	VVA0128 [Vibrio vulnificus YJ016]	0	0	1	0	0	0	0	0	0	0	0	0	0	0	0
Eukaryota		0	2	13	1	5	0	1	3	2	0	0	0	2	8	6
AAC16091.1	At2g44450 (Bglu15) [Arabidopsis thaliana]	0	0	0	0	0	0	0	0	0	0	0	0	0	1	0
AAL36402.1	At3g21370 (Bglu19) [Arabidopsis thaliana]	0	0	0	0	1	0	0	0	0	0	0	0	0	0	0
NP_188435.2	At3g18070 (Bglu43) [Arabidopsis thaliana]	0	0	0	0	0	0	1	0	0	0	0	0	0	0	0
NP_198505.2	At5g36890 (Bglu42) [Arabidopsis thaliana]	0	0	1	0	0	0	0	0	0	0	0	0	0	0	0
EAA63677.1	AN3106.2 [Aspergillus nidulans FGSC A4]	0	1	7	0	2	0	0	1	0	0	0	0	0	3	1
CBD31924.1	unnamed protein product [Brassica napus]	0	0	0	1	0	0	0	0	0	0	0	0	0	0	0
BAO04174.1	DgBglu3 [Delphinium grandiflorum]	0	0	1	0	0	0	0	0	0	0	0	0	0	0	0
AAP51059.1	cyanogenic beta-glucosidase [Hevea brasiliensis]	0	0	0	0	0	0	0	0	0	0	0	0	0	0	1
BAJ53147.1	JHL23J11.2 [Jatropha curcas Palawan]	0	1	0	0	0	0	0	0	0	0	0	0	0	0	0
AHB37683.1	Bglu [Olea europaea]	0	0	0	0	0	0	0	0	0	0	0	0	0	1	0
ACF35791.1	beta-mannosidase (Os7BGlu26) [Oryza sativa Indica Group]	0	0	0	0	0	0	0	1	0	0	0	0	0	0	0
CAL55832.1	Ot11g02270 [Ostreococcus tauri OTTH0595]	0	0	0	0	0	0	0	0	0	0	0	0	0	0	1
BAE87008.1	(3.2.1.21) [Phanerochaete chrysosporium K-3]	0	0	1	0	0	0	0	0	0	0	0	0	0	0	0
AHZ59654.1	GH1-8 [Phyllotreta striolata]	0	0	1	0	0	0	0	0	0	0	0	0	0	0	0
AER62653.1	ORF (fragment) [Psathyrostachys juncea]	0	0	0	0	0	0	0	0	0	0	0	0	0	1	0
AAL40863.1	male-specific beta-glycosidase (Lmalpha-p72) (3.2.1.-) [Rhyparobia maderae]	0	0	0	0	0	0	0	0	0	0	0	0	1	0	0
AFU91383.1	beta-glucosidase (Bgl1) [Talaromyces funiculosus NCL1]	0	0	0	0	0	0	0	0	1	0	0	0	0	0	0
ACZ34300.1	beta-glucosidase II [Trichoderma longibrachiatum FU05]	0	0	0	0	0	0	0	0	0	0	0	0	0	0	1
ADP02193.1	4N5.5 [Triticum aestivum]	0	0	0	0	1	0	0	0	0	0	0	0	0	0	0
AHB37683.1	Bglu [Olea europaea]	0	0	0	0	0	0	0	0	0	0	0	0	0	1	0
ACF35791.1	beta-mannosidase (Os7BGlu26) [Oryza sativa Indica Group]	0	0	0	0	0	0	0	1	0	0	0	0	0	0	0
CAL55832.1	Ot11g02270 [Ostreococcus tauri OTTH0595]	0	0	0	0	0	0	0	0	0	0	0	0	0	0	1
BAE87008.1	(3.2.1.21) [Phanerochaete chrysosporium K-3]	0	0	1	0	0	0	0	0	0	0	0	0	0	0	0
AHZ59654.1	GH1-8 [Phyllotreta striolata]	0	0	1	0	0	0	0	0	0	0	0	0	0	0	0
AER62653.1	ORF (fragment) [Psathyrostachys juncea]	0	0	0	0	0	0	0	0	0	0	0	0	0	1	0
AAL40863.1	male-specific beta-glycosidase (Lmalpha-p72) (3.2.1.-) [Rhyparobia maderae]	0	0	0	0	0	0	0	0	0	0	0	0	1	0	0
AFU91383.1	beta-glucosidase (Bgl1) [Talaromyces funiculosus NCL1]	0	0	0	0	0	0	0	0	1	0	0	0	0	0	0
ACZ34300.1	beta-glucosidase II [Trichoderma longibrachiatum FU05]	0	0	0	0	0	0	0	0	0	0	0	0	0	0	1
ADP02193.1	4N5.5 [Triticum aestivum]	0	0	0	0	1	0	0	0	0	0	0	0	0	0	0
unclassified		0	0	0	0	0	0	0	0	0	0	0	0	0	2	0
AGU09994.1	ORF [uncultured organism]	0	0	0	0	0	0	0	0	0	0	0	0	0	1	0
GH2		42	165	150	32	209	14	48	47	10	4	0	42	15	103	39
Archaea		3	0	3	0	2	0	0	1	0	0	0	0	0	0	0
ACV49329.1	Hmuk_3226 [Halomicrobium mukohataei DSM 12286]	0	0	1	0	0	0	0	0	0	0	0	0	0	0	0
AEH39070.1	Halxa_0469 [Halopiger xanaduensis SH-6]	0	0	2	0	1	0	0	0	0	0	0	0	0	0	0
CCQ34004.1	HTIA_1885 [Halorhabdus tiamatea SARL4B type strain: SARL4B]	0	0	0	0	1	0	0	0	0	0	0	0	0	0	0
AHG01958.1	HALLA_01275 [Halostagnicola larsenii XH-48]	1	0	0	0	0	0	0	0	0	0	0	0	0	0	0
AFZ71909.1	Natgr_0662 [Natronobacterium gregoryi SP2]	0	0	0	0	0	0	0	1	0	0	0	0	0	0	0
AGN01147.1	L593_05990 [Salinarchaeum sp. Harcht-Bsk1]	1	0	0	0	0	0	0	0	0	0	0	0	0	0	0
Bacteria		28	150	123	28	175	13	44	39	9	2	0	34	12	86	31
ABW27814.1	AM1_2814 [Acaryochloris marina MBIC11017]	0	0	0	0	0	0	0	2	0	0	0	0	3	0	0
ACO34294.1	ACP_0072 [Acidobacterium capsulatum ATCC 51196]	0	0	0	0	1	0	0	0	0	0	0	0	0	1	0
ADW68978.1	AciX9_1932 [Acidobacterium sp. MP5ACTX9]	0	0	0	0	0	0	0	0	0	0	0	0	1	0	0
ADW71153.1	AciX9_3871 [Acidobacterium sp. MP5ACTX9]	0	3	1	0	0	0	0	0	1	0	0	0	0	0	0
AFL80587.1	Aeqsu_1089 [Aequorivita sublithincola DSM 14238]	0	0	0	0	3	0	2	0	0	0	0	0	0	0	0
AHE51431.1	AH4AK4_4032 [Aeromonas hydrophila 4AK4]	0	0	1	0	0	0	0	0	0	0	0	0	0	0	0
AHX71486.1	V429_22595 (LacZ) [Aeromonas hydrophila pc104A]	0	0	0	0	0	0	0	0	0	1	0	0	0	0	0
ACM26792.1	Arad_2651 (ManB2) [Agrobacterium radiobacter K84]	0	0	2	0	0	0	0	0	0	0	0	0	0	1	0
ADY64468.1	AGROH133_06237 (ManA) [Agrobacterium sp. H13-3]	0	1	1	0	0	0	0	0	0	0	0	0	0	0	0
AHK01383.1	X971_1501 [Agrobacterium tumefaciens LBA4213 (Ach5)]	0	1	1	0	0	0	0	0	0	0	0	0	0	0	0
ACD04657.1	Amuc_0824 [Akkermansia muciniphila ATCC BAA-835]	0	0	1	0	0	0	0	1	0	0	0	0	0	0	0
AFV83763.1	amad1_01155 [Alteromonas macleodii AltDE1]	0	0	0	0	0	0	1	0	0	0	0	0	0	0	0
AGP80248.1	I533_01255 (LacZ) [Alteromonas macleodii str. 'Aegean Sea MED64']	0	0	1	0	0	0	0	0	0	0	0	0	0	0	0
AGP80212.1	I533_01075 [Alteromonas macleodii str. 'Aegean Sea MED64']	0	0	0	0	1	0	0	0	0	0	0	0	0	0	0
ACG64593.1	MADE_00275 [Alteromonas macleodii 'Deep ecotype']	0	0	0	0	0	0	0	0	0	0	0	0	0	1	0
AGP84036.1	I607_01120 [Alteromonas macleodii str. 'Ionian Sea U4']	0	0	0	0	1	0	0	0	0	0	0	0	0	0	0
AGQ00103.1	I636_01125 [Alteromonas macleodii str. 'Ionian Sea UM4b']	0	0	0	0	0	0	1	0	0	0	0	0	0	0	0
AEF04924.1	ambt_17095 (LacZ) [Alteromonas sp. SN2]	0	0	0	1	0	0	0	0	0	0	0	0	0	0	0
BAM48364.1	AXY_22320 [Amphibacillus xylanus NBRC 15112]	0	0	0	0	1	0	0	0	0	0	0	0	0	0	0
AGT84364.1	B737_3700 [Amycolatopsis mediterranei RB]	0	0	1	0	0	0	0	0	0	0	0	0	0	0	0
ADJ47465.1	AMED_5714 [Amycolatopsis mediterranei U32]	0	0	0	0	1	0	0	0	0	0	0	0	0	0	0
AIJ21769.1	AMETH_1677 [Amycolatopsis methanolica 239]	0	0	0	0	0	0	0	1	0	0	0	0	0	0	0
AGM08857.1	AORI_6274 [Amycolatopsis orientalis HCCB10007]	0	0	0	0	1	0	0	0	0	0	0	0	0	0	0
BAJ62595.1	ANT_05610 [Anaerolinea thermophila UNI-1]	0	0	0	0	0	0	0	1	0	0	0	0	0	1	0
ADU14362.1	Astex_2723 [Asticcacaulis excentricus CB 48 CS 48]	0	0	0	0	0	0	0	0	0	0	0	1	0	0	0
ADU14842.1	Astex_3207 [Asticcacaulis excentricus CB 48 CS 48]	0	0	0	0	0	0	0	0	0	0	0	0	0	0	1
ADU15033.1	Astex_3400 [Asticcacaulis excentricus CB 48 CS 48]	0	0	0	0	0	0	0	0	0	0	0	0	0	1	0
ADU14239.1	Astex_2594 [Asticcacaulis excentricus CB 48 CS 48]	0	6	0	0	0	0	0	0	0	0	0	0	0	0	0
AIB15760.1	ABAZ39_28260 [Azospirillum brasilense Az39]	0	0	0	0	0	0	1	0	0	0	0	0	0	0	0
ADU29314.1	Bcell_1041 [Bacillus cellulosilyticus DSM 2522]	0	0	1	0	0	0	0	0	0	0	0	0	0	0	0
ADE69198.1	BMQ_2169 (LacZ) [Bacillus megaterium QM B1551]	0	0	1	0	0	0	0	0	0	0	0	0	0	0	0
ADH97955.1	Bsel_0416 [Bacillus selenitireducens MLS10]	0	0	0	0	0	0	0	0	1	0	0	0	0	0	0
ADI00707.1	Bsel_3225 [Bacillus selenitireducens MLS10]	0	0	0	0	0	0	0	0	1	0	0	0	0	0	0
AII69020.1	GV66_15515 [Bacteroides dorei HS1_L3_B_079]	0	0	0	0	0	0	1	0	0	0	0	0	0	0	0
AII67443.1	GV66_06860 [Bacteroides dorei HS1_L3_B_079]	0	0	1	0	0	0	0	0	0	0	0	0	0	0	0
AII65734.1	EL88_22395 [Bacteroides dorei HS1_L1_B_010]	0	0	0	0	1	0	0	0	0	0	0	0	0	0	0
AII65967.1	EL88_23690 [Bacteroides dorei HS1_L1_B_010]	0	0	0	0	0	0	0	0	0	1	0	0	0	0	0
AII65460.1	EL88_20900 [Bacteroides dorei HS1_L1_B_010]	0	1	0	0	0	0	0	0	0	0	0	0	0	0	0
AII66503.1	GV66_01690 [Bacteroides dorei HS1_L3_B_079]	1	0	0	0	0	0	0	0	0	0	0	0	0	0	0
CBW22263.1	BF638R_1737 (BgaA) [Bacteroides fragilis 638R]	0	0	0	0	1	0	0	0	0	0	0	0	0	0	0
CAH06410.1	BF0665 [Bacteroides fragilis NCTC 9343]	0	1	0	0	0	0	0	0	0	0	0	0	0	0	0
CAH07509.1	BF1810 (BmnA) [Bacteroides fragilis NCTC 9343]	0	0	0	0	1	0	0	0	0	0	0	0	0	0	0
CAH07644.1	BF1946 [Bacteroides fragilis NCTC 9343]	1	0	0	0	0	0	0	0	0	0	0	0	0	0	0
CAH08779.1	BF3084 [Bacteroides fragilis NCTC 9343]	0	0	0	0	0	0	0	1	0	0	0	0	0	0	0
BAD50119.1	BF3375 [Bacteroides fragilis YCH46]	0	0	1	0	0	0	0	0	0	0	0	0	0	0	0
BAD48412.1	BF1664 [Bacteroides fragilis YCH46]	0	0	0	0	2	0	0	0	0	0	0	0	0	0	0
BAD49989.1	BF3244 [Bacteroides fragilis YCH46]	0	0	0	0	1	0	0	0	0	0	0	0	0	0	0
BAD46941.1	BF0192 [Bacteroides fragilis YCH46]	0	0	0	0	1	0	0	0	0	0	0	0	0	1	0
BAD48480.1	BF1733 (BmnA) [Bacteroides fragilis YCH46]	0	0	0	0	1	0	0	0	0	0	0	0	0	0	0
BAD47085.1	BF0336 [Bacteroides fragilis YCH46]	0	0	0	0	0	0	0	1	0	0	0	0	0	0	0
BAD47680.1	BF0929 [Bacteroides fragilis YCH46]	0	0	0	0	1	0	0	0	0	0	0	0	0	0	0
ADV42527.1	Bache_0502 [Bacteroides helcogenes P 36-108 ATCC 35417]	0	0	1	0	0	0	0	0	0	0	0	0	0	0	0
EDY95440.1	BACPLE_01706 [Bacteroides plebeius DSM 17135]	0	0	1	1	0	0	0	0	0	0	0	2	0	1	0
ADY35474.1	Bacsa_0882 [Bacteroides salanitronis DSM 18170]	0	0	0	0	1	0	0	0	0	0	0	0	0	0	0
ADY36081.1	Bacsa_1509 [Bacteroides salanitronis DSM 18170]	0	0	0	0	0	0	0	0	0	0	0	0	0	1	0
AAO78028.1	BT2922 [Bacteroides thetaiotaomicron VPI-5482]	0	0	0	0	1	0	1	0	0	0	0	0	0	0	0
AAO75565.1	(3.2.1.25) [Bacteroides thetaiotaomicron VPI-5482]	0	0	0	1	0	0	0	0	0	0	0	0	0	0	1
AAO76090.1	BT0983 [Bacteroides thetaiotaomicron VPI-5482]	0	0	1	0	0	0	0	0	0	0	0	0	0	0	0
AAO78446.1	BT3340 [Bacteroides thetaiotaomicron VPI-5482]	0	0	1	0	0	0	0	0	0	0	0	0	0	0	0
AAO77298.1	BT2191+BT2190 [Bacteroides thetaiotaomicron VPI-5482]	0	0	0	0	1	0	0	0	0	0	0	0	0	1	0
ABR38021.1	BVU_0301 [Bacteroides vulgatus ATCC 8482]	0	2	0	0	0	0	0	0	0	0	0	0	0	0	0
ABR38109.1	BVU_0391 [Bacteroides vulgatus ATCC 8482]	0	1	0	0	2	0	0	1	0	0	0	0	0	0	0
ABR38246.1	BVU_0536 [Bacteroides vulgatus ATCC 8482]	0	0	0	0	0	0	0	0	0	0	0	0	0	1	0
CBK67088.1	BXY_20020 [Bacteroides xylanisolvens XB1A]	0	0	0	0	0	0	0	0	0	0	0	0	1	1	0
CBK67286.1	BXY_22110 [Bacteroides xylanisolvens XB1A]	0	0	0	0	1	0	0	0	0	0	0	0	0	0	0
CBK65647.1	BXY_03810 [Bacteroides xylanisolvens XB1A]	0	1	0	0	0	0	0	0	0	0	0	0	0	0	0
CBK65649.1	BXY_03840 [Bacteroides xylanisolvens XB1A]	0	0	0	0	0	0	0	0	0	0	0	1	0	0	0
CBK67664.1	BXY_26210 [Bacteroides xylanisolvens XB1A]	0	0	0	0	1	0	0	0	0	0	0	0	0	0	0
CBK67834.1	BXY_28070 [Bacteroides xylanisolvens XB1A]	0	0	0	0	1	0	0	0	0	0	0	0	0	0	0
AHF12561.1	BARVI_07050 [Barnesiella viscericola DSM 18177 C46, DSM 18177]	0	0	0	0	0	0	0	0	0	0	0	0	0	1	0
AHF12350.1	BARVI_05680 [Barnesiella viscericola DSM 18177 C46, DSM 18177]	0	1	0	0	0	0	0	0	0	0	0	0	0	0	0
ACQ78303.1	Bcav_0037 [Beutenbergia cavernae DSM 12333]	0	0	0	0	1	0	0	1	0	0	0	0	0	0	0
CAC14566.2	beta-galactosidase (BIF3) (3.2.1.23) [Bifidobacterium bifidum DSM 20215]	0	1	0	0	0	0	0	0	0	0	0	0	0	0	0
AEF27548.1	HMPREF9228_1260 [Bifidobacterium breve ACS-071-V-Sch8b]	0	0	0	0	0	0	0	0	0	0	0	0	0	0	2
ADB10673.1	BDP_2112 (Lacz1) [Bifidobacterium dentium Bd1]	0	0	0	0	0	0	0	0	0	0	0	0	0	1	0
BAJ67866.1	BLIJ_0272 [Bifidobacterium longum subsp. infantis JCM 1222]	0	0	1	0	0	0	0	0	0	0	0	0	0	0	0
CAB44428.1	beta-galactosidase (LacZ) (3.2.1.23) [Bifidobacterium longum subsp. longum MB219]	0	1	0	0	0	0	0	0	0	0	0	0	0	0	0
ADL01390.1	Bresu_2080 [Brevundimonas subvibrioides ATCC 15264]	0	1	0	0	0	0	0	0	0	0	0	0	0	0	0
ADL35923.1	bpr_III237 [Butyrivibrio proteoclasticus B316]	0	0	0	0	1	0	0	0	0	0	0	0	0	0	0
ADQ47175.1	Calkro_2352 [Caldicellulosiruptor kronotskyensis 2002]	0	0	0	0	2	0	0	0	0	0	0	0	0	0	0
BAL98552.1	CLDAP_05130 [Caldilinea aerophila DSM 14535 = NBRC 104270]	0	0	0	0	1	0	0	0	1	0	0	0	0	0	0
ABF43484.1	Acid345_4484 [Candidatus Koribacter versatilis Ellin345]	0	0	0	0	0	0	1	0	0	0	0	0	0	0	1
ABF43242.1	Acid345_4242 [Candidatus Koribacter versatilis Ellin345]	0	0	0	0	1	0	0	0	0	0	0	0	0	0	0
ABF39584.1	Acid345_0579 [Candidatus Koribacter versatilis Ellin345]	0	4	2	1	0	0	0	0	0	0	0	0	0	0	2
ABJ85566.1	Acid_4607 [Solibacter usitatus Ellin6076]	0	0	0	0	0	0	0	0	0	0	0	0	0	0	1
ABJ85860.1	Acid_4901 [Solibacter usitatus Ellin6076]	0	0	0	0	1	0	0	0	0	0	0	0	0	0	0
ABJ88212.1	Acid_7301 [Solibacter usitatus Ellin6076]	0	0	1	0	1	0	0	0	0	0	0	0	0	0	0
AEK23864.1	Ccan_17480 [Capnocytophaga canimorsus Cc5]	0	0	1	0	1	0	0	0	0	0	0	0	0	0	0
ACU92566.1	Coch_1011 [Capnocytophaga ochracea DSM 7271]	0	0	0	0	1	0	0	0	0	0	0	0	0	0	0
ACU93352.1	Coch_1807 [Capnocytophaga ochracea DSM 7271]	0	0	1	0	0	0	0	0	0	0	0	0	0	0	0
ACU92148.1	Coch_0590 [Capnocytophaga ochracea DSM 7271]	0	0	0	0	1	0	0	0	0	0	0	0	0	0	0
ADG11711.1	Cseg_3275 [Caulobacter segnis ATCC 21756]	0	0	0	0	0	0	1	0	0	0	0	0	0	0	0
ADV49788.1	Celal_2500 [Cellulophaga algicola DSM 14237]	0	0	0	0	3	0	0	0	0	0	0	0	0	0	0
ADV49810.1	Celal_2523 [Cellulophaga algicola DSM 14237]	0	0	0	0	1	0	0	0	0	0	0	0	0	0	0
ADV50844.1	Celal_3583 [Cellulophaga algicola DSM 14237]	1	0	0	0	1	1	0	0	0	0	0	0	0	1	0
ADY28240.1	Celly_0405 [Cellulophaga lytica DSM 7489]	0	0	0	0	2	0	0	0	0	0	0	0	0	0	0
ADY28259.1	Celly_0424 [Cellulophaga lytica DSM 7489]	0	0	1	0	3	0	0	0	0	0	0	0	0	0	1
ACZ98632.1	ORF (fragment) [Cellulosilyticum ruminicola CGMCC 1.5065]	0	0	0	1	0	0	0	0	0	0	0	0	0	0	0
ACU59246.1	Cpin_1750 [Chitinophaga pinensis DSM 2588]	0	0	0	1	0	0	0	0	0	0	0	0	0	0	0
ACU60088.1	Cpin_2605 [Chitinophaga pinensis DSM 2588]	0	0	0	0	0	0	1	0	0	0	0	0	0	0	0
ACU64456.1	Cpin_7055 [Chitinophaga pinensis DSM 2588]	0	0	0	0	0	0	1	0	0	0	0	0	0	0	0
BAP30706.1	CHSO_1669 [Chryseobacterium sp. StRB126]	0	0	0	0	2	0	1	0	0	0	0	0	0	0	1
CDZ84493.1	BN1086_02648 (Lacz_1) [Citrobacter koseri]	0	0	1	0	0	0	0	0	0	0	0	0	0	0	0
CBG87181.1	ROD_03991 (LacZ) [Citrobacter rodentium ICC168]	0	0	0	0	0	0	1	0	0	0	0	0	0	0	0
ACL75354.1	Ccel_0992 [Clostridium cellulolyticum H10 ATCC 35319]	0	0	1	0	0	0	0	0	0	0	0	1	0	0	0
ADL53165.1	Clocel_3489 [Clostridium cellulovorans 743B]	0	1	0	0	0	0	0	0	0	0	0	0	0	0	0
ADL05530.1	Closa_2996 [Clostridium saccharolyticum WM1]	0	0	0	0	1	0	0	0	0	0	0	0	0	0	0
AEY65175.1	Clo1100_0918 [Clostridium sp. BNL1100]	0	0	0	0	1	0	0	0	0	0	0	0	0	0	0
ADE53254.1	Caka_0227 [Coraliomargarita akajimensis DSM 45221]	0	0	1	0	0	0	0	0	0	0	0	1	0	0	0
ADE53390.1	Caka_0365 [Coraliomargarita akajimensis DSM 45221]	0	0	0	0	1	0	0	0	0	0	0	0	0	0	0
ADE53393.1	Caka_0368 [Coraliomargarita akajimensis DSM 45221]	0	0	0	0	0	0	2	0	0	0	0	0	0	0	0
ADE53632.1	Caka_0607 [Coraliomargarita akajimensis DSM 45221]	0	0	0	0	1	0	0	0	0	0	0	0	0	0	0
ACO47731.1	Deide_2p00690 [Deinococcus deserti VCD115]	0	0	1	0	0	0	0	0	0	0	0	0	0	0	0
ABF43917.1	Dgeo_2483 [Deinococcus geothermalis DSM 11300]	0	0	0	0	0	0	0	0	0	0	0	0	0	0	1
AFD24628.1	DGo_CA0701 [Deinococcus gobiensis I-0]	0	0	0	0	1	0	0	0	0	0	0	0	0	0	0
BAH74799.1	DMR_13080 [Desulfovibrio magneticus RS-1]	2	14	0	0	1	0	0	1	0	0	0	0	1	1	0
ADM97757.1	Dda3937_00746 (LacZ) [Dickeya dadantii 3937]	0	0	0	0	0	0	0	0	0	0	0	1	0	0	0
AHW59651.1	FH5T_08765 [Draconibacterium orientale FH5T]	0	0	0	0	2	0	2	0	0	0	0	0	0	0	0
AHW60428.1	FH5T_14495 [Draconibacterium orientale FH5T]	0	0	0	0	1	0	0	0	0	0	0	1	0	0	1
AHW60534.1	FH5T_15250 [Draconibacterium orientale FH5T]	0	0	1	0	1	0	0	0	0	0	0	0	0	0	0
AHW60537.1	FH5T_15265 [Draconibacterium orientale FH5T]	0	1	0	0	0	0	0	0	0	0	0	0	0	0	0
AHW59278.1	FH5T_05795 [Draconibacterium orientale FH5T]	0	0	1	0	0	0	0	0	0	0	0	0	0	0	0
AHW59436.1	FH5T_07025 [Draconibacterium orientale FH5T]	0	1	0	0	1	0	1	0	0	0	0	0	0	0	0
AHW59486.1	FH5T_07470 [Draconibacterium orientale FH5T]	0	0	0	0	1	0	0	0	0	0	0	0	0	0	0
AHW60283.1	FH5T_13395 [Draconibacterium orientale FH5T]	0	0	0	0	1	0	0	0	0	0	0	0	0	0	0
AGA76769.1	Echvi_0485 [Echinicola vietnamensis DSM 17526]	0	0	1	0	0	0	0	0	0	0	0	0	0	0	0
AGA77934.1	Echvi_1669 [Echinicola vietnamensis DSM 17526]	0	0	0	0	1	0	0	0	0	0	0	0	0	0	0
AGA77963.1	Echvi_1698 [Echinicola vietnamensis DSM 17526]	0	0	0	0	2	0	0	0	0	0	0	0	0	0	0
AGA78394.1	Echvi_2143 [Echinicola vietnamensis DSM 17526]	0	1	0	0	2	0	0	1	0	0	0	0	0	0	0
AGA79544.1	Echvi_3321 [Echinicola vietnamensis DSM 17526]	0	0	0	0	1	0	0	0	0	0	0	0	0	0	0
AGH73894.1	ETAC_08865 [Edwardsiella tarda C07-087]	0	0	1	0	0	0	0	0	0	0	0	0	0	0	0
ACV55172.1	Elen_1202 [Eggerthella lenta DSM 2243]	0	0	0	0	0	0	0	0	0	0	0	0	0	1	0
AIL44990.1	BD94_1215 [Elizabethkingia anophelis NUHP1]	0	0	0	1	0	1	1	0	0	0	0	0	0	0	0
AIL47318.1	BD94_3543 [Elizabethkingia anophelis NUHP1]	0	0	0	1	0	0	0	0	1	0	0	0	0	1	0
AIL47443.1	BD94_3668 [Elizabethkingia anophelis NUHP1]	0	0	1	0	0	0	0	0	0	0	0	0	0	0	0
AFK02285.1	Emtol_1136 [Emticicia oligotrophica DSM 17448]	0	0	2	0	0	0	1	1	0	0	0	0	0	0	0
BAL73169.1	ORF [Ensifer adhaerens CSBa]	0	2	0	0	0	0	0	0	0	0	0	0	0	0	0
AHW95380.1	DI57_13555 (LacZ) [Enterobacter asburiae L1]	0	0	0	0	1	0	0	0	0	0	0	0	0	0	0
AEW72425.1	EcWSU1_00985 (LacZ) [Enterobacter cloacae EcWSU1]	0	0	0	0	1	0	0	0	0	0	0	0	0	0	0
EEV37821.1	ECBG_00090 [Enterococcus casseliflavus EC20]	0	3	0	0	0	0	0	0	0	0	0	0	0	0	0
ACR62057.1	BWG_3744 [Escherichia coli BW2952 K-12]	0	3	0	0	1	0	0	0	0	0	0	0	0	0	0
ACB17296.1	EcSMS35_0375 [Escherichia coli SMS-3-5]	0	0	0	0	1	0	0	0	0	0	0	0	0	0	0
CBK99166.1	FP2_17190 [Faecalibacterium prausnitzii L2-6 L2/6]	0	0	0	0	0	0	0	0	0	0	0	1	0	0	0
CBL02867.1	FPR_27540 [Faecalibacterium prausnitzii SL3/3]	0	0	0	0	0	0	0	0	0	0	0	0	0	2	0
CCH02350.1	FAES_4351 (LacZ) [Fibrella aestuarina BUZ 2]	0	0	0	0	0	0	0	1	0	0	0	0	0	0	0
AIE85224.1	OP10G_1856 [Fimbriimonas ginsengisoli Gsoil 348]	0	0	1	0	0	0	0	0	0	0	0	0	0	0	0
AIE84282.1	OP10G_0914 [Fimbriimonas ginsengisoli Gsoil 348]	0	0	2	0	0	0	0	0	0	0	0	0	0	0	0
CCG52450.1	KQS_02290 [Flavobacterium indicum GPTSA100-9]	0	0	0	0	2	0	0	0	0	0	0	0	0	1	0
ABQ05069.1	Fjoh_2038 [Flavobacterium johnsoniae UW101]	0	0	0	0	0	0	0	1	0	0	0	0	0	0	0
ABQ05112.1	Fjoh_2082 [Flavobacterium johnsoniae UW101]	2	2	2	1	0	0	0	0	0	0	0	0	0	1	0
ABQ05735.1	Fjoh_2713 [Flavobacterium johnsoniae UW101]	0	0	0	0	1	0	0	0	0	0	0	0	0	0	0
ABQ06392.1	Fjoh_3378 [Flavobacterium johnsoniae UW101]	0	0	0	0	1	0	0	0	0	0	0	0	0	0	0
ABQ07205.1	Fjoh_4197 [Flavobacterium johnsoniae UW101]	0	0	4	0	0	0	0	1	0	0	0	0	0	3	0
ABQ07206.1	Fjoh_4198 [Flavobacterium johnsoniae UW101]	1	2	1	1	0	2	0	1	0	0	0	0	1	0	0
AAX48919.1	beta-galactosidase (Gal4214-1) (3.2.1.23) [Flavobacterium sp. 4214]	0	1	0	0	0	0	0	0	0	0	0	0	0	0	0
AEA45384.1	Fluta_3412 [Fluviicola taffensis DSM 16823]	0	0	0	0	0	0	0	0	0	0	0	0	0	2	0
CDF79791.1	BN863_20790 [Formosa agariphila KMM 3901 type strain: KMM 3901]	0	0	0	0	0	0	1	1	0	0	0	1	0	0	0
CDF79799.1	BN863_20870 [Formosa agariphila KMM 3901 type strain: KMM 3901]	1	0	0	0	4	0	1	0	0	0	0	0	0	1	2
CDF79833.1	BN863_21210 [Formosa agariphila KMM 3901 type strain: KMM 3901]	0	0	0	0	1	0	0	0	0	0	0	0	0	0	0
CDF79862.1	BN863_21500 [Formosa agariphila KMM 3901 type strain: KMM 3901]	0	0	1	0	0	0	0	0	0	0	0	0	0	0	0
CDF79882.1	BN863_21700 [Formosa agariphila KMM 3901 type strain: KMM 3901]	0	0	0	0	2	0	0	0	0	0	0	0	0	0	0
CDF79909.1	BN863_21970 [Formosa agariphila KMM 3901 type strain: KMM 3901]	0	1	0	1	1	0	0	0	0	0	0	0	0	1	0
CDF79918.1	BN863_22060 [Formosa agariphila KMM 3901 type strain: KMM 3901]	0	0	0	0	1	0	0	0	0	0	0	0	0	0	1
CDF80799.1	BN863_30870 [Formosa agariphila KMM 3901 type strain: KMM 3901]	0	0	0	0	2	0	0	0	0	0	0	0	0	0	0
CDF79917.1	BN863_22050 [Formosa agariphila KMM 3901 type strain: KMM 3901]	2	1	0	0	5	0	0	0	1	0	0	0	0	1	1
ABW12595.1	Franean1_3187 [Frankia sp. EAN1pec]	0	0	0	0	0	0	0	1	0	0	0	0	0	0	0
AHG91996.1	J421_4459 [Gemmatimonadetes bacterium KBS708]	0	0	0	0	0	0	0	0	0	0	0	0	0	1	0
AHA58125.1	M493_04994 [Geobacillus sp. JF8]	0	1	0	0	0	0	0	0	0	0	0	0	0	0	0
ACX77216.1	GYMC61_0534 [Geobacillus sp. Y412MC61]	0	1	0	0	0	0	0	0	0	0	0	0	0	0	0
AEH49566.1	Geoth_3746 [Geobacillus thermoglucosidasius C56-YS93]	0	0	0	0	0	0	0	0	0	0	0	0	0	0	1
ADB73110.1	Gobs_0309 [Geodermatophilus obscurus DSM 43160]	0	0	0	0	0	0	0	1	0	0	0	0	0	0	0
AHN26604.1	GAPWK_2031 [Gilliamella apicola wkB30]	0	0	0	0	0	0	0	0	0	0	0	0	0	1	0
AEE21191.1	Glaag_0222 [Glaciecola agarilytica 4H-3-7+YE-5]	0	0	0	0	0	0	1	1	0	0	0	0	0	1	0
AEE23892.1	Glaag_2955 [Glaciecola agarilytica 4H-3-7+YE-5]	0	0	0	0	0	0	0	0	0	0	0	0	0	0	3
AEP28380.1	GNIT_0226 (LacZ) [Glaciecola nitratireducens FR1064]	0	0	0	2	0	0	0	0	0	0	0	0	0	0	0
AGH42467.1	C427_0357 (LacZ) [Glaciecola psychrophila 170]	0	0	0	3	0	0	0	0	0	0	0	0	0	0	0
AGH46928.1	C427_4829 [Glaciecola psychrophila 170]	0	4	2	0	2	1	3	1	0	0	0	0	0	0	1
CAL65022.1	orf32 [Gramella forsetii KT0803]	0	0	0	0	0	0	0	0	0	0	0	0	0	1	0
CAL65354.1	orf365 [Gramella forsetii KT0803]	0	0	0	0	1	0	0	0	0	0	0	0	0	0	0
AEU35467.1	AciX8_1122 [Granulicella mallensis MP5ACTX8]	0	0	0	0	1	0	0	0	0	0	0	0	0	0	0
AEU36972.1	AciX8_2662 [Granulicella mallensis MP5ACTX8]	0	0	0	0	0	0	0	0	0	0	0	0	0	1	0
AEU38011.1	AciX8_3725 [Granulicella mallensis MP5ACTX8]	0	0	2	0	1	0	0	0	0	0	0	0	0	0	0
ADO76541.1	Hprae_0386 [Halanaerobium praevalens DSM 2228]	0	0	0	0	0	0	0	1	0	0	0	0	0	0	0
AEE53229.1	Halhy_5404 [Haliscomenobacter hydrossis DSM 1100]	0	0	0	0	1	0	0	0	0	0	0	0	0	0	0
AEE52727.1	Halhy_4898 [Haliscomenobacter hydrossis DSM 1100]	0	0	0	1	0	0	0	0	0	0	0	0	0	0	1
AII50863.1	N008_02565 [Hymenobacter sp. APR13]	0	0	0	0	0	1	0	0	0	0	0	0	0	0	0
AHJ98424.1	Hsw_2829 [Hymenobacter swuensis DY53]	0	0	0	0	0	0	0	0	0	0	0	1	0	1	1
BAN00553.1	YM304_02390 [Acidimicrobidae bacterium YM16-304]	0	1	0	0	0	0	0	0	0	0	0	0	0	0	0
BAN01065.1	YM304_07510 [Acidimicrobidae bacterium YM16-304]	0	0	2	0	0	0	0	0	0	0	0	0	0	1	0
BAN02892.1	YM304_25780 [Acidimicrobidae bacterium YM16-304]	0	0	1	0	0	0	0	0	0	0	0	0	0	0	0
CDG81241.1	GJA_582 [Janthinobacterium agaricidamnosum NBRC 102515 = DSM 9628]	0	0	0	0	0	0	0	0	0	0	0	0	1	0	0
CDG82979.1	GJA_2345 [Janthinobacterium agaricidamnosum NBRC 102515 = DSM 9628]	0	0	0	0	0	0	0	1	0	0	0	0	0	0	0
CDO14464.1	BN49_2708 [Klebsiella pneumoniae Kp52.145]	0	11	0	0	0	0	0	4	2	0	0	2	1	4	0
EKQ01899.1	LCA12A_2610 [Lactobacillus casei 12A]	0	0	0	0	0	0	0	0	0	0	0	0	0	1	0
ABJ58656.1	LBUL_1114 [Lactobacillus delbrueckii subsp. bulgaricus ATCC BAA-365]	0	0	0	0	0	0	0	1	0	0	0	0	0	0	0
AET30597.1	MI1_05765 (LacZ) [Leuconostoc mesenteroides subsp. mesenteroides J18]	0	0	0	0	0	0	0	0	0	0	0	0	0	2	0
AEE95420.1	Mahau_0200 [Mahella australiensis 50-1 BON]	0	0	2	0	0	0	0	0	0	0	0	1	0	1	0
AEE97750.1	Mahau_2606 [Mahella australiensis 50-1 BON]	0	1	0	0	0	0	0	0	0	0	0	0	0	0	0
EAR02423.1	FB2170_04030 [Flavobacteriales bacterium HTCC2170]	0	0	2	0	0	0	0	0	0	0	0	0	0	0	0
EAR01320.1	FB2170_11386 [Flavobacteriales bacterium HTCC2170]	0	0	0	0	0	0	0	0	0	0	0	1	0	1	0
EAR01849.1	FB2170_15013 [Flavobacteriales bacterium HTCC2170]	0	0	1	0	0	0	0	0	0	0	0	0	0	1	0
EAQ99726.1	FB2170_10449 [Flavobacteriales bacterium HTCC2170]	0	0	0	0	2	0	1	0	0	0	0	0	0	0	0
AFN73807.1	MROS_0564 [Melioribacter roseus P3M]	0	1	1	0	0	0	0	0	0	0	0	0	0	0	0
AFN74879.1	MROS_1645 [Melioribacter roseus P3M]	0	0	0	0	1	0	0	0	0	0	0	0	0	0	0
AFN75311.1	MROS_2081 [Melioribacter roseus P3M]	0	0	0	0	1	1	0	0	0	0	0	0	0	0	0
AFN75550.1	MROS_2320 [Melioribacter roseus P3M]	0	0	4	0	0	0	0	0	0	0	0	0	0	3	0
AFN73808.1	MROS_0565 [Melioribacter roseus P3M]	0	0	0	0	0	0	0	0	0	0	0	0	0	0	1
ADQ83210.1	MPQ_0011 (LacZ) [Methylovorus sp. MP688]	0	0	2	0	0	0	0	0	0	0	0	0	0	0	0
BAJ75005.1	MTES_2041 [Microbacterium testaceum StLB037]	0	0	0	0	0	0	0	0	0	0	0	0	0	1	0
CCH87627.1	MODMU_2192 [Modestobacter marinus BC501]	0	1	0	0	0	0	0	0	0	0	0	0	0	0	0
AEM69620.1	Murru_0569 [Muricauda ruestringensis DSM 13258]	0	0	0	0	1	0	0	0	0	0	0	0	0	1	1
AHF14716.1	NIASO_04965 [Niabella soli DSM 19437 JS13-8; DSM 19437]	0	0	0	0	0	0	0	0	0	0	0	0	0	0	1
AHF16887.1	NIASO_20260 [Niabella soli DSM 19437 JS13-8; DSM 19437]	0	0	0	0	1	0	0	0	0	0	0	0	0	0	0
AHF15126.1	NIASO_08055 [Niabella soli DSM 19437 JS13-8; DSM 19437]	0	0	0	0	1	0	0	0	0	0	0	0	0	0	0
AEV98728.1	Niako_2384 [Niastella koreensis GR20-10]	0	0	0	0	2	0	0	0	0	0	0	0	0	0	0
AEV98753.1	Niako_2409 [Niastella koreensis GR20-10]	0	1	0	0	0	0	0	0	0	0	0	0	0	0	0
AEV99912.1	Niako_3612 [Niastella koreensis GR20-10]	0	1	0	0	0	0	0	0	0	0	0	0	0	0	0
AEW00399.1	Niako_4121 [Niastella koreensis GR20-10]	1	0	0	0	0	0	0	0	0	0	0	0	0	0	0
AEW00660.1	Niako_4401 [Niastella koreensis GR20-10]	2	0	0	0	0	0	0	0	0	0	0	0	0	1	0
AEW01234.1	Niako_4995 (fragment) [Niastella koreensis GR20-10]	0	0	0	0	1	0	0	0	0	0	0	0	0	0	0
AGC75459.1	DDD_0332 [Nonlabens dokdonensis DSW-6]	0	0	1	0	1	0	0	0	0	0	0	0	1	0	0
AGC78738.1	DDD_3611 [Nonlabens dokdonensis DSW-6]	0	0	0	0	1	0	0	0	0	0	0	0	0	0	0
ADY31985.1	Odosp_0913 [Odoribacter splanchnicus DSM 20712]	0	0	0	0	3	0	0	0	0	0	0	0	0	0	0
AHF90866.1	OPIT5_12265 [Opitutaceae bacterium TAV5]	0	1	0	0	0	0	0	0	0	0	0	0	0	0	0
ACB74568.1	Oter_1283 [Opitutus terrae PB90-1]	0	0	0	0	0	0	0	0	0	0	0	1	0	0	0
ACB75334.1	Oter_2051 [Opitutus terrae PB90-1]	0	0	0	0	1	0	0	0	0	0	0	0	0	0	0
ACB76629.1	Oter_3352 [Opitutus terrae PB90-1]	1	3	0	0	0	0	1	0	0	0	0	0	0	0	0
ACB76899.1	Oter_3622 [Opitutus terrae PB90-1]	0	0	0	0	0	0	0	0	0	0	0	1	0	0	0
AFL96730.1	Ornrh_0527 [Ornithobacterium rhinotracheale DSM 15997]	0	0	0	2	0	0	0	0	0	0	0	0	0	0	0
AFL98098.1	Ornrh_1953 [Ornithobacterium rhinotracheale DSM 15997]	0	0	0	0	1	0	0	0	0	0	0	0	0	0	0
AFL98261.1	Ornrh_2129 [Ornithobacterium rhinotracheale DSM 15997]	0	1	0	0	0	0	0	0	0	0	0	0	0	1	0
AFC29657.1	PM3016_2781 [Paenibacillus mucilaginosus 3016]	0	0	0	0	2	0	0	0	0	0	0	0	0	0	1
AFH62783.1	B2K_19030 [Paenibacillus mucilaginosus K02]	0	0	2	0	0	0	0	0	0	0	0	0	0	0	0
AFH61704.1	B2K_13410 [Paenibacillus mucilaginosus K02]	0	0	0	1	1	0	0	0	0	0	0	0	0	0	0
AFH61578.1	B2K_12730 [Paenibacillus mucilaginosus K02]	0	0	0	0	1	0	0	0	0	0	0	0	0	0	0
AEI40802.1	KNP414_02241 [Paenibacillus mucilaginosus KNP414]	0	0	2	0	0	0	0	0	0	0	0	0	0	0	0
AHC19467.1	X809_09615 [Paenibacillus polymyxa CR1]	0	0	1	0	0	0	1	0	0	0	0	0	0	0	0
ADM69618.1	PPE_01782 [Paenibacillus polymyxa E681]	0	0	0	0	1	0	2	0	0	0	0	0	0	0	1
CCC84717.1	PPM_1780 (BmnA) [Paenibacillus polymyxa M1]	0	0	0	0	1	0	0	0	0	0	0	0	0	0	0
ADO55950.1	PPSC2_c1978 [Paenibacillus polymyxa SC2]	0	0	0	0	1	0	0	0	0	0	0	0	0	0	0
ACS98925.1	Pjdr2_0245 [Paenibacillus sp. JDR-2]	0	0	0	0	1	0	1	0	0	0	0	0	0	0	0
ACT00441.1	Pjdr2_1779 [Paenibacillus sp. JDR-2]	0	0	0	0	0	0	0	0	0	0	0	0	0	1	0
ACT02710.1	Pjdr2_4080 [Paenibacillus sp. JDR-2]	0	0	0	0	0	0	1	0	0	0	0	0	0	0	0
ACT00283.1	Pjdr2_1616 [Paenibacillus sp. JDR-2]	0	0	1	0	0	0	0	0	0	0	0	0	0	0	0
ACX62526.1	GYMC10_0218 [Paenibacillus sp. Y412MC10]	0	0	1	0	1	0	0	0	0	0	0	1	0	0	0
ACX63067.1	GYMC10_0767 [Paenibacillus sp. Y412MC10]	0	0	0	0	1	0	0	0	0	0	0	0	0	0	0
AET60219.1	HPL003_17375 [Paenibacillus terrae HPL-003]	0	0	0	0	1	0	0	0	0	0	0	0	0	0	0
ADQ78237.1	Palpr_0075 [Paludibacter propionicigenes WB4]	0	0	0	0	1	0	0	0	0	0	0	0	0	0	0
ADQ79768.1	Palpr_1627 [Paludibacter propionicigenes WB4]	0	1	0	0	0	0	0	0	0	0	0	0	0	0	0
ADQ80273.1	Palpr_2137 [Paludibacter propionicigenes WB4]	0	0	0	0	0	0	0	0	0	0	0	1	0	0	0
ADQ78735.1	Palpr_0579 [Paludibacter propionicigenes WB4]	1	0	0	0	0	0	0	0	0	0	0	0	0	0	0
BAK13569.1	PAJ_3490 (LacZ) [Pantoea ananatis AJ13355]	1	0	0	0	0	0	0	0	0	0	0	0	0	0	0
ADU68195.1	Pat9b_0871 [Pantoea sp. At-9b]	0	0	0	0	1	0	0	0	0	0	0	0	0	0	0
ABR42751.1	BDI_0983 [Parabacteroides distasonis ATCC 8503]	0	0	0	0	0	0	0	1	0	0	0	0	0	0	0
ACU04025.1	Phep_1816 [Pedobacter heparinus DSM 2366]	0	0	0	0	0	0	0	0	0	0	0	0	0	1	0
ACU04958.1	Phep_2757 [Pedobacter heparinus DSM 2366]	0	0	0	0	1	0	1	0	0	0	0	0	0	0	0
ADY51051.1	Pedsa_0469 [Pedobacter saltans DSM 12145]	0	0	1	0	0	0	0	0	0	0	0	1	0	0	0
ADY53181.1	Pedsa_2639 [Pedobacter saltans DSM 12145]	0	1	1	0	0	0	0	0	0	0	0	0	0	0	0
ADY54242.1	Pedsa_3713 [Pedobacter saltans DSM 12145]	0	0	0	0	0	0	0	0	0	0	0	0	0	1	0
ADY52739.1	Pedsa_2187 [Pedobacter saltans DSM 12145]	0	0	2	0	0	0	0	0	0	0	0	0	0	0	0
AEQ50834.1	KKY_795 [Pelagibacterium halotolerans B2]	0	4	1	0	0	0	0	0	0	0	0	0	0	0	0
CAG21907.1	PBPRB0034 [Photobacterium profundum SS9]	0	0	0	0	1	0	0	0	0	0	0	0	0	0	0
CAG18911.1	PBPRA0480 [Photobacterium profundum SS9]	0	0	0	0	1	0	0	0	0	0	0	0	0	1	0
BAM04078.1	PSMK_19190 [Phycisphaera mikurensis NBRC 102666]	0	1	0	0	0	0	0	0	0	0	0	0	0	0	0
ADY61342.1	Plabr_3752 [Planctomyces brasiliensis DSM 5305]	0	0	0	0	1	0	0	0	0	0	0	0	0	0	0
AIJ36123.1	EG14_08860 [Porphyromonas gingivalis HG66]	0	0	0	0	1	0	0	0	0	0	0	0	0	0	0
AGB28379.1	Prede_1042 [Prevotella dentalis DSM 3688]	0	0	0	0	1	0	0	0	0	0	0	0	0	0	0
AGB28636.1	Prede_1314 [Prevotella dentalis DSM 3688]	0	0	0	0	1	0	0	0	0	0	0	0	0	0	0
AGB27456.1	Prede_0054 [Prevotella dentalis DSM 3688]	0	0	2	0	0	0	0	0	0	0	0	0	0	0	0
ADK95337.1	HMPREF0659_A6062 [Prevotella melaninogenica ATCC 25845]	0	0	0	0	1	0	0	0	0	0	0	0	0	0	0
ADK97168.1	HMPREF0659_A6982 [Prevotella melaninogenica ATCC 25845]	0	1	0	0	0	0	0	0	0	0	0	0	0	0	0
ADE82717.1	PRU_2313 [Prevotella ruminicola 23]	0	0	1	0	0	1	0	0	0	0	0	0	0	0	0
EFC70397.2	HMPREF0669_01377 [Prevotella sp. oral taxon 299 str. F0039]	0	0	0	0	1	0	0	0	0	0	0	0	0	0	0
AEE72914.1	PAZ_c17710 (Lacz1) [Propionibacterium acnes 266]	1	0	0	0	0	0	0	0	0	0	0	0	0	0	0
AID35809.1	TIA1EST1_05075 [Propionibacterium acnes hdn-1]	0	0	0	0	0	0	0	0	1	0	0	0	0	0	0
AAT83431.1	PPA1700 [Propionibacterium acnes KPA171202]	0	0	0	0	0	0	0	0	0	0	0	0	0	0	1
ABG39349.1	Patl_0821 [Pseudoalteromonas atlantica T6c]	0	0	0	0	1	0	0	0	0	0	0	0	0	1	0
ABG42564.1	Patl_4065 [Pseudoalteromonas atlantica T6c]	0	0	0	0	0	0	0	0	0	0	0	2	0	1	0
AEV35831.1	PSE_1319 [Pseudovibrio sp. FO-BEG1]	0	0	0	0	0	0	0	0	0	0	0	0	0	1	0
BAA76741.1	beta-galactosidase Z (LacZ) (3.2.1.23) [Psychromonas marina]	0	0	0	1	0	0	0	0	0	0	0	0	0	0	0
ACS54457.1	Rleg_0146 [Rhizobium leguminosarum bv. trifolii WSM1325]	0	0	0	0	0	0	0	1	0	0	0	0	0	0	0
ACS56607.1	Rleg_2333 [Rhizobium leguminosarum bv. trifolii WSM1325]	0	0	0	0	0	1	0	0	0	0	0	0	0	0	0
ACI55378.1	Rleg2_2094 [Rhizobium leguminosarum bv. trifolii WSM2304]	0	1	0	0	0	0	0	0	0	0	0	0	0	0	0
CDI08326.1	BN877_I1419 [Rhizobium sp. IRBG74]	0	0	1	0	0	0	0	0	0	0	0	0	0	0	0
CCF19682.1	NT26_1958 (ManA) [Rhizobium sp. NT-26]	0	0	1	0	0	0	0	0	0	0	0	0	0	2	0
ACY48075.1	Rmar_1185 [Rhodothermus marinus DSM 4252]	0	4	1	0	1	0	0	0	0	0	0	1	0	1	0
ACY48824.1	Rmar_1941 [Rhodothermus marinus DSM 4252]	0	0	0	0	1	0	0	0	0	0	0	0	0	0	0
AEN73543.1	Rhom172_1626 [Rhodothermus marinus SG0.5JP17-172]	0	1	1	0	2	0	0	1	0	0	0	0	0	0	0
CDN32015.1	BN938_1937 [Rikenellaceae bacterium M3]	0	0	0	0	1	0	0	0	0	0	0	0	0	0	0
AEN97234.1	RHOM_10625 [Roseburia hominis A2-183]	0	0	0	0	0	0	1	0	0	0	0	0	0	0	0
CBL08662.1	ROI_15350 [Roseburia intestinalis M50/1]	0	0	0	0	0	0	0	0	0	0	0	1	0	0	0
CBL13897.1	RO1_36470 [Roseburia intestinalis XB6B4]	1	0	1	0	0	0	0	0	0	0	0	0	0	0	0
ABQ90130.1	RoseRS_1740 [Roseiflexus sp. RS-1]	0	0	0	0	0	0	0	0	0	0	0	0	0	1	0
ABQ91087.1	RoseRS_2714 [Roseiflexus sp. RS-1]	0	0	0	0	1	0	0	0	0	0	0	0	0	0	0
ABF62001.1	TM1040_3871 [Silicibacter sp. TM1040]	0	1	0	0	0	0	0	0	0	0	0	0	0	0	0
ABN53399.1	Cthe_2197 [Clostridium thermocellum ATCC 27405]	0	0	1	0	0	0	0	0	0	0	0	0	0	0	0
ADU75841.1	Clo1313_2861 [Clostridium thermocellum DSM 1313]	0	0	1	0	0	0	0	0	0	0	0	0	0	0	0
ADU20765.1	Rumal_0208 [Ruminococcus albus 7]	0	0	0	0	0	0	0	0	0	0	0	1	0	0	0
AEI46480.1	Runsl_0020 [Runella slithyformis DSM 19594]	0	0	1	0	0	0	0	0	0	0	0	2	0	2	0
AEI48520.1	Runsl_2105 [Runella slithyformis DSM 19594]	0	0	1	0	0	0	0	0	0	0	0	0	0	0	0
ABD80547.1	Sde_1285 [Saccharophagus degradans 2-40]	0	0	0	0	1	0	1	0	0	0	0	0	0	0	0
ABD81892.1	[Saccharophagus degradans 2-40]	3	2	0	1	0	1	0	0	0	0	0	0	1	1	0
ACZ20965.1	Sked_10160 [Sanguibacter keddieii DSM 10542]	0	0	1	0	0	0	0	0	0	0	0	0	0	0	0
AAZ81660.1	beta-1,4-galactosidase (3.2.1.23) [Serratia sp. D04]	0	0	1	0	0	0	0	0	0	0	0	0	0	0	0
ACK45586.1	Sbal223_1071 [Shewanella baltica OS223]	0	0	0	0	0	0	1	0	0	0	0	0	0	0	0
ABZ75242.1	Shal_0667 [Shewanella halifaxensis HAW-EB4]	0	0	1	0	0	0	0	1	0	0	0	0	0	1	0
ABO25135.1	Shew_3269 [Shewanella loihica PV-4]	0	0	0	0	1	0	0	0	0	0	0	0	0	0	0
ABV85908.1	Spea_0580 [Shewanella pealeana ATCC 700345]	0	0	1	0	0	0	0	0	0	0	0	0	0	0	0
ACJ31167.1	swp_4524 [Shewanella piezotolerans WP3]	0	0	1	0	0	0	0	0	0	0	0	0	0	0	0
BAJ03681.1	SVI_3710 (LacZ) [Shewanella violacea DSS12]	0	0	0	0	1	0	0	0	0	0	0	0	0	0	0
AFU98802.1	M5M_08065 [Simiduia agarivorans SA1 = DSM 21679]	0	0	0	0	1	0	0	0	0	0	0	0	0	0	0
AGA25352.1	Sinac_0949 [Singulisphaera acidiphila DSM 18658]	0	0	1	0	0	0	0	0	0	0	0	0	0	0	0
AGA28603.1	Sinac_4412 [Singulisphaera acidiphila DSM 18658]	3	7	0	0	0	0	0	0	0	0	0	0	0	0	0
AEG04647.1	SinmeB_1737 [Sinorhizobium meliloti BL225C]	0	1	0	0	0	0	0	0	0	0	0	0	0	0	0
AGA06907.1	C770_GR4Chr1979 [Sinorhizobium meliloti GR4]	0	3	0	0	0	0	0	0	0	0	0	0	0	0	0
AEH82879.1	SM11_pD0046 (Lacz1) [Sinorhizobium meliloti SM11]	0	0	0	0	0	0	0	0	0	0	0	1	0	0	0
AEH78682.1	SM11_chr1406 (BmnA) [Sinorhizobium meliloti SM11]	0	2	0	0	0	0	0	0	0	0	0	0	0	0	0
AFD06331.1	Solca_1237 [Solitalea canadensis DSM 3403]	0	0	0	0	1	0	1	0	0	0	0	0	0	0	0
AFD06684.1	Solca_1617 [Solitalea canadensis DSM 3403]	0	0	1	0	0	0	0	0	0	0	0	0	0	0	0
AFD08955.1	Solca_3962 [Solitalea canadensis DSM 3403]	0	0	0	0	1	0	0	0	0	0	0	0	0	0	0
AEC02114.1	Spico_0890 [Spirochaeta coccoides DSM 17374]	0	2	0	0	0	0	0	0	0	0	0	0	0	0	0
ADY12331.1	SpiBuddy_0498 [Spirochaeta sp. Buddy]	0	0	0	0	0	0	0	0	0	0	0	0	0	1	0
ADZ78535.1	Sph21_1975 [Sphingobacterium sp. 21]	0	1	0	0	0	0	0	0	0	0	0	0	0	0	0
ADZ81084.1	Sph21_4567 (fragment) [Sphingobacterium sp. 21]	0	0	0	0	1	0	0	0	0	0	0	0	0	0	0
ACE13470.1	beta-glucuronidase (GusA) (3.2.1.31) [Sphingomonas elodea]	0	3	0	0	0	0	0	0	0	0	0	0	0	0	0
AHE54735.1	NX02_15260 [Sphingomonas sanxanigenens DSM 19645 = NX02]	0	0	0	0	0	0	0	0	0	0	0	0	0	1	0
ADN01224.1	STHERM_c02500 [Spirochaeta thermophila DSM 6192]	0	1	0	0	0	0	0	0	0	0	0	0	0	0	0
ADO69563.1	STAUR_1759 [Stigmatella aurantiaca DW4/3-1]	0	1	2	0	1	0	0	0	0	0	0	0	0	1	0
CAW93083.1	SEQ_0713 [Streptococcus equi subsp. equi 4047]	0	1	0	0	0	0	0	0	0	0	0	0	0	0	0
BAC68597.1	SAV887 [Streptomyces avermitilis MA-4680]	0	0	0	0	0	0	0	0	0	0	0	0	0	1	0
ADI13036.1	SBI_09918 [Streptomyces bingchenggensis BCW-1]	1	0	0	0	0	0	0	0	0	0	0	0	0	0	0
CAB95281.1	SCO1062 or SCG22.08c [Streptomyces coelicolor A3(2)]	0	0	0	0	0	0	0	0	0	0	0	1	0	1	0
CAB61803.1	SCO3479 or SCE65.15c [Streptomyces coelicolor A3(2)]	0	0	0	0	0	0	0	1	0	0	0	0	0	1	0
BAG23429.1	SGR_6600 [Streptomyces griseus subsp. griseus NBRC 13350]	0	0	1	0	0	0	0	1	0	0	0	0	0	0	0
AIJ12411.1	SLIV_06980 [Streptomyces lividans TK24]	0	0	0	0	0	0	0	1	0	0	0	0	0	0	0
ADW01848.1	Sfla_0382 [Streptomyces flavogriseus ATCC 33331]	0	1	0	0	0	0	0	0	0	0	0	0	0	0	0
AGP60547.1	M271_45910 [Streptomyces rapamycinicus NRRL 5491]	0	0	0	0	0	0	0	0	0	0	0	1	0	0	0
CBG69386.1	SCAB_22721 [Streptomyces scabiei 87.22]	0	0	2	0	0	0	0	0	0	0	0	0	0	0	0
CCA60183.1	SVEN_6897 [Streptomyces venezuelae ATCC 10712]	0	1	0	0	0	0	0	0	0	0	0	0	0	0	0
AEM82873.1	Strvi_3182 [Streptomyces violaceusniger Tu 4113]	0	0	0	0	1	0	0	0	0	0	0	0	0	0	0
ABK19216.1	Sfum_3546 [Syntrophobacter fumaroxidans MPOB]	1	5	0	0	0	0	0	0	0	0	0	0	0	0	0
AEW19744.1	BFO_0450 [Tannerella forsythia ATCC 43037]	0	0	0	0	0	0	0	0	0	0	0	0	0	1	0
AEE90937.1	TepRe1_0750 [Tepidanaerobacter sp. Re1]	0	0	0	0	1	0	0	0	0	0	0	0	0	0	0
AFL90114.1	Terro_3905 [Terriglobus roseus DSM 18391]	0	0	0	0	0	1	0	0	0	0	0	0	0	0	0
ADV82348.1	AciPR4_1526 [Terriglobus saanensis SP1PR4]	0	0	1	0	0	0	0	0	0	0	0	1	0	0	0
AGA56767.1	Theco_0557 [Thermobacillus composti KWC4]	0	0	0	0	1	0	0	0	0	0	0	0	0	0	0
AGA57116.1	Theco_0925 [Thermobacillus composti KWC4]	0	0	0	0	0	0	1	0	0	0	0	0	0	0	0
ACZ43341.1	Tter_2447 [Thermobaculum terrenum ATCC BAA-798]	0	1	0	0	0	0	0	0	0	0	0	0	0	0	0
ABV33481.1	Tlet_0915 [Thermotoga lettingae TMO]	0	0	3	0	0	0	0	1	0	0	0	2	0	0	0
AAD36268.1	beta-galactosidase Z (LacZ;TmLac;TM1193) (3.2.1.23) [Thermotoga maritima MSB8]	0	0	2	0	0	0	0	0	0	0	0	0	0	0	0
ADA67653.1	Tnap_1578 [Thermotoga naphthophila RKU-10]	0	0	1	0	0	0	0	0	0	0	0	0	0	0	0
AAC24219.1	beta-galactosidase (BgalB) (3.2.1.23) [Thermotoga neapolitana]	0	0	0	0	0	0	0	2	0	0	0	0	0	0	0
ABQ47566.1	Tpet_1559 [Thermotoga petrophila RKU-1]	0	0	1	0	0	0	0	0	0	0	0	0	0	0	0
ACB09632.1	TRQ2_1288 [Thermotoga sp. RQ2]	0	0	0	0	0	0	0	0	0	0	0	0	0	1	0
ACB09961.1	TRQ2_1625 [Thermotoga sp. RQ2]	0	0	1	0	0	0	0	0	0	0	0	0	0	0	0
AEE15573.1	Trebr_0119 [Treponema brennaborense DSM 12168]	0	0	0	0	1	0	0	0	0	0	0	0	0	0	0
AEJ18515.1	Spica_0351 [Spirochaeta caldaria DSM 7334]	0	2	1	0	0	0	0	0	0	0	0	0	0	0	0
AEJ20046.1	Spica_1913 [Spirochaeta caldaria DSM 7334]	0	0	1	0	0	0	0	0	0	0	0	0	0	0	0
CBJ55485.1	beta-glucuronidase (C7D2-BG) (3.2.1.31) [uncultured bacterium]	0	0	0	1	0	0	0	0	0	0	0	0	0	0	0
AGC71333.1	beta-mannosidase [uncultured bacterium A1Q1_fos_515]	0	0	0	0	0	0	0	0	0	0	0	0	0	2	0
AHF23796.1	ORF [uncultured bacterium Contig140]	0	2	0	0	0	0	0	0	0	0	0	0	0	0	0
AHF25956.1	ORF [uncultured bacterium Contigcl_1556]	0	1	0	0	0	0	0	0	0	0	0	0	0	0	0
ACQ60179.1	VCD_002010 [Vibrio cholerae MJ-1236]	0	0	0	0	1	0	0	0	0	0	0	0	0	0	0
ABQ20296.1	VC0395_A1917 [Vibrio cholerae O395]	0	0	0	0	1	0	0	0	0	0	0	0	0	0	0
ACH63918.1	VFMJ11_A0129 [Vibrio fischeri MJ11]	0	0	1	0	0	0	0	0	0	0	0	0	0	0	0
AGQ96041.1	M636_01075 [Vibrio parahaemolyticus O1:K33 str. CDC_K4557]	0	0	1	0	0	0	0	0	0	0	0	0	0	2	0
AGQ93110.1	M634_19925 [Vibrio parahaemolyticus O1:Kuk str. FDA_R31]	0	1	0	0	0	0	0	0	0	0	0	0	0	0	0
BAC61700.1	VPA0357 [Vibrio parahaemolyticus RIMD 2210633]	0	0	2	0	0	0	0	0	0	0	0	0	1	0	0
AEX22320.1	VEJY3_09170 [Vibrio sp. EJY3]	0	0	0	0	1	0	0	0	0	0	0	0	0	0	0
AEX24930.1	VEJY3_22596 (LacZ) [Vibrio sp. EJY3]	0	0	0	0	0	0	0	0	0	0	0	0	0	1	0
AAK15465.1	beta-galactosidase (LacZ) (3.2.1.23) [Vibrio vulnificus]	0	0	0	0	0	1	0	0	0	0	0	0	0	0	0
BAC96227.1	VVA0201 [Vibrio vulnificus YJ016]	0	0	1	0	0	0	0	0	0	0	0	0	0	0	0
BAO75152.1	WPG_0922 [Winogradskyella sp. PG-2]	0	0	0	0	2	0	1	1	0	0	0	1	0	1	2
BAO76716.1	WPG_2486 (fragment) [Winogradskyella sp. PG-2]	0	4	0	0	0	0	0	0	0	0	0	0	0	0	0
CAP52410.1	xcc-b100_3047 (Bga3) [Xanthomonas campestris pv. campestris B100]	0	0	0	0	0	0	1	0	0	0	0	0	0	0	0
CDF63518.1	XFF4834R_chr41230 (Lacz1) [Xanthomonas fuscans subsp. fuscans 4834-R]	0	1	0	0	0	0	0	0	0	0	0	0	0	0	0
CAZ95311.1	zobellia_1255 (BgaD) [Zobellia galactanivorans DsiJT]	0	0	1	0	0	0	0	0	0	0	0	0	0	0	0
CAZ95973.1	zobellia_1920 (LacZ) [Zobellia galactanivorans DsiJT]	0	0	1	0	3	0	0	0	0	0	0	0	0	0	0
CAZ97671.1	zobellia_3533 (BgaC) [Zobellia galactanivorans DsiJT]	0	0	0	0	0	0	1	0	0	0	0	0	0	0	0
CAZ96465.1	zobellia_2310 (BgaE) [Zobellia galactanivorans DsiJT]	0	4	0	0	3	0	0	0	0	0	0	0	0	4	0
ADF51258.1	ZPR_0911 [Zunongwangia profunda SM-A87 SMA-87]	0	0	0	0	1	0	0	0	0	0	0	0	0	0	0
ADF51353.1	ZPR_1008 [Zunongwangia profunda SM-A87 SMA-87]	0	0	1	4	0	0	0	0	0	0	0	0	0	0	0
ADF51724.1	ZPR_1388 [Zunongwangia profunda SM-A87 SMA-87]	0	0	1	0	6	0	1	0	0	0	0	0	0	0	0
ADF52815.1	ZPR_2491 [Zunongwangia profunda SM-A87 SMA-87]	0	0	0	0	0	0	1	0	0	0	0	0	0	0	0
ADF53258.1	ZPR_2938 [Zunongwangia profunda SM-A87 SMA-87]	1	2	0	0	0	1	0	0	0	0	0	0	0	0	0
ADF54635.1	ZPR_4333 [Zunongwangia profunda SM-A87 SMA-87]	0	0	0	0	1	0	0	0	0	0	0	0	0	0	0
ADF51876.1	ZPR_1541 [Zunongwangia profunda SM-A87 SMA-87]	0	0	1	1	0	0	0	0	0	0	0	0	0	0	0
Eukaryota		11	15	22	2	32	1	4	7	1	2	0	8	1	17	8
AAM10327.1	At3g54440/T14E10_10 [Arabidopsis thaliana]	0	0	0	0	1	0	0	0	0	0	0	0	0	0	0
EAA62925.1	AN3200 [Aspergillus nidulans FGSC A4]	0	0	0	0	0	0	0	0	0	0	0	1	0	0	0
EAA63395.1	AN2824.2 [Aspergillus nidulans FGSC A4]	11	15	22	0	16	1	2	3	1	2	0	3	1	17	2
CCO19627.1	Bathy14g01370 [Bathycoccus prasinos RCC 1105]	0	0	0	0	1	0	0	0	0	0	0	0	0	0	0
AAM33758.1	dd_03023 [Dictyostelium discoideum AX4]	0	0	0	0	2	0	0	0	0	0	0	0	0	0	0
AAF52172.2	CG12582 [Drosophila melanogaster]	0	0	0	0	0	0	0	1	0	0	0	0	0	0	0
BAD89516.1	ORF [Fusarium sp. IFO 7772]	0	0	0	0	1	0	0	0	0	0	0	0	0	0	0
ABO94678.1	OSTLU_119488 [Ostreococcus lucimarinus CCE9901]	0	0	0	0	1	0	0	0	0	0	0	0	0	0	0
CAL54622.1	Ot07g03490 [Ostreococcus tauri OTTH0595]	0	0	0	1	2	0	1	1	0	0	0	2	0	0	3
CAH90241.1	DKFZp468F187 [Pongo abelii]	0	0	0	0	1	0	0	0	0	0	0	0	0	0	0
AAM33758.1	dd_03023 [Dictyostelium discoideum AX4]	0	0	0	0	2	0	0	0	0	0	0	0	0	0	0
AAF52172.2	CG12582 [Drosophila melanogaster]	0	0	0	0	0	0	0	1	0	0	0	0	0	0	0
BAD89516.1	ORF [Fusarium sp. IFO 7772]	0	0	0	0	1	0	0	0	0	0	0	0	0	0	0
ABO94678.1	OSTLU_119488 [Ostreococcus lucimarinus CCE9901]	0	0	0	0	1	0	0	0	0	0	0	0	0	0	0
CAL54622.1	Ot07g03490 [Ostreococcus tauri OTTH0595]	0	0	0	1	2	0	1	1	0	0	0	2	0	0	3
CAH90241.1	DKFZp468F187 [Pongo abelii]	0	0	0	0	1	0	0	0	0	0	0	0	0	0	0
unclassified		0	0	2	2	0	0	0	0	0	0	0	0	2	0	0
AGU10257.1	ORF [uncultured organism]	0	0	0	1	0	0	0	0	0	0	0	0	0	0	0
AGU11236.1	ORF [uncultured organism]	0	0	1	0	0	0	0	0	0	0	0	0	1	0	0
AGU10257.1	ORF [uncultured organism]	0	0	0	1	0	0	0	0	0	0	0	0	0	0	0
AGU11236.1	ORF [uncultured organism]	0	0	1	0	0	0	0	0	0	0	0	0	1	0	0
GH3		218	1533	400	76	849	43	185	123	101	36	0	86	31	283	150
Archaea		0	3	4	0	2	0	1	0	0	0	0	1	0	2	3
ABW02044.1	Cmaq_1217 [Caldivirga maquilingensis IC-167]	0	0	0	0	0	0	0	0	0	0	0	0	0	1	0
AHB66088.1	HISP_08780 [Haloarcula hispanica N601]	0	2	0	0	0	0	0	0	0	0	0	0	0	0	0
AHZ24265.1	BM92_18860 [Haloferax mediterranei ATCC 33500]	0	0	0	0	1	0	1	0	0	0	0	0	0	0	0
AEH38975.1	Halxa_0372 [Halopiger xanaduensis SH-6]	0	1	0	0	0	0	0	0	0	0	0	0	0	0	0
ACV11546.1	Huta_1370 [Halorhabdus utahensis DSM 12940]	0	0	1	0	0	0	0	0	0	0	0	0	0	1	0
ACV11339.1	Huta_1163 [Halorhabdus utahensis DSM 12940]	0	0	0	0	0	0	0	0	0	0	0	0	0	0	1
ACV11050.1	Huta_0867 [Halorhabdus utahensis DSM 12940]	0	0	1	0	0	0	0	0	0	0	0	0	0	0	0
CAJ35242.1	LRC258 [uncultured methanogenic archaeon RC-I]	0	0	2	0	0	0	0	0	0	0	0	0	0	0	1
BAI61383.1	MCP_1311 [Methanocella paludicola SANAE]	0	0	0	0	0	0	0	0	0	0	0	0	0	0	1
ACP56257.1	M1627_2401 [Sulfolobus islandicus M.16.27]	0	0	0	0	0	0	0	0	0	0	0	1	0	0	0
ACR42924.1	M164_2324 [Sulfolobus islandicus M.16.4]	0	0	0	0	1	0	0	0	0	0	0	0	0	0	0
Bacteria		207	1490	366	67	776	42	157	114	92	33	0	78	23	259	137
CDR30857.1	Aocu_07840 [Acholeplasma oculi]	0	0	0	0	1	0	0	0	0	0	0	0	0	0	0
ACO32886.1	ACP_2415 (BxlB) [Acidobacterium capsulatum ATCC 51196]	0	0	0	0	0	0	0	0	0	0	0	0	0	0	1
ACO33323.1	ACP_1071 (Bxlb1) [Acidobacterium capsulatum ATCC 51196]	0	0	0	0	0	0	0	0	0	1	0	0	0	0	0
ACO33506.1	ACP_0020 [Acidobacterium capsulatum ATCC 51196]	0	0	1	0	0	0	0	0	0	0	0	0	0	0	0
ABM31792.1	Aave_1200 [Acidovorax avenae subsp. citrulli AAC00-1]	1	30	0	0	1	0	0	0	0	0	0	0	0	0	0
AIJ31457.1	ASU1_05970 [Actinobacillus suis ATCC 33415]	0	2	0	0	0	0	0	0	0	0	0	0	0	0	0
AFU19318.1	ASU2_05900 [Actinobacillus suis H91-0380]	0	2	1	0	0	0	0	0	0	0	0	0	0	0	0
AGZ40534.1	AFR_11225 [Actinoplanes friuliensis DSM 7358]	0	0	1	0	0	0	0	0	0	0	0	0	0	0	0
BAL86674.1	AMIS_14540 [Actinoplanes missouriensis 431]	0	0	0	1	0	0	0	0	0	0	0	0	0	0	0
AGL15096.1	L083_1586 [Actinoplanes sp. N902-109]	0	0	0	0	0	0	0	0	0	0	0	1	0	0	0
AGL15656.1	L083_2146 (BglX) [Actinoplanes sp. N902-109]	0	0	1	0	0	0	0	1	0	0	0	0	0	0	0
AGL16264.1	L083_2754 [Actinoplanes sp. N902-109]	0	0	0	0	1	0	0	0	0	0	0	0	0	0	0
AEV82417.1	ACPL_1520 (NagA) [Actinoplanes sp. SE50/110]	0	1	0	0	0	0	0	0	0	0	0	0	0	0	0
AEV83835.1	ACPL_2940 (possible fragment) [Actinoplanes sp. SE50/110]	0	0	0	0	3	0	0	0	0	0	0	0	0	0	0
ACU38445.1	Amir_4612 [Actinosynnema mirum DSM 43827]	0	0	0	0	0	0	0	0	0	1	0	0	0	0	0
ACU38789.1	Amir_4963 [Actinosynnema mirum DSM 43827]	0	2	2	0	0	0	0	1	1	1	0	0	0	0	0
AFL82193.1	Aeqsu_2742 [Aequorivita sublithincola DSM 14238]	10	19	0	0	6	0	3	1	0	1	0	0	0	0	2
AHE49412.1	AH4AK4_1957 [Aeromonas hydrophila 4AK4]	0	0	0	0	2	0	0	0	0	0	0	0	0	0	0
AHX60168.1	B224_1238 [Aeromonas media WS]	0	2	0	0	0	0	0	0	0	0	0	0	0	0	0
ACM30787.1	Arad_9829 (BglsF) [Agrobacterium radiobacter K84]	0	0	1	0	0	0	0	0	0	0	0	0	0	0	0
ACD05918.1	Amuc_2109 [Akkermansia muciniphila ATCC BAA-835]	0	1	0	0	0	0	0	0	0	0	0	0	0	0	0
AFT70100.1	B5T_01825 (NagZ) [Alcanivorax dieselolei B5 B5; MCCC 1A00001]	0	0	1	0	1	0	0	0	0	0	0	0	0	0	0
BAP13934.1	AS19_10830 [Alcanivorax sp. NBRC 101098]	0	0	0	0	1	0	0	0	0	0	0	0	0	0	0
AEJ42419.1	TC41_0453 (BglX) [Alicyclobacillus acidocaldarius subsp. acidocaldarius Tc-4-1]	0	0	2	1	0	0	0	0	0	0	0	0	0	0	0
AFL77430.1	Alfi_1076 [Alistipes finegoldii DSM 17242]	0	0	1	0	0	0	0	0	0	0	0	0	0	0	0
AFL77929.1	Alfi_1590 [Alistipes finegoldii DSM 17242]	0	0	0	0	6	0	0	0	0	0	0	1	0	0	0
CBK62920.1	AL1_02170 [Alistipes shahii WAL 8301]	0	0	1	0	1	0	0	0	0	0	0	0	0	0	0
CBK63831.1	AL1_13770 [Alistipes shahii WAL 8301]	0	0	0	0	1	0	0	0	0	0	0	0	0	0	0
ABI56676.1	Mlg_1327 [Alkalilimnicola ehrlichei MLHE-1]	0	0	0	0	0	0	0	0	0	0	0	0	0	1	0
ADC61447.1	Alvin_0490 [Allochromatium vinosum DSM 180]	0	1	0	0	0	0	0	0	0	0	0	0	0	0	0
AFS47391.1	HIMB5_00006290 [alpha proteobacterium HIMB5]	0	2	0	0	9	0	0	0	0	0	0	0	0	0	1
AIF97677.1	EP13_02645 [Alteromonas australica H 17]	0	0	0	0	1	0	0	0	0	0	0	0	0	0	0
AIG00373.1	EP13_17725 [Alteromonas australica H 17]	0	0	0	0	0	0	0	0	1	0	0	0	0	1	1
AFV87271.1	amad1_18980 [Alteromonas macleodii AltDE1]	0	0	1	0	0	0	0	0	0	0	0	0	0	0	0
AFV87431.1	amad1_19790 [Alteromonas macleodii AltDE1]	1	2	0	0	0	0	0	0	0	0	0	0	0	0	0
AFS39325.1	MASE_19195 [Alteromonas macleodii ATCC 27126]	0	1	0	0	2	0	0	0	0	0	0	0	0	0	0
AGP83521.1	I533_17850 [Alteromonas macleodii str. 'Aegean Sea MED64']	1	1	0	0	0	0	0	0	0	1	0	0	0	1	0
AFT97155.1	AMBAS45_18490 [Alteromonas macleodii str. 'Balearic Sea AD45']	0	0	0	1	1	0	0	0	0	0	0	0	0	1	0
AFT80264.1	AMBLS11_18495 [Alteromonas macleodii str. 'Black Sea 11']	0	1	1	0	2	0	2	0	0	0	0	0	0	0	0
AFT76316.1	AMEC673_18200 [Alteromonas macleodii str. 'English Channel 673']	0	0	1	0	0	0	0	0	0	0	0	0	0	0	0
AGP87353.1	I607_17915 [Alteromonas macleodii str. 'Ionian Sea U4']	0	0	3	0	0	0	0	0	0	0	0	0	0	0	0
AGP91490.1	I876_18290 [Alteromonas macleodii str. 'Ionian Sea U7']	0	1	1	0	0	0	0	1	0	0	0	0	0	0	0
AGP95289.1	I634_18055 [Alteromonas macleodii str. 'Ionian Sea U8']	0	0	1	0	0	0	0	0	2	0	0	0	0	0	0
AGQ03605.1	I636_18930 [Alteromonas macleodii str. 'Ionian Sea UM4b']	0	4	0	0	1	0	0	1	2	0	0	0	0	1	0
AGP99287.1	I635_18970 [Alteromonas macleodii str. 'Ionian Sea UM7']	0	2	0	0	0	0	0	0	0	0	0	0	0	0	0
AGP99447.1	I635_19780 [Alteromonas macleodii str. 'Ionian Sea UM7']	0	1	0	0	1	0	0	0	0	0	0	0	0	1	0
AEF05505.1	ambt_20070 [Alteromonas sp. SN2]	0	1	0	0	0	0	1	0	0	0	0	0	0	1	0
AGA60127.1	BglG204b [Aminobacter sp. Gsoil204]	0	0	0	0	0	0	0	0	0	0	0	0	0	2	0
AIG75932.1	AJAP_15280 [Amycolatopsis japonica MG417-CF17]	0	0	1	0	0	0	0	0	0	0	0	0	0	0	0
AGT87929.1	B737_7268 (BglX) [Amycolatopsis mediterranei RB]	0	0	0	0	1	0	0	0	0	0	0	0	0	0	0
AGT88123.1	B737_7462 [Amycolatopsis mediterranei RB]	0	0	0	0	1	0	2	0	0	0	0	0	0	0	0
AEK39806.1	RAM_06570 [Amycolatopsis mediterranei S699]	0	0	0	0	1	0	0	0	0	0	0	0	0	0	0
AEK39449.1	RAM_04785 [Amycolatopsis mediterranei S699]	0	0	0	0	0	0	0	1	0	0	0	0	0	0	0
ADJ43109.1	AMED_1295 [Amycolatopsis mediterranei U32]	1	0	0	0	0	0	0	0	0	0	0	0	0	0	0
ADJ49093.1	AMED_7379 (BglX) [Amycolatopsis mediterranei U32]	0	2	0	0	0	0	1	0	0	0	0	0	0	0	0
ADJ49287.1	AMED_7574 [Amycolatopsis mediterranei U32]	0	0	1	0	0	0	1	0	0	0	0	0	0	1	0
AIJ23494.1	AMETH_3402 (CelD) [Amycolatopsis methanolica 239]	0	0	1	0	1	0	0	0	0	0	0	0	0	0	0
AGM07442.1	AORI_4858 [Amycolatopsis orientalis HCCB10007]	0	0	1	0	0	0	0	0	0	0	0	0	0	0	1
AFZ59251.1	Anacy_3876 [Anabaena cylindrica PCC 7122]	0	0	0	1	0	0	0	0	0	0	0	0	0	0	0
BAJ63782.1	ANT_17560 [Anaerolinea thermophila UNI-1]	0	0	0	0	3	0	0	0	0	0	0	0	0	0	0
AGR77337.1	A7H1H_1036 [Arcobacter butzleri 7h1h]	1	0	0	0	0	0	0	0	0	0	0	0	0	0	0
BAK70698.1	ABED_0981 [Arcobacter butzleri ED-1]	0	1	0	0	0	0	0	0	1	0	0	0	0	0	0
ABV67295.1	Abu_1035 [Arcobacter butzleri RM4018]	0	1	0	0	0	0	0	0	0	0	0	0	0	0	0
CAI09283.1	ebA5547 (NagZ) [Aromatoleum aromaticum EbN1]	0	1	0	0	0	0	0	0	0	0	0	0	0	0	0
ACL38786.1	Achl_0791 [Arthrobacter chlorophenolicus A6]	1	2	0	0	1	0	1	1	1	0	0	2	1	1	0
ACL40565.1	Achl_2600 [Arthrobacter chlorophenolicus A6]	0	0	1	0	0	0	0	0	0	0	0	0	0	0	0
ADX71897.1	Asphe3_06880 [Arthrobacter phenanthrenivorans Sphe3]	1	15	3	0	0	1	0	0	1	0	0	0	0	0	1
ABK01904.1	Arth_0505 [Arthrobacter sp. FB24]	0	1	0	0	0	0	0	0	0	0	0	0	0	0	0
ABK04527.1	Arth_3149 [Arthrobacter sp. FB24]	0	0	1	0	1	0	0	0	0	0	0	0	0	0	0
AFR28776.1	ARUE_c18700 [Arthrobacter sp. Rue61a]	0	0	1	0	0	0	0	1	0	0	0	0	0	0	0
ADU12894.1	Astex_1219 [Asticcacaulis excentricus CB 48 CS 48]	0	0	0	0	0	0	0	0	0	0	0	0	0	0	1
ADU13025.1	Astex_1355 [Asticcacaulis excentricus CB 48 CS 48]	0	1	0	0	2	0	0	0	0	0	0	0	0	0	0
ADU13610.1	Astex_1947 [Asticcacaulis excentricus CB 48 CS 48]	1	12	2	0	2	0	1	0	0	0	0	1	0	3	0
BAL25132.1	AZKH_2830 [Azoarcus sp. KH32C]	0	0	2	0	1	0	0	0	0	0	0	0	0	0	0
BAF87730.1	AZC_1732 [Azorhizobium caulinodans ORS 571]	0	0	0	0	1	0	0	0	0	0	0	0	0	0	0
AAG43575.1	cellobiase (CelA) (3.2.1.21) [Azospirillum irakense KBC1]	1	2	4	1	2	0	2	0	1	0	0	0	0	0	0
CBS88980.1	AZOLI_p10769 (NagZ) [Azospirillum lipoferum 4B]	0	1	0	0	1	0	0	0	0	0	0	0	0	0	0
BAL45498.1	glycoside hydrolase (Gh3A) [Bacillus licheniformis SVD1]	0	0	0	0	1	0	0	0	0	0	0	0	0	0	0
BAA36161.1	beta-glucosidase B (3.2.1.21) [Bacillus sp. GL1]	0	0	0	0	1	0	0	0	0	0	0	0	0	0	0
CDO61223.1	BN1012_Phect3011 [bacterium Ec32]	0	8	0	0	1	0	0	0	0	0	0	0	0	3	0
AEP84399.1	ORF [bacterium enrichment culture clone g13]	3	3	3	2	3	0	1	1	1	0	0	0	0	2	1
AGX07502.1	BRDCF_02335 [Bacteroides sp. CF50]	0	0	0	0	1	0	0	1	0	0	0	0	1	1	0
AII67260.1	GV66_05835 [Bacteroides dorei HS1_L3_B_079]	0	0	0	0	1	0	0	0	0	0	0	0	0	0	0
AII66331.1	GV66_00745 [Bacteroides dorei HS1_L3_B_079]	2	4	1	0	0	0	0	1	0	0	0	0	0	0	0
AII64703.1	EL88_16755 [Bacteroides dorei HS1_L1_B_010]	0	3	2	0	0	1	0	0	0	0	0	0	0	0	0
AII64988.1	EL88_18355 [Bacteroides dorei HS1_L1_B_010]	0	0	0	0	1	0	0	0	0	0	0	0	0	0	0
AII65974.1	EL88_23725 [Bacteroides dorei HS1_L1_B_010]	0	0	0	0	0	0	0	0	0	0	0	1	0	0	0
CBW20993.1	BF638R_0396 (BglX) [Bacteroides fragilis 638R]	0	0	0	0	0	0	0	0	0	0	0	0	0	0	1
CBW21154.1	BF638R_0563 [Bacteroides fragilis 638R]	0	0	0	0	1	0	0	2	0	2	0	0	0	0	1
CBW21397.1	BF638R_0824 (BglX) [Bacteroides fragilis 638R]	1	0	0	0	0	0	0	0	0	0	0	0	0	0	0
AAB62870.1	beta-glucosidase (3.2.1.21) [Bacteroides fragilis 638R]	0	0	0	0	0	0	0	1	0	0	0	0	0	0	0
CAH06272.1	BF0517 [Bacteroides fragilis NCTC 9343]	0	0	0	0	2	0	1	0	0	0	0	0	0	0	0
CAH06504.1	BF0758 [Bacteroides fragilis NCTC 9343]	0	0	0	0	0	0	1	0	0	0	0	0	0	0	0
BAD51110.1	BF4372 [Bacteroides fragilis YCH46]	0	0	0	0	1	0	0	0	0	0	0	0	0	1	0
BAD47316.1	BF0567 [Bacteroides fragilis YCH46]	0	0	1	0	1	0	0	0	0	0	0	0	0	0	0
ADV43668.1	Bache_1668 [Bacteroides helcogenes P 36-108 ATCC 35417]	0	0	0	0	2	0	0	0	0	0	0	0	0	0	0
ADV42268.1	Bache_0238 [Bacteroides helcogenes P 36-108 ATCC 35417]	0	0	0	0	6	0	2	0	0	0	0	0	0	0	1
ADV42275.1	Bache_0245 [Bacteroides helcogenes P 36-108 ATCC 35417]	0	0	0	0	1	0	0	0	0	0	0	0	0	0	1
ADV42634.1	Bache_0609 [Bacteroides helcogenes P 36-108 ATCC 35417]	0	0	0	0	0	0	1	0	0	0	0	0	0	0	0
ADV43485.1	Bache_1480 [Bacteroides helcogenes P 36-108 ATCC 35417]	0	0	0	0	1	0	0	0	0	0	0	0	0	0	0
ADV43554.1	Bache_R0042 [Bacteroides helcogenes P 36-108 ATCC 35417]	2	0	0	1	1	0	0	0	1	0	0	0	0	2	0
EDV05842.1	(3.2.1.37) [Bacteroides intestinalis DSM 17393]	0	0	1	0	2	0	0	0	0	0	0	0	0	0	0
ZP_02065673.1	beta-glucosidase (BoGH3B;BACOVA_02659) (3.2.1.21) [Bacteroides ovatus ATCC 8483]	0	0	0	0	1	0	0	0	0	0	0	0	0	0	0
ADY35473.1	Bacsa_0881 [Bacteroides salanitronis DSM 18170]	0	0	0	0	3	0	0	0	0	0	0	0	0	0	0
ADY36466.1	Bacsa_1910 [Bacteroides salanitronis DSM 18170]	0	0	0	0	1	0	0	0	0	0	0	0	0	0	0
ADY36649.1	Bacsa_2094 [Bacteroides salanitronis DSM 18170]	0	0	0	0	0	0	0	1	0	0	0	0	0	0	0
ADY37542.1	Bacsa_3013 [Bacteroides salanitronis DSM 18170]	0	0	0	0	0	0	0	0	0	0	0	0	0	1	0
AAO77546.1	BT2439 [Bacteroides thetaiotaomicron VPI-5482]	0	0	0	0	2	0	0	0	0	0	0	0	0	0	0
AAO76979.1	BT1872 [Bacteroides thetaiotaomicron VPI-5482]	0	0	0	0	0	0	0	0	0	0	0	0	0	1	0
AAO76885.1	BT1778 [Bacteroides thetaiotaomicron VPI-5482]	0	0	0	0	2	0	1	0	0	0	0	0	0	0	0
AAO76887.1	BT1780 [Bacteroides thetaiotaomicron VPI-5482]	0	0	0	0	0	0	0	0	1	0	0	0	0	0	0
AAO78673.1	BT3567 [Bacteroides thetaiotaomicron VPI-5482]	0	0	0	0	0	0	0	0	0	0	0	0	0	1	0
AGU13700.1	Bgl4 / BuBGL4 [Bacteroides uniformis ZL1]	0	0	0	0	3	0	1	0	0	0	0	0	0	0	1
AGU13708.1	Bgl12 / BuBGL12 [Bacteroides uniformis ZL1]	0	0	0	0	2	0	0	0	0	0	0	0	0	0	0
AGU13701.1	Bgl5 / BuBGL5 [Bacteroides uniformis ZL1]	0	0	1	0	1	0	0	0	0	0	0	0	0	0	0
ABR37861.1	BVU_0131 [Bacteroides vulgatus ATCC 8482]	3	3	2	0	0	1	0	1	0	0	0	2	0	1	0
ABR37873.1	BVU_0145 [Bacteroides vulgatus ATCC 8482]	0	0	0	0	0	0	0	0	0	0	0	0	0	0	1
ABR38447.1	BVU_0741 [Bacteroides vulgatus ATCC 8482]	0	0	0	0	0	0	0	0	0	0	0	0	0	2	0
CBK67250.1	BXY_21750 [Bacteroides xylanisolvens XB1A]	2	1	0	0	0	0	0	0	0	0	0	1	1	1	0
CBK67251.1	BXY_21760 [Bacteroides xylanisolvens XB1A]	0	0	0	0	3	0	0	0	0	0	0	0	0	0	0
CBK66838.1	BXY_17340 [Bacteroides xylanisolvens XB1A]	0	0	0	0	0	0	0	0	0	0	0	0	0	0	1
CBK67614.1	BXY_25670 [Bacteroides xylanisolvens XB1A]	0	0	0	0	1	0	0	0	0	0	0	0	0	0	0
AHF12784.1	BARVI_08480 [Barnesiella viscericola DSM 18177 C46, DSM 18177]	0	0	0	1	2	0	0	0	0	0	0	1	0	0	0
AHF12789.1	BARVI_08530 [Barnesiella viscericola DSM 18177 C46, DSM 18177]	0	0	0	0	1	0	1	0	0	0	0	0	0	0	0
AHF13300.1	BARVI_11735 [Barnesiella viscericola DSM 18177 C46, DSM 18177]	0	0	0	0	4	0	3	0	0	0	0	0	0	0	0
AHF13457.1	BARVI_12790 [Barnesiella viscericola DSM 18177 C46, DSM 18177]	1	0	0	0	1	0	0	0	0	0	0	0	0	0	1
AHF12163.1	BARVI_04485 (fragment) [Barnesiella viscericola DSM 18177 C46, DSM 18177]	1	0	0	0	0	0	0	0	0	0	0	0	0	0	0
CBI76721.1	BARCL_1040 [Bartonella clarridgeiae 73]	0	0	0	0	1	0	0	0	0	0	0	0	0	0	0
CDP79931.1	BN1046_00836 (fragment) [Bartonella schoenbuchensis MVT06]	0	0	0	0	2	0	0	2	0	0	0	0	0	0	0
CBI81196.1	B11C_150024 [Bartonella sp. 1-1C]	0	0	1	0	0	0	0	0	0	0	0	0	0	0	0
CBI79691.1	BAR15_160035 [Bartonella sp. AR 15-3]	0	0	0	0	1	0	0	0	0	0	0	0	0	0	0
AGH94365.1	A11Q_145 [Bdellovibrio exovorus JSS]	0	0	1	0	0	0	0	0	0	0	0	0	0	0	0
AFL84222.1	Belba_1615 [Belliella baltica DSM 15883]	0	0	0	0	0	0	0	0	0	0	0	0	0	3	0
ACQ82285.1	Bcav_4044 [Beutenbergia cavernae DSM 12333]	0	0	0	0	0	0	0	0	0	0	0	0	0	1	0
ADB08889.1	BDP_0208 [Bifidobacterium dentium Bd1]	0	0	0	1	0	0	0	0	0	0	0	0	0	0	0
ADB10263.1	BDP_1671 (Bgl2) [Bifidobacterium dentium Bd1]	0	0	1	0	0	0	0	0	0	0	0	0	0	0	0
AEI98499.1	BLNIAS_02886 [Bifidobacterium longum subsp. longum KACC 91563]	0	0	0	0	1	0	0	0	0	0	0	0	0	0	0
CCJ53065.1	BN112_1147 (NagZ) [Bordetella bronchiseptica 253]	0	0	4	0	0	0	0	0	0	0	0	0	0	0	0
BAC50019.1	Bll4754 [Bradyrhizobium japonicum USDA 110]	0	6	0	0	0	0	0	0	0	0	0	0	0	0	0
BAM89584.1	S58_35910 [Agromonas oligotrophica S58]	0	5	1	0	0	0	0	0	0	0	0	0	0	0	0
ABQ36459.1	BBta_4420 [Bradyrhizobium sp. BTAi1]	0	0	2	0	0	0	0	0	0	0	0	1	0	0	0
CAL77802.1	BRADO4050 [Bradyrhizobium sp. ORS278]	0	7	0	0	0	0	0	0	0	0	0	0	1	1	0
BAL76612.1	S23_34110 [Bradyrhizobium sp. S23321]	0	11	0	0	0	0	0	1	0	0	0	0	0	0	0
ADL01073.1	Bresu_1762 [Brevundimonas subvibrioides ATCC 15264]	0	0	0	0	1	0	0	0	1	0	0	1	0	0	0
ADL02241.1	Bresu_2935 [Brevundimonas subvibrioides ATCC 15264]	1	6	0	0	0	0	0	0	0	0	0	0	0	0	0
ADL02293.1	Bresu_2987 [Brevundimonas subvibrioides ATCC 15264]	0	7	1	0	0	0	0	0	0	0	0	0	1	0	0
ADG20166.1	BC1002_6309 [Burkholderia sp. CCGE1002]	0	0	0	0	0	0	0	0	0	0	0	0	0	1	0
AIC87621.1	BTRA_1652 [Burkholderia thailandensis USAMRU Malaysia #20]	0	0	1	0	0	0	0	0	0	0	0	0	0	0	0
CBK75766.1	CIY_32960 [Butyrivibrio fibrisolvens 16/4]	0	0	0	0	1	0	0	0	0	0	0	0	0	0	0
ADL32934.1	bpr_I0184 [Butyrivibrio proteoclasticus B316]	0	0	0	0	0	0	0	0	0	0	0	0	0	0	1
ABP66212.1	Csac_0586 [Caldicellulosiruptor saccharolyticus DSM 8903]	0	0	0	0	1	0	0	0	0	0	0	0	0	0	0
ABP66714.1	Csac_1102 [Caldicellulosiruptor saccharolyticus DSM 8903]	0	0	1	0	2	0	0	0	0	0	0	0	0	0	0
ACV34870.1	CAP2UW1_1555 [Candidatus Accumulibacter phosphatis clade IIA str. UW-1]	0	0	1	0	0	0	0	0	0	0	0	0	0	0	0
ACE06729.1	Aasi_1439 [Candidatus Amoebophilus asiaticus 5a2]	0	0	1	0	0	0	0	0	0	0	0	1	0	0	0
AEP12290.1	Cabther_A1540 [Candidatus Chloracidobacterium thermophilum B]	1	10	0	0	0	0	0	0	2	0	0	0	0	0	0
ABF39535.1	Acid345_0530 [Candidatus Koribacter versatilis Ellin345]	0	0	0	0	0	0	0	0	0	0	0	0	0	1	0
AEI88832.1	midi_00527 [Candidatus Midichloria mitochondrii IricVA]	0	1	0	0	0	0	0	0	0	0	0	0	0	0	0
AAZ21780.1	SAR11_0972 [Candidatus Pelagibacter ubique HTCC1062]	0	0	0	0	10	0	3	0	0	0	0	0	0	0	3
ABJ83649.1	Acid_2660 [Solibacter usitatus Ellin6076]	1	0	0	0	1	0	0	0	0	0	0	0	0	0	1
AGX88163.1	Cenrod_2092 [Comamonadaceae bacterium CR]	0	0	0	0	1	0	0	0	0	0	0	0	0	0	0
AGX88538.1	Cenrod_2484 (NagZ) [Comamonadaceae bacterium CR]	0	1	0	0	0	0	0	0	0	0	0	0	0	0	0
AEK23523.1	Ccan_14070 [Capnocytophaga canimorsus Cc5]	0	3	0	0	0	0	0	0	0	0	0	0	0	0	0
AEK23787.1	Ccan_16710 [Capnocytophaga canimorsus Cc5]	5	4	0	1	1	1	1	0	1	0	0	0	0	1	1
ACU92686.1	Coch_1132 [Capnocytophaga ochracea DSM 7271]	0	0	0	0	1	0	0	1	0	0	0	0	1	0	0
ACU92010.1	Coch_0447 [Capnocytophaga ochracea DSM 7271]	0	0	1	0	4	0	0	0	0	0	0	0	0	0	0
ACU93029.1	Coch_1483 [Capnocytophaga ochracea DSM 7271]	2	9	0	0	5	0	0	0	1	0	0	0	0	0	0
ACU92567.1	Coch_1012 [Capnocytophaga ochracea DSM 7271]	0	0	0	0	1	0	0	3	0	0	0	0	0	0	1
CCO12977.1	BN424_3571 (BglB) [Carnobacterium maltaromaticum LMA28]	0	0	0	0	0	0	0	0	0	0	0	0	0	0	1
ACU72743.1	Caci_3845 [Catenulispora acidiphila DSM 44928]	0	0	0	0	1	0	0	0	0	0	0	0	0	0	0
ACU73902.1	Caci_5042 [Catenulispora acidiphila DSM 44928]	0	0	0	0	0	0	0	0	0	0	0	0	0	1	0
AAK24025.1	CC2052 [Caulobacter crescentus CB15]	0	4	1	0	2	0	0	0	0	0	0	0	0	0	0
AAK22782.1	CC0797 / CC_0797 [Caulobacter crescentus CB15]	0	6	2	0	0	0	0	0	0	0	0	0	0	0	0
ACL95596.1	CCNA_02131 (CelD) [Caulobacter crescentus NA1000]	0	2	2	0	0	0	0	0	0	0	0	0	0	0	1
ACL96614.1	CCNA_03149 [Caulobacter crescentus NA1000]	0	0	1	0	0	0	1	0	0	0	0	0	0	0	0
ACL94304.1	CCNA_00839 [Caulobacter crescentus NA1000]	0	8	0	0	0	0	0	2	0	0	0	0	0	0	0
ACL94627.1	CCNA_01162 [Caulobacter crescentus NA1000]	0	0	0	0	0	0	0	0	0	0	0	0	0	1	0
ACL95550.1	CCNA_02085 [Caulobacter crescentus NA1000]	0	2	1	0	0	0	0	0	0	0	0	0	0	0	0
ADG09912.1	Cseg_1422 [Caulobacter segnis ATCC 21756]	0	3	0	0	0	0	0	0	0	0	0	0	0	0	0
ADG10897.1	Cseg_2442 [Caulobacter segnis ATCC 21756]	0	0	1	0	0	0	0	0	0	0	0	0	0	0	0
ADG09734.1	Cseg_1234 [Caulobacter segnis ATCC 21756]	0	0	0	0	0	0	0	0	0	0	0	0	0	0	1
ABZ69289.1	Caul_0152 [Caulobacter sp. K31]	0	6	0	0	0	0	0	0	0	0	0	0	0	1	0
ABZ70433.1	Caul_1303 [Caulobacter sp. K31]	0	3	2	0	1	1	0	0	0	0	0	0	1	1	0
ABZ71531.1	Caul_2404 [Caulobacter sp. K31]	0	0	0	0	0	0	0	0	1	0	0	0	0	0	0
AEE44723.1	Celf_0583 [Cellulomonas fimi ATCC 484]	0	0	0	0	0	0	1	0	0	0	0	0	0	0	0
ADV47809.1	Celal_0470 [Cellulophaga algicola DSM 14237]	0	3	2	0	2	0	1	0	0	1	0	0	0	1	1
ADV49103.1	Celal_1802 [Cellulophaga algicola DSM 14237]	0	0	0	0	0	1	0	0	0	0	0	0	0	0	0
ADV50071.1	Celal_2789 [Cellulophaga algicola DSM 14237]	0	0	0	0	1	0	0	0	0	0	0	0	0	0	0
ADV50389.1	Celal_3115 [Cellulophaga algicola DSM 14237]	7	8	1	0	10	0	1	0	4	0	0	0	0	0	1
ADY28583.1	Celly_0751 [Cellulophaga lytica DSM 7489]	0	0	0	0	2	0	0	0	0	0	0	0	0	0	1
ADY30424.1	Celly_2607 [Cellulophaga lytica DSM 7489]	1	18	1	3	6	1	1	0	1	0	0	0	0	0	0
ADY31066.1	Celly_3249 [Cellulophaga lytica DSM 7489]	0	0	0	0	2	0	2	0	0	0	0	2	0	1	2
ACE84847.1	(3.2.1.74) [Cellvibrio japonicus Ueda107]	1	0	1	0	0	0	1	1	0	0	0	0	0	1	0
ACE82897.1	[Cellvibrio japonicus Ueda107]	4	10	2	0	0	0	1	0	1	0	0	1	0	0	0
ACE83024.1	(3.2.1.21) [Cellvibrio japonicus Ueda107]	0	3	0	0	0	0	0	1	0	0	0	0	0	0	0
ACE85841.1	[Cellvibrio japonicus Ueda107]	0	5	1	0	1	0	0	2	0	0	0	1	0	1	0
AHJ25676.1	beta-glucosidase [Cellvibrio sp. J3-8]	1	3	2	1	2	0	1	0	1	0	0	0	0	3	0
ABG63204.1	Meso_1810 [Mesorhizobium sp. BNC1]	0	0	0	0	1	0	0	0	0	0	0	0	0	1	0
ACU58337.1	Cpin_0839 [Chitinophaga pinensis DSM 2588]	0	0	1	1	1	0	0	0	0	0	0	0	0	0	0
ACU59312.1	Cpin_1816 [Chitinophaga pinensis DSM 2588]	0	0	0	0	2	0	0	0	0	0	0	0	0	0	0
ABB23015.1	Plut_0125 [Pelodictyon luteolum DSM 273]	0	0	0	0	1	0	0	0	0	0	0	0	0	0	1
ABP36215.1	Cvib_0192 [Prosthecochloris vibrioformis DSM 265]	0	1	0	0	0	0	0	0	0	0	0	0	0	0	0
ACM52596.1	Chy400_1175 [Chloroflexus sp. Y-400-fl]	0	0	0	0	1	0	0	0	0	0	0	0	0	0	0
ACF12716.1	Ctha_0245 [Chloroherpeton thalassium ATCC 35110]	0	0	0	0	0	1	0	0	0	0	0	0	0	0	0
BAP32214.1	CHSO_3177 [Chryseobacterium sp. StRB126]	0	0	0	0	1	0	0	0	0	0	0	0	0	0	0
BAP32333.1	CHSO_3296 [Chryseobacterium sp. StRB126]	0	0	0	0	1	0	0	0	0	0	0	0	0	0	0
CAN00117.1	CMM_0097 [Clavibacter michiganensis subsp. michiganensis NCPPB 382]	0	1	0	0	0	0	0	0	0	0	0	0	0	0	0
ADZ20124.1	CEA_G1086 [Clostridium acetobutylicum EA 2018]	0	0	0	0	1	0	0	0	0	0	0	0	0	0	0
CDZ23220.1	CCDG5_0070 [[Clostridium] cellulosi]	0	0	0	0	1	0	0	0	0	0	0	0	0	0	0
AEV68638.1	Clocl_2040 [Clostridium clariflavum DSM 19732]	0	0	1	0	0	0	1	0	0	0	0	0	0	0	0
AGF58064.1	Cspa_c43110 (Bglx1) [Clostridium saccharoperbutylacetonicum N1-4(HMT)]	0	0	0	0	2	0	0	0	0	0	0	0	0	0	2
AEY64503.1	Clo1100_0214 [Clostridium sp. BNL1100]	0	0	0	0	2	0	0	0	0	0	0	0	0	0	0
ZP_02867814.1	ZP_02867814.1 [Clostridium spiroforme DSM 1552]	0	0	0	0	0	0	0	0	0	0	0	0	0	1	0
CAB08072.1	(3.2.1.21) [Clostridium stercorarium NCIMB 11754]	0	0	1	0	1	0	0	0	0	0	0	0	0	1	0
AGI38341.1	Cst_c02510 (BxlB) [Clostridium stercorarium subsp. stercorarium DSM 8532]	0	0	1	0	1	0	0	0	0	0	0	0	0	0	0
AGC67337.1	Cst_c03130 (BglZ) [Clostridium stercorarium subsp. stercorarium DSM 8532]	0	0	0	0	0	0	0	0	0	0	0	1	0	0	0
AAZ26105.1	CPS_3740 [Colwellia psychrerythraea 34H BAA-681]	0	0	1	0	2	0	0	0	0	0	0	0	0	0	0
AAZ26371.1	CPS_4609 (NagZ2) [Colwellia psychrerythraea 34H BAA-681]	0	0	0	0	1	0	0	0	0	0	0	0	0	0	0
AAZ27098.1	CPS_2379 [Colwellia psychrerythraea 34H BAA-681]	0	0	0	1	0	0	0	0	0	0	0	0	0	0	0
AAZ27659.1	CPS_3725 [Colwellia psychrerythraea 34H BAA-681]	0	0	0	0	1	0	0	0	0	0	0	0	0	0	0
AAZ28816.1	CPS_3739 [Colwellia psychrerythraea 34H BAA-681]	0	4	0	0	0	0	0	0	0	0	0	0	0	1	0
AAZ28827.1	CPS_3692 [Colwellia psychrerythraea 34H BAA-681]	0	0	0	0	1	0	0	0	0	0	0	0	0	0	0
AAZ28832.1	CPS_2365 [Colwellia psychrerythraea 34H BAA-681]	0	0	0	0	1	0	0	0	0	0	0	0	0	0	0
BAO81559.1	SRAA_1705 [Comamonadaceae bacterium A1]	0	2	0	0	0	0	0	0	0	0	0	0	0	0	0
ACJ18300.1	CbuG_0926 (NagZ) [Coxiella burnetii CbuG_Q212]	0	0	1	0	0	0	0	0	0	0	0	0	0	1	0
ACJ20163.1	CbuK_0943 (NagZ) [Coxiella burnetii CbuK_Q154]	0	0	1	0	0	0	0	0	1	0	0	0	0	0	0
ABS77872.1	COXBU7E912_1179 [Coxiella burnetii Dugway 5J108-111]	0	0	1	0	0	0	0	0	0	0	0	0	0	0	0
ABX78792.1	COXBURSA331_A0853 (NagZ) [Coxiella burnetii RSA 331]	0	0	2	0	0	0	0	1	0	0	0	0	0	0	0
AAO90590.1	CBU1077 (NagZ) [Coxiella burnetii RSA 493]	0	0	3	0	0	0	0	0	0	0	0	0	0	1	0
EAP86568.1	CA2559_11048 [Croceibacter atlanticus HTCC2559]	5	26	0	1	11	1	2	0	1	0	0	0	0	3	0
AEL26735.1	Cycma_3007 [Cyclobacterium marinum DSM 745]	0	0	0	0	0	0	1	0	0	0	0	0	0	0	0
AEL26248.1	Cycma_2509 [Cyclobacterium marinum DSM 745]	0	1	0	0	1	0	0	2	0	0	0	0	0	0	0
ABG57307.1	CHU_0013 [Cytophaga hutchinsonii ATCC 33406]	0	0	1	1	0	0	1	0	0	0	0	0	0	0	1
ABG60810.1	CHU_3577 [Cytophaga hutchinsonii ATCC 33406]	0	0	0	0	0	0	1	0	0	0	0	0	0	0	1
ABG59531.1	CHU_2268 [Cytophaga hutchinsonii ATCC 33406]	0	0	0	0	0	0	0	0	0	0	0	1	0	0	1
ABG59535.1	CHU_2273 [Cytophaga hutchinsonii ATCC 33406]	0	0	0	0	1	0	0	0	0	0	0	0	0	0	0
AEV26823.1	Dsui_2465 [Dechlorosoma suillum PS]	0	0	0	0	1	0	0	0	0	0	0	0	0	0	0
AAF10903.1	DR1333 / DR_1333 [Deinococcus radiodurans R1]	0	0	0	0	1	0	0	0	0	0	0	0	0	0	0
ABX37885.1	Daci_5256 [Delftia acidovorans SPH-1]	0	0	0	0	1	0	0	0	0	0	0	0	0	0	0
AEF88391.1	DelCs14_1359 [Delftia sp. Cs1-4]	0	0	0	0	0	0	0	1	0	0	0	0	0	0	0
ACL05672.1	Dalk_3986 [Desulfatibacillum alkenivorans AK-01]	0	0	0	0	0	0	0	0	0	0	0	0	1	0	0
CCK80666.1	TOL2_C25050 (NagZ) (possible fragment) [Desulfobacula toluolica Tol2]	0	0	0	0	0	0	0	0	0	0	0	0	0	0	1
AFM25307.1	Desti_2627 [Desulfomonile tiedjei DSM 6799]	0	2	0	0	0	0	0	0	0	0	0	0	0	0	0
AFQ44327.1	Desmer_2404 [Desulfosporosinus meridiei DSM 13257]	0	0	0	0	0	0	0	0	0	1	0	0	0	0	0
ADU63670.1	Daes_2674 [Desulfovibrio aespoeensis Aspo-2]	0	3	0	0	0	0	0	0	0	0	0	0	0	0	0
EGB16456.1	DND132_3253 [Desulfovibrio desulfuricans ND132]	0	0	0	0	0	0	0	0	0	0	0	0	0	1	0
ADM98002.1	Dda3937_03745 (BgxA) [Dickeya dadantii 3937]	0	0	0	0	2	0	0	0	0	0	0	0	0	0	0
ACK42995.1	Dtur_1723 [Dictyoglomus turgidum DSM 6724]	1	0	0	0	0	0	0	1	0	0	0	0	0	1	0
ACK41548.1	beta-glucosidase / beta-glycosidase (Dtur_0219) (3.2.1.21) [Dictyoglomus turgidum DSM 6724]	0	0	0	0	0	0	0	0	0	1	0	0	0	0	0
ACK41612.1	Dtur_0289 [Dictyoglomus turgidum DSM 6724]	0	0	0	0	0	0	0	0	0	0	0	0	0	0	1
ABV93468.1	Dshi_1726 [Dinoroseobacter shibae DFL 12]	0	3	0	0	0	0	1	1	0	0	0	1	0	1	1
AEE18062.1	Krodi_0071 [Krokinobacter sp. 4H-3-7-5]	3	21	0	0	7	1	2	0	1	2	0	0	0	1	1
AHW59388.1	FH5T_06650 [Draconibacterium orientale FH5T]	0	0	0	0	0	0	0	0	0	0	0	0	0	0	1
AHW60888.1	FH5T_18010 [Draconibacterium orientale FH5T]	0	0	0	0	3	0	0	0	0	0	0	0	0	1	0
AHW61098.1	FH5T_19670 [Draconibacterium orientale FH5T]	0	0	0	0	2	0	1	0	0	0	0	0	0	0	0
AHW58614.1	FH5T_00900 [Draconibacterium orientale FH5T]	0	0	0	0	1	0	0	0	0	0	0	0	0	0	0
AHW59269.1	FH5T_05740 [Draconibacterium orientale FH5T]	0	0	0	0	0	0	1	0	0	0	0	0	0	0	0
AHW58808.1	FH5T_02290 [Draconibacterium orientale FH5T]	0	0	0	0	1	0	0	0	0	0	0	0	0	0	0
ACT93924.1	Dfer_2708 [Dyadobacter fermentans DSM 18053]	0	0	0	0	3	0	0	0	0	0	0	0	0	0	0
ACT95409.1	Dfer_4206 [Dyadobacter fermentans DSM 18053]	0	0	0	0	2	0	1	0	0	0	0	1	0	0	0
AIF46621.1	HY57_04750 [Dyella japonica A8]	0	9	0	0	2	0	0	0	0	0	0	0	0	0	0
AIF48111.1	HY57_12995 [Dyella japonica A8]	0	0	0	0	0	0	1	0	0	0	0	0	0	0	0
AIF48343.1	HY57_14355 [Dyella japonica A8]	0	1	0	0	0	0	0	0	0	0	0	0	0	0	0
AHX13096.1	CH75_07485 [Dyella jiangningensis SBZ 3-12]	0	1	4	1	0	0	0	0	0	0	0	0	0	2	0
AHX15138.1	CH75_19395 [Dyella jiangningensis SBZ 3-12]	0	0	0	0	1	0	0	0	0	0	0	0	0	0	0
AGA77053.1	Echvi_0778 [Echinicola vietnamensis DSM 17526]	0	1	0	0	4	0	0	0	0	0	0	0	0	0	0
AGA78290.1	Echvi_2038 [Echinicola vietnamensis DSM 17526]	0	0	0	0	2	0	0	0	0	0	0	0	0	0	0
AGA78738.1	Echvi_2491 [Echinicola vietnamensis DSM 17526]	0	1	0	0	0	0	0	0	0	0	0	0	0	0	0
AGA76686.1	Echvi_0398 [Echinicola vietnamensis DSM 17526]	0	0	0	0	0	0	1	0	0	0	0	0	0	0	0
AGH72153.1	ETAC_00100 [Edwardsiella tarda C07-087]	0	0	0	0	1	0	0	0	0	0	0	0	0	0	0
AIJ08253.1	ETEE_1806 [Edwardsiella tarda 080813]	0	0	0	0	1	0	1	0	0	0	0	0	0	0	0
ACY84725.1	ETAE_1888 (NagZ) [Edwardsiella tarda EIB202]	0	0	0	0	0	0	0	0	0	0	0	0	0	1	0
ACY82867.1	ETAE_0020 [Edwardsiella tarda EIB202]	0	0	0	0	1	0	0	0	0	0	0	0	0	0	1
AIL44905.1	BD94_1130 [Elizabethkingia anophelis NUHP1]	0	0	0	0	1	0	0	0	0	0	0	0	0	0	0
AIL46915.1	BD94_3140 [Elizabethkingia anophelis NUHP1]	1	0	0	0	0	0	0	0	0	0	0	0	0	2	0
AIL47119.1	BD94_3344 [Elizabethkingia anophelis NUHP1]	0	1	0	0	0	0	0	0	0	0	0	0	0	0	0
AAB66561.1	beta-glucosidase (Bgl) (3.2.1.21) [Elizabethkingia meningoseptica]	1	0	1	0	0	0	0	0	0	0	0	0	0	0	0
AFK02523.1	Emtol_1374 [Emticicia oligotrophica DSM 17448]	0	0	0	0	1	0	0	0	0	0	0	0	0	0	0
AFK02707.1	Emtol_1561 [Emticicia oligotrophica DSM 17448]	0	0	0	0	1	0	0	0	0	0	0	0	0	0	1
AIF81610.1	I862_05280 [endosymbiont of Acanthamoeba sp. UWC8]	0	1	0	0	0	0	0	0	0	0	0	0	0	0	0
AHJ74265.1	C813_05515 [Enterobacter sacchari SP1]	0	0	1	0	0	0	0	0	0	0	0	0	0	0	0
ABC62408.1	ELI_01580 [Erythrobacter litoralis HTCC2594]	0	5	1	0	1	0	0	0	1	0	0	0	0	0	0
CAQ89336.1	EFER_1821 (NagZ) [Escherichia fergusonii ATCC 35469T]	0	0	0	0	0	0	0	0	0	0	0	0	0	1	0
ADO36019.1	ELI_1031 [Eubacterium limosum KIST612]	0	0	0	0	0	0	0	0	0	0	0	1	0	0	0
CBK91095.1	EUR_20760 [Eubacterium rectale DSM 17629]	0	0	0	0	0	0	0	0	0	0	0	0	0	1	0
CBK90758.1	EUR_17040 [Eubacterium rectale DSM 17629]	0	0	0	0	1	0	0	0	0	0	0	0	0	0	0
CBL34954.1	ES1_20860 [Eubacterium siraeum V10Sc8a]	0	0	0	0	1	0	0	0	0	0	0	0	0	0	0
CBK98877.1	FP2_13740 [Faecalibacterium prausnitzii L2-6 L2/6]	0	0	1	0	0	0	0	0	0	0	0	1	0	0	0
ADN76718.1	Fbal_2516 [Ferrimonas balearica DSM 9799]	0	2	0	0	0	0	0	1	0	0	0	0	0	0	0
AFY97405.1	(3.2.1.21) [Fervidobacterium gondwanense AB39]	0	0	0	0	3	0	0	0	0	0	0	0	0	0	0
ABS61441.1	Fnod_1599 [Fervidobacterium nodosum Rt17-B1]	0	0	0	0	1	0	0	0	0	0	0	0	1	0	0
CCG98875.1	FAES_0864 [Fibrella aestuarina BUZ 2]	0	0	0	0	0	0	0	0	0	0	0	0	0	1	0
CCH00262.1	FAES_2253 [Fibrella aestuarina BUZ 2]	0	0	1	0	1	0	0	0	0	0	0	0	0	2	1
ACX75574.1	Fisuc_1985 / FSU_2508 [Fibrobacter succinogenes subsp. succinogenes S85]	0	0	0	0	0	0	0	1	0	0	0	0	0	0	0
ACX75652.1	Fisuc_2065 / FSU_2592 [Fibrobacter succinogenes subsp. succinogenes S85]	0	0	0	0	3	0	0	0	0	0	0	0	0	0	0
AIE87145.1	OP10G_3777 [Fimbriimonas ginsengisoli Gsoil 348]	0	0	0	0	1	0	0	0	0	0	0	0	0	0	0
ACU06687.1	FIC_00213 [Flavobacteriaceae bacterium 3519-10]	0	0	0	0	1	0	0	0	0	0	0	0	0	0	0
CCB69099.1	FBFL15_1000 (BgL) [Flavobacterium branchiophilum FL-15]	0	0	1	0	1	0	0	0	0	0	0	0	0	0	0
CCB69242.1	FBFL15_1154 [Flavobacterium branchiophilum FL-15]	1	1	0	0	4	0	0	0	0	0	0	0	0	0	0
CCB69402.1	FBFL15_1325 [Flavobacterium branchiophilum FL-15]	0	0	0	0	2	0	0	0	0	0	0	0	0	0	0
AEW86245.1	FCOL_07130 [Flavobacterium columnare ATCC 49512]	0	1	0	0	4	0	2	0	0	0	0	0	0	0	0
CCG53382.1	KQS_07120 [Flavobacterium indicum GPTSA100-9]	3	4	2	0	0	0	0	0	0	0	0	0	0	0	0
ABQ03809.1	beta-glucosidase (BglF3;Fjoh_0775) (3.2.1.21) [Flavobacterium johnsoniae UW101]	0	0	0	0	1	0	0	0	0	0	0	0	0	0	0
ABQ04596.1	Fjoh_1564 [Flavobacterium johnsoniae UW101]	0	0	0	1	0	0	0	0	0	0	0	0	0	0	0
ABQ04599.1	Fjoh_1567 [Flavobacterium johnsoniae UW101]	0	0	0	0	0	0	1	0	0	0	0	0	0	0	0
ABQ06403.1	Fjoh_3389 [Flavobacterium johnsoniae UW101]	0	0	0	2	3	0	0	0	0	0	0	0	0	0	0
ABQ06535.1	Fjoh_3521 [Flavobacterium johnsoniae UW101]	0	0	1	0	0	0	0	0	0	0	0	0	0	0	0
ABQ06872.1	Fjoh_3861 [Flavobacterium johnsoniae UW101]	0	1	2	2	5	0	1	0	1	0	0	0	0	0	2
ABQ06885.1	Fjoh_3874 [Flavobacterium johnsoniae UW101]	0	0	0	0	2	0	0	0	0	0	0	0	0	0	0
ABQ06894.1	Fjoh_3883 [Flavobacterium johnsoniae UW101]	0	0	0	0	0	0	0	0	0	0	0	0	0	1	0
ABQ07818.1	Fjoh_4819 [Flavobacterium johnsoniae UW101]	0	0	0	0	3	0	2	0	0	0	0	0	0	0	1
ABQ07962.1	Fjoh_4963 [Flavobacterium johnsoniae UW101]	0	1	2	0	9	0	3	1	0	0	0	0	0	0	2
AIG31929.1	IA01_03815 [Flavobacterium psychrophilum V1-20]	1	1	0	0	1	0	0	0	0	0	0	0	0	0	1
AIG34083.1	IA02_03205 [Flavobacterium psychrophilum V2-20]	0	0	0	1	3	0	0	0	0	0	0	0	0	0	0
AIG29652.1	IA03_03800 [Flavobacterium psychrophilum V3-5]	0	2	0	0	1	0	0	0	0	0	0	0	1	0	0
AIG36447.1	IA04_03715 [Flavobacterium psychrophilum V4-24]	0	0	0	0	0	0	0	0	0	0	0	0	0	0	3
AIG38712.1	IA05_03800 [Flavobacterium psychrophilum V4-28]	0	0	0	0	3	0	1	0	0	0	0	0	0	0	0
AFM03766.1	Fleli_1334 [Flexibacter litoralis DSM 6794]	0	0	0	0	1	0	0	0	0	0	0	0	0	1	0
AEI13913.1	Flexsi_0221 [Flexistipes sinusarabici DSM 4947]	0	0	1	0	0	0	0	0	0	0	0	0	0	0	0
AEA45500.1	Fluta_3531 [Fluviicola taffensis DSM 16823]	0	0	0	0	2	0	0	0	0	0	0	1	0	0	0
CDF78704.1	BN863_9920 [Formosa agariphila KMM 3901 type strain: KMM 3901]	0	4	3	0	0	0	1	0	0	0	0	0	0	3	0
CDF78742.1	BN863_10300 [Formosa agariphila KMM 3901 type strain: KMM 3901]	0	0	0	0	1	0	0	0	0	0	0	0	0	0	0
CDF79408.1	BN863_16960 [Formosa agariphila KMM 3901 type strain: KMM 3901]	6	10	3	0	8	0	2	0	0	0	0	0	0	1	0
CDF79690.1	BN863_19780 [Formosa agariphila KMM 3901 type strain: KMM 3901]	0	1	0	0	4	0	2	0	0	0	0	0	0	0	1
CDF79925.1	BN863_22130 [Formosa agariphila KMM 3901 type strain: KMM 3901]	0	0	1	0	0	0	0	0	0	0	0	0	0	0	0
CDF79935.1	BN863_22230 [Formosa agariphila KMM 3901 type strain: KMM 3901]	0	0	0	2	2	0	0	0	0	0	0	0	0	0	1
ABW12695.1	Franean1_3292 [Frankia sp. EAN1pec]	0	0	0	0	1	0	0	0	0	0	0	0	0	0	0
AFC86099.1	Fraau_1688 [Frateuria aurantia DSM 6220]	0	0	0	0	0	0	0	0	0	0	0	0	0	1	0
ADL55225.1	Galf_1197 [Gallionella capsiferriformans ES-2]	0	0	0	0	0	0	0	0	0	0	0	0	0	2	0
CBL44873.1	HDN1F_12900 (HexC) [gamma proteobacterium HdN1]	0	0	0	0	0	0	0	0	0	0	0	0	0	1	0
BAO44066.1	TBH_C1138 [gamma proteobacterium Hiromi1]	0	0	0	0	0	0	0	0	0	0	0	0	0	1	0
AHG88100.1	J421_0563 [Gemmatimonadetes bacterium KBS708]	0	0	0	0	2	0	0	0	0	0	0	0	0	0	0
AHG89211.1	J421_1674 [Gemmatimonadetes bacterium KBS708]	1	0	0	0	0	0	0	0	0	0	0	0	0	0	0
AHG92050.1	J421_4513 [Gemmatimonadetes bacterium KBS708]	0	0	1	0	0	0	0	0	0	0	0	0	0	0	0
AHG93415.1	J421_5880 [Gemmatimonadetes bacterium KBS708]	0	0	0	0	0	0	0	0	0	0	0	0	0	1	0
AGE23865.1	GHH_c33750 (BglX) [Geobacillus sp. GHH01]	0	0	0	0	1	0	0	0	0	0	0	0	0	0	0
AEH48362.1	Geoth_2450 [Geobacillus thermoglucosidasius C56-YS93]	0	1	0	0	0	0	0	0	0	0	0	0	0	0	0
AHN26550.1	GAPWK_1977 [Gilliamella apicola wkB30]	0	2	0	0	0	0	0	0	0	0	0	0	0	0	0
AEE23554.1	Glaag_2613 [Glaciecola agarilytica 4H-3-7+YE-5]	0	0	1	0	0	0	0	0	0	0	0	0	0	0	0
AEE24650.1	Glaag_3721 [Glaciecola agarilytica 4H-3-7+YE-5]	0	2	0	0	1	0	0	0	0	0	0	0	0	0	0
AEE24655.1	Glaag_3726 [Glaciecola agarilytica 4H-3-7+YE-5]	1	0	0	0	1	0	0	0	0	0	0	0	0	0	1
AEP29790.1	GNIT_1674 (NagZ) [Glaciecola nitratireducens FR1064]	0	0	0	0	0	0	0	0	0	0	0	1	0	0	0
AEP31311.1	GNIT_3217 (BglX) [Glaciecola nitratireducens FR1064]	0	1	0	0	0	0	0	0	0	0	0	0	0	0	0
AEP31378.1	GNIT_3284 [Glaciecola nitratireducens FR1064]	0	0	0	0	1	0	0	0	0	0	0	0	0	0	0
AGH43510.1	C427_1401 (fragment) [Glaciecola psychrophila 170]	0	0	0	0	1	0	0	0	0	0	0	0	0	0	0
AGH45230.1	C427_3121 [Glaciecola psychrophila 170]	0	0	2	0	0	0	0	0	1	0	0	0	0	0	0
AGH45503.1	C427_3394 [Glaciecola psychrophila 170]	0	0	1	0	1	0	0	0	0	0	0	0	0	0	0
AGH46402.1	C427_4300 [Glaciecola psychrophila 170]	0	0	0	0	0	0	0	0	0	0	0	0	0	0	1
AGH46428.1	C427_4326 [Glaciecola psychrophila 170]	0	0	0	1	0	0	0	0	0	0	0	0	0	1	0
AGH43223.1	C427_1114 [Glaciecola psychrophila 170]	0	0	0	0	2	0	0	0	0	0	0	0	0	0	0
AGH45505.1	C427_3396 (fragment) [Glaciecola psychrophila 170]	0	0	0	0	0	0	0	0	0	0	0	0	0	0	1
CAL66607.1	orf1621 [Gramella forsetii KT0803]	2	8	1	0	8	1	2	1	2	0	0	0	1	0	1
CAL68406.1	orf3423 [Gramella forsetii KT0803]	0	1	0	0	1	0	0	2	0	0	0	0	0	1	0
ABI62156.1	GbCGDNIH1_1258 [Granulibacter bethesdensis CGDNIH1]	0	0	1	0	0	0	0	0	0	0	0	0	0	0	0
AHJ66305.1	GbCGDNIH4_1258 [Granulibacter bethesdensis CGDNIH4]	0	4	0	0	0	0	0	0	0	0	0	0	0	0	0
AEU36000.1	AciX8_1661 [Granulicella mallensis MP5ACTX8]	0	0	0	0	1	0	0	0	0	0	0	0	0	0	0
AEU36797.1	AciX8_2482 [Granulicella mallensis MP5ACTX8]	0	0	0	0	0	0	0	0	0	1	0	0	0	0	0
AEU39110.1	AciX8_4841 [Granulicella mallensis MP5ACTX8]	0	2	0	0	0	0	0	0	0	0	0	0	0	0	0
ABC33448.1	HCH_06825 [Hahella chejuensis KCTC 2396]	0	3	2	0	2	0	0	0	0	0	0	0	0	2	0
ADO76261.1	Hprae_0103 [Halanaerobium praevalens DSM 2228]	0	0	0	0	1	0	0	0	0	0	0	0	0	0	0
ACY13810.1	Hoch_1250 [Haliangium ochraceum DSM 14365]	0	1	1	0	1	0	0	0	0	0	0	0	0	1	0
ACY14617.1	Hoch_2072 [Haliangium ochraceum DSM 14365]	1	3	1	0	2	0	0	0	0	0	0	0	0	0	0
AEE50254.1	Halhy_2378 [Haliscomenobacter hydrossis DSM 1100]	0	0	1	2	0	0	0	1	0	0	0	1	0	1	1
AEE53244.1	Halhy_5419 [Haliscomenobacter hydrossis DSM 1100]	0	0	1	0	1	0	0	0	0	0	0	0	0	0	0
AEE54288.1	Halhy_6472 [Haliscomenobacter hydrossis DSM 1100]	0	0	0	0	0	0	0	0	0	0	0	0	0	0	1
CCG44816.1	HBHAL_2473 (YbbC) [Halobacillus halophilus DSM 2266 type strain: DSM 2266]	3	4	5	0	9	0	2	4	2	1	0	1	0	6	4
CCG47207.1	HBHAL_4869 (YbbD) [Halobacillus halophilus DSM 2266 type strain: DSM 2266]	0	0	0	0	1	0	0	0	0	0	0	0	1	0	0
CBV42593.1	HELO_2709 (NagZ) [Halomonas elongata DSM 2581 type strain: DSM 2581]	0	0	1	0	0	0	0	0	0	0	0	0	0	1	0
ACL70728.1	Hore_19810 [Halothermothrix orenii H 168 H 168; DSM 9562]	0	0	2	0	1	0	0	0	0	0	0	0	0	0	0
ACL69176.1	Hore_04180 [Halothermothrix orenii H 168 H 168; DSM 9562]	0	0	0	0	2	0	1	0	0	0	0	0	0	0	0
ACX96232.1	Hneap_1398 [Halothiobacillus neapolitanus c2]	0	0	2	0	0	0	0	0	0	0	0	0	0	0	0
ADJ66244.1	Hsero_4783 [Herbaspirillum seropedicae SmR1]	0	0	0	0	1	0	0	0	0	0	0	0	0	0	0
ABX06099.1	Haur_3463 [Herpetosiphon aurantiacus ATCC 23779]	0	0	0	0	0	0	0	0	0	0	0	0	0	1	0
ACT57911.1	Hbal_0209 [Hirschia baltica ATCC 49814 ATCC 59814]	0	14	0	2	1	0	0	0	0	0	0	0	0	1	0
ACT59085.1	Hbal_1394 [Hirschia baltica ATCC 49814 ATCC 59814]	0	25	1	0	0	0	0	0	1	0	0	1	1	4	0
ACT60136.1	Hbal_2457 [Hirschia baltica ATCC 49814 ATCC 59814]	1	8	1	1	4	0	1	0	1	0	0	1	0	0	0
ACT60746.1	Hbal_3078 [Hirschia baltica ATCC 49814 ATCC 59814]	0	2	0	0	0	0	0	0	0	0	0	0	0	0	0
ACT60137.1	Hbal_2458 [Hirschia baltica ATCC 49814 ATCC 59814]	0	0	0	0	0	0	1	0	0	0	0	0	0	0	1
AII51100.1	N008_03765 [Hymenobacter sp. APR13]	0	0	1	0	0	0	1	0	0	0	0	1	0	0	1
AII52227.1	N008_09585 [Hymenobacter sp. APR13]	2	1	0	0	0	0	0	0	0	0	0	0	0	0	0
AII53090.1	N008_14030 [Hymenobacter sp. APR13]	0	0	1	0	0	0	0	0	0	0	0	0	0	0	0
AHJ96446.1	Hsw_0851 [Hymenobacter swuensis DY53]	0	0	1	0	0	0	0	0	1	1	0	0	0	0	0
AHJ98428.1	Hsw_2833 [Hymenobacter swuensis DY53]	0	0	1	0	2	0	0	0	0	0	0	0	0	1	1
AHJ99528.1	Hsw_3933 [Hymenobacter swuensis DY53]	0	0	0	0	2	0	0	0	0	0	0	0	0	0	1
AHJ96630.1	Hsw_1035 [Hymenobacter swuensis DY53]	0	0	0	0	1	0	0	1	0	0	0	0	0	1	0
AHB48578.1	W911_09560 [Hyphomicrobium nitrativorans NL23]	0	5	0	0	0	0	0	0	1	0	0	0	0	0	0
CCB65908.1	HYPMC_2691 [Hyphomicrobium sp. MC1]	0	2	0	0	0	0	0	0	0	0	0	0	0	0	0
ABI75720.1	HNE_2048 [Hyphomonas neptunium ATCC 15444]	0	6	0	0	0	0	0	0	0	0	0	0	0	0	0
AFH50282.1	IALB_2579 (BglX) [Ignavibacterium album JCM 16511]	0	0	1	0	2	0	0	1	0	0	0	0	0	1	0
AFH50297.1	IALB_2594 (BglX) [Ignavibacterium album JCM 16511]	0	0	0	0	1	0	0	0	0	0	0	0	0	0	0
ABD54426.1	Jann_1509 [Jannaschia sp. CCS1]	0	2	0	0	1	0	0	0	0	0	0	1	0	0	0
CDG81011.1	GJA_350 [Janthinobacterium agaricidamnosum NBRC 102515 = DSM 9628]	0	0	0	0	0	0	1	0	0	0	0	0	0	0	0
AEM40053.1	KVU_0214 (BglsF) [Ketogulonigenium vulgarum WSH-001]	0	0	0	0	1	0	0	0	0	0	0	0	0	0	0
ABS04014.1	Krad_2539 [Kineococcus radiotolerans SRS30216]	0	0	1	0	0	0	0	0	0	0	0	0	0	0	0
BAJ26087.1	KSE_02360 [Kitasatospora setae KM-6054 ATCC 33774]	0	0	0	0	3	0	0	0	0	0	0	0	0	0	0
ACI12038.1	KPK_A0120 [Klebsiella pneumoniae 342]	0	1	1	0	0	0	0	1	0	0	0	0	0	0	0
ADB35339.1	Kfla_6337 [Kribbella flavida DSM 17836]	0	0	0	0	1	0	0	0	0	0	0	0	0	0	0
ADB33262.1	Kfla_4226 [Kribbella flavida DSM 17836]	0	0	0	0	0	0	0	0	0	0	0	0	0	1	0
ADB33710.1	Kfla_4693 [Kribbella flavida DSM 17836]	0	0	0	0	0	0	0	1	0	0	0	0	0	1	0
ACV05808.1	Ksed_07520 [Kytococcus sedentarius DSM 20547]	0	0	1	0	0	0	0	0	0	0	0	0	0	0	0
AEH02411.1	Lacal_2570 [Lacinutrix sp. 5H-3-7-4]	1	5	1	1	5	0	0	1	1	0	0	0	0	0	3
ACO74830.1	LHK_01846 (NagZ) [Laribacter hongkongensis HLHK9]	0	0	6	0	0	0	0	0	0	0	0	0	0	0	0
ADQ18242.1	Lbys_2580 [Leadbetterella byssophila DSM 17132]	0	0	0	0	1	0	0	0	0	0	0	0	0	0	0
AGW42619.1	O159_27230 [Leifsonia xyli subsp. cynodontis DSM 46306]	0	6	3	0	1	0	0	0	1	0	0	0	0	1	0
AHD01138.1	METH_10975 [Leisingera methylohalidivorans DSM 14336 DSM 14336; MB2]	0	0	0	0	2	0	0	0	0	0	0	0	0	0	0
AET30270.1	MI1_04060 [Leuconostoc mesenteroides subsp. mesenteroides J18]	0	0	0	0	1	0	0	0	0	0	0	0	0	0	0
AGU58326.1	N175_12005 [Listonella anguillarum M3]	0	0	0	0	0	0	0	0	0	0	0	0	0	1	0
AGU59384.1	N175_16570 [Listonella anguillarum M3]	0	0	2	0	0	0	0	0	0	0	0	0	0	0	0
ACA39985.1	Bsph_2432 [Lysinibacillus sphaericus C3-41]	1	0	0	0	0	0	0	0	0	0	0	0	0	0	0
CDK98255.1	MGMSR_1040 (NagZ) [Magnetospirillum gryphiswaldense MSR-1 v2]	0	4	0	0	0	1	0	0	1	0	0	0	0	0	0
CCQ73625.1	MGMAQ_1721 [Magnetospirillum QH-2]	0	4	2	0	0	0	0	1	0	0	0	0	0	1	0
AEE97207.1	Mahau_2031 [Mahella australiensis 50-1 BON]	0	0	0	0	3	0	0	0	0	0	0	0	0	0	0
EAR01079.1	FB2170_09916 [Flavobacteriales bacterium HTCC2170]	3	6	1	0	4	0	1	0	2	0	0	0	0	0	2
EAR01577.1	FB2170_13653 [Flavobacteriales bacterium HTCC2170]	0	0	0	0	1	0	0	0	0	0	0	0	0	0	0
ABI64542.1	Mmar10_0249 [Maricaulis maris MCS10]	0	0	0	0	0	0	0	0	0	0	0	0	0	2	0
ABI64894.1	Mmar10_0601 [Maricaulis maris MCS10]	0	1	1	0	0	0	0	0	0	0	0	0	0	0	0
ABI66204.1	Mmar10_1912 [Maricaulis maris MCS10]	0	11	4	0	0	0	0	0	0	0	0	0	0	2	0
ABI67012.1	Mmar10_2726 [Maricaulis maris MCS10]	0	4	1	0	3	0	0	0	0	0	0	1	0	4	0
ABI67015.1	Mmar10_2729 [Maricaulis maris MCS10]	0	2	0	0	0	0	0	0	0	0	0	1	0	0	0
ABR71674.1	Mmwyl1_2761 [Marinomonas sp. MWYL1]	0	1	1	0	0	0	0	0	0	0	0	0	0	1	0
ABR71969.1	Mmwyl1_3059 [Marinomonas sp. MWYL1]	0	0	0	0	1	0	0	0	0	1	0	0	0	0	0
ADR21787.1	Ftrac_1799 [Marivirga tractuosa DSM 4126]	0	0	0	0	2	0	0	0	0	0	0	0	0	0	0
ADR23286.1	Ftrac_3312 [Marivirga tractuosa DSM 4126]	0	0	0	0	4	0	1	0	0	0	0	0	0	0	0
ADC53302.1	beta-glucosidase (Gluc3M) (3.2.1.21) [Martelella mediterranea gluc3m]	0	0	0	0	1	0	0	0	0	0	0	0	0	0	0
AFN73996.1	MROS_0754 [Melioribacter roseus P3M]	0	0	0	0	0	0	0	0	0	0	0	0	0	1	0
AFN74816.1	MROS_1580 [Melioribacter roseus P3M]	0	0	0	0	0	0	0	0	0	0	0	0	0	0	1
AFN75314.1	MROS_2084 [Melioribacter roseus P3M]	0	0	0	0	0	0	0	0	0	0	0	0	0	1	0
AFN75434.1	MROS_2204 [Melioribacter roseus P3M]	1	0	0	0	2	0	0	0	0	0	0	0	0	0	0
ADV12612.1	Mesci_3492 [Mesorhizobium ciceri biovar biserrulae WSM1271]	0	0	1	0	0	0	0	0	0	0	0	0	0	0	0
AID30542.1	MCHK_2732 (NagZ) [Mesorhizobium huakuii 7653R]	1	19	2	0	0	1	0	0	0	0	0	0	0	0	0
BAB48541.1	Mll1089 [Mesorhizobium loti MAFF303099]	0	6	0	0	0	0	0	0	0	0	0	0	0	2	0
AEH88417.1	Mesop_3981 [Mesorhizobium opportunistum WSM2075]	1	18	2	0	0	0	0	1	0	0	0	0	0	0	0
ABR12885.1	ORF31 [Mesorhizobium sp. CJ1]	0	0	0	0	0	0	0	1	0	0	0	0	0	0	0
ACD83802.1	Minf_1748 [Methylacidiphilum infernorum V4]	0	0	0	0	0	0	0	0	0	0	0	0	0	1	0
ABM93617.1	Mpe_A0655 [Methylibium petroleiphilum PM1]	0	0	1	0	0	0	0	1	0	0	0	0	0	0	0
CAX25833.1	METDI4201 [Methylobacterium dichloromethanicum DM4]	0	1	0	0	0	0	0	0	0	0	0	0	0	0	0
ACS41339.1	MexAM1_META1p3626 [Methylobacterium extorquens AM1]	0	1	0	0	1	1	0	0	0	0	0	0	0	1	0
ACK84526.1	Mchl_3707 [Methylobacterium chloromethanicum CM4]	0	2	1	0	0	0	0	0	0	0	0	0	0	0	0
ACL57162.1	Mnod_2180 [Methylobacterium nodulans ORS 2060]	0	3	0	0	0	1	0	0	0	0	0	0	0	0	1
ACB81738.1	Mpop_3589 [Methylobacterium populi BJ001]	0	1	0	0	0	0	0	0	0	0	0	2	0	0	0
ACB24749.1	Mrad2831_2765 [Methylobacterium radiotolerans JCM 2831]	1	5	1	0	0	0	0	0	0	0	0	0	0	0	0
ACA16934.1	M446_2482 [Methylobacterium sp. 4-46]	0	6	0	0	0	0	0	0	0	0	0	0	0	1	0
AAU91985.1	MCA1984 [Methylococcus capsulatus str. Bath]	0	0	0	0	1	0	0	0	0	0	0	0	0	0	0
CCJ05511.1	BN69_0060 [Methylocystis sp. SC2]	1	36	0	0	0	0	0	1	0	0	0	0	0	0	0
CCJ07333.1	BN69_1882 [Methylocystis sp. SC2]	0	1	0	0	0	0	0	0	0	0	0	0	0	0	0
CCE25180.1	MEALZ_3518 (NagZ) [Methylomicrobium alcaliphilum 20Z]	0	1	0	0	0	0	0	0	0	0	0	0	0	1	0
AEG01966.1	Metme_3603 [Methylomonas methanica MC09]	0	0	0	0	0	0	0	1	0	0	0	0	0	0	0
AFI84341.1	Q7A_1515 [Methylophaga sp. JAM1]	1	0	0	0	0	0	0	0	0	0	0	0	0	0	0
ADQ84178.1	MPQ_1010 (BglX) [Methylovorus sp. MP688]	0	0	1	0	0	0	0	0	0	0	0	0	0	1	0
AEP08967.1	MICA_633 [Micavibrio aeruginosavorus ARL-13]	0	1	0	0	0	0	0	0	0	0	0	0	0	1	0
AGH97376.1	A11S_552 (fragment) [Micavibrio aeruginosavorus EPB]	0	7	1	0	0	0	0	0	0	0	0	0	0	0	0
AGH98723.1	A11S_1922 [Micavibrio aeruginosavorus EPB]	0	0	0	0	0	0	0	0	0	1	0	0	0	0	0
BAJ75411.1	MTES_2447 [Microbacterium testaceum StLB037]	0	3	1	0	1	0	0	0	0	0	0	0	0	0	0
BAJ74679.1	MTES_1715 [Microbacterium testaceum StLB037]	0	0	0	0	0	0	0	0	0	0	0	0	0	0	1
AAT81216.1	1,4-beta-D-glucan glucohydrolase (CelA) [Microbulbifer hydrolyticus]	0	1	1	0	5	0	0	1	0	0	0	1	0	1	0
AFZ20113.1	Mic7113_4420 [Microcoleus sp. PCC 7113]	0	0	0	0	0	0	0	0	0	0	0	0	0	2	0
BAK33712.1	MLP_06980 [Microlunatus phosphovorus NM-1]	0	0	0	0	0	0	0	1	0	0	0	0	0	0	0
ADU10234.1	ML5_4758 [Micromonospora sp. L5]	0	0	0	0	1	0	0	0	0	0	0	0	0	0	0
CCH88401.1	MODMU_2974 [Modestobacter marinus BC501]	0	0	0	1	0	0	0	0	0	0	0	0	0	0	0
CCH88469.1	MODMU_3043 (BglB) [Modestobacter marinus BC501]	0	0	0	0	3	0	0	0	0	0	0	0	0	1	0
AAS27873.1	Sequence 3015 from patent US 6673910 (fragment) [Moraxella catarrhalis]	0	0	0	0	0	0	0	0	0	0	0	0	0	1	0
AEM71342.1	Murru_2304 [Muricauda ruestringensis DSM 13258]	1	8	0	0	5	0	3	0	0	0	0	0	0	0	1
AEM69294.1	Murru_0238 [Muricauda ruestringensis DSM 13258]	0	1	0	0	0	0	0	0	0	0	0	0	0	0	0
AEM71826.1	Murru_2802 [Muricauda ruestringensis DSM 13258]	0	1	0	0	0	0	0	0	0	0	0	0	0	0	0
ACV77297.1	Namu_0886 [Nakamurella multipartita DSM 44233]	0	0	0	0	1	0	0	0	0	0	0	0	0	0	0
CBN87914.1	NLA_17090 [Neisseria lactamica ST-640 020-06]	0	0	1	0	0	0	0	0	0	0	0	0	0	0	0
AHF14920.1	NIASO_06590 [Niabella soli DSM 19437 JS13-8; DSM 19437]	2	1	1	0	0	0	0	0	1	0	0	0	0	0	0
AHF16236.1	NIASO_15875 [Niabella soli DSM 19437 JS13-8; DSM 19437]	0	0	0	0	0	0	0	0	0	0	0	0	0	2	0
AHF16354.1	NIASO_16715 [Niabella soli DSM 19437 JS13-8; DSM 19437]	0	0	0	0	0	0	0	0	1	0	0	0	0	0	0
AHF16547.1	NIASO_17980 [Niabella soli DSM 19437 JS13-8; DSM 19437]	0	3	0	0	1	0	0	0	0	0	0	2	0	1	0
AEV99183.1	Niako_2849 [Niastella koreensis GR20-10]	0	0	0	0	1	0	1	1	0	0	0	2	0	2	0
AEW02328.1	Niako_6103 [Niastella koreensis GR20-10]	0	0	1	0	0	0	0	0	0	0	0	0	0	0	0
AEW02866.1	Niako_6642 [Niastella koreensis GR20-10]	0	0	1	0	0	0	0	1	0	0	0	0	0	0	0
AEW03493.1	Niako_7277 [Niastella koreensis GR20-10]	0	0	0	0	1	0	0	0	0	0	0	0	0	0	0
AEV96460.1	Niako_0058 [Niastella koreensis GR20-10]	5	0	1	0	1	0	0	0	0	0	0	1	0	0	0
ABE62574.1	Nham_1760 [Nitrobacter hamburgensis X14]	0	0	1	0	0	0	0	0	0	0	0	0	0	0	0
ABA05066.1	Nwi_1805 [Nitrobacter winogradskyi Nb-255]	0	1	0	0	0	0	0	0	0	0	0	0	0	0	1
ADE15923.1	Nhal_2858 [Nitrosococcus halophilus Nc4]	0	0	0	0	0	0	0	0	0	0	0	0	0	0	1
ADJ27847.1	Nwat_0903 [Nitrosococcus watsoni C-113]	0	0	0	0	0	0	0	0	0	0	0	0	0	1	0
CAD86232.1	NE2320 [Nitrosomonas europaea ATCC 19718]	0	0	1	0	0	0	0	0	0	0	0	0	0	0	0
ADZ25944.1	NAL212_1027 [Nitrosomonas sp. AL212]	0	0	2	0	0	0	0	0	0	0	0	0	0	0	0
AEJ01748.1	Nit79A3_1950 [Nitrosomonas sp. Is79A3]	0	0	1	0	0	0	0	0	0	0	0	0	0	0	0
ABB75058.1	Nmul_A1761 [Nitrosospira multiformis ATCC 25196]	0	0	0	0	0	0	0	0	0	0	0	0	0	1	0
AGC77493.1	DDD_2367 [Nonlabens dokdonensis DSW-6]	0	1	1	1	10	0	6	3	2	1	0	0	1	1	1
AGC78214.1	DDD_3087 [Nonlabens dokdonensis DSW-6]	6	6	1	2	7	0	0	0	1	0	0	1	1	1	3
BAO56539.1	NMS_2530 [Nonlabens marinus S1-08]	6	14	2	0	14	2	2	0	1	1	0	1	0	0	0
ABD25536.1	Saro_1091 [Novosphingobium aromaticivorans DSM 12444]	0	5	1	0	0	0	0	0	0	0	0	0	0	0	0
ABD26051.1	Saro_1611 [Novosphingobium aromaticivorans DSM 12444]	0	8	1	0	0	0	0	0	0	0	0	0	0	0	0
CCA91507.1	PP1Y_AT5426 [Novosphingobium sp. PP1Y]	0	2	2	0	2	1	0	0	0	0	0	1	0	0	0
CCA94337.1	PP1Y_AT36285 [Novosphingobium sp. PP1Y]	2	9	0	0	0	0	0	0	1	0	0	1	0	0	1
AGI68320.1	OAN307_c27440 (NagZ) [Octadecabacter antarcticus 307]	0	9	0	1	0	0	0	0	0	0	0	0	0	0	0
AGI72364.1	OA238_c22900 (NagZ) [Octadecabacter arcticus 238]	0	0	1	0	1	0	0	0	0	0	0	0	0	1	0
ADY33812.1	Odosp_2834 [Odoribacter splanchnicus DSM 20712]	0	0	0	0	1	0	0	0	0	0	0	0	0	0	0
ADY34197.1	Odosp_3238 [Odoribacter splanchnicus DSM 20712]	0	0	1	0	3	0	0	0	0	0	0	0	0	0	0
AEI02899.1	OCA4_c17610 (NagZ) [Oligotropha carboxidovorans OM4]	0	0	1	0	0	0	1	0	0	0	0	0	0	0	0
ACI93384.1	OCAR_6271 [Oligotropha carboxidovorans OM5 ATCC 49405]	0	1	0	0	0	0	0	0	0	0	0	0	0	0	0
ADK68811.1	Olsu_1723 [Olsenella uli DSM 7084]	0	0	1	0	0	0	0	0	0	0	0	0	0	0	0
ACB74105.1	Oter_0817 [Opitutus terrae PB90-1]	0	0	0	0	0	0	0	0	0	0	0	0	0	1	0
ACB74660.1	Oter_1375 [Opitutus terrae PB90-1]	2	0	1	0	0	0	0	0	0	0	0	0	0	1	0
ACB76499.1	Oter_3219 [Opitutus terrae PB90-1]	0	1	0	0	0	0	0	0	0	0	0	0	0	0	0
AFL96520.1	Ornrh_0302 [Ornithobacterium rhinotracheale DSM 15997]	0	0	1	0	0	0	1	1	0	0	0	0	0	0	0
AEV32140.1	Oweho_1135 [Owenweeksia hongkongensis DSM 17368]	0	4	0	0	4	0	1	0	1	0	0	0	0	0	0
AFC28617.1	PM3016_1703 [Paenibacillus mucilaginosus 3016]	0	0	0	0	1	0	0	0	0	0	0	0	0	0	0
AFH61237.1	B2K_10975 [Paenibacillus mucilaginosus K02]	0	0	0	0	0	0	0	0	0	0	0	1	0	0	0
AFH60457.1	B2K_06930 [Paenibacillus mucilaginosus K02]	0	0	0	1	0	0	0	0	0	0	0	0	0	0	0
AHC20113.1	X809_13275 [Paenibacillus polymyxa CR1]	0	0	0	0	0	0	1	0	0	0	0	0	0	0	0
ACS99517.1	Pjdr2_0838 [Paenibacillus sp. JDR-2]	0	0	1	0	2	0	0	0	0	0	0	0	0	0	0
ACT02261.1	Pjdr2_3629 [Paenibacillus sp. JDR-2]	0	0	0	0	0	0	0	0	0	0	0	1	0	0	0
ACT00657.1	Pjdr2_2000 [Paenibacillus sp. JDR-2]	0	0	0	0	0	0	0	0	0	0	0	0	0	1	0
ACT02262.1	Pjdr2_3630 [Paenibacillus sp. JDR-2]	0	0	0	0	0	0	0	0	0	0	0	1	0	0	0
ACT02307.1	Pjdr2_3676 [Paenibacillus sp. JDR-2]	1	44	2	0	0	0	0	0	0	0	0	0	0	0	0
ACT03723.1	Pjdr2_5112 [Paenibacillus sp. JDR-2]	0	0	0	0	0	0	0	0	0	0	0	0	0	2	0
BAJ09393.1	beta-glucosidase (PstG;PSTG) (3.2.1.21) [Paenibacillus sp. KB0549]	0	0	0	0	0	0	0	0	0	1	0	0	0	1	0
BAC16750.1	glucocerebrosidase (3.2.1.45) [Paenibacillus sp. TS12]	0	0	0	0	0	0	0	0	0	0	0	0	0	1	0
ACX62788.1	GYMC10_0484 [Paenibacillus sp. Y412MC10]	0	0	0	0	0	0	0	0	0	0	0	0	0	1	0
ACX64155.1	GYMC10_1872 [Paenibacillus sp. Y412MC10]	0	0	0	0	1	0	0	0	0	0	0	0	0	1	0
ACX65411.1	GYMC10_3155 [Paenibacillus sp. Y412MC10]	0	0	0	0	0	0	0	0	0	0	0	0	0	0	1
AET59257.1	HPL003_12510 [Paenibacillus terrae HPL-003]	0	0	1	0	0	0	0	0	0	0	0	0	0	0	0
AET57453.1	HPL003_03375 [Paenibacillus terrae HPL-003]	0	1	0	0	0	0	0	0	0	0	0	0	0	0	0
AHW98795.1	1,4-beta-glucan glucohydrolase [Paenibacillus terrae HPL-003]	0	0	0	0	1	0	0	0	0	0	0	0	0	0	0
ADQ78405.1	Palpr_0243 [Paludibacter propionicigenes WB4]	0	0	0	0	0	0	1	0	0	0	0	0	0	0	0
ADQ78502.1	Palpr_0341 [Paludibacter propionicigenes WB4]	0	0	0	0	1	0	0	0	0	0	0	0	0	0	0
ADQ80142.1	Palpr_2005 [Paludibacter propionicigenes WB4]	0	1	1	0	0	0	0	0	0	1	0	0	0	1	0
ADQ80253.1	Palpr_2117 [Paludibacter propionicigenes WB4]	0	0	0	0	3	0	0	0	0	0	0	0	0	0	0
ADQ80689.1	Palpr_2557 [Paludibacter propionicigenes WB4]	0	0	0	0	1	0	0	0	0	0	0	0	0	0	0
ADQ81047.1	Palpr_2918 [Paludibacter propionicigenes WB4]	0	0	0	0	1	0	0	0	0	0	0	0	0	0	0
BAK11365.1	PAJ_1285 (BglX) [Pantoea ananatis AJ13355]	0	0	1	0	0	0	0	0	0	0	0	0	0	0	0
AER32664.1	PAGR_g2154 [Pantoea ananatis PA13]	0	0	0	0	0	0	0	0	0	0	0	1	0	0	0
ADU68515.1	Pat9b_1193 [Pantoea sp. At-9b]	0	1	0	0	0	0	0	0	0	0	0	0	0	0	0
ADO09106.1	Pvag_0909 (YcfO) [Pantoea vagans C9-1]	0	0	0	0	0	0	0	0	0	0	0	0	0	1	0
ABR44774.1	BDI_3068 [Parabacteroides distasonis ATCC 8503]	0	0	0	0	2	0	0	0	0	0	0	0	0	0	0
ABR42969.1	BDI_1208 [Parabacteroides distasonis ATCC 8503]	0	1	0	0	1	0	0	0	0	0	0	0	0	0	0
ABR44153.1	BDI_2428 [Parabacteroides distasonis ATCC 8503]	0	0	0	1	1	0	0	0	0	0	0	0	0	0	0
ABR44063.1	BDI_2338 [Parabacteroides distasonis ATCC 8503]	0	0	0	0	2	0	0	1	0	0	0	0	0	0	0
AGT08196.1	JCM7686_1087 [Paracoccus aminophilus JCM 7686]	0	2	0	0	3	0	0	0	0	0	0	0	0	0	0
ABL69965.1	Pden_1868 [Paracoccus denitrificans PD1222]	0	9	0	0	0	0	0	0	0	0	0	0	0	0	0
ABS64631.1	Plav_3024 [Parvibaculum lavamentivorans DS-1]	0	3	0	0	1	0	0	0	0	0	0	0	0	1	0
ADM09490.1	PB2503_07122 [Parvularcula bermudensis HTCC2503]	1	5	0	0	0	0	0	0	0	0	0	0	0	0	0
ACU03016.1	Phep_0794 [Pedobacter heparinus DSM 2366]	0	2	0	0	1	0	0	0	0	0	0	0	0	0	0
ACU04484.1	Phep_2280 [Pedobacter heparinus DSM 2366]	2	6	1	0	1	0	0	0	0	0	0	0	0	0	1
ACU06374.1	Phep_4183 [Pedobacter heparinus DSM 2366]	0	0	0	0	0	0	0	1	0	0	0	0	0	0	0
ACU05829.1	Phep_3638 [Pedobacter heparinus DSM 2366]	0	0	0	0	2	0	0	0	0	0	0	0	0	0	0
ACU06295.1	Phep_4104 [Pedobacter heparinus DSM 2366]	0	0	0	0	1	0	0	0	0	0	0	0	0	1	0
ADY52415.1	Pedsa_1861 [Pedobacter saltans DSM 12145]	0	0	0	0	0	0	1	0	0	0	0	0	0	0	0
ADY52621.1	Pedsa_2069 [Pedobacter saltans DSM 12145]	1	0	0	0	1	0	0	0	0	0	0	0	0	2	1
ADY52720.1	Pedsa_2168 [Pedobacter saltans DSM 12145]	0	0	0	0	1	0	0	0	0	0	0	0	0	0	0
ADY53375.1	Pedsa_2834 [Pedobacter saltans DSM 12145]	0	1	0	0	1	0	0	0	0	0	0	0	0	0	0
ADY53614.1	Pedsa_3075 [Pedobacter saltans DSM 12145]	0	0	0	0	3	0	1	0	0	0	0	1	0	0	0
ADY50690.1	ADY50690.1 (short fragment) [Pedobacter saltans DSM 12145]	31	155	13	0	5	12	2	7	13	0	0	6	2	13	0
AEQ51272.1	KKY_1244 [Pelagibacterium halotolerans B2]	0	0	0	0	1	0	0	0	0	0	0	0	0	0	0
ABA88567.1	Pcar_1318 [Pelobacter carbinolicus DSM 2380]	0	0	0	0	0	0	0	0	0	0	0	0	0	2	0
BAF60462.1	PTH_2281 [Pelotomaculum thermopropionicum SI]	0	0	1	0	2	0	0	0	0	0	0	1	0	0	0
AFO87109.1	PGA2_c11000 [Phaeobacter gallaeciensis 2.10]	0	6	1	0	1	0	0	0	0	0	0	0	0	0	0
AHD10118.1	Gal_02373 [Phaeobacter gallaeciensis DSM 26640]	0	4	0	0	2	0	0	0	1	0	0	0	0	0	1
AFO90835.1	PGA1_c11160 [Phaeobacter gallaeciensis DSM 17395]	0	3	0	0	2	0	0	0	0	0	0	0	0	1	1
ACG79338.1	PHZ_c2929 [Phenylobacterium zucineum HLK1]	0	0	0	0	1	0	0	0	0	0	0	0	0	0	0
ACG78377.1	PHZ_c1966 [Phenylobacterium zucineum HLK1]	1	3	0	2	0	0	0	0	1	0	0	1	0	0	0
ACG79335.1	PHZ_c2926 (CelD) [Phenylobacterium zucineum HLK1]	0	2	0	0	1	0	0	1	0	0	0	0	0	0	0
CAG18892.1	PBPRA0461 [Photobacterium profundum SS9]	0	0	0	0	2	0	0	0	0	0	0	0	0	0	0
CAE15196.1	plu2822 (Nagz) [Photorhabdus luminescens subsp. laumondii TTO1]	0	1	0	0	0	0	0	0	0	0	0	0	0	1	0
AII87217.1	RCA23_c16820 (NagZ) [Planktomarina temperata RCA23]	0	1	2	0	5	0	2	0	0	0	0	0	0	2	1
BAN98430.1	E05_36640 [Plautia stali symbiont]	0	1	0	0	0	0	0	0	0	0	0	0	0	1	0
AFY75765.1	Ple7327_0300 [Pleurocapsa sp. PCC 7327]	0	0	0	0	0	0	0	0	0	0	0	2	0	0	0
EAQ42058.2	MED152_05050 (NagA) [Polaribacter sp. MED152]	0	3	0	1	3	0	2	0	1	0	0	0	0	0	0
ZP_01052630.1	ZP_01052630.1 [Polaribacter sp. MED152]	0	2	0	1	7	0	0	0	0	0	0	0	0	4	0
ADZ70616.1	SL003B_2191 [Polymorphum gilvum SL003B-26A1]	0	3	0	0	0	0	0	0	0	0	0	0	0	0	0
AEE12612.1	Poras_0662 [Porphyromonas asaccharolytica DSM 20707]	0	0	0	0	0	0	0	0	0	0	0	0	0	1	0
BAG32528.1	PGN_0009 [Porphyromonas gingivalis ATCC 33277]	0	0	0	0	0	0	0	0	0	0	0	1	0	0	0
BAK24182.1	PGTDC60_0011 [Porphyromonas gingivalis TDC60]	0	0	1	0	0	0	0	0	0	0	0	0	0	0	0
AAQ65269.1	PG0011 [Porphyromonas gingivalis W83]	0	0	1	0	0	0	0	0	0	0	0	0	0	0	0
ADD92016.1	(3.2.1.37) [Prevotella bryantii B14]	0	0	0	0	1	0	0	0	0	0	0	0	0	0	0
AGB29451.1	Prede_2178 [Prevotella dentalis DSM 3688]	0	0	0	0	0	0	0	0	0	1	0	0	0	0	0
ADK97433.1	HMPREF0659_A6561 [Prevotella melaninogenica ATCC 25845]	0	0	1	0	0	0	0	0	0	0	0	0	0	0	0
ACN78955.1	(3.2.1.37) [Prevotella ruminicola 23]	0	0	0	0	0	0	0	0	0	0	0	0	0	1	0
ADE81332.1	PRU_2590 [Prevotella ruminicola 23]	0	0	0	0	0	0	0	0	0	0	0	0	0	1	0
ADE82486.1	PRU_0416 (BglX) [Prevotella ruminicola 23]	0	0	0	0	1	0	0	0	0	0	0	0	0	1	0
ADE82797.1	PRU_2693 [Prevotella ruminicola 23]	0	0	0	0	1	0	0	0	0	0	0	0	0	0	0
CAE22138.1	PMT1964 [Prochlorococcus marinus str. MIT 9313]	0	0	0	0	0	0	0	0	0	0	0	0	0	0	1
AEH57204.1	ORF (fragment) [Prochloron didemni P1-Palau]	0	3	0	0	0	0	0	2	2	0	0	0	0	0	0
AFV89792.1	PACID_19970 [Propionibacterium acidipropionici ATCC 4875]	0	0	1	0	0	0	0	0	0	0	0	0	0	0	0
AGJ77826.1	PALO_06090 [Propionibacterium avidum 44067]	0	0	0	0	0	0	0	1	0	0	0	0	0	0	0
ABG39353.1	Patl_0825 [Pseudoalteromonas atlantica T6c]	0	0	1	0	1	0	0	0	0	0	0	0	0	0	0
ABG40237.1	Patl_1716 [Pseudoalteromonas atlantica T6c]	0	0	1	0	0	0	0	0	0	0	0	0	0	0	0
AHX39864.1	beta-hexosaminidase [Pseudoalteromonas luteoviolacea HI1]	0	0	0	1	1	0	0	0	0	0	0	0	0	0	0
ABC88234.1	exo-1,3/1,4-beta-glucanase (GluA;ExoP) (3.2.1.-) [Pseudoalteromonas sp. BB1]	0	6	0	0	0	0	0	0	0	0	0	0	0	0	0
ADT67612.1	PSM_A0662 [Pseudoalteromonas sp. SM9913]	0	1	1	0	1	0	0	0	0	0	0	0	0	0	0
ADT70107.1	PSM_B0067 [Pseudoalteromonas sp. SM9913]	0	0	0	2	0	0	0	0	0	0	0	0	0	0	0
AIL60269.1	PSAKL28_10390 [Pseudomonas alkylphenolia KL28]	0	0	0	0	1	0	0	0	0	0	0	0	0	0	0
AHF67092.1	PCH70_19390 [Pseudomonas cichorii JBC1]	0	0	0	0	1	0	0	0	0	0	0	0	0	0	0
AEV64676.1	PSF113_4687 [Pseudomonas fluorescens F113]	0	0	0	0	1	0	0	0	0	0	0	0	0	0	0
AIG05229.1	HZ99_24725 [Pseudomonas fluorescens UK4]	0	0	0	0	0	0	0	1	0	0	0	0	0	0	0
AEJ12283.1	PPS_1710 [Pseudomonas putida S16]	0	0	0	0	0	0	1	0	0	0	0	0	0	0	0
AIB35446.1	PS417_07620 [Pseudomonas simiae WCS417]	0	0	0	0	0	0	0	0	0	0	0	0	0	1	0
CEA05544.1	BN1049_02138 (YcfO) [Pseudomonas sp. 12M76_air]	0	2	0	0	0	0	0	0	0	0	0	0	0	0	0
AGA60134.1	BglG1537b [Pseudonocardia sp. Gsoil1536]	0	0	0	0	0	0	0	0	0	0	0	0	0	0	1
AEV37752.1	PSE_3244 (NagZ) [Pseudovibrio sp. FO-BEG1]	0	0	0	0	0	0	0	0	0	0	0	0	0	1	0
ADV25933.1	Psesu_0070 [Pseudoxanthomonas suwonensis 11-1]	0	6	1	0	0	0	0	0	1	0	0	1	0	0	0
ADV28747.1	Psesu_2923 [Pseudoxanthomonas suwonensis 11-1]	0	0	1	0	1	0	0	0	0	0	0	0	0	0	0
AFU68441.1	P700755_001556 [Psychroflexus torquis ATCC 700755]	0	0	0	2	6	0	3	1	0	1	0	0	2	2	4
AFU70238.1	P700755_003643 [Psychroflexus torquis ATCC 700755]	3	6	1	0	8	0	0	3	0	0	0	0	0	0	1
AGH81122.1	PCNPT3_05900 [Psychromonas sp. CNPT3]	0	0	2	0	0	0	0	0	0	0	0	0	0	0	0
AEX51668.1	Rahaq2_1799 [Rahnella aquatilis CIP 78.65 = ATCC 33071]	0	0	0	0	1	0	0	0	0	0	0	0	0	1	0
AEX52790.1	Rahaq2_2964 [Rahnella aquatilis CIP 78.65 = ATCC 33071]	0	0	0	0	0	0	0	0	0	0	0	0	0	1	0
ADW72159.1	Rahaq_0531 [Rahnella sp. Y9602]	0	2	0	0	0	0	1	0	0	0	0	0	0	0	0
AGW50696.1	beta-glucosidase (BglH) [Raoultella ornithinolytica H1]	0	0	0	0	0	0	0	0	1	0	0	0	0	0	0
ACE93778.1	RHECIAT_PB0000060 (BglsB) [Rhizobium etli CIAT 652]	0	0	1	1	0	0	0	0	0	0	0	0	0	0	0
AHG49297.1	RLEG12_10150 [Rhizobium leguminosarum bv. trifolii CB782]	0	0	0	0	1	0	0	0	0	0	0	0	0	0	0
ACS55969.1	Rleg_1682 [Rhizobium leguminosarum bv. trifolii WSM1325]	0	0	0	0	1	0	0	0	0	0	0	0	0	0	0
CDM57534.1	LPU83_1872 (NagZ) [Rhizobium sp. LPU83]	0	0	0	0	1	0	0	0	0	0	0	0	0	0	0
ADE84621.1	RCAP_rcc00856 (NagZ) [Rhodobacter capsulatus SB1003]	0	9	0	1	0	0	0	0	0	0	0	0	0	0	1
ABA79101.1	RSP_2941 [Rhodobacter sphaeroides 2.4.1 ATCC BAA-808]	0	1	0	0	2	1	0	0	0	0	0	0	0	2	0
ABP69807.1	Rsph17025_0904 [Rhodobacter sphaeroides ATCC 17025]	0	3	0	0	2	1	0	0	0	1	0	0	0	0	0
ABN76696.1	Rsph17029_1586 [Rhodobacter sphaeroides ATCC 17029]	0	2	2	0	0	0	0	0	0	0	0	0	0	1	0
ACM01120.1	RSKD131_1260 [Rhodobacter sphaeroides KD131 KD131; KCTC 12085]	0	1	0	0	0	0	0	0	0	0	0	0	0	0	0
CBH47147.1	REQ_10460 [Rhodococcus equi 103S]	0	0	0	0	1	0	0	0	0	0	0	0	0	0	0
BAH34519.1	RER_38110 (BglB) [Rhodococcus erythropolis PR4 PR4 (= NBRC 100887)]	0	0	0	0	0	0	0	0	0	0	0	1	0	0	0
AHK34401.1	Pd630_LPD07216 [Rhodococcus opacus PD630]	0	0	0	0	1	0	0	0	0	1	0	0	0	0	0
ABD68854.1	Rfer_1113 [Rhodoferax ferrireducens T118 DSM 15236]	0	0	1	0	0	0	0	0	0	0	0	0	0	0	0
ADP71158.1	Rvan_1922 [Rhodomicrobium vannielii ATCC 17100]	0	2	0	0	0	0	0	0	0	0	0	0	0	0	0
ABJ06630.1	RPE_2693 [Rhodopseudomonas palustris BisA53]	0	0	0	0	0	1	0	0	0	0	0	0	0	0	0
CAE28293.1	RPA2852 [Rhodopseudomonas palustris CGA009]	0	19	0	0	0	0	0	0	0	0	0	0	0	0	0
ADU44238.1	Rpdx1_2652 [Rhodopseudomonas palustris DX-1]	0	11	2	0	0	1	0	0	0	0	0	0	0	1	0
ACF01695.1	Rpal_3192 [Rhodopseudomonas palustris TIE-1]	1	56	0	0	0	0	0	1	0	0	0	1	1	0	0
ACI98450.1	RC1_1027 [Rhodospirillum centenum SW ATCC 51521]	0	1	1	0	0	0	0	0	0	0	0	0	0	0	0
CCG09636.1	RSPPHO_03010 [Rhodospirillum photometricum DSM 122]	0	3	1	0	0	0	0	0	0	0	0	0	0	0	0
ABC22577.1	Rru_A1777 [Rhodospirillum rubrum ATCC 11170]	0	1	0	0	0	0	1	0	0	0	0	0	0	0	0
ABC24094.1	Rru_A3299 [Rhodospirillum rubrum ATCC 11170]	0	1	0	0	0	0	0	0	0	0	0	0	0	0	0
AEO49840.1	F11_16900 [Rhodospirillum rubrum F11]	0	1	0	0	0	0	0	0	0	0	0	0	0	0	0
AEO48295.1	F11_09145 [Rhodospirillum rubrum F11]	0	2	0	0	0	0	0	0	0	0	0	0	0	0	0
ACY47437.1	Rmar_0536 [Rhodothermus marinus DSM 4252]	1	0	2	0	0	0	0	0	1	0	0	0	0	0	0
ACY47819.1	Rmar_0925 [Rhodothermus marinus DSM 4252]	0	0	1	0	0	0	0	0	0	0	0	0	0	0	0
ABV75344.1	A1C_05545 [Rickettsia akari str. Hartford]	0	7	0	0	0	0	0	0	0	0	0	0	0	0	0
AFC70845.1	MC5_02315 [Rickettsia australis str. Cutlack]	0	5	0	0	0	0	0	0	0	0	0	0	0	0	0
AFB21420.1	RCA_04325 [Rickettsia canadensis str. CA410]	0	7	0	0	0	0	0	0	0	0	0	0	0	0	0
ABV73862.1	A1E_04685 [Rickettsia canadensis str. McKiel]	1	15	0	0	0	0	0	0	0	0	0	0	0	0	0
AAY61054.1	RF_0203 [Rickettsia felis URRWXCal2]	0	6	0	0	0	0	0	0	0	0	0	0	0	0	0
ACR47175.1	RPR_01325 [Rickettsia peacockii str. Rustic]	0	0	0	0	1	0	0	0	0	0	0	0	0	0	1
AFD56623.1	RA0C_1736 [Riemerella anatipestifer DSM 15868]	0	0	0	0	1	0	0	0	0	0	0	0	0	0	0
AIH02032.1	M949_0863 [Riemerella anatipestifer CH3]	0	0	0	0	1	0	0	0	0	1	0	0	0	0	0
AFR35020.1	B739_0416 [Riemerella anatipestifer RA-CH-1]	0	0	0	0	0	0	0	0	0	0	0	0	0	1	0
EAR14775.1	RB2501_10632 [Robiginitalea biformata HTCC2501]	0	0	1	0	5	0	0	1	0	1	0	0	0	1	4
EAR15303.1	RB2501_13284 [Robiginitalea biformata HTCC2501]	2	2	0	0	4	1	1	1	2	0	0	0	0	0	0
CBL10145.1	ROI_33000 (fragment) [Roseburia intestinalis M50/1]	0	0	0	0	0	0	0	0	0	0	0	0	0	1	0
CBL13846.1	RO1_35910 [Roseburia intestinalis XB6B4]	0	0	1	0	0	0	0	0	0	0	0	0	0	0	0
AHM05728.1	roselon_03473 [Roseibacterium elongatum DSM 19469 DFL-43]	0	0	3	0	0	0	0	0	0	0	0	0	0	1	0
ABU57016.1	Rcas_0901 [Roseiflexus castenholzii DSM 13941]	0	0	0	0	1	0	0	0	0	0	0	0	0	0	0
ABG32670.1	RD1_3163 [Roseobacter denitrificans OCh 114]	2	1	1	0	3	0	0	0	0	0	0	0	0	1	1
AEI94360.1	RLO149_c023910 (NagZ) [Roseobacter litoralis Och 149]	0	0	0	0	3	0	0	0	0	0	0	0	0	0	0
BAL97430.1	RGE_40940 (NagZ) [Rubrivivax gelatinosus IL144]	0	1	0	0	0	0	0	0	0	0	0	0	0	0	0
AAV95752.1	SPO2502 [Silicibacter pomeroyi DSS-3]	0	14	1	0	2	0	0	0	0	0	0	0	0	0	0
ABF63638.1	TM1040_0905 [Silicibacter sp. TM1040]	0	2	0	0	3	0	0	0	0	0	0	0	0	0	0
CAA33665.1	beta-glucosidase B (BglB) (3.2.1.21) [Ruminiclostridium thermocellum DSM 1237]	0	0	0	0	1	0	0	0	0	0	0	0	0	4	0
ADU22299.1	Rumal_1801 (fragment) [Ruminococcus albus 7]	0	0	0	0	1	0	0	0	0	0	0	0	0	0	0
CBL17962.1	RUM_19200 [Ruminococcus sp. 18P13]	0	0	1	0	0	0	0	0	1	0	0	0	0	0	0
AEI46999.1	Runsl_0556 [Runella slithyformis DSM 19594]	1	1	0	0	0	0	0	0	0	0	0	0	0	1	1
AEI48432.1	Runsl_2016 [Runella slithyformis DSM 19594]	0	0	0	0	0	0	0	1	0	0	0	0	0	1	0
ABD79509.1	(3.2.1.21) [Saccharophagus degradans 2-40]	0	4	1	1	1	0	0	1	1	1	0	0	0	0	0
ABD81757.1	(3.2.1.21) [Saccharophagus degradans 2-40]	1	10	2	1	7	0	1	0	2	1	0	2	0	1	1
CAM05671.1	SACE_6502 [Saccharopolyspora erythraea NRRL 2338]	0	0	0	0	1	0	0	0	0	0	0	0	0	0	0
ABC45027.1	SRU_0372 [Salinibacter ruber DSM 13855 M31]	0	0	0	0	0	0	1	0	0	0	0	0	0	0	0
CBH23370.1	SRM_00449 (BglX) [Salinibacter ruber M8]	0	0	8	0	1	0	1	1	0	0	0	0	0	0	0
ABV98441.1	Sare_2600 [Salinispora arenicola CNS-205]	0	0	0	0	0	0	0	0	0	0	0	0	0	1	0
CCC30143.1	SBG_1047 [Salmonella bongori NCTC 12419]	0	3	0	0	0	0	0	0	0	0	0	0	0	0	0
ACZ20402.1	beta-glycosidase (BglSk;Sked_04360) (3.2.1.21) [Sanguibacter keddieii DSM 10542]	2	0	0	0	0	0	0	0	0	0	0	0	0	0	0
ACZ23422.1	Sked_35340 [Sanguibacter keddieii DSM 10542]	0	0	0	0	0	0	0	1	0	0	0	0	0	0	1
AFC24585.1	SGRA_1851 [Saprospira grandis str. Lewin]	0	0	2	0	2	0	0	0	0	0	0	0	0	1	1
AHG20108.1	Z042_11075 [Serratia fonticola RB-25]	0	0	0	0	1	0	0	0	0	0	0	0	0	0	0
CDG47477.1	SCTVLC_0723 (NagZ) [Serratia symbiotica SCt-VLC]	0	1	0	0	0	0	0	0	0	0	0	0	0	0	0
ABL99611.1	Sama_1404 [Shewanella amazonensis SB2B]	0	2	1	0	2	0	0	0	0	0	0	0	0	0	0
AEG12381.1	Sbal175_3142 [Shewanella baltica BA175]	0	0	1	0	0	0	0	1	0	0	0	0	0	0	0
AEH12999.1	Sbal117_1231 [Shewanella baltica OS117]	0	0	1	0	0	0	0	0	0	0	0	0	0	0	0
ABN60653.1	Sbal_1133 [Shewanella baltica OS155]	0	3	0	0	0	0	0	0	0	0	0	0	0	0	0
ABS07336.1	Shew185_1185 [Shewanella baltica OS185]	0	1	0	0	0	0	0	0	0	0	0	0	0	0	0
ABE55884.1	Sden_2605 [Shewanella denitrificans OS217]	0	1	1	0	0	0	0	0	0	0	0	0	0	0	0
ABE55228.1	Sden_1945 [Shewanella denitrificans OS217]	0	0	0	0	0	0	0	0	0	0	0	0	0	1	0
ABI72246.1	Sfri_2401 [Shewanella frigidimarina NCIMB 400]	0	0	0	0	2	0	0	0	0	0	0	0	0	0	0
AAN55290.1	SO_2250 (NagZ) [Shewanella oneidensis MR-1]	0	0	1	0	0	0	0	0	0	0	0	0	0	0	0
ABV86764.1	Spea_1439 [Shewanella pealeana ATCC 700345]	0	0	0	0	2	0	0	0	0	0	0	0	0	0	0
ABV86864.1	Spea_1539 [Shewanella pealeana ATCC 700345]	0	0	0	0	1	0	0	0	0	0	0	0	0	1	0
ACJ28415.1	swp_1637 [Shewanella piezotolerans WP3]	0	1	0	0	0	0	0	0	0	0	0	0	0	1	0
ACA85442.1	Swoo_1149 [Shewanella woodyi ATCC 51908]	0	1	0	0	0	0	0	0	0	0	0	0	0	1	0
ACA88618.1	Swoo_4365 [Shewanella woodyi ATCC 51908]	0	1	0	0	1	0	0	0	0	0	0	0	0	0	0
ACA88619.1	Swoo_4366 [Shewanella woodyi ATCC 51908]	0	0	0	0	0	0	0	0	0	0	0	0	0	0	1
AFJ47483.1	EBL_c23940 (NagZ) [Escherichia blattae DSM 4481]	0	1	0	0	0	0	0	0	0	0	0	0	0	0	0
AFU97466.1	M5M_01175 [Simiduia agarivorans SA1 = DSM 21679]	0	0	0	0	1	0	0	0	0	0	0	0	0	0	0
AFU98525.1	M5M_06650 [Simiduia agarivorans SA1 = DSM 21679]	0	0	0	0	2	0	0	0	0	0	0	0	0	0	0
AFV00797.1	M5M_18340 [Simiduia agarivorans SA1 = DSM 21679]	0	2	0	1	1	0	0	0	0	0	0	0	0	0	0
AFV01014.1	M5M_19455 [Simiduia agarivorans SA1 = DSM 21679]	1	2	4	0	0	0	0	1	0	0	0	0	0	1	0
AEG04083.1	SinmeB_1157 [Sinorhizobium meliloti BL225C]	1	0	0	0	0	0	0	0	0	0	0	0	0	0	0
AHN28058.1	SALWKB2_0676 [Snodgrassella alvi wkB2]	0	0	1	0	0	0	0	0	0	0	0	0	0	0	0
AFD05219.1	Solca_0061 [Solitalea canadensis DSM 3403]	0	0	0	1	0	0	0	0	0	0	0	0	0	0	0
AFD05220.1	Solca_0062 [Solitalea canadensis DSM 3403]	0	0	0	0	1	0	0	0	0	0	0	0	0	0	1
AFD05451.1	Solca_0308 [Solitalea canadensis DSM 3403]	0	0	0	0	2	0	0	0	0	0	0	0	0	0	0
AFD05455.1	Solca_0312 [Solitalea canadensis DSM 3403]	0	0	2	0	0	0	0	0	0	0	0	0	0	1	0
AFD05457.1	Solca_0314 [Solitalea canadensis DSM 3403]	0	0	0	0	0	0	0	0	0	0	0	0	0	1	0
AFD06157.1	Solca_1050 [Solitalea canadensis DSM 3403]	0	0	1	0	1	0	0	0	0	0	0	0	0	0	1
AFD07788.1	Solca_2759 [Solitalea canadensis DSM 3403]	0	0	0	0	1	0	0	0	0	0	0	0	0	0	0
AFD08420.1	Solca_3413 [Solitalea canadensis DSM 3403]	0	0	1	0	1	0	0	0	0	0	0	0	0	0	0
AFD09354.1	Solca_4364 [Solitalea canadensis DSM 3403]	0	0	0	0	2	0	0	0	0	1	0	0	0	1	0
CAN94455.1	sce4292 [Sorangium cellulosum 'So ce 56']	0	0	0	0	1	0	0	0	0	0	0	0	0	0	0
CAN98729.1	sce8559 [Sorangium cellulosum 'So ce 56']	2	9	0	0	0	0	0	0	0	0	0	0	0	1	0
AGP35806.1	SCE1572_15600 [Sorangium cellulosum So0157-2]	0	1	0	0	0	0	0	0	0	0	0	0	0	0	0
AGP40755.1	SCE1572_43480 [Sorangium cellulosum So0157-2]	0	1	0	1	0	0	0	0	0	0	0	0	0	1	0
AGP40256.1	SCE1572_40565 [Sorangium cellulosum So0157-2]	0	0	0	0	1	0	0	0	0	0	0	0	0	0	0
ADZ79676.1	Sph21_3133 [Sphingobacterium sp. 21]	0	0	0	0	1	0	0	0	0	0	0	0	0	0	0
CDS96817.1	BN1088_1432343 (BglX) [Sphingobacterium sp. PM2-P1-29]	0	0	0	0	1	0	0	0	0	0	0	0	0	0	0
AEG48978.1	Sphch_1289 [Sphingobium chlorophenolicum L-1]	0	1	1	0	0	0	0	0	0	0	0	0	0	0	0
AEG49132.1	Sphch_1443 [Sphingobium chlorophenolicum L-1]	0	17	0	0	0	0	1	1	1	0	0	0	0	2	0
BAI97647.1	SJA_C1-28130 [Sphingobium japonicum UT26S UT26S (= NBRC 101211)]	0	16	2	0	0	0	0	0	0	0	0	0	0	0	0
BAI98613.1	SJA_C2-02500 [Sphingobium japonicum UT26S UT26S (= NBRC 101211)]	0	3	4	0	0	2	0	0	0	0	0	0	1	0	0
BAK65249.1	SLG_05740 (NagZ) [Sphingobium sp. SYK-6]	0	8	3	0	1	0	0	0	0	0	0	0	0	0	0
AHE51783.1	NX02_00070 [Sphingomonas sanxanigenens DSM 19645 = NX02]	0	7	2	0	0	0	2	0	0	0	0	0	0	0	0
AHE52012.1	NX02_01230 [Sphingomonas sanxanigenens DSM 19645 = NX02]	0	0	0	0	1	0	0	0	0	0	0	0	0	0	0
AHE57320.1	NX02_28705 [Sphingomonas sanxanigenens DSM 19645 = NX02]	0	4	2	0	1	0	0	0	1	0	0	1	0	0	0
AGH48825.1	G432_05490 [Sphingomonas sp. MM-1]	0	1	1	0	0	0	1	0	1	0	0	0	0	0	0
AGH49161.1	G432_07180 [Sphingomonas sp. MM-1]	0	1	0	0	1	0	0	0	0	0	0	0	0	0	0
AGH50142.1	G432_12105 [Sphingomonas sp. MM-1]	0	0	1	0	0	0	0	0	0	0	0	0	0	1	0
AGH50143.1	G432_12110 [Sphingomonas sp. MM-1]	0	0	0	0	2	0	0	0	0	0	0	0	0	0	0
AGH51045.1	G432_16635 [Sphingomonas sp. MM-1]	0	5	2	0	0	0	0	0	0	0	0	0	0	0	0
ABQ70278.1	Swit_3933 [Sphingomonas wittichii RW1]	1	16	0	0	0	0	0	0	0	0	0	0	0	0	0
ABF52731.1	Sala_1014 [Sphingopyxis alaskensis RB2256]	0	0	0	0	0	0	0	0	0	0	0	0	0	0	1
ABF52856.1	Sala_1140 [Sphingopyxis alaskensis RB2256]	0	17	1	0	1	0	0	0	0	0	0	0	0	1	0
ABF53224.1	Sala_1511 [Sphingopyxis alaskensis RB2256]	0	5	2	0	1	0	0	1	0	0	0	2	0	1	0
AGY91920.1	SPICUR_04710 [Spiribacter sp. UAH-SP71]	0	0	1	0	0	0	0	0	0	0	0	0	0	0	0
ADN02659.1	STHERM_c17240 [Spirochaeta thermophila DSM 6192]	0	0	0	0	2	0	0	0	0	0	0	0	0	0	0
AEJ61793.1	Spith_1531 [Spirochaeta thermophila DSM 6578]	0	0	0	0	0	0	0	0	0	0	0	1	0	0	0
ADB41359.1	Slin_5392 [Spirosoma linguale DSM 74]	0	0	0	0	0	0	0	0	1	0	0	0	0	0	0
ADB40181.1	Slin_4196 [Spirosoma linguale DSM 74]	1	2	0	0	0	0	0	0	0	0	0	0	0	0	0
ADD45192.1	Snas_5561 [Stackebrandtia nassauensis DSM 44728]	0	0	1	0	0	0	0	0	0	0	0	0	0	0	0
ADH89191.1	Snov_1888 [Starkeya novella DSM 506]	0	0	0	0	0	0	0	1	0	0	0	0	0	0	0
AIL10340.1	DP16_2483 (ExoP) [Stenotrophomonas maltophilia 13637]	0	3	0	0	0	0	0	0	0	0	0	0	0	1	0
CCH12778.1	SMD_2237 [Stenotrophomonas maltophilia D457]	0	4	1	0	0	0	0	1	0	0	0	1	0	1	0
AEM52316.1	BurJV3_2998 [Burkholderia sp. JV3]	0	0	0	0	0	0	0	0	0	0	0	0	0	1	0
CAQ46045.1	Smlt2569 [Stenotrophomonas maltophilia K279a]	1	3	0	0	0	0	0	0	0	0	0	0	0	0	0
AHY58981.1	DX03_09900 [Stenotrophomonas rhizophila DSM14405]	0	5	3	0	0	0	0	0	1	0	0	2	0	0	0
ADO67905.1	STAUR_0096 [Stigmatella aurantiaca DW4/3-1]	0	0	0	0	0	0	0	0	0	0	0	0	0	1	0
ADO69655.1	STAUR_1851 (CelA) [Stigmatella aurantiaca DW4/3-1]	0	0	1	0	1	0	0	0	0	0	0	0	0	0	1
ADO69083.1	STAUR_1279 [Stigmatella aurantiaca DW4/3-1]	0	0	0	0	0	0	0	0	0	0	0	1	0	0	0
ADI13038.1	SBI_09920 [Streptomyces bingchenggensis BCW-1]	0	0	0	0	0	0	0	0	0	0	0	0	0	1	0
AEY87171.1	SHJG_1896 [Streptomyces hygroscopicus subsp. jinggangensis 5008]	0	0	1	0	0	0	0	0	0	0	0	0	0	0	0
AGF61327.1	SHJGH_1661 [Streptomyces hygroscopicus subsp. jinggangensis TL01]	0	0	1	0	0	0	0	0	0	0	0	0	0	0	0
ADW03238.1	Sfla_1803 [Streptomyces flavogriseus ATCC 33331]	0	0	0	0	0	0	1	0	0	0	0	0	0	0	0
AGP52832.1	M271_06030 [Streptomyces rapamycinicus NRRL 5491]	0	0	0	0	0	0	0	0	0	0	0	0	0	1	0
AEM84146.1	Strvi_4539 [Streptomyces violaceusniger Tu 4113]	0	0	2	0	0	0	0	0	0	0	0	0	0	0	0
AEM81301.1	Strvi_1561 [Streptomyces violaceusniger Tu 4113]	0	1	0	0	0	0	0	0	0	0	0	0	0	0	0
ACZ89199.1	Sros_6485 [Streptosporangium roseum DSM 43021]	0	1	0	0	0	0	0	0	0	0	0	0	0	0	0
AEW05735.1	Sulac_2263 [Sulfobacillus acidophilus DSM 10332]	0	0	0	0	0	0	1	0	0	0	0	0	0	0	0
BAN35236.1	SCD_n01410 [Sulfuricella denitrificans skB26]	0	0	1	1	0	0	0	0	0	0	0	0	0	0	0
ADN10061.1	Saut_2018 [Sulfurimonas autotrophica DSM 16294]	0	12	0	0	2	0	0	0	0	0	0	0	0	0	0
ABB36083.1	Syncc9605_2351 [Synechococcus sp. CC9605]	0	0	0	0	0	0	0	0	0	0	0	0	0	0	1
ABB25312.1	Syncc9902_0340 [Synechococcus sp. CC9902]	0	0	0	0	1	0	0	0	0	0	0	0	0	0	0
AII44570.1	KR100_14575 [Synechococcus sp. KORDI-100]	0	0	0	0	1	0	0	0	0	0	0	0	0	0	0
AII46259.1	KR49_07335 [Synechococcus sp. KORDI-49]	0	0	0	0	0	0	0	1	0	0	0	0	0	0	0
AII48387.1	KR52_04355 [Synechococcus sp. KORDI-52]	0	0	0	0	0	0	1	0	0	0	0	0	0	0	0
CAK27183.1	SynRCC307_0280 [Synechococcus sp. RCC307]	0	0	0	0	0	0	0	0	0	1	0	0	0	0	0
CAK24645.1	SynWH7803_2219 [Synechococcus sp. WH 7803]	0	0	0	1	0	0	0	0	0	0	0	0	0	0	0
CAE08723.1	SYNW2208 [Synechococcus sp. WH 8102]	0	0	0	0	3	0	0	0	0	0	0	0	0	0	0
AHF64763.1	Syncc8109_2455 [Synechococcus sp. WH 8109]	0	0	0	0	1	0	0	0	0	0	0	0	0	0	2
AEW19974.1	BFO_2182 [Tannerella forsythia ATCC 43037]	0	0	1	0	0	0	0	0	0	0	0	0	0	0	0
AEW21043.1	BFO_0004 [Tannerella forsythia ATCC 43037]	0	0	0	0	0	0	0	0	0	0	0	0	0	1	0
ACR10686.1	TERTU_3750 [Teredinibacter turnerae T7901]	1	14	2	0	2	0	0	0	0	0	0	0	0	1	0
ACR13094.1	TERTU_4086 [Teredinibacter turnerae T7901]	0	1	0	0	0	0	1	0	0	0	0	0	0	0	1
ACR13814.1	TERTU_3210 [Teredinibacter turnerae T7901]	0	1	0	0	0	0	0	0	0	0	0	0	0	0	0
ACR13744.1	TERTU_1941 [Teredinibacter turnerae T7901]	0	0	3	0	0	0	0	1	0	0	0	0	0	0	0
AIF68005.1	GZ22_16125 [Terribacillus aidingensis MP602]	0	0	0	0	1	0	0	0	0	0	0	0	0	0	0
AFL87582.1	Terro_1273 [Terriglobus roseus DSM 18391]	0	0	0	0	2	0	0	0	0	0	0	0	0	0	0
BAK93825.1	TEH_04980 (BglB) [Tetragenococcus halophilus NBRC 12172]	0	0	0	0	1	0	0	0	0	0	0	0	0	0	0
CCU72492.1	TOL_2083 [Thalassolituus oleivorans MIL-1]	0	0	0	0	0	0	0	1	0	0	0	0	0	0	0
AGA59019.1	Theco_2955 [Thermobacillus composti KWC4]	0	0	0	0	1	0	0	0	0	0	0	0	0	0	0
AGA56630.1	Theco_0409 [Thermobacillus composti KWC4]	0	0	0	0	1	0	0	0	0	0	0	0	0	0	0
AGA57213.1	Theco_1034 [Thermobacillus composti KWC4]	0	0	0	0	0	0	0	0	0	0	0	0	0	1	0
AGA57676.1	Theco_1537 [Thermobacillus composti KWC4]	0	0	1	0	0	0	0	0	0	0	0	0	0	0	0
ACZ43243.1	Tter_2344 [Thermobaculum terrenum ATCC BAA-798]	0	0	2	0	0	0	0	0	0	0	0	0	0	0	0
ADG87507.1	Tbis_0783 [Thermobispora bispora DSM 43833]	0	1	0	0	0	0	0	0	0	0	0	0	0	0	0
ACJ76364.1	THA_1942 [Thermosipho africanus TCF52B]	0	0	0	0	2	0	0	0	0	0	0	0	0	0	0
AAD35119.1	(3.2.1.21) [Thermotoga maritima MSB8]	0	0	0	0	1	0	0	0	0	0	0	0	0	0	0
ADA66225.1	Tnap_0120 [Thermotoga naphthophila RKU-10]	0	0	0	0	1	0	0	0	0	0	0	0	0	0	0
CAB56857.1	beta-mannosidase [Thermotoga neapolitana]	1	0	0	0	0	0	0	0	0	0	0	0	0	0	0
CAB01407.1	beta-glucosidase B / laminaribiase (BglB) (3.2.1.21) [Thermotoga neapolitana Z2706-MC24]	0	0	0	0	1	0	0	0	0	0	0	0	0	0	0
AEH50242.1	beta-xylosidase (XynB3;Theth_0138) (3.2.1.37) [Thermotoga thermarum DSM 5069]	0	0	0	0	1	0	0	0	0	0	0	0	0	0	0
AEG31888.1	Thicy_1121 [Thioalkalimicrobium cyclicum ALM1]	0	0	0	0	1	0	0	0	0	0	0	0	0	0	0
ADC71752.1	TK90_1243 [Thioalkalivibrio sp. K90mix]	0	0	1	0	0	0	0	0	0	0	0	0	0	1	0
AAZ96680.1	Tbd_0727 [Thiobacillus denitrificans ATCC 25259]	0	2	0	0	0	0	0	0	0	0	0	0	0	0	0
ABB41891.1	Tcr_1296 [Thiomicrospira crunogena XCL-2]	1	0	0	0	0	0	0	0	0	0	0	0	1	0	0
AFK53349.1	TMO_1510 (NagZ) [Tistrella mobilis KA081020-065]	0	0	0	0	1	0	0	0	0	0	0	0	0	1	0
AFK55780.1	TMO_a0377 (GluA) [Tistrella mobilis KA081020-065]	0	1	1	0	0	0	0	0	0	0	0	0	0	0	1
ACQ93418.1	Tola_1809 [Tolumonas auensis DSM 9187]	0	0	0	0	0	0	0	0	0	1	0	0	0	0	0
AEF82048.1	TREAZ_2383 [Treponema azotonutricium ZAS-9]	0	0	0	0	0	0	0	0	0	0	0	0	0	1	0
AEJ18761.1	Spica_0603 [Spirochaeta caldaria DSM 7334]	0	0	0	0	1	0	0	0	0	0	0	0	0	0	0
AEF85136.1	TREPR_1329 [Treponema primitia ZAS-2]	0	0	0	0	1	0	0	0	0	0	0	0	0	0	0
ABG52781.1	Tery_3725 (possible fragment) [Trichodesmium erythraeum IMS101]	0	0	0	0	1	0	1	0	0	0	0	0	0	0	0
ADF43753.1	beta-glucosidase (PB16D15) [uncultured bacterium]	0	3	1	0	1	0	0	0	0	0	0	0	0	1	0
AAZ32298.1	beta-glucosidase (UmBgl3A) (3.2.1.21) [uncultured bacterium]	1	0	0	0	0	0	0	0	0	0	0	0	0	0	0
AFH08276.1	BGL4 (Bgl6) [uncultured bacterium]	0	0	1	2	5	0	5	0	0	0	0	0	0	0	0
AFH08278.1	BGL6 (Bgl8) [uncultured bacterium]	0	0	0	0	1	0	0	0	0	0	0	0	0	1	0
AFH08274.1	BGL2 (Bgl2) (partial) [uncultured bacterium]	0	0	0	0	0	0	0	0	0	0	0	1	0	1	0
ABB51613.1	endo-1,4-beta-glucanase (UmBgl3A) [uncultured bacterium]	0	4	4	0	0	0	0	0	1	0	0	1	0	1	1
AFU63316.1	beta-glucosidase [uncultured bacterium]	0	0	0	0	1	0	0	0	0	0	0	0	0	1	0
AFU63317.1	beta-glucosidase [uncultured bacterium]	0	0	0	0	0	0	0	1	0	0	0	0	0	0	0
AHL27902.1	ORF (fragment) [uncultured bacterium]	0	0	0	0	3	0	0	2	0	0	0	1	0	0	0
AID58676.1	beta-glucosidase (fragment) [uncultured bacterium]	1	10	1	0	3	0	0	2	2	0	0	0	0	1	0
AEW47937.1	beta-glucosidase (A1_GH3) (3.2.1.21) [uncultured bacterium A1_9]	0	0	0	0	0	1	0	0	0	0	0	0	0	0	0
AEW47950.1	ORF [uncultured bacterium C2_50]	0	0	0	0	0	0	0	1	0	0	0	0	0	0	1
AIA99571.1	ORF [uncultured bacterium contig00010(2014)]	0	0	1	2	5	0	5	0	0	0	0	0	0	0	0
AIA99588.1	ORF [uncultured bacterium contig00023(2014)]	0	0	0	0	1	0	3	0	0	0	0	0	0	0	0
AIA99602.1	ORF [uncultured bacterium contig00106(2014)]	0	0	0	0	0	0	1	0	0	0	0	0	0	0	0
AIA99610.1	ORF [uncultured bacterium contig00110(2014)]	0	1	0	0	0	0	1	0	0	0	0	0	0	0	0
AHF25022.1	ORF [uncultured bacterium Contig14]	0	0	0	0	1	0	0	0	0	0	0	0	0	0	0
AHF25234.1	ORF [uncultured bacterium Contig90]	0	0	0	0	1	0	0	0	0	0	0	0	0	0	0
AEW47958.1	ORF [uncultured bacterium E2_1]	0	0	1	0	1	0	0	0	0	0	0	0	0	0	0
AGS50307.1	ORF [uncultured bacterium Ele45G2]	0	0	1	0	0	0	0	0	0	0	0	0	0	0	0
AEW47970.1	beta-glucosidase (H1_GH3) (3.2.1.21) [uncultured bacterium H1_5]	0	1	0	0	1	0	0	1	0	0	0	0	0	0	0
AFN84581.1	ORF [uncultured bacterium scaffold00056]	0	0	0	0	0	0	0	0	0	0	0	0	0	1	0
CCF99357.1	S3_BB_A6_0014 [uncultured Cytophagia bacterium]	0	0	0	0	3	0	0	0	0	0	0	0	0	1	0
CBX27165.1	N47_A11940 [uncultured Desulfobacterium sp.]	1	2	0	0	0	0	0	0	0	0	0	0	0	0	0
CCG00655.1	S3_DL_C5_0021 [uncultured Flavobacteriia bacterium]	0	0	0	0	19	0	2	0	0	0	0	0	0	0	1
CCG00861.1	S3_CE_B4_0014 [uncultured Flavobacteriia bacterium]	1	1	1	1	9	1	4	0	0	0	0	0	0	1	1
ADO20356.1	RuXyn3 [uncultured rumen bacterium]	0	0	0	0	1	0	0	0	0	0	0	0	0	0	0
ADU35759.1	Varpa_1548 [Variovorax paradoxus EPS]	0	0	1	0	0	0	0	0	0	0	0	0	0	0	0
ACS22117.1	Vapar_5523 [Variovorax paradoxus S110]	0	0	0	0	0	0	2	0	0	0	0	0	0	0	0
ACZ25449.1	Vpar_1773 [Veillonella parvula DSM 2008]	1	0	0	0	0	0	0	0	0	0	0	0	0	0	0
ABM56720.1	Veis_0942 [Verminephrobacter eiseniae EF01-2]	0	0	0	0	0	0	0	0	0	0	0	0	0	1	0
AEB45886.1	VAB18032_23940 [Verrucosispora maris AB-18-032]	0	0	0	0	0	0	0	1	0	0	0	0	0	0	0
AEH34811.1	VAA_01337 [Vibrio anguillarum 775]	0	1	0	0	0	0	0	0	0	0	0	0	0	0	1
ACP04973.1	VCM66_0650 (ExoII) [Vibrio cholerae M66-2]	0	0	0	0	0	0	0	0	0	0	0	0	0	1	0
ACQ61785.1	VCD_003629 [Vibrio cholerae MJ-1236]	0	0	0	0	1	0	0	0	0	0	0	0	0	0	0
AET25811.1	Vch1786_I0196 (ExoII) [Vibrio cholerae O1 str. 2010EL-1786]	0	0	0	0	0	0	0	0	0	0	0	0	0	1	0
ACH64480.1	VFMJ11_A0540 [Vibrio fischeri MJ11]	0	0	0	0	0	0	0	0	0	0	0	0	0	1	0
CAV17551.1	VS_0546 [Vibrio splendidus LGP32]	0	0	0	0	0	0	1	0	0	0	0	0	0	0	0
AIF44421.1	X953_15670 [Virgibacillus sp. SK37]	0	0	0	0	0	0	0	0	0	0	0	0	0	2	0
BAO77245.1	WPG_3015 [Winogradskyella sp. PG-2]	0	0	1	1	5	1	1	3	0	0	0	1	0	1	3
BAO76539.1	WPG_2309 [Winogradskyella sp. PG-2]	0	0	0	0	4	0	0	0	0	1	0	0	0	0	0
ABS69632.1	Xaut_4411 [Xanthobacter autotrophicus Py2]	0	0	0	0	1	0	0	0	0	0	0	0	0	0	0
CBA15719.1	XALc_1209 [Xanthomonas albilineans GPE PC73]	1	2	5	0	2	0	0	1	0	0	0	0	0	0	1
AGH77285.1	XAC29_09005 [Xanthomonas axonopodis Xac29-1]	0	0	0	0	0	0	0	0	0	0	0	0	0	1	0
AAY49511.1	XC_2461 [Xanthomonas campestris pv. campestris str. 8004]	0	1	0	0	0	0	0	0	0	0	0	0	0	0	0
AAM41065.1	CelD [Xanthomonas campestris pv. campestris str. ATCC 33913]	0	0	2	0	0	0	0	0	0	0	0	0	0	0	0
AAM43327.1	XCC4106 [Xanthomonas campestris pv. campestris str. ATCC 33913]	0	0	0	0	1	0	0	0	0	0	0	0	0	0	0
AEL06905.1	XCR_2017 [Xanthomonas campestris pv. raphani 756C]	0	2	0	0	0	0	0	0	0	0	0	0	0	0	0
CAJ23017.1	XCV1386 [Xanthomonas campestris pv. vesicatoria str. 85-10]	0	1	0	0	0	0	0	0	0	0	0	0	0	0	0
AAW75610.1	XOO2356 (CelD;BglXoD) [Xanthomonas oryzae pv. oryzae KACC10331]	0	0	0	0	1	0	0	0	0	0	0	0	0	0	1
ACD58811.1	PXO_00680 [Xanthomonas oryzae pv. oryzae PXO99A]	0	0	0	0	0	0	0	0	0	0	0	0	0	1	0
AEQ96316.1	XOC_2177 [Xanthomonas oryzae pv. oryzicola BLS256]	0	0	0	1	0	0	0	0	0	0	0	0	0	0	0
AIC11850.1	P303_00710 [Xylella fastidiosa MUL0034]	0	0	0	0	1	0	0	0	0	0	0	0	0	0	0
CAZ97858.1	zobellia_3720 [Zobellia galactanivorans DsiJT]	0	0	1	0	0	0	0	0	0	0	0	0	0	0	0
CAZ94420.1	zobellia_347 (Xarb2) [Zobellia galactanivorans DsiJT]	3	2	1	0	0	1	0	0	0	0	0	0	0	0	0
CAZ97883.1	zobellia_3745 [Zobellia galactanivorans DsiJT]	3	22	0	0	2	0	1	0	1	0	0	0	0	0	2
ADF51368.1	ZPR_1023 [Zunongwangia profunda SM-A87 SMA-87]	0	0	0	0	1	0	0	0	0	0	0	0	0	0	0
ADF51937.1	ZPR_1602 [Zunongwangia profunda SM-A87 SMA-87]	0	0	0	0	1	0	0	0	0	0	0	0	0	0	0
ADF53059.1	ZPR_2737 [Zunongwangia profunda SM-A87 SMA-87]	6	20	1	0	8	1	4	1	1	0	0	0	1	0	2
ADF53355.1	ZPR_3036 [Zunongwangia profunda SM-A87 SMA-87]	0	0	0	0	0	0	2	0	0	0	0	0	0	0	0
ADF53818.1	ZPR_3503 [Zunongwangia profunda SM-A87 SMA-87]	0	0	0	0	0	0	0	1	0	0	0	0	0	0	0
ADF54000.1	ZPR_3690 [Zunongwangia profunda SM-A87 SMA-87]	0	0	0	0	1	0	0	0	0	0	0	0	0	0	0
ADF54995.1	ZPR_4696 [Zunongwangia profunda SM-A87 SMA-87]	0	0	1	0	5	0	0	0	0	0	0	0	0	0	0
ADF54697.1	ZPR_4395 [Zunongwangia profunda SM-A87 SMA-87]	0	0	0	0	0	0	0	1	0	0	0	0	0	1	0
AEH62011.1	Zmob_0158 [Zymomonas mobilis subsp. mobilis ATCC 10988 ATCC10988]	0	16	1	0	0	0	0	0	0	0	0	0	0	0	0
AFN56064.1	ZZ6_0160 [Zymomonas mobilis subsp. mobilis ATCC 29191]	1	2	0	0	0	0	0	0	1	0	0	0	0	0	1
ACV74711.1	Za10_0157 [Zymomonas mobilis subsp. mobilis NCIB 11163]	0	4	0	0	2	0	0	0	0	0	0	0	0	0	0
AHJ69802.1	A254_00162 [Zymomonas mobilis subsp. mobilis NRRL B-12526]	1	0	0	0	1	0	0	0	0	0	0	0	0	0	0
AHB09496.1	ZCP4_0162 [Zymomonas mobilis subsp. mobilis str. CP4 = NRRL B-14023]	0	0	0	0	1	0	0	0	1	0	0	0	0	0	0
AAV89795.1	ZMO1171 [Zymomonas mobilis subsp. mobilis ZM4]	0	7	0	0	0	0	0	0	0	0	0	0	0	0	1
AEI37034.1	Zymop_0130 [Zymomonas mobilis subsp. pomaceae ATCC 29192]	0	0	0	0	3	0	0	0	0	0	0	0	0	0	0
Eukaryota		7	34	24	9	55	1	21	9	5	3	0	7	0	16	8
CDS12545.1	LRAMOSA04739 [Absidia idahoensis var. thermophila]	0	0	0	0	1	0	0	0	0	0	0	0	0	0	0
CDS09677.1	LRAMOSA02354 [Absidia idahoensis var. thermophila]	0	0	0	0	1	0	0	0	0	0	0	0	0	0	0
CAC03462.1	Bg1 [Agaricus bisporus D649]	0	0	0	0	0	0	0	0	0	0	0	0	0	0	1
CCA27737.1	ALNC14_138810 [Albugo laibachii Nc14]	0	0	1	0	0	0	0	0	0	0	0	0	0	0	0
EAA65189.1	beta-glucosidase (AN0712.2) (3.2.1.21) [Aspergillus nidulans FGSC A4]	0	0	0	0	0	0	0	0	0	0	0	0	0	1	0
CAK97412.1	An17g00520 (probable fragment) [Aspergillus niger CBS 513.88]	0	0	0	0	1	0	0	0	0	0	0	0	0	0	0
BAE59617.1	AO090026000123 [Aspergillus oryzae RIB40]	0	0	0	0	0	0	1	0	0	0	0	0	0	0	0
BAE60251.1	AO090012000003 [Aspergillus oryzae RIB40]	7	32	17	7	35	1	12	8	5	1	0	5	0	13	2
CCD43225.1	glycoside hydrolase family 3 protein (Bofut4_p013340.1) [Botryotinia fuckeliana]	0	0	0	0	1	0	0	0	0	0	0	0	0	0	0
ACD93208.1	beta-xylosidase [Camellia sinensis]	0	0	0	0	0	0	0	0	0	0	0	1	0	0	0
AGM32622.1	ORF (fragment) [Coptotermes formosanus]	0	0	0	0	0	0	0	0	0	0	0	0	0	1	0
AFU73925.1	beta-glucosidase B [Crithidia mellificae SF]	0	0	1	0	0	0	0	0	0	0	0	1	0	0	0
CDR47499.1	CYFA0S_32e01002g [Cyberlindnera fabianii YJS4271]	0	0	0	0	0	0	1	0	0	0	0	0	0	0	0
AAA74233.1	beta-glucosidase (3.2.1.21) [Dictyostelium discoideum AX3]	0	0	1	0	0	0	0	0	0	0	0	0	0	0	0
CCT62926.1	FFUJ_00469 [Fusarium fujikuroi IMI 58289]	0	0	0	0	0	0	1	0	0	0	0	0	0	0	0
CCT69025.1	FFUJ_07959 [Fusarium fujikuroi IMI 58289]	0	0	0	0	0	0	0	0	0	0	0	0	0	0	1
CCT74517.1	FFUJ_10572 [Fusarium fujikuroi IMI 58289]	0	0	0	0	0	0	0	1	0	0	0	0	0	0	0
CCT64822.1	FFUJ_03922 [Fusarium fujikuroi IMI 58289]	0	0	0	0	0	0	0	0	0	0	0	0	0	1	0
BAD13764.1	exo-1,3-beta-glucanase (LP-ExoII) [Lilium longiflorum]	0	0	0	0	0	0	1	0	0	0	0	0	0	0	0
AAR14129.1	exo-beta-glucanase (ExoI) [Lilium longiflorum]	0	0	0	0	0	0	0	0	0	0	0	0	0	0	1
XP_365193.1	MG10038.4 [Magnaporthe grisea 70-15]	0	0	1	0	0	0	0	0	0	0	0	0	0	0	0
XP_365947.1	MG10167.4 [Magnaporthe grisea 70-15]	0	0	0	0	2	0	0	0	0	0	0	0	0	0	0
ACO63481.1	MICPUN_58752 [Micromonas sp. RCC299]	0	0	0	0	1	0	0	0	0	0	0	0	0	0	0
CCA66712.1	PIIN_00392 [Piriformospora indica]	0	0	1	0	0	0	0	0	0	0	0	0	0	0	0
CCA72399.1	PIIN_06333 [Piriformospora indica]	0	0	0	0	1	0	0	0	0	0	0	0	0	0	1
ABL67526.1	beta-glucosidase [Rhizoctonia solani AG3]	0	0	0	0	0	0	1	0	0	0	0	0	0	0	0
AGC24356.1	beta-N-acetylglucosaminidase (Nag;RmNag) (3.2.1.52) [Rhizomucor miehei CAU432]	0	1	0	0	0	0	0	0	0	0	0	0	0	0	0
ABN65244.1	PICST_41452 [Pichia stipitis CBS 6054]	0	0	0	0	1	0	0	0	0	0	0	0	0	0	0
CAB91166.1	beta-glucosidase (SPBC1683.04) (3.2.1.21) [Schizosaccharomyces pombe 972h-]	0	0	0	0	0	0	0	0	0	1	0	0	0	0	0
AAP57756.1	[Trichoderma reesei QM6A]	0	0	0	0	1	0	0	0	0	0	0	0	0	0	0
CAW52652.1	unnamed protein product [Triticum aestivum]	0	0	0	0	1	0	0	0	0	0	0	0	0	0	0
CAA07070.1	beta-glucosidase (3.2.1.21) [Tropaeolum majus]	0	0	0	0	0	0	1	0	0	0	0	0	0	0	0
AAQ97669.1	beta-glucanase (Gla3) [Zea mays]	0	0	0	1	0	0	0	0	0	0	0	0	0	0	0
ACL52582.1	unknown [Zea mays B73]	0	0	0	0	1	0	0	0	0	0	0	0	0	0	0
BAD13764.1	exo-1,3-beta-glucanase (LP-ExoII) [Lilium longiflorum]	0	0	0	0	0	0	1	0	0	0	0	0	0	0	0
AAR14129.1	exo-beta-glucanase (ExoI) [Lilium longiflorum]	0	0	0	0	0	0	0	0	0	0	0	0	0	0	1
XP_365193.1	MG10038.4 [Magnaporthe grisea 70-15]	0	0	1	0	0	0	0	0	0	0	0	0	0	0	0
XP_365947.1	MG10167.4 [Magnaporthe grisea 70-15]	0	0	0	0	2	0	0	0	0	0	0	0	0	0	0
ACO63481.1	MICPUN_58752 [Micromonas sp. RCC299]	0	0	0	0	1	0	0	0	0	0	0	0	0	0	0
CCA66712.1	PIIN_00392 [Piriformospora indica]	0	0	1	0	0	0	0	0	0	0	0	0	0	0	0
CCA72399.1	PIIN_06333 [Piriformospora indica]	0	0	0	0	1	0	0	0	0	0	0	0	0	0	1
ABL67526.1	beta-glucosidase [Rhizoctonia solani AG3]	0	0	0	0	0	0	1	0	0	0	0	0	0	0	0
AGC24356.1	beta-N-acetylglucosaminidase (Nag;RmNag) (3.2.1.52) [Rhizomucor miehei CAU432]	0	1	0	0	0	0	0	0	0	0	0	0	0	0	0
ABN65244.1	PICST_41452 [Pichia stipitis CBS 6054]	0	0	0	0	1	0	0	0	0	0	0	0	0	0	0
CAB91166.1	beta-glucosidase (SPBC1683.04) (3.2.1.21) [Schizosaccharomyces pombe 972h-]	0	0	0	0	0	0	0	0	0	1	0	0	0	0	0
AAP57756.1	[Trichoderma reesei QM6A]	0	0	0	0	1	0	0	0	0	0	0	0	0	0	0
CAW52652.1	unnamed protein product [Triticum aestivum]	0	0	0	0	1	0	0	0	0	0	0	0	0	0	0
CAA07070.1	beta-glucosidase (3.2.1.21) [Tropaeolum majus]	0	0	0	0	0	0	1	0	0	0	0	0	0	0	0
AAQ97669.1	beta-glucanase (Gla3) [Zea mays]	0	0	0	1	0	0	0	0	0	0	0	0	0	0	0
ACL52582.1	unknown [Zea mays B73]	0	0	0	0	1	0	0	0	0	0	0	0	0	0	0
unclassified		4	6	6	0	16	0	6	0	4	0	0	0	8	6	2
CCO21532.1	BN138_720 [termite gut metagenome]	0	0	0	0	1	0	0	0	0	0	0	0	0	0	0
CCO21555.1	BN138_743 [termite gut metagenome]	0	0	0	0	1	0	0	0	0	0	0	0	0	0	0
CCO21439.1	BN138_627 (fragment) [termite gut metagenome]	0	0	0	0	1	0	0	0	0	0	0	0	0	0	0
CCO21492.1	BN138_680 (fragment) [termite gut metagenome]	0	0	0	0	0	0	1	0	0	0	0	0	0	0	0
CCO21743.1	BN138_931 (fragment) [termite gut metagenome]	0	0	0	0	1	0	0	0	0	0	0	0	0	0	0
CCO21771.1	BN138_959 (fragment) [termite gut metagenome]	0	0	0	0	0	0	0	0	0	0	0	0	0	0	1
ABZ06719.1	ALOHA_HF4000141E02ctg1g21 [uncultured marine microorganism HF4000_141E02]	1	0	0	0	0	0	0	0	1	0	0	0	0	1	0
ADB80109.1	[uncultured microorganism]	0	0	2	0	0	0	0	0	0	0	0	0	0	0	0
ADR64671.1	BT-09 [uncultured microorganism]	0	0	0	0	0	0	1	0	0	0	0	0	0	0	0
AHI07416.1	ORF [uncultured microorganism]	0	0	0	0	1	0	0	0	0	0	0	0	0	0	0
ADD62001.1	beta-glucanase [uncultured organism]	0	0	0	0	1	0	0	0	0	0	0	0	0	0	0
ADX05682.1	SARM_0011 / 3871318_57040 / TX-9 [uncultured organism]	0	0	0	0	0	0	0	0	0	0	0	0	1	0	0
ADX05689.1	SARM_0018 / 4178865_28470 / TW-53 (fragment) [uncultured organism]	0	0	0	0	0	0	1	0	0	0	0	0	0	0	0
AGU10256.1	ORF [uncultured organism]	0	0	0	0	0	0	0	0	0	0	0	0	1	0	0
AGU11727.1	ORF [uncultured organism]	1	0	0	0	0	0	0	0	0	0	0	0	0	0	0
AGU11871.1	ORF [uncultured organism]	0	2	0	0	0	0	0	0	1	0	0	0	2	1	0
AGU12233.1	ORF [uncultured organism]	0	0	0	0	1	0	0	0	0	0	0	0	0	0	0
AGU09821.1	ORF [uncultured organism]	0	0	0	0	0	0	0	0	0	0	0	0	0	1	0
AGU12141.1	ORF [uncultured organism]	0	0	0	0	1	0	0	0	0	0	0	0	0	0	0
ACM94274.1	Sequence 44 from patent US 7465571. [unidentified]	0	1	0	0	0	0	0	0	0	0	0	0	0	0	0
ABX76051.1	beta-glucosidase (UmCelS19;Sb1) (3.2.1.21) [unidentified microorganism]	0	0	1	0	0	0	0	0	0	0	0	0	0	0	0
CCO21532.1	BN138_720 [termite gut metagenome]	0	0	0	0	1	0	0	0	0	0	0	0	0	0	0
CCO21555.1	BN138_743 [termite gut metagenome]	0	0	0	0	1	0	0	0	0	0	0	0	0	0	0
CCO21439.1	BN138_627 (fragment) [termite gut metagenome]	0	0	0	0	1	0	0	0	0	0	0	0	0	0	0
CCO21492.1	BN138_680 (fragment) [termite gut metagenome]	0	0	0	0	0	0	1	0	0	0	0	0	0	0	0
CCO21743.1	BN138_931 (fragment) [termite gut metagenome]	0	0	0	0	1	0	0	0	0	0	0	0	0	0	0
CCO21771.1	BN138_959 (fragment) [termite gut metagenome]	0	0	0	0	0	0	0	0	0	0	0	0	0	0	1
ABZ06719.1	ALOHA_HF4000141E02ctg1g21 [uncultured marine microorganism HF4000_141E02]	1	0	0	0	0	0	0	0	1	0	0	0	0	1	0
ADB80109.1	[uncultured microorganism]	0	0	2	0	0	0	0	0	0	0	0	0	0	0	0
ADR64671.1	BT-09 [uncultured microorganism]	0	0	0	0	0	0	1	0	0	0	0	0	0	0	0
AHI07416.1	ORF [uncultured microorganism]	0	0	0	0	1	0	0	0	0	0	0	0	0	0	0
ADD62001.1	beta-glucanase [uncultured organism]	0	0	0	0	1	0	0	0	0	0	0	0	0	0	0
ADX05682.1	SARM_0011 / 3871318_57040 / TX-9 [uncultured organism]	0	0	0	0	0	0	0	0	0	0	0	0	1	0	0
ADX05689.1	SARM_0018 / 4178865_28470 / TW-53 (fragment) [uncultured organism]	0	0	0	0	0	0	1	0	0	0	0	0	0	0	0
AGU10256.1	ORF [uncultured organism]	0	0	0	0	0	0	0	0	0	0	0	0	1	0	0
AGU11727.1	ORF [uncultured organism]	1	0	0	0	0	0	0	0	0	0	0	0	0	0	0
AGU11871.1	ORF [uncultured organism]	0	2	0	0	0	0	0	0	1	0	0	0	2	1	0
AGU12233.1	ORF [uncultured organism]	0	0	0	0	1	0	0	0	0	0	0	0	0	0	0
AGU09821.1	ORF [uncultured organism]	0	0	0	0	0	0	0	0	0	0	0	0	0	1	0
AGU12141.1	ORF [uncultured organism]	0	0	0	0	1	0	0	0	0	0	0	0	0	0	0
ACM94274.1	Sequence 44 from patent US 7465571. [unidentified]	0	1	0	0	0	0	0	0	0	0	0	0	0	0	0
ABX76051.1	beta-glucosidase (UmCelS19;Sb1) (3.2.1.21) [unidentified microorganism]	0	0	1	0	0	0	0	0	0	0	0	0	0	0	0
GH4		10	43	87	4	35	1	16	19	2	3	1	15	18	54	14
Bacteria		10	43	87	4	35	1	16	19	2	3	1	15	18	54	14
ACM38294.1	Avi_5115 (MelA) [Agrobacterium vitis S4]	0	0	0	0	1	0	1	0	0	0	0	0	0	0	0
AFS48749.1	HIMB59_00005490 [alpha proteobacterium HIMB59]	0	0	0	0	1	0	0	0	0	0	0	0	0	0	1
CCD02237.1	AZOBR_p280123 (MelA) [Azospirillum brasilense Sp245]	0	0	0	0	0	0	1	0	0	0	0	0	0	0	0
AGK13702.1	AvCA_51420 (MelA) [Azotobacter vinelandii CA]	0	0	1	0	0	0	0	0	0	0	0	0	0	0	0
AGK18264.1	AvCA6_51420 (MelA) [Azotobacter vinelandii CA6]	0	0	0	0	0	0	1	0	0	0	0	0	0	0	0
ACO81220.1	Avin_51420 (MelA) [Azotobacter vinelandii DJ ATCC BAA-1303]	0	1	1	0	0	0	0	0	0	0	0	0	0	0	0
AIC95855.1	BleG1_3308 [Bacillus lehensis G1]	0	0	0	0	1	0	0	0	0	0	0	0	0	0	0
AGN35637.1	BaLi_c12680 (MelA) [Bacillus licheniformis 9945A]	0	0	0	0	0	0	0	1	0	0	0	0	0	1	0
AHL71627.1	BW16_09605 [Bacillus pumilus MTCC B6033]	0	0	0	0	1	0	0	0	0	0	0	0	0	0	0
BAL98933.1	CLDAP_08940 [Caldilinea aerophila DSM 14535 = NBRC 104270]	0	0	2	0	1	0	0	0	0	0	0	0	0	0	0
ADE39439.1	SAR116_1196 [alpha proteobacterium IMCC1322]	0	0	0	0	1	0	0	0	0	0	0	0	0	0	0
ADL02957.1	Closa_0319 [Clostridium saccharolyticum WM1]	1	0	0	0	0	0	0	0	0	0	0	0	0	0	0
AEY68140.1	Clo1100_4039 [Clostridium sp. BNL1100]	0	0	1	0	0	0	0	0	0	0	0	0	0	0	0
ADB53297.1	Cwoe_4885 [Conexibacter woesei DSM 14684]	0	0	0	0	0	0	0	0	0	0	0	0	0	0	1
AFZ66893.1	Deipe_1344 [Deinococcus peraridilitoris DSM 19664]	0	0	2	0	0	0	0	0	0	0	0	0	0	0	0
ABV92987.1	Dshi_1245 [Dinoroseobacter shibae DFL 12]	1	4	0	0	2	0	1	0	0	0	0	0	0	0	0
ACR68956.1	NT01EI_1777 [Edwardsiella ictaluri 93-146]	0	0	0	0	1	0	0	0	0	0	0	0	0	0	0
AFG42634.1	P12B_c3817 (frameshift) [Escherichia coli P12b]	0	0	0	0	0	0	0	0	0	0	1	1	0	0	0
AIE83414.1	OP10G_0046 [Fimbriimonas ginsengisoli Gsoil 348]	0	0	1	0	0	0	0	0	0	0	0	0	0	0	0
AIE87797.1	OP10G_4429 [Fimbriimonas ginsengisoli Gsoil 348]	0	0	2	0	0	0	0	0	0	0	0	0	0	1	0
AGB42393.1	Halha_2519 [Halobacteroides halobius DSM 5150]	0	0	0	0	0	1	0	0	0	0	0	0	0	0	0
AIG84012.1	Q770_17515 [Klebsiella pneumoniae subsp. pneumoniae PittNDM01]	0	0	0	0	1	0	0	0	0	0	0	0	0	0	0
ACB35497.1	Lcho_3239 [Leptothrix cholodnii SP-6]	0	0	1	0	0	0	0	0	0	0	0	0	0	1	0
EAR01386.1	FB2170_11716 [Flavobacteriales bacterium HTCC2170]	0	0	0	1	1	0	2	0	0	1	0	0	0	0	0
ADH65003.1	Mesil_3180 [Meiothermus silvanus DSM 9946]	0	0	2	0	0	0	0	0	0	0	0	0	0	0	0
AGB44821.1	Mesau_02392 [Mesorhizobium australicum WSM2073]	1	0	0	0	0	0	0	0	0	0	0	0	0	0	0
CDN52311.1	RG540_PA16350 [Rhizobium galegae bv. orientalis str. HAMBI 540]	1	0	0	0	0	0	0	0	0	0	0	0	0	0	0
AET61096.1	HPL003_21840 [Paenibacillus terrae HPL-003]	0	0	0	0	1	0	0	0	0	0	0	0	0	0	1
AFE58891.1	Q7S_13360 [Rahnella aquatilis HX2]	0	0	0	0	0	0	1	0	0	0	0	0	0	0	0
AGJ88069.1	RORB6_16940 [Raoultella ornithinolytica B6]	0	0	0	1	0	0	0	0	0	0	0	0	0	0	0
ACS59571.1	Rleg_5368 [Rhizobium leguminosarum bv. trifolii WSM1325]	1	0	0	0	0	0	0	0	0	0	0	0	0	0	0
ACI59074.1	Rleg2_5903 [Rhizobium leguminosarum bv. trifolii WSM2304]	0	0	0	0	0	0	0	0	0	0	0	0	0	1	0
CAK11968.1	pRL120256 [Rhizobium leguminosarum bv. viciae 3841]	0	0	0	0	1	0	1	0	0	0	0	0	0	0	0
CDI11545.1	BN877_II1760 (Mela2) [Rhizobium sp. IRBG74]	0	0	0	0	1	0	1	0	0	0	0	0	0	0	1
CDM63213.1	LPU83_pLPU83d_1843 (Mela1) [Rhizobium sp. LPU83]	1	0	0	0	0	0	1	0	0	0	0	0	0	2	0
CBL20182.1	CK1_21840 [Ruminococcus sp. SR1/5]	0	0	0	0	1	0	0	0	0	0	0	0	0	0	0
ADY12271.1	SpiBuddy_0436 [Spirochaeta sp. Buddy]	0	0	0	0	1	0	0	0	0	0	0	0	0	0	0
ADK80362.1	Spirs_1235 [Spirochaeta smaragdinae DSM 11293]	0	0	0	0	1	0	0	0	0	0	0	0	0	0	0
AEJ40202.1	TPY_2022 (MelA) [Sulfobacillus acidophilus TPY]	0	0	0	0	1	0	0	0	0	0	0	0	0	0	0
BAK95421.1	TEH_20950 + TEH_20940 [Tetragenococcus halophilus NBRC 12172]	0	0	0	0	0	0	1	0	0	0	0	0	0	0	0
ACZ43505.1	Tter_2617 [Thermobaculum terrenum ATCC BAA-798]	0	0	0	0	1	0	0	0	0	0	0	0	0	0	0
ACZ41059.1	Tter_0137 [Thermobaculum terrenum ATCC BAA-798]	0	0	2	0	0	0	0	1	0	0	0	0	0	0	0
ACQ93723.1	Tola_2124 [Tolumonas auensis DSM 9187]	1	0	0	0	1	0	0	0	1	0	0	0	0	0	0
AEE15500.1	Trebr_0042 [Treponema brennaborense DSM 12168]	1	2	0	0	0	0	0	0	0	0	0	0	0	0	0
ADI15093.1	Trad_1979 [Truepera radiovictrix DSM 17093]	0	0	2	0	0	0	0	0	0	0	0	0	0	0	1
ACX49739.1	ORF [uncultured marine bacterium 1n22]	0	17	33	1	2	0	2	8	0	0	0	7	9	24	4
AAR38348.1	EBAC080-L028H02.10 [uncultured marine bacterium 582]	0	0	0	0	3	0	0	0	0	1	0	0	0	0	0
ADY12271.1	SpiBuddy_0436 [Spirochaeta sp. Buddy]	0	0	0	0	1	0	0	0	0	0	0	0	0	0	0
ADK80362.1	Spirs_1235 [Spirochaeta smaragdinae DSM 11293]	0	0	0	0	1	0	0	0	0	0	0	0	0	0	0
AEJ40202.1	TPY_2022 (MelA) [Sulfobacillus acidophilus TPY]	0	0	0	0	1	0	0	0	0	0	0	0	0	0	0
BAK95421.1	TEH_20950 + TEH_20940 [Tetragenococcus halophilus NBRC 12172]	0	0	0	0	0	0	1	0	0	0	0	0	0	0	0
ACZ43505.1	Tter_2617 [Thermobaculum terrenum ATCC BAA-798]	0	0	0	0	1	0	0	0	0	0	0	0	0	0	0
ACZ41059.1	Tter_0137 [Thermobaculum terrenum ATCC BAA-798]	0	0	2	0	0	0	0	1	0	0	0	0	0	0	0
ACQ93723.1	Tola_2124 [Tolumonas auensis DSM 9187]	1	0	0	0	1	0	0	0	1	0	0	0	0	0	0
AEE15500.1	Trebr_0042 [Treponema brennaborense DSM 12168]	1	2	0	0	0	0	0	0	0	0	0	0	0	0	0
ADI15093.1	Trad_1979 [Truepera radiovictrix DSM 17093]	0	0	2	0	0	0	0	0	0	0	0	0	0	0	1
ACX49739.1	ORF [uncultured marine bacterium 1n22]	0	17	33	1	2	0	2	8	0	0	0	7	9	24	4
AAR38348.1	EBAC080-L028H02.10 [uncultured marine bacterium 582]	0	0	0	0	3	0	0	0	0	1	0	0	0	0	0
GH5		91	944	158	8	164	15	24	34	22	10	0	29	29	80	21
GH5_1		1	36	13	1	19	0	2	7	0	0	0	1	4	8	2
Bacteria		1	36	13	1	19	0	2	7	0	0	0	1	4	8	2
AAA75477.1	(3.2.1.4) [Acidothermus cellulolyticus 11B ATCC 43068]	0	0	1	0	0	0	0	0	0	0	0	0	0	0	0
ABM32683.1	Aave_2102 [Acidovorax avenae subsp. citrulli AAC00-1]	0	0	0	0	0	0	1	0	0	0	0	0	0	0	0
AEC53450.1	asmnew07 [Actinosynnema pretiosum subsp. auranticum ATCC 31565]	0	0	0	0	1	0	0	0	0	0	0	0	0	0	0
BAF87299.1	endo-beta-1,4-glucanase (Egl;AZC_1301) (3.2.1.4) [Azorhizobium caulinodans ORS 571]	0	16	7	1	8	0	1	2	0	0	0	0	2	4	1
AIB14334.1	ABAZ39_20660 [Azospirillum brasilense Az39]	0	0	1	0	0	0	0	1	0	0	0	0	0	0	0
CCD00695.1	AZOBR_p1110164 [Azospirillum brasilense Sp245]	0	0	0	0	0	0	0	1	0	0	0	0	0	0	0
CBS88800.1	AZOLI_p10561 [Azospirillum lipoferum 4B]	0	0	1	0	0	0	0	1	0	0	0	0	0	0	0
CBS90502.1	AZOLI_p40099 [Azospirillum lipoferum 4B]	0	1	0	0	0	0	0	0	0	0	0	0	0	0	0
BAI74220.1	AZL_a06890 [Azospirillum sp. B510]	0	0	0	0	1	0	0	0	0	0	0	0	0	0	0
AEL31247.1	endoglucanase Cel5B [bacterium enrichment culture clone FXVII-Cel5B]	0	0	0	0	0	0	0	0	0	0	0	0	0	1	0
AAA23089.1	(3.2.1.4) [Cellulomonas fimi ATCC 484]	0	2	0	0	0	0	0	0	0	0	0	0	0	0	0
AFZ54640.1	Cyan10605_2560 [Cyanobacterium aponinum PCC 10605]	0	0	0	0	1	0	0	0	0	0	0	0	0	0	0
ABX05458.1	cellulase (H4;Haur_2820) [Herpetosiphon aurantiacus ATCC 23779]	0	1	0	0	0	0	0	0	0	0	0	0	0	0	0
ABP45478.1	Mflv_3001 [Mycobacterium gilvum PYR-GCK]	1	3	0	0	1	0	0	0	0	0	0	0	0	0	0
ADT98979.1	Mspyr1_23340 [Mycobacterium sp. Spyr1]	0	9	2	0	1	0	0	0	0	0	0	0	0	2	0
ABM14300.1	Mvan_3505 [Mycobacterium vanbaalenii PYR-1]	0	4	0	0	6	0	0	2	0	0	0	1	0	1	0
ADM71278.1	PPE_03461 [Paenibacillus polymyxa E681]	0	0	0	0	0	0	0	0	0	0	0	0	0	0	1
CAA49187.1	(3.2.1.4) [Ruminiclostridium thermocellum NCIB 10682]	0	0	0	0	0	0	0	0	0	0	0	0	1	0	0
AEJ62365.1	Spith_2109 [Spirochaeta thermophila DSM 6578]	0	0	0	0	0	0	0	0	0	0	0	0	1	0	0
AAZ56745.1	(3.2.1.4) [Thermobifida fusca YX]	0	0	1	0	0	0	0	0	0	0	0	0	0	0	0
GH5_2		1	116	50	0	8	2	0	9	2	0	0	4	13	30	3
Bacteria		1	90	35	0	8	2	0	9	2	0	0	0	10	28	3
AAC06196.1	endo-beta-1,4-glucanase (3.2.1.4) [Actinomyces sp. 40]	0	5	0	0	0	0	0	1	0	0	0	0	0	0	0
BAL90501.1	AMIS_52810 [Actinoplanes missouriensis 431]	0	1	0	0	0	0	0	0	0	0	0	0	0	0	0
AEV87062.1	ACPL_6177 (BglC) [Actinoplanes sp. SE50/110]	0	0	0	0	0	0	0	0	0	0	0	0	0	1	0
AGW99981.1	endo-beta-1,4-glucanase [Bacillus megaterium IARI-SP-9]	0	0	0	0	0	0	0	1	0	0	0	0	0	0	0
ACR23656.1	cellulase (CelA10) (3.2.1.4) [bacterium enrichment culture clone CelA10]	0	0	0	0	0	0	0	0	0	0	0	0	0	1	0
CBK67187.1	BXY_21090 [Bacteroides xylanisolvens XB1A]	0	1	0	0	0	0	0	0	0	0	0	0	0	0	0
AGH41463.1	D805_1196 [Bifidobacterium thermophilum RBL67]	0	3	0	0	0	0	0	0	0	0	0	0	0	0	0
ADV51156.1	Celal_3912 [Cellulophaga algicola DSM 14237]	0	1	0	0	0	0	0	1	0	0	0	0	1	2	0
ADY28104.1	Celly_0269 [Cellulophaga lytica DSM 7489]	0	1	1	0	0	0	0	0	0	0	0	0	0	0	0
ADY28795.1	Celly_0965 [Cellulophaga lytica DSM 7489]	0	3	3	0	0	0	0	1	0	0	0	0	4	3	0
ACE84076.1	(3.2.1.4) [Cellvibrio japonicus Ueda107]	1	0	1	0	0	0	0	0	0	0	0	0	0	1	0
AAB61462.2	(3.2.1.4) [Cellvibrio mixtus ATCC 12120]	0	0	2	0	0	0	0	0	0	0	0	0	0	0	0
ACU59504.1	Cpin_2009 [Chitinophaga pinensis DSM 2588]	0	0	0	0	0	0	0	0	0	0	0	0	0	0	1
CBK83877.1	CCU_25500 [Coprococcus sp. ART55/1]	0	3	0	0	0	0	0	0	0	0	0	0	0	0	0
ABG58383.1	(3.2.1.4) [Cytophaga hutchinsonii ATCC 33406]	0	2	0	0	1	0	0	0	0	0	0	0	0	0	0
ABG59366.1	processive endoglucanase (CHU_2103) (3.2.1.4) [Cytophaga hutchinsonii ATCC 33406]	0	1	0	0	0	0	0	0	0	0	0	0	0	0	0
ACS85678.1	Dd703_1886 [Dickeya dadantii Ech703]	0	0	1	0	0	0	0	0	0	0	0	0	0	1	0
ACT06384.1	Dd1591_1529 [Dickeya zeae Ech1591]	0	1	0	0	0	0	0	0	0	0	0	0	0	0	0
AAF18152.1	endo-beta-1,4-glucanase (Cel5Z) (3.2.1.4) [Erwinia chrysanthemi PY35]	0	0	1	0	0	0	0	0	0	0	0	0	0	0	0
ABQ07945.1	Fjoh_4946 [Flavobacterium johnsoniae UW101]	0	1	0	0	0	0	0	0	0	0	0	0	0	0	0
ABC30636.1	endoglucanase (Cel5;HCH_03914) (3.2.1.4) [Hahella chejuensis KCTC 2396]	0	10	6	0	1	0	0	0	0	0	0	0	1	1	0
AHJ96632.1	Hsw_1037 [Hymenobacter swuensis DY53]	0	5	0	0	0	0	0	0	0	0	0	0	0	1	0
ADM71316.1	PPE_03499 [Paenibacillus polymyxa E681]	0	4	1	0	0	0	0	0	0	0	0	0	0	0	0
ADO57958.1	PPSC2_c4008 [Paenibacillus polymyxa SC2]	0	1	0	0	0	0	0	0	0	0	0	0	0	0	0
AHM66052.1	PPSQR21_024100 (BglC) [Paenibacillus polymyxa SQR-21 SQR21]	0	0	0	0	0	0	0	0	0	0	0	0	0	1	0
ABG39929.1	Patl_1404 [Pseudoalteromonas atlantica T6c]	0	0	0	0	1	0	0	1	0	0	0	0	0	2	0
ADI47126.1	CelA8 [Pseudoalteromonas haloplanktis]	0	0	1	0	0	0	0	0	0	0	0	0	0	0	0
CAA76775.1	(3.2.1.4) [Pseudoalteromonas haloplanktis A23]	0	0	0	0	1	0	0	0	0	0	0	0	0	0	0
AAS58467.1	endoglucanase (CelA) (3.2.1.4) [Pseudoalteromonas sp. MB-1]	0	1	0	0	0	0	0	0	0	0	0	0	0	0	0
BAB79288.1	cellulase (AclA) [Pseudomonas sp. ND137]	0	4	1	0	0	0	0	0	0	0	0	0	0	1	0
ABD81754.1	(3.2.1.4) [Saccharophagus degradans 2-40]	0	0	1	0	0	0	0	0	0	0	0	0	0	0	0
ABD82260.1	[Saccharophagus degradans 2-40]	0	3	1	0	0	0	0	0	0	0	0	0	0	1	0
ABD82496.1	(3.2.1.4) [Saccharophagus degradans 2-40]	0	0	0	0	0	0	0	3	0	0	0	0	0	0	0
BAI50016.1	endoglucanase (Egl-R1) [Saccharophagus sp. JAM-R001]	0	3	0	0	0	0	0	0	0	0	0	0	0	2	0
BAL42331.1	cellulase (CelMytA) [Saccharophagus sp. Myt-1]	0	1	1	0	2	0	0	0	1	0	0	0	1	1	1
BAM21527.1	cellulase (CelMytB) (3.2.1.4) [Saccharophagus sp. Myt-1]	0	2	0	0	0	0	0	0	0	0	0	0	0	0	0
AFD07536.1	Solca_2501 [Solitalea canadensis DSM 3403]	0	0	1	0	0	0	0	0	0	0	0	0	0	0	0
CAN91626.1	sce1468 [Sorangium cellulosum 'So ce 56']	0	0	1	0	0	0	0	0	0	0	0	0	0	0	0
CAN95073.1	sce4910 (fragment) [Sorangium cellulosum 'So ce 56']	0	2	0	0	0	0	0	0	0	0	0	0	0	0	0
AGP34753.1	SCE1572_09655 [Sorangium cellulosum So0157-2]	0	1	0	0	0	0	0	0	0	0	0	0	0	0	0
AGP38247.1	SCE1572_29465 [Sorangium cellulosum So0157-2]	0	0	1	0	0	0	0	0	0	0	0	0	0	0	0
ABS72374.1	bifunctional beta-1,4-endoglucanase / cellobiohydrolase (CelAB) (3.2.1.4) [Teredinibacter turnerae T7901]	0	0	0	0	0	0	0	0	0	0	0	0	0	1	0
AEW10554.1	cellulase (CelA3;BP-CelA3) (fragment) [uncultured bacterium]	0	5	0	0	0	0	0	0	0	0	0	0	0	0	0
ADU86904.1	YBcontig212-01191-9 [uncultured bacterium]	0	1	1	0	0	0	0	0	0	0	0	0	0	0	0
ABA42185.1	beta-glucanase (UmCel5H;RC2) (3.2.1.4) [uncultured bacterium]	0	1	0	0	0	0	0	0	0	0	0	0	0	0	0
AFJ44728.1	[uncultured bacterium]	0	0	0	0	0	0	0	0	0	0	0	0	0	1	0
AGL50932.1	cellulase (CS10;CelCS10) [uncultured bacterium]	0	3	0	0	0	0	0	0	0	0	0	0	0	1	0
ABI94085.1	endo-beta-1,4-glucanase (RC3) (3.2.1.4) [uncultured bacterium]	0	0	0	0	0	1	0	0	0	0	0	0	0	0	0
AGW99969.1	endo-beta-1,4-glucanase (Endos13) [uncultured bacterium]	0	4	0	0	0	1	0	0	0	0	0	0	0	0	0
BAO65790.1	cellulase [uncultured bacterium]	0	3	3	0	0	0	0	0	0	0	0	0	0	3	0
BAO65795.1	endoglucanase [uncultured bacterium]	0	0	1	0	0	0	0	0	0	0	0	0	0	0	0
BAO65801.1	cellulase [uncultured bacterium]	0	0	2	0	0	0	0	0	0	0	0	0	0	0	0
ABW39337.1	4348GL29_006 [uncultured bacterium]	0	2	0	0	0	0	0	0	0	0	0	0	0	1	0
ABW39356.1	4399GL43_001 [uncultured bacterium]	0	1	0	0	0	0	0	0	0	0	0	0	0	0	0
ABW39358.1	4399GL47_001 [uncultured bacterium]	0	0	1	0	0	0	0	0	0	0	0	0	0	0	0
ADJ93836.1	(3.2.1.4) [Vibrio xiamenensis G21]	0	6	1	0	0	0	0	1	0	0	0	0	2	0	0
Eukaryota		0	26	5	0	0	0	0	0	0	0	0	2	1	2	0
BAI44493.1	endo-beta-1,4-glucanase (Aalpha-Eng-1) [Aphelenchus avenae]	0	1	0	0	0	0	0	0	0	0	0	0	0	0	0
AHI15750.1	glycoside hydrolase family 5 subfamily 2 (Gh5-5) [Apriona japonica]	0	0	1	0	0	0	0	0	0	0	0	0	0	0	0
AHI15746.1	glycoside hydrolase family 5 subfamily 2 (Gh5-1) [Apriona japonica]	0	1	0	0	0	0	0	0	0	0	0	0	0	0	0
AHI15747.1	glycoside hydrolase family 5 subfamily 2 (Gh5-2) [Apriona japonica]	0	1	0	0	0	0	0	0	0	0	0	0	0	0	0
AHI15748.1	glycoside hydrolase family 5 subfamily 2 (Gh5-3) [Apriona japonica]	0	0	0	0	0	0	0	0	0	0	0	0	1	0	0
AAC63988.1	endoglucanase 1 (Eng1;Eng-1;Gr-eng1;Gr-eng-1) (3.2.1.4) [Globodera rostochiensis RO-1]	0	1	0	0	0	0	0	0	0	0	0	0	0	0	0
ACO55952.1	endo-beta-1,4-glucanase 1a (Eng1A;Eng-1A;Halpha-eng-1a) [Heterodera avenae]	0	1	0	0	0	0	0	0	0	0	0	0	0	0	0
AAM50039.1	cellulase (Eng6;Eng-6;G26D05) [Heterodera glycines]	0	1	0	0	0	0	0	0	0	0	0	0	0	0	0
AER27805.1	beta-1,4-endoglucanase (fragment) [Meloidogyne chitwoodi]	0	0	1	0	0	0	0	0	0	0	0	0	0	0	0
AAK21891.1	beta-1,4-endoglucanase Eng-1i (fragment) [Meloidogyne hapla]	0	1	0	0	0	0	0	0	0	0	0	0	0	0	0
ADI24131.1	endo-beta-1,4-glucanase I (EGaseI) [Oncideres albomarginata chamela]	0	2	0	0	0	0	0	0	0	0	0	0	0	0	0
AER27764.1	beta-1,4-endoglucanase (fragment) [Pratylenchus convallariae]	0	1	0	0	0	0	0	0	0	0	0	0	0	0	0
AER27775.1	beta-1,4-endoglucanase (fragment) [Pratylenchus pratensis]	0	1	0	0	0	0	0	0	0	0	0	0	0	0	0
AER27779.1	beta-1,4-endoglucanase (fragment) [Pratylenchus pratensis]	0	1	0	0	0	0	0	0	0	0	0	0	0	0	0
AER27781.1	beta-1,4-endoglucanase (fragment) [Pratylenchus thornei]	0	1	0	0	0	0	0	0	0	0	0	0	0	0	0
AER27782.1	beta-1,4-endoglucanase (fragment) [Pratylenchus thornei]	0	1	0	0	0	0	0	0	0	0	0	0	0	0	0
BAB86867.1	endoglucanase / cellulase (PhEG) (3.2.1.4) [Psacothea hilaris]	0	0	0	0	0	0	0	0	0	0	0	1	0	0	0
ABV54446.1	endo-beta-1,4-glucanase (Eng1A;Rs-Eng1A) [Radopholus similis]	0	2	0	0	0	0	0	0	0	0	0	0	0	0	0
ABV54447.1	endo-beta-1,4-glucanase (Eng1;Eng1B;Rs-Eng1B) [Radopholus similis]	0	0	0	0	0	0	0	0	0	0	0	0	0	1	0
ABV54448.1	endo-beta-1,4-glucanase (Eng2;Rs-Eng2) [Radopholus similis]	0	0	1	0	0	0	0	0	0	0	0	0	0	0	0
AER27805.1	beta-1,4-endoglucanase (fragment) [Meloidogyne chitwoodi]	0	0	1	0	0	0	0	0	0	0	0	0	0	0	0
AAK21891.1	beta-1,4-endoglucanase Eng-1i (fragment) [Meloidogyne hapla]	0	1	0	0	0	0	0	0	0	0	0	0	0	0	0
ADI24131.1	endo-beta-1,4-glucanase I (EGaseI) [Oncideres albomarginata chamela]	0	2	0	0	0	0	0	0	0	0	0	0	0	0	0
AER27764.1	beta-1,4-endoglucanase (fragment) [Pratylenchus convallariae]	0	1	0	0	0	0	0	0	0	0	0	0	0	0	0
AER27775.1	beta-1,4-endoglucanase (fragment) [Pratylenchus pratensis]	0	1	0	0	0	0	0	0	0	0	0	0	0	0	0
AER27779.1	beta-1,4-endoglucanase (fragment) [Pratylenchus pratensis]	0	1	0	0	0	0	0	0	0	0	0	0	0	0	0
AER27781.1	beta-1,4-endoglucanase (fragment) [Pratylenchus thornei]	0	1	0	0	0	0	0	0	0	0	0	0	0	0	0
AER27782.1	beta-1,4-endoglucanase (fragment) [Pratylenchus thornei]	0	1	0	0	0	0	0	0	0	0	0	0	0	0	0
BAB86867.1	endoglucanase / cellulase (PhEG) (3.2.1.4) [Psacothea hilaris]	0	0	0	0	0	0	0	0	0	0	0	1	0	0	0
ABV54446.1	endo-beta-1,4-glucanase (Eng1A;Rs-Eng1A) [Radopholus similis]	0	2	0	0	0	0	0	0	0	0	0	0	0	0	0
ABV54447.1	endo-beta-1,4-glucanase (Eng1;Eng1B;Rs-Eng1B) [Radopholus similis]	0	0	0	0	0	0	0	0	0	0	0	0	0	1	0
ABV54448.1	endo-beta-1,4-glucanase (Eng2;Rs-Eng2) [Radopholus similis]	0	0	1	0	0	0	0	0	0	0	0	0	0	0	0
unclassified		0	0	10	0	0	0	0	0	0	0	0	2	2	0	0
ACY24859.1	endo-beta-1,4-glucanase (G10-10) [uncultured organism]	0	0	5	0	0	0	0	0	0	0	0	1	0	0	0
AAM56798.1	Sequence 63 from patent US 6368844 7EG1 [unidentified]	0	0	0	0	0	0	0	0	0	0	0	0	1	0	0
ACY24859.1	endo-beta-1,4-glucanase (G10-10) [uncultured organism]	0	0	5	0	0	0	0	0	0	0	0	1	0	0	0
AAM56798.1	Sequence 63 from patent US 6368844 7EG1 [unidentified]	0	0	0	0	0	0	0	0	0	0	0	0	1	0	0
GH5_4		30	67	3	2	30	2	9	2	5	0	0	1	0	2	4
Bacteria		30	59	1	2	18	2	7	2	5	0	0	1	0	2	4
ADY35478.1	Bacsa_0886 [Bacteroides salanitronis DSM 18170]	0	1	0	0	0	0	0	0	0	0	0	0	0	0	0
CAA35574.1	endo-beta-1,4-glucanase 1 (End1;EglI;EGI) (3.2.1.4) [Butyrivibrio fibrisolvens H17C]	0	2	0	0	0	0	0	0	0	0	0	0	0	0	0
ACZ98607.1	CGSCsYakCAS_19105 (fragment) [Cellulosilyticum ruminicola CGMCC 1.5065]	1	0	0	0	0	0	0	0	0	0	0	0	0	0	0
ACE83841.1	[Cellvibrio japonicus Ueda107]	0	0	0	0	0	0	0	0	0	0	0	0	0	1	0
AAK81397.1	CAC3469 [Clostridium acetobutylicum ATCC 824]	1	2	0	0	0	0	0	0	0	0	0	0	0	0	0
ADZ22510.1	CEA_G3473 [Clostridium acetobutylicum EA 2018]	2	5	0	0	0	0	0	0	0	0	0	0	0	0	0
ADZ19875.1	CEA_G0836 [Clostridium acetobutylicum EA 2018]	1	0	0	0	0	0	0	0	0	0	0	0	0	0	0
ADZ19876.1	CEA_G0837 [Clostridium acetobutylicum EA 2018]	0	0	0	0	0	0	0	1	0	0	0	0	0	1	0
ADL52928.1	Clocel_3242 [Clostridium cellulovorans 743B]	3	4	0	0	0	0	0	0	0	0	0	0	0	0	0
AAA23233.1	endo-beta-1,4-glucanase / xylanase D (EngD) (3.2.1.4) [Clostridium cellulovorans ATCC 35269]	3	3	0	0	0	1	0	1	0	0	0	0	0	0	0
AEV67086.1	Clocl_0350 [Clostridium clariflavum DSM 19732]	1	0	0	0	0	0	0	0	0	0	0	0	0	0	0
CDM69884.1	CM240_2767 [Clostridium sp. M2/40]	3	5	0	0	0	0	0	0	0	0	0	0	0	0	0
CDM70321.1	CM240_3204 (CelA1) (partial) [Clostridium sp. M2/40]	0	1	0	0	0	0	0	0	0	0	0	0	0	0	0
ACI18413.1	DICTH_1476 [Dictyoglomus thermophilum H-6-12 ATCC 35947]	0	0	1	0	0	0	0	0	0	0	0	0	0	0	0
ACK42859.1	Dtur_1586 [Dictyoglomus turgidum DSM 6724]	0	0	0	0	0	0	0	0	0	0	0	1	0	0	0
AAA23224.1	(3.1.1.72) [Ruminiclostridium thermocellum]	5	18	0	0	0	1	0	0	1	0	0	0	0	0	0
ADU74487.1	Clo1313_1425 [Clostridium thermocellum DSM 1313]	2	1	0	0	0	0	0	0	0	0	0	0	0	0	0
ADU23111.1	Rumal_2636 [Ruminococcus albus 7]	0	5	0	0	0	0	0	0	3	0	0	0	0	0	0
ADU21608.1	[Ruminococcus albus 7]	0	2	0	0	0	0	0	0	0	0	0	0	0	0	0
CCO05659.1	RBI_I01961 [Ruminococcus sp. 80/3]	3	0	0	0	0	0	0	0	0	0	0	0	0	0	0
ADU86903.1	YBcontig210-00018-3 [uncultured bacterium]	0	2	0	0	0	0	0	0	0	0	0	0	0	0	0
ABJ52796.1	endoglucanase (fragment) [uncultured Butyrivibrio sp.]	0	2	0	0	0	0	0	0	0	0	0	0	0	0	0
CCG00653.1	S3_DL_C5_0019 [uncultured Flavobacteriia bacterium]	0	0	0	2	18	0	7	0	0	0	0	0	0	0	4
CAZ94281.1	zobellia_208 (EngA) [Zobellia galactanivorans DsiJT]	5	6	0	0	0	0	0	0	1	0	0	0	0	0	0
Eukaryota		0	2	0	0	0	0	0	0	0	0	0	0	0	0	0
CDG46723.1	CMC6 (fragment) [uncultured equine caecal ciliate]	0	1	0	0	0	0	0	0	0	0	0	0	0	0	0
unclassified		0	6	2	0	12	0	2	0	0	0	0	0	0	0	0
AEV46032.1	cellulase (cel5-A9) (fragment) [uncultured microorganism]	0	0	1	0	0	0	0	0	0	0	0	0	0	0	0
AEV46034.1	cellulase (Cel5-A15) (fragment) [uncultured microorganism]	0	3	0	0	0	0	0	0	0	0	0	0	0	0	0
AEV46037.1	cellulase (Cel5-A26) (fragment) [uncultured microorganism]	0	0	0	0	1	0	0	0	0	0	0	0	0	0	0
ADD61973.1	ORF [uncultured organism]	0	0	0	0	5	0	1	0	0	0	0	0	0	0	0
AEV46032.1	cellulase (cel5-A9) (fragment) [uncultured microorganism]	0	0	1	0	0	0	0	0	0	0	0	0	0	0	0
AEV46034.1	cellulase (Cel5-A15) (fragment) [uncultured microorganism]	0	3	0	0	0	0	0	0	0	0	0	0	0	0	0
AEV46037.1	cellulase (Cel5-A26) (fragment) [uncultured microorganism]	0	0	0	0	1	0	0	0	0	0	0	0	0	0	0
ADD61973.1	ORF [uncultured organism]	0	0	0	0	5	0	1	0	0	0	0	0	0	0	0
GH5_5		0	0	4	0	1	0	0	0	0	1	0	0	0	1	0
Bacteria		0	0	4	0	1	0	0	0	0	1	0	0	0	1	0
AGA76691.1	Echvi_0403 [Echinicola vietnamensis DSM 17526]	0	0	0	0	1	0	0	0	0	1	0	0	0	0	0
ACA15596.1	M446_1066 [Methylobacterium sp. 4-46]	0	0	1	0	0	0	0	0	0	0	0	0	0	0	0
ACA17809.1	M446_3420 [Methylobacterium sp. 4-46]	0	0	1	0	0	0	0	0	0	0	0	0	0	0	0
ADZ72336.1	SL003B_3916 [Polymorphum gilvum SL003B-26A1]	0	0	1	0	0	0	0	0	0	0	0	0	0	0	0
AEO40341.1	XACM_0030 (Egl1) [Xanthomonas axonopodis pv. citrumelo F1]	0	0	1	0	0	0	0	0	0	0	0	0	0	0	0
CDF59718.1	XFF4834R_chr00290 [Xanthomonas fuscans subsp. fuscans 4834-R]	0	0	0	0	0	0	0	0	0	0	0	0	0	1	0
GH5_7		3	4	3	1	10	1	0	2	1	2	0	2	0	1	1
Archaea		0	0	0	0	0	0	0	1	0	0	0	0	0	0	0
ACV12562.1	Huta_2396 [Halorhabdus utahensis DSM 12940]	0	0	0	0	0	0	0	1	0	0	0	0	0	0	0
Bacteria		3	4	1	1	0	1	0	1	1	0	0	2	0	1	0
ADU14517.1	Astex_2880 [Asticcacaulis excentricus CB 48 CS 48]	1	0	0	0	0	0	0	0	0	0	0	1	0	0	0
ADY36271.1	Bacsa_1708 [Bacteroides salanitronis DSM 18170]	0	0	0	0	0	0	0	0	0	0	0	1	0	0	0
ACL94308.1	CCNA_00843 [Caulobacter crescentus NA1000]	0	1	0	0	0	0	0	0	0	0	0	0	0	0	0
ADG11997.1	Cseg_3572 [Caulobacter segnis ATCC 21756]	0	1	0	0	0	0	0	0	0	0	0	0	0	0	0
ABZ70170.1	Caul_1040 [Caulobacter sp. K31]	1	0	0	0	0	0	0	0	0	0	0	0	0	0	0
ACY02070.1	endo-beta-1,4-mannosidase [Flammeovirga yaeyamensis MY04]	0	0	1	1	0	0	0	0	0	0	0	0	0	0	0
EFC70148.2	HMPREF0669_01845 [Prevotella sp. oral taxon 299 str. F0039]	0	0	0	0	0	0	0	0	1	0	0	0	0	0	0
ADV26307.1	Psesu_0448 [Pseudoxanthomonas suwonensis 11-1]	1	0	0	0	0	0	0	0	0	0	0	0	0	0	0
AFV00491.1	M5M_16800 [Simiduia agarivorans SA1 = DSM 21679]	0	1	0	0	0	0	0	0	0	0	0	0	0	0	0
ACZ31816.1	Xcel_2802 [Xylanimonas cellulosilytica DSM 15894]	0	1	0	0	0	1	0	1	0	0	0	0	0	1	0
Eukaryota		0	0	2	0	10	0	0	0	0	2	0	0	0	0	1
CCO17574.1	Bathy08g02370 [Bathycoccus prasinos RCC 1105]	0	0	0	0	2	0	0	0	0	0	0	0	0	0	0
CCO20718.1	Bathy18g00630 (fragment) [Bathycoccus prasinos RCC 1105]	0	0	0	0	0	0	0	0	0	0	0	0	0	0	1
ACO62742.1	MICPUN_58085 [Micromonas sp. RCC299]	0	0	0	0	1	0	0	0	0	0	0	0	0	0	0
ACO64669.1	MICPUN_83090 (fragment) [Micromonas sp. RCC299]	0	0	0	0	1	0	0	0	0	0	0	0	0	0	0
ABO94548.1	OSTLU_4036 (fragment) [Ostreococcus lucimarinus CCE9901]	0	0	0	0	1	0	0	0	0	0	0	0	0	0	0
ABO95765.1	OSTLU_3863 (fragment) [Ostreococcus lucimarinus CCE9901]	0	0	0	0	0	0	0	0	0	1	0	0	0	0	0
ADE76368.1	unknown [Picea sitchensis]	0	0	0	0	1	0	0	0	0	0	0	0	0	0	0
CBQ71814.1	sr12670 [Sporisorium reilianum SRZ2]	0	0	1	0	0	0	0	0	0	0	0	0	0	0	0
ACO62742.1	MICPUN_58085 [Micromonas sp. RCC299]	0	0	0	0	1	0	0	0	0	0	0	0	0	0	0
ACO64669.1	MICPUN_83090 (fragment) [Micromonas sp. RCC299]	0	0	0	0	1	0	0	0	0	0	0	0	0	0	0
ABO94548.1	OSTLU_4036 (fragment) [Ostreococcus lucimarinus CCE9901]	0	0	0	0	1	0	0	0	0	0	0	0	0	0	0
ABO95765.1	OSTLU_3863 (fragment) [Ostreococcus lucimarinus CCE9901]	0	0	0	0	0	0	0	0	0	1	0	0	0	0	0
ADE76368.1	unknown [Picea sitchensis]	0	0	0	0	1	0	0	0	0	0	0	0	0	0	0
CBQ71814.1	sr12670 [Sporisorium reilianum SRZ2]	0	0	1	0	0	0	0	0	0	0	0	0	0	0	0
GH5_8		0	0	11	0	1	0	0	0	0	1	0	2	0	8	0
Bacteria		0	0	11	0	1	0	0	0	0	1	0	2	0	8	0
AEE43708.1	beta-1,4-mannanase (ManH) (3.2.1.78) [Cellulosimicrobium sp. HY-13]	0	0	4	0	0	0	0	0	0	0	0	1	0	3	0
AAO31760.1	(3.2.1.78) [Cellvibrio japonicus Ueda107]	0	0	0	0	0	0	0	0	0	0	0	0	0	1	0
ACV09865.1	Jden_2228 (fragment) [Jonesia denitrificans DSM 20603]	0	0	2	0	0	0	0	0	0	0	0	0	0	0	0
ADO56715.1	PPSC2_c2748 [Paenibacillus polymyxa SC2]	0	0	0	0	1	0	0	0	0	0	0	0	0	0	0
BAB79290.2	beta-1,4-mannanase (AmnA) [Pseudomonas sp. ND137]	0	0	3	0	0	0	0	0	0	1	0	0	0	0	0
ABD79918.1	[Saccharophagus degradans 2-40]	0	0	0	0	0	0	0	0	0	0	0	1	0	0	0
CCA60191.1	SVEN_6905 [Streptomyces venezuelae ATCC 10712]	0	0	1	0	0	0	0	0	0	0	0	0	0	0	0
ADT88758.1	vfu_B00526 [Vibrio furnissii NCTC 11218]	0	0	1	0	0	0	0	0	0	0	0	0	0	0	0
BAA25188.1	beta-mannanase (ManA) (3.2.1.78) [Vibrio sp. MA-138]	0	0	0	0	0	0	0	0	0	0	0	0	0	4	0
GH5_10		0	9	3	0	0	0	0	0	0	0	0	1	0	0	0
Bacteria		0	9	2	0	0	0	0	0	0	0	0	1	0	0	0
ACA05117.2	beta-1,4-mannanase [Flammeovirga yaeyamensis MY04]	0	6	0	0	0	0	0	0	0	0	0	0	0	0	0
AFN74927.1	MROS_1693 [Melioribacter roseus P3M]	0	1	0	0	0	0	0	0	0	0	0	0	0	0	0
AEJ60366.1	Spith_0079 [Spirochaeta thermophila DSM 6578]	0	2	2	0	0	0	0	0	0	0	0	1	0	0	0
Eukaryota		0	0	1	0	0	0	0	0	0	0	0	0	0	0	0
ADE58569.1	GH5E [Limnoria quadripunctata]	0	0	1	0	0	0	0	0	0	0	0	0	0	0	0
GH5_13		0	0	0	0	9	0	0	1	0	0	0	0	0	0	0
Bacteria		0	0	0	0	9	0	0	1	0	0	0	0	0	0	0
AHW60256.1	FH5T_13235 [Draconibacterium orientale FH5T]	0	0	0	0	1	0	0	0	0	0	0	0	0	0	0
AHE71948.1	M942_23190 [Enterobacter cloacae P101]	0	0	0	0	1	0	0	0	0	0	0	0	0	0	0
CCG98164.1	FAES_0150 [Fibrella aestuarina BUZ 2]	0	0	0	0	1	0	0	0	0	0	0	0	0	0	0
EAR01578.1	FB2170_13658 [Flavobacteriales bacterium HTCC2170]	0	0	0	0	0	0	0	1	0	0	0	0	0	0	0
AEV97676.1	Niako_1305 [Niastella koreensis GR20-10]	0	0	0	0	1	0	0	0	0	0	0	0	0	0	0
ACU02730.1	Phep_0506 [Pedobacter heparinus DSM 2366]	0	0	0	0	1	0	0	0	0	0	0	0	0	0	0
ACU04844.1	Phep_2643 [Pedobacter heparinus DSM 2366]	0	0	0	0	1	0	0	0	0	0	0	0	0	0	0
AGA27084.1	Sinac_2792 [Singulisphaera acidiphila DSM 18658]	0	0	0	0	2	0	0	0	0	0	0	0	0	0	0
BAI98385.1	SJA_C2-00220 [Sphingobium japonicum UT26S UT26S (= NBRC 101211)]	0	0	0	0	1	0	0	0	0	0	0	0	0	0	0
GH5_14		0	0	2	0	0	0	0	0	0	0	0	0	0	0	0
Eukaryota		0	0	2	0	0	0	0	0	0	0	0	0	0	0	0
CAN74231.1	VITISV_000586 [Vitis vinifera]	0	0	1	0	0	0	0	0	0	0	0	0	0	0	0
GH5_17		0	2	0	0	0	0	0	0	0	0	0	0	0	0	0
Bacteria		0	2	0	0	0	0	0	0	0	0	0	0	0	0	0
AAK78894.1	CAC0918 [Clostridium acetobutylicum ATCC 824]	0	2	0	0	0	0	0	0	0	0	0	0	0	0	0
GH5_25		5	492	27	1	0	1	0	3	1	0	0	8	1	9	0
Bacteria		5	492	27	1	0	1	0	3	1	0	0	8	1	9	0
BAJ63901.1	ANT_18750 [Anaerolinea thermophila UNI-1]	1	14	0	0	0	0	0	0	0	0	0	1	0	0	0
ADU14148.1	Astex_2497 [Asticcacaulis excentricus CB 48 CS 48]	0	0	0	0	0	0	0	0	0	0	0	0	1	0	0
ADG10516.1	Cseg_2049 [Caulobacter segnis ATCC 21756]	0	0	1	0	0	0	0	0	0	0	0	0	0	0	0
ACI18520.1	[Dictyoglomus thermophilum H-6-12 ATCC 35947]	0	0	0	0	0	0	0	0	1	0	0	1	0	0	0
ACI19154.1	DICTH_0506 [Dictyoglomus thermophilum H-6-12 ATCC 35947]	0	0	1	0	0	0	0	1	0	0	0	0	0	1	0
ACI19692.1	DICTH_0505 [Dictyoglomus thermophilum H-6-12 ATCC 35947]	1	40	6	0	0	1	0	0	0	0	0	0	0	1	0
ACK41602.1	cellulase (Dtur_0276) [Dictyoglomus turgidum DSM 6724]	0	0	1	0	0	0	0	0	0	0	0	0	0	0	0
ACK41955.1	(3.2.1.4) [Dictyoglomus turgidum DSM 6724]	0	24	1	0	0	0	0	0	0	0	0	0	0	0	0
ACK41954.1	Dtur_0669 [Dictyoglomus turgidum DSM 6724]	0	9	1	0	0	0	0	0	0	0	0	1	0	0	0
AFY97404.1	(3.2.1.4) [Fervidobacterium gondwanense AB39]	0	0	0	1	0	0	0	0	0	0	0	0	0	0	0
ABS61403.1	(3.2.1.4) [Fervidobacterium nodosum Rt17-B1]	1	0	0	0	0	0	0	0	0	0	0	0	0	0	0
AHG93393.1	J421_5858 [Gemmatimonadetes bacterium KBS708]	0	30	0	0	0	0	0	0	0	0	0	0	0	0	0
ACT59657.1	Hbal_1973 [Hirschia baltica ATCC 49814 ATCC 59814]	0	16	4	0	0	0	0	0	0	0	0	1	0	0	0
ADV60918.1	Isop_0323 [Isosphaera pallida ATCC 43644]	0	3	0	0	0	0	0	0	0	0	0	1	0	0	0
CDN49507.1	RG540_CH33430 [Rhizobium galegae bv. orientalis str. HAMBI 540]	0	23	0	0	0	0	0	0	0	0	0	0	0	0	0
ADV27430.1	Psesu_1585 [Pseudoxanthomonas suwonensis 11-1]	0	4	0	0	0	0	0	0	0	0	0	0	0	0	0
AEG92121.1	Rta_10360 [Ramlibacter tataouinensis TTB310]	0	0	2	0	0	0	0	0	0	0	0	1	0	0	0
CAD78375.1	RB5256 [Rhodopirellula baltica SH 1]	0	0	0	0	0	0	0	1	0	0	0	0	0	0	0
ADU46314.1	Rpdx1_4768 [Rhodopseudomonas palustris DX-1]	0	29	0	0	0	0	0	0	0	0	0	0	0	1	0
CAH68695.1	Sequence 27 from patent US 6368844 [Thermotoga sp.]	0	2	0	0	0	0	0	0	0	0	0	0	0	0	0
ACB09420.1	TRQ2_1074 [Thermotoga sp. RQ2]	0	0	0	0	0	0	0	0	0	0	0	1	0	1	0
ADV57621.1	ORF (fragment) [uncultured bacterium]	0	0	1	0	0	0	0	0	0	0	0	0	0	0	0
ADV57631.1	ORF (fragment) [uncultured bacterium]	0	0	1	0	0	0	0	0	0	0	0	0	0	0	0
AID57617.1	endoglucanase GH5_25 [uncultured bacterium]	2	298	8	0	0	0	0	1	0	0	0	0	0	4	0
AEW47942.1	ORF [uncultured bacterium A2_10]	0	0	0	0	0	0	0	0	0	0	0	0	0	1	0
AEW47949.1	B2_GH5 [uncultured bacterium B2_18]	0	0	0	0	0	0	0	0	0	0	0	1	0	0	0
GH5_26		1	2	2	0	0	2	0	2	1	1	0	3	0	1	0
Bacteria		1	2	2	0	0	2	0	0	1	1	0	3	0	1	0
ACE83249.1	[Cellvibrio japonicus Ueda107]	0	1	0	0	0	0	0	0	0	0	0	0	0	0	0
AAB61461.1	(3.2.1.4) [Cellvibrio mixtus ATCC 12120]	0	0	0	0	0	1	0	0	0	0	0	0	0	0	0
AFN73747.1	MROS_0504 [Melioribacter roseus P3M]	0	0	1	0	0	0	0	0	0	0	0	1	0	1	0
YP_003289322	YP_003289322 [Rhodothermus marinus DSM 4252]	0	0	0	0	0	0	0	0	0	1	0	0	0	0	0
AEN71978.1	Rhom172_0025 [Rhodothermus marinus SG0.5JP17-172]	0	1	0	0	0	0	0	0	0	0	0	0	0	0	0
AEI50006.1	Runsl_3648 [Runella slithyformis DSM 19594]	0	0	0	0	0	0	0	0	0	0	0	1	0	0	0
ABD80834.1	(3.2.1.4) [Saccharophagus degradans 2-40]	0	0	1	0	0	0	0	0	0	0	0	0	0	0	0
ACR12128.1	TERTU_0183 [Teredinibacter turnerae T7901]	0	0	0	0	0	0	0	0	0	0	0	1	0	0	0
AFJ05146.1	(3.2.1.4) [uncultured bacterium]	0	0	0	0	0	0	0	0	1	0	0	0	0	0	0
CAP07661.1	(3.2.1.4) [uncultured rumen bacterium]	0	0	0	0	0	1	0	0	0	0	0	0	0	0	0
AAA27599.1	beta-endoglucanase (EgxA;Eng) (frameshift) [Xanthomonas albilineans XAI-I]	1	0	0	0	0	0	0	0	0	0	0	0	0	0	0
unclassified		0	0	0	0	0	0	0	2	0	0	0	0	0	0	0
ACA61168.1	beta-glucanase (M11-2) [uncultured microorganism]	0	0	0	0	0	0	0	1	0	0	0	0	0	0	0
GH5_27		0	0	0	0	1	0	0	0	0	0	0	0	0	0	0
Eukaryota		0	0	0	0	1	0	0	0	0	0	0	0	0	0	0
BAD20464.1	endoglycoceramidase (EGCase) (3.2.1.123) [Hydra magnipapillata]	0	0	0	0	1	0	0	0	0	0	0	0	0	0	0
GH5_28		0	0	0	0	1	0	0	0	0	0	0	0	0	0	0
Bacteria		0	0	0	0	1	0	0	0	0	0	0	0	0	0	0
CBH47454.1	REQ_13700 [Rhodococcus equi 103S]	0	0	0	0	1	0	0	0	0	0	0	0	0	0	0
GH5_32		0	0	0	0	20	0	1	0	0	0	0	0	0	0	2
Eukaryota		0	0	0	0	20	0	1	0	0	0	0	0	0	0	2
CCO13990.1	Bathy01g00860 [Bathycoccus prasinos RCC 1105]	0	0	0	0	2	0	1	0	0	0	0	0	0	0	0
ABO99132.1	OSTLU_26901 [Ostreococcus lucimarinus CCE9901]	0	0	0	0	4	0	0	0	0	0	0	0	0	0	1
ABO94043.1	OSTLU_92070 [Ostreococcus lucimarinus CCE9901]	0	0	0	0	4	0	0	0	0	0	0	0	0	0	0
CAL50004.1	Ot01g00930 [Ostreococcus tauri OTTH0595]	0	0	0	0	1	0	0	0	0	0	0	0	0	0	0
ABO99132.1	OSTLU_26901 [Ostreococcus lucimarinus CCE9901]	0	0	0	0	4	0	0	0	0	0	0	0	0	0	1
ABO94043.1	OSTLU_92070 [Ostreococcus lucimarinus CCE9901]	0	0	0	0	4	0	0	0	0	0	0	0	0	0	0
CAL50004.1	Ot01g00930 [Ostreococcus tauri OTTH0595]	0	0	0	0	1	0	0	0	0	0	0	0	0	0	0
GH5_37		0	12	3	0	0	0	0	0	0	0	0	0	0	0	0
Bacteria		0	12	1	0	0	0	0	0	0	0	0	0	0	0	0
AHF24623.1	ORF [uncultured bacterium Contig27]	0	4	0	0	0	0	0	0	0	0	0	0	0	0	0
AHF25090.1	ORF [uncultured bacterium Contig52]	0	8	0	0	0	0	0	0	0	0	0	0	0	0	0
AAA91966.1	endo-beta-1,4-glucanase (CelA;Cel) (3.2.1.4) [unidentified bacterium]	0	0	1	0	0	0	0	0	0	0	0	0	0	0	0
unclassified		0	0	2	0	0	0	0	0	0	0	0	0	0	0	0
ACA61165.1	beta-glucanase (M8-2) [uncultured microorganism]	0	0	1	0	0	0	0	0	0	0	0	0	0	0	0
GH5_38		0	0	0	0	2	0	0	0	0	0	0	0	0	0	0
unclassified		0	0	0	0	2	0	0	0	0	0	0	0	0	0	0
ADX05725.1	SARM_0054 / 1557092_108510 / MH-18 [uncultured organism]	0	0	0	0	1	0	0	0	0	0	0	0	0	0	0
GH5_39		0	0	0	0	0	0	0	0	0	0	0	2	0	2	0
Bacteria		0	0	0	0	0	0	0	0	0	0	0	2	0	2	0
BAL79794.1	S23_66150 [Bradyrhizobium sp. S23321]	0	0	0	0	0	0	0	0	0	0	0	1	0	2	0
CAE30024.1	RPA4584 [Rhodopseudomonas palustris CGA009]	0	0	0	0	0	0	0	0	0	0	0	1	0	0	0
GH5_40		0	0	0	0	0	0	0	0	0	0	0	1	0	0	0
Bacteria		0	0	0	0	0	0	0	0	0	0	0	1	0	0	0
ACU72620.1	Caci_3718 [Catenulispora acidiphila DSM 44928]	0	0	0	0	0	0	0	0	0	0	0	1	0	0	0
GH5_42		49	177	7	0	0	6	0	2	12	0	0	1	6	4	0
Bacteria		49	177	7	0	0	6	0	2	12	0	0	1	6	4	0
ADV50329.1	Celal_3054 [Cellulophaga algicola DSM 14237]	12	16	0	0	0	3	0	0	2	0	0	0	0	0	0
ADY29058.1	Celly_1230 [Cellulophaga lytica DSM 7489]	0	11	0	0	0	0	0	1	0	0	0	0	0	0	0
AEE20371.1	Krodi_2393 [Krokinobacter sp. 4H-3-7-5]	1	9	0	0	0	0	0	0	1	0	0	0	4	0	0
AEW86500.1	FCOL_08425 [Flavobacterium columnare ATCC 49512]	1	5	0	0	0	0	0	0	1	0	0	0	0	0	0
AIG32030.1	IA01_04415 [Flavobacterium psychrophilum V1-20]	0	0	2	0	0	0	0	0	0	0	0	0	0	0	0
AIG36548.1	IA04_04315 [Flavobacterium psychrophilum V4-24]	0	1	1	0	0	0	0	0	0	0	0	0	0	0	0
AIG38813.1	IA05_04400 [Flavobacterium psychrophilum V4-28]	1	0	0	0	0	0	0	0	0	0	0	0	0	1	0
ABX04821.1	Haur_2181 [Herpetosiphon aurantiacus ATCC 23779]	1	0	0	0	0	0	0	0	0	0	0	0	0	0	0
AEH01195.1	Lacal_1347 [Lacinutrix sp. 5H-3-7-4]	3	20	0	0	0	0	0	0	1	0	0	0	0	0	0
EAR02312.1	FB2170_03475 [Flavobacteriales bacterium HTCC2170]	8	35	0	0	0	0	0	0	2	0	0	0	0	0	0
AGC77879.1	DDD_2752 [Nonlabens dokdonensis DSW-6]	7	8	0	0	0	1	0	0	0	0	0	0	1	0	0
EAQ41672.3	MED152_03120 [Polaribacter sp. MED152]	2	8	0	0	0	1	0	0	1	0	0	0	0	1	0
ZP_01052244.1	ZP_01052244.1 [Polaribacter sp. MED152]	1	13	0	0	0	0	0	0	1	0	0	1	0	1	0
AFU68400.1	P700755_001511 [Psychroflexus torquis ATCC 700755]	7	21	0	0	0	1	0	1	2	0	0	0	0	0	0
CAZ97132.1	zobellia_2986 [Zobellia galactanivorans DsiJT]	1	18	3	0	0	0	0	0	0	0	0	0	1	0	0
ADF51393.1	ZPR_1048 [Zunongwangia profunda SM-A87 SMA-87]	4	12	1	0	0	0	0	0	1	0	0	0	0	1	0
GH5_46		0	0	3	2	50	0	11	2	0	3	0	0	1	4	8
Bacteria		0	0	3	2	50	0	11	2	0	3	0	0	1	4	8
ACM28380.1	Arad_4741 [Agrobacterium radiobacter K84]	0	0	0	0	2	0	0	1	0	0	0	0	0	0	0
ACE83242.1	[Cellvibrio japonicus Ueda107]	0	0	0	0	2	0	1	1	0	0	0	0	0	2	1
ACU61608.1	Cpin_4149 [Chitinophaga pinensis DSM 2588]	0	0	2	0	2	0	0	0	0	0	0	0	0	0	1
BAP32178.1	CHSO_3141 (Cel5G) [Chryseobacterium sp. StRB126]	0	0	0	0	5	0	3	0	0	2	0	0	0	0	0
AIL46213.1	BD94_2438 [Elizabethkingia anophelis NUHP1]	0	0	0	0	5	0	0	0	0	1	0	0	0	0	0
CCG98291.1	FAES_0277 [Fibrella aestuarina BUZ 2]	0	0	1	0	4	0	2	0	0	0	0	0	0	1	2
AFH50281.1	IALB_2578 [Ignavibacterium album JCM 16511]	0	0	0	0	5	0	0	0	0	0	0	0	0	0	0
AEW02398.1	Niako_6173 [Niastella koreensis GR20-10]	0	0	0	1	9	0	2	0	0	0	0	0	0	0	0
AEW03032.1	Niako_6809 [Niastella koreensis GR20-10]	0	0	0	1	5	0	0	0	0	0	0	0	0	0	3
ACX62836.1	GYMC10_0533 [Paenibacillus sp. Y412MC10]	0	0	0	0	1	0	0	0	0	0	0	0	0	0	0
ADY53618.1	Pedsa_3079 [Pedobacter saltans DSM 12145]	0	0	0	0	5	0	1	0	0	0	0	0	0	1	0
AGB74548.1	RTCIAT899_PC03740 [Rhizobium tropici CIAT 899]	0	0	0	0	0	0	0	0	0	0	0	0	1	0	0
AFD06181.1	Solca_1074 [Solitalea canadensis DSM 3403]	0	0	0	0	3	0	2	0	0	0	0	0	0	0	0
AGN70391.1	BgGlu1-1GH5 [uncultured bacterium]	0	0	0	0	2	0	0	0	0	0	0	0	0	0	1
GH5_47		0	1	0	0	2	0	0	0	0	0	0	0	0	0	0
Bacteria		0	1	0	0	2	0	0	0	0	0	0	0	0	0	0
ACE82980.1	[Cellvibrio japonicus Ueda107]	0	1	0	0	0	0	0	0	0	0	0	0	0	0	0
ABD82253.1	[Saccharophagus degradans 2-40]	0	0	0	0	1	0	0	0	0	0	0	0	0	0	0
ABD82280.1	[Saccharophagus degradans 2-40]	0	0	0	0	1	0	0	0	0	0	0	0	0	0	0
GH5_48		0	1	0	0	0	0	0	0	0	0	0	0	0	0	0
Bacteria		0	1	0	0	0	0	0	0	0	0	0	0	0	0	0
ABC28850.1	HCH_02016 [Hahella chejuensis KCTC 2396]	0	1	0	0	0	0	0	0	0	0	0	0	0	0	0
GH5_53		0	1	1	0	0	0	0	0	0	0	0	0	0	0	1
Bacteria		0	1	1	0	0	0	0	0	0	0	0	0	0	0	1
ABD82675.1	[Saccharophagus degradans 2-40]	0	0	0	0	0	0	0	0	0	0	0	0	0	0	1
ACR12792.1	TERTU_0428 [Teredinibacter turnerae T7901]	0	1	1	0	0	0	0	0	0	0	0	0	0	0	0
None		1	24	26	1	10	1	1	4	0	2	0	3	4	10	0
Archaea		0	0	5	0	0	0	0	2	0	0	0	1	0	0	0
ACV12559.1	Huta_2393 [Halorhabdus utahensis DSM 12940]	0	0	3	0	0	0	0	2	0	0	0	1	0	0	0
ADB63457.1	Htur_4674 [Haloterrigena turkmenica DSM 5511]	0	0	2	0	0	0	0	0	0	0	0	0	0	0	0
Bacteria		1	24	21	1	7	1	1	2	0	2	0	2	4	10	0
ADE22239.1	endo-beta-1,4-glucanase (End2) [Anabaena laxa RPAN8 / CCC 381]	0	0	2	0	0	0	0	0	0	0	0	0	0	0	0
AEA80486.1	SAR11G3_00011 [Candidatus Pelagibacter sp. IMCC9063]	0	0	0	1	1	0	0	0	0	0	0	0	0	0	0
ADV50845.1	Celal_3584 [Cellulophaga algicola DSM 14237]	0	0	1	0	0	0	0	0	0	0	0	0	4	0	0
ACU61738.1	Cpin_4289 [Chitinophaga pinensis DSM 2588]	0	0	1	0	0	0	0	0	0	0	0	0	0	0	0
CCW35848.1	CCALI_02041 [Chthonomonas calidirosea T49]	0	0	0	0	0	0	1	0	0	0	0	0	0	0	0
ABG59109.1	CHU_1842 [Cytophaga hutchinsonii ATCC 33406]	0	0	0	0	0	0	0	1	0	0	0	0	0	0	0
CDN55595.1	RG1141_CH32600 [Rhizobium galegae bv. officinalis str. HAMBI 1141]	0	19	0	0	0	0	0	0	0	0	0	0	0	1	0
ABB75342.1	Nmul_A2048 [Nitrosospira multiformis ATCC 25196]	0	0	2	0	0	0	0	0	0	0	0	0	0	1	0
BAB77814.1	Alr0290 [Nostoc sp. PCC 7120]	0	3	2	0	1	0	0	0	0	2	0	0	0	3	0
AHF89581.1	OPIT5_04360 [Opitutaceae bacterium TAV5]	1	0	2	0	0	0	0	0	0	0	0	0	0	0	0
AEW84604.1	TIA2EST36_10230 [Propionibacterium acnes TypeIA2 P.acn31]	0	0	0	0	0	0	0	0	0	0	0	0	0	1	0
ABN52701.1	[Clostridium thermocellum ATCC 27405]	0	0	0	0	2	0	0	0	0	0	0	0	0	0	0
AEI46564.1	Runsl_0106 [Runella slithyformis DSM 19594]	0	0	0	0	2	1	0	0	0	0	0	0	0	0	0
ABD81750.1	(3.2.1.4) [Saccharophagus degradans 2-40]	0	0	1	0	0	0	0	0	0	0	0	0	0	0	0
ABD82250.1	[Saccharophagus degradans 2-40]	0	0	2	0	0	0	0	0	0	0	0	0	0	0	0
AFU98524.1	M5M_06645 [Simiduia agarivorans SA1 = DSM 21679]	0	0	3	0	1	0	0	0	0	0	0	0	0	1	0
CAN92927.1	sce2768 [Sorangium cellulosum 'So ce 56']	0	0	1	0	0	0	0	0	0	0	0	1	0	2	0
CAN95883.1	sce5720 [Sorangium cellulosum 'So ce 56']	0	1	0	0	0	0	0	0	0	0	0	0	0	0	0
AGP36057.1	SCE1572_17025 [Sorangium cellulosum So0157-2]	0	0	1	0	0	0	0	1	0	0	0	1	0	0	0
AGP39054.1	SCE1572_33970 [Sorangium cellulosum So0157-2]	0	0	1	0	0	0	0	0	0	0	0	0	0	1	0
ADZ81015.1	Sph21_4498 [Sphingobacterium sp. 21]	0	1	0	0	0	0	0	0	0	0	0	0	0	0	0
AEV15219.1	TCCBUS3UF1_1700 [Thermus sp. CCB_US3_UF1]	0	0	1	0	0	0	0	0	0	0	0	0	0	0	0
AGT44217.1	TPE_1743 [Treponema pedis str. T A4]	0	0	1	0	0	0	0	0	0	0	0	0	0	0	0
Eukaryota		0	0	0	0	3	0	0	0	0	0	0	0	0	0	0
CCA17636.1	ALNC14_037790 (Alnc14c38g3295) [Albugo laibachii Nc14]	0	0	0	0	2	0	0	0	0	0	0	0	0	0	0
CCA22662.1	ALNC14_088050 (Alnc14c163g7812) (possible fragment) [Albugo laibachii Nc14]	0	0	0	0	1	0	0	0	0	0	0	0	0	0	0
GH6		0	11	6	1	2	0	0	5	0	0	0	5	2	6	1
Bacteria		0	11	6	1	2	0	0	5	0	0	0	5	2	6	1
AGZ39343.1	AFR_05270 [Actinoplanes friuliensis DSM 7358]	0	0	0	0	1	0	0	0	0	0	0	0	0	0	0
[truncated: 26,666 more rows]
